# Supplementary material for: In-Silico Evaluation and Selection of the Best 16S rRNA Gene Primers for Use in Next-Generation Sequencing to Detect Oral Bacteria and Archaea.
Source: Research Square preprint supplement (doi:10.21203/rs.3.rs-516961/v1), 2021-05-24
Supplement: Supplementary file 1 [file 057979c8959d145461e67df0.xlsx]

## Sheet: Title.Abreviatures
Additional table 16. Evaluation of individual forward primers for the detection of oral archaea
Additional table 17. Evaluation of individual reverse primers for the detection of oral archaea
Additional table 18. Evaluation of unidentified primers as forward for the detection of oral archaea
Additional table 19. Evaluation of unidentified primers as reverse for the detection of oral archaea
P_Mean_IP	Primer_mean_initial_position
P_Mean_EP	Primer_mean_end_position
P_Mode_IP	Primer_mode_initial_position
P_Mode_EP	Primer_mode_end_position
16S_Region_Mode_IP	16S Region_mode_initial_position
16S_Region_Mode_EP	16S Region_mode_end_position

## Sheet: Forward
Primer_identifier	Mismatches	Variant_Coverage(%)	Analyzed_genes	Covered_genes	Non_covered_genes	Species_Coverage(%)	Analyzed_species	Covered_species	Non_covered_species	P_Mean_IP	P_Mean_EP	P_Mode_IP	P_Mode_EP	16S_Region_Mode_IP	16S_Region_Mode_EP
KP_F001	0	12.91	2842	367	2475	27.32	194	53	141	11	31	2	22	C1	C1
KP_F002	0	12.91	2842	367	2475	27.32	194	53	141	11	31	2	22	C1	C1
KP_F003	0	0	2842	0	2842	0	194	0	194	0	0	0	0	-	-
KP_F004	0	19.35	2842	550	2292	38.66	194	75	119	10	26	3	19	C1	C1
KP_F005	0	23.93	2842	680	2162	42.27	194	82	112	8	24	3	19	C1	C1
KP_F006	0	4.93	2842	140	2702	12.37	194	24	170	3	20	2	19	C1	C1
KP_F007	0	34.98	2842	994	1848	44.33	194	86	108	6	23	1	18	C1	C1
KP_F008	0	4.96	2842	141	2701	11.34	194	22	172	3	20	1	18	C1	C1
KP_F009	0	39.94	2842	1135	1707	46.91	194	91	103	6	23	1	18	C1	C1
KP_F010	0	33.22	2842	944	1898	42.27	194	82	112	7	24	2	19	C1	C1
KP_F011	0	13.72	2842	390	2452	27.84	194	54	140	11	30	2	21	C1	C1
KP_F012	0	55.81	2842	1586	1256	62.37	194	121	73	41	56	41	56	C1	C1
KP_F013	0	37.58	2842	1068	1774	55.67	194	108	86	81	98	79	96	V1	V1
KP_F014	0	36.38	2842	1034	1808	49.48	194	96	98	312	327	308	323	C3	C3
KP_F015	0	59.82	2842	1700	1142	75.77	194	147	47	329	343	324	338	C3	C3
KP_F016	0	65.06	2842	1849	993	95.88	194	186	8	323	341	314	332	C3	C3
KP_F017	0	59.25	2842	1684	1158	74.23	194	144	50	323	343	318	338	C3	C3
KP_F018	0	83.11	2842	2362	480	95.88	194	186	8	330	347	322	339	C3	C3
KP_F019	0	73.79	2842	2097	745	78.35	194	152	42	456	481	447	472	V3	V3
KP_F020	0	85.22	2842	2422	420	99.48	194	193	1	459	474	450	465	V3	V3
KP_F021	0	39.51	2842	1123	1719	57.22	194	111	83	720	740	709	729	C5	C5
KP_F022	0	82.86	2842	2355	487	93.3	194	181	13	859	878	850	869	V5	C6
KP_F023	0	82.79	2842	2353	489	93.3	194	181	13	859	879	850	870	V5	C6
KP_F024	0	24.81	2842	705	2137	48.45	194	94	100	912	931	896	915	C6	C6
KP_F025	0	60.63	2842	1723	1119	84.54	194	164	30	905	924	902	921	C6	C6
KP_F026	0	60.63	2842	1723	1119	84.54	194	164	30	905	923	902	920	C6	C6
KP_F027	0	0	2842	0	2842	0	194	0	194	0	0	0	0	-	-
KP_F028	0	7.81	2842	222	2620	15.98	194	31	163	16	36	1	21	C1	C1
KP_F029	0	0	2842	0	2842	0	194	0	194	0	0	0	0	-	-
KP_F030	0	0	2842	0	2842	0	194	0	194	0	0	0	0	-	-
KP_F031	0	0	2842	0	2842	0	194	0	194	0	0	0	0	-	-
KP_F032	0	0	2842	0	2842	0	194	0	194	0	0	0	0	-	-
KP_F033	0	0	2842	0	2842	0	194	0	194	0	0	0	0	-	-
KP_F034	0	0	2842	0	2842	0	194	0	194	0	0	0	0	-	-
KP_F035	0	0	2842	0	2842	0	194	0	194	0	0	0	0	-	-
KP_F036	0	0	2842	0	2842	0	194	0	194	0	0	0	0	-	-
KP_F037	0	0	2842	0	2842	0	194	0	194	0	0	0	0	-	-
KP_F038	0	0	2842	0	2842	0	194	0	194	0	0	0	0	-	-
KP_F039	0	0	2842	0	2842	0	194	0	194	0	0	0	0	-	-
KP_F040	0	0	2842	0	2842	0	194	0	194	0	0	0	0	-	-
KP_F041	0	0	2842	0	2842	0	194	0	194	0	0	0	0	-	-
KP_F042	0	0	2842	0	2842	0	194	0	194	0	0	0	0	-	-
KP_F043	0	0	2842	0	2842	0	194	0	194	0	0	0	0	-	-
KP_F044	0	0	2842	0	2842	0	194	0	194	0	0	0	0	-	-
KP_F045	0	0	2842	0	2842	0	194	0	194	0	0	0	0	-	-
KP_F046	0	0	2842	0	2842	0	194	0	194	0	0	0	0	-	-
KP_F047	0	0	2842	0	2842	0	194	0	194	0	0	0	0	-	-
KP_F048	0	0	2842	0	2842	0	194	0	194	0	0	0	0	-	-
KP_F049	0	0	2842	0	2842	0	194	0	194	0	0	0	0	-	-
KP_F050	0	0	2842	0	2842	0	194	0	194	0	0	0	0	-	-
KP_F051	0	52.46	2842	1491	1351	63.92	194	124	70	450	466	453	469	V3	V3
KP_F052	0	3.24	2842	92	2750	9.79	194	19	175	446	464	443	461	V3	V3
KP_F053	0	0	2842	0	2842	0	194	0	194	0	0	0	0	-	-
KP_F054	0	3.24	2842	92	2750	9.79	194	19	175	447	464	444	461	V3	V3
KP_F055	0	1.83	2842	52	2790	4.12	194	8	186	451	468	461	478	V3	V3
KP_F056	0	4.4	2842	125	2717	8.76	194	17	177	524	539	489	504	V3	C4
KP_F057	0	0.07	2842	2	2840	0.52	194	1	193	734	749	734	749	C5	C5
KP_F058	0	0	2842	0	2842	0	194	0	194	0	0	0	0	-	-
KP_F059	0	84.55	2842	2403	439	98.97	194	192	2	727	745	716	734	C5	C5
KP_F060	0	0.14	2842	4	2838	1.03	194	2	192	848	868	851	871	V5	C6
KP_F061	0	0	2842	0	2842	0	194	0	194	0	0	0	0	-	-
KP_F062	0	0	2842	0	2842	0	194	0	194	0	0	0	0	-	-
KP_F063	0	0	2842	0	2842	0	194	0	194	0	0	0	0	-	-
KP_F064	0	0	2842	0	2842	0	194	0	194	0	0	0	0	-	-
KP_F065	0	0	2842	0	2842	0	194	0	194	0	0	0	0	-	-
KP_F066	0	0	2842	0	2842	0	194	0	194	0	0	0	0	-	-
KP_F067	0	0	2842	0	2842	0	194	0	194	0	0	0	0	-	-
KP_F068	0	0	2842	0	2842	0	194	0	194	0	0	0	0	-	-
KP_F069	0	0	2842	0	2842	0	194	0	194	0	0	0	0	-	-
KP_F070	0	0	2842	0	2842	0	194	0	194	0	0	0	0	-	-
KP_F071	0	0	2842	0	2842	0	194	0	194	0	0	0	0	-	-
KP_F072	0	0	2842	0	2842	0	194	0	194	0	0	0	0	-	-
KP_F073	0	0	2842	0	2842	0	194	0	194	0	0	0	0	-	-
KP_F074	0	0	2842	0	2842	0	194	0	194	0	0	0	0	-	-
KP_F075	0	0	2842	0	2842	0	194	0	194	0	0	0	0	-	-
KP_F076	0	0	2842	0	2842	0	194	0	194	0	0	0	0	-	-
KP_F077	0	52.71	2842	1498	1344	70.62	194	137	57	320	337	321	338	C3	C3
KP_F078	0	52.18	2842	1483	1359	63.92	194	124	70	450	469	453	472	V3	V3
KP_F079	0	42.65	2842	1212	1630	59.79	194	116	78	467	485	458	476	V3	V3
KP_F080	0	46.45	2842	1320	1522	58.25	194	113	81	695	713	681	699	C5	C5
KP_F081	0	0	2842	0	2842	0	194	0	194	0	0	0	0	-	-
KP_F082	0	80.08	2842	2276	566	88.66	194	172	22	728	746	720	738	C5	C5
KP_F083	0	83.29	2842	2367	475	96.39	194	187	7	852	869	841	858	V5	C6
KP_F084	0	48.21	2842	1370	1472	57.22	194	111	83	994	1010	984	1000	C6	V6
KP_F085	0	64.71	2842	1839	1003	88.14	194	171	23	1046	1061	1034	1049	V6	C7
OP_F001	0	59.25	2842	1684	1158	74.23	194	144	50	323	343	318	338	C3	C3
OP_F002	0	83.11	2842	2362	480	95.88	194	186	8	330	347	322	339	C3	C3
OP_F003	0	36.38	2842	1034	1808	49.48	194	96	98	312	327	308	323	C3	C3
OP_F004	0	37.58	2842	1068	1774	55.67	194	108	86	81	98	79	96	V1	V1
OP_F005	0	52.18	2842	1483	1359	63.92	194	124	70	450	469	453	472	V3	V3
OP_F006	0	26.43	2842	751	2091	34.54	194	67	127	278	297	274	293	C3	C3
OP_F007	0	85.22	2842	2422	420	99.48	194	193	1	459	474	450	465	V3	V3
OP_F008	0	0	2842	0	2842	0	194	0	194	0	0	0	0	-	-
OP_F009	0	80.26	2842	2281	561	89.69	194	174	20	724	745	716	737	C5	C5
OP_F010	0	26.53	2842	754	2088	34.54	194	67	127	279	297	275	293	C3	C3
OP_F011	0	0.14	2842	4	2838	2.06	194	4	190	254	274	178	350	V2	C3
OP_F012	0	40.82	2842	1160	1682	55.67	194	108	86	468	487	458	477	V3	V3
OP_F013	0	73.79	2842	2097	745	78.35	194	152	42	456	481	447	472	V3	V3
OP_F014	0	77.23	2842	2195	647	89.18	194	173	21	455	474	446	465	V3	V3
OP_F015	0	1.58	2842	45	2797	5.67	194	11	183	253	271	252	270	C3	C3
OP_F016	0	37.58	2842	1068	1774	55.67	194	108	86	81	96	79	94	V1	V1
OP_F017	0	50.63	2842	1439	1403	58.25	194	113	81	84	100	82	98	V1	V1
OP_F018	0	9.54	2842	271	2571	52.58	194	102	92	711	731	719	739	C5	C5
OP_F019	0	0.14	2842	4	2838	1.03	194	2	192	924	944	924	944	C6	C6
OP_F020	0	0	2842	0	2842	0	194	0	194	0	0	0	0	-	-
OP_F021	0	52.46	2842	1491	1351	63.92	194	124	70	450	466	453	469	V3	V3
OP_F022	0	52.18	2842	1483	1359	63.92	194	124	70	450	469	453	472	V3	V3
OP_F023	0	0	2842	0	2842	0	194	0	194	0	0	0	0	-	-
OP_F024	0	0	2842	0	2842	0	194	0	194	0	0	0	0	-	-
OP_F025	0	0	2842	0	2842	0	194	0	194	0	0	0	0	-	-
OP_F026	0	0	2842	0	2842	0	194	0	194	0	0	0	0	-	-
OP_F027	0	0	2842	0	2842	0	194	0	194	0	0	0	0	-	-
OP_F028	0	0	2842	0	2842	0	194	0	194	0	0	0	0	-	-
OP_F029	0	80.26	2842	2281	561	89.69	194	174	20	724	745	716	737	C5	C5
OP_F030	0	3.24	2842	92	2750	9.79	194	19	175	445	464	442	461	V3	V3
OP_F031	0	0	2842	0	2842	0	194	0	194	0	0	0	0	-	-
OP_F032	0	0	2842	0	2842	0	194	0	194	0	0	0	0	-	-
OP_F033	0	0	2842	0	2842	0	194	0	194	0	0	0	0	-	-
OP_F034	0	0	2842	0	2842	0	194	0	194	0	0	0	0	-	-
OP_F035	0	0	2842	0	2842	0	194	0	194	0	0	0	0	-	-
OP_F036	0	0	2842	0	2842	0	194	0	194	0	0	0	0	-	-
OP_F037	0	0	2842	0	2842	0	194	0	194	0	0	0	0	-	-
OP_F038	0	0	2842	0	2842	0	194	0	194	0	0	0	0	-	-
OP_F039	0	0	2842	0	2842	0	194	0	194	0	0	0	0	-	-
OP_F040	0	0	2842	0	2842	0	194	0	194	0	0	0	0	-	-
OP_F041	0	0	2842	0	2842	0	194	0	194	0	0	0	0	-	-
OP_F042	0	0	2842	0	2842	0	194	0	194	0	0	0	0	-	-
OP_F043	0	78.96	2842	2244	598	81.96	194	159	35	318	335	314	331	C3	C3
OP_F044	0	0.14	2842	4	2838	1.03	194	2	192	848	868	851	871	V5	C6
OP_F045	0	0	2842	0	2842	0	194	0	194	0	0	0	0	-	-
OP_F046	0	0.39	2842	11	2831	3.09	194	6	188	343	368	344	369	C3	C3
OP_F047	0	77.23	2842	2195	647	89.18	194	173	21	455	474	446	465	V3	V3
OP_F048	0	0	2842	0	2842	0	194	0	194	0	0	0	0	-	-
OP_F049	0	0	2842	0	2842	0	194	0	194	0	0	0	0	-	-
OP_F050	0	0	2842	0	2842	0	194	0	194	0	0	0	0	-	-
OP_F051	0	0	2842	0	2842	0	194	0	194	0	0	0	0	-	-
OP_F052	0	52.46	2842	1491	1351	63.92	194	124	70	450	466	453	469	V3	V3
OP_F053	0	0	2842	0	2842	0	194	0	194	0	0	0	0	-	-
OP_F054	0	0	2842	0	2842	0	194	0	194	0	0	0	0	-	-
OP_F055	0	0	2842	0	2842	0	194	0	194	0	0	0	0	-	-
OP_F056	0	0	2842	0	2842	0	194	0	194	0	0	0	0	-	-
OP_F057	0	0	2842	0	2842	0	194	0	194	0	0	0	0	-	-
OP_F058	0	0	2842	0	2842	0	194	0	194	0	0	0	0	-	-
OP_F059	0	0	2842	0	2842	0	194	0	194	0	0	0	0	-	-
OP_F060	0	0	2842	0	2842	0	194	0	194	0	0	0	0	-	-
OP_F061	0	52.71	2842	1498	1344	70.62	194	137	57	320	337	321	338	C3	C3
OP_F062	0	0	2842	0	2842	0	194	0	194	0	0	0	0	-	-
OP_F063	0	0	2842	0	2842	0	194	0	194	0	0	0	0	-	-
OP_F064	0	0	2842	0	2842	0	194	0	194	0	0	0	0	-	-
OP_F065	0	0	2842	0	2842	0	194	0	194	0	0	0	0	-	-
OP_F066	0	85.12	2842	2419	423	99.48	194	193	1	727	740	716	729	C5	C5
OP_F067	0	0	2842	0	2842	0	194	0	194	0	0	0	0	-	-
OP_F068	0	0	2842	0	2842	0	194	0	194	0	0	0	0	-	-
OP_F069	0	0	2842	0	2842	0	194	0	194	0	0	0	0	-	-
OP_F070	0	0	2842	0	2842	0	194	0	194	0	0	0	0	-	-
OP_F071	0	0	2842	0	2842	0	194	0	194	0	0	0	0	-	-
OP_F072	0	0	2842	0	2842	0	194	0	194	0	0	0	0	-	-
OP_F073	0	0	2842	0	2842	0	194	0	194	0	0	0	0	-	-
OP_F074	0	0	2842	0	2842	0	194	0	194	0	0	0	0	-	-
OP_F075	0	0	2842	0	2842	0	194	0	194	0	0	0	0	-	-
OP_F076	0	0.21	2842	6	2836	0.52	194	1	193	724	745	724	745	C5	C5
OP_F077	0	0	2842	0	2842	0	194	0	194	0	0	0	0	-	-
OP_F078	0	0	2842	0	2842	0	194	0	194	0	0	0	0	-	-
OP_F079	0	0.21	2842	6	2836	0.52	194	1	193	726	746	726	746	C5	C5
OP_F080	0	0	2842	0	2842	0	194	0	194	0	0	0	0	-	-
OP_F081	0	0	2842	0	2842	0	194	0	194	0	0	0	0	-	-
OP_F082	0	0	2842	0	2842	0	194	0	194	0	0	0	0	-	-
OP_F083	0	4.4	2842	125	2717	8.76	194	17	177	524	539	489	504	V3	C4
OP_F084	0	0	2842	0	2842	0	194	0	194	0	0	0	0	-	-
OP_F085	0	0	2842	0	2842	0	194	0	194	0	0	0	0	-	-
OP_F086	0	0	2842	0	2842	0	194	0	194	0	0	0	0	-	-
OP_F087	0	0	2842	0	2842	0	194	0	194	0	0	0	0	-	-
OP_F088	0	0	2842	0	2842	0	194	0	194	0	0	0	0	-	-
OP_F089	0	0	2842	0	2842	0	194	0	194	0	0	0	0	-	-
OP_F090	0	0	2842	0	2842	0	194	0	194	0	0	0	0	-	-
OP_F091	0	0	2842	0	2842	0	194	0	194	0	0	0	0	-	-
OP_F092	0	0	2842	0	2842	0	194	0	194	0	0	0	0	-	-
OP_F093	0	0	2842	0	2842	0	194	0	194	0	0	0	0	-	-
OP_F094	0	0	2842	0	2842	0	194	0	194	0	0	0	0	-	-
OP_F095	0	0	2842	0	2842	0	194	0	194	0	0	0	0	-	-
OP_F096	0	0	2842	0	2842	0	194	0	194	0	0	0	0	-	-
OP_F097	0	0	2842	0	2842	0	194	0	194	0	0	0	0	-	-
OP_F098	0	3.24	2842	92	2750	9.79	194	19	175	448	465	445	462	V3	V3
OP_F099	0	0	2842	0	2842	0	194	0	194	0	0	0	0	-	-
OP_F100	0	77.48	2842	2202	640	89.18	194	173	21	455	473	446	464	V3	V3
OP_F101	0	0	2842	0	2842	0	194	0	194	0	0	0	0	-	-
OP_F102	0	0	2842	0	2842	0	194	0	194	0	0	0	0	-	-
OP_F103	0	0	2842	0	2842	0	194	0	194	0	0	0	0	-	-
OP_F104	0	0	2842	0	2842	0	194	0	194	0	0	0	0	-	-
OP_F105	0	0	2842	0	2842	0	194	0	194	0	0	0	0	-	-
OP_F106	0	0	2842	0	2842	0	194	0	194	0	0	0	0	-	-
OP_F107	0	0	2842	0	2842	0	194	0	194	0	0	0	0	-	-
OP_F108	0	0	2842	0	2842	0	194	0	194	0	0	0	0	-	-
OP_F109	0	0	2842	0	2842	0	194	0	194	0	0	0	0	-	-
OP_F110	0	0	2842	0	2842	0	194	0	194	0	0	0	0	-	-
OP_F111	0	0	2842	0	2842	0	194	0	194	0	0	0	0	-	-
OP_F112	0	0	2842	0	2842	0	194	0	194	0	0	0	0	-	-
OP_F113	0	0	2842	0	2842	0	194	0	194	0	0	0	0	-	-
OP_F114	0	85.05	2842	2417	425	99.48	194	193	1	322	339	314	331	C3	C3
OP_F115	0	0	2842	0	2842	0	194	0	194	0	0	0	0	-	-
OP_F116	0	0	2842	0	2842	0	194	0	194	0	0	0	0	-	-
OP_F117	0	0	2842	0	2842	0	194	0	194	0	0	0	0	-	-
OP_F118	0	0	2842	0	2842	0	194	0	194	0	0	0	0	-	-

## Sheet: Reverse
Primer_identifier	Mismatches	Variant_Coverage(%)	Analyzed_genes	Covered_genes	Non_covered_genes	Species_Coverage(%)	Analyzed_species	Covered_species	Non_covered_species	P_Mean_IP	P_Mean_EP	P_Mode_IP	P_Mode_EP	16S_Region_Mode_IP	16S_Region_Mode_EP
KP_R001	0	2.22	2842	63	2779	8.25	194	16	178	284	304	289	309	C3	C3
KP_R002	0	85.22	2842	2422	420	99.48	194	193	1	459	474	450	465	V3	V3
KP_R003	0	85.05	2842	2417	425	98.97	194	192	2	459	478	450	469	V3	V3
KP_R004	0	34.13	2842	970	1872	37.63	194	73	121	629	644	632	647	V4	V4
KP_R005	0	84.24	2842	2394	448	97.94	194	190	4	729	749	718	738	C5	C5
KP_R006	0	82.97	2842	2358	484	95.88	194	186	8	852	874	841	863	V5	C6
KP_R007	0	82.79	2842	2353	489	93.3	194	181	13	859	879	850	870	V5	C6
KP_R008	0	82.27	2842	2338	504	91.75	194	178	16	855	875	846	866	V5	C6
KP_R009	0	0	2842	0	2842	0	194	0	194	0	0	0	0	-	-
KP_R010	0	60.63	2842	1723	1119	84.54	194	164	30	905	924	902	921	C6	C6
KP_R011	0	24.81	2842	705	2137	48.45	194	94	100	912	931	896	915	C6	C6
KP_R012	0	11.15	2842	317	2525	65.98	194	128	66	529	548	537	556	C4	C4
KP_R013	0	83.85	2842	2383	459	96.39	194	187	7	984	1002	972	990	C6	C6
KP_R014	0	82.97	2842	2358	484	90.72	194	176	18	989	1006	977	994	C6	C6
KP_R015	0	63.58	2842	1807	1035	86.08	194	167	27	1044	1061	1032	1049	V6	C7
KP_R016	0	46.52	2842	1322	1520	92.27	194	179	15	1440	1459	1425	1444	C9	V9
KP_R017	0	0	2842	0	2842	0	194	0	194	0	0	0	0	-	-
KP_R018	0	0	2842	0	2842	0	194	0	194	0	0	0	0	-	-
KP_R019	0	0	2842	0	2842	0	194	0	194	0	0	0	0	-	-
KP_R020	0	0	2842	0	2842	0	194	0	194	0	0	0	0	-	-
KP_R021	0	3.24	2842	92	2750	9.79	194	19	175	445	464	442	461	V3	V3
KP_R022	0	1.83	2842	52	2790	4.12	194	8	186	450	468	460	478	V3	V3
KP_R023	0	1.83	2842	52	2790	4.12	194	8	186	451	468	461	478	V3	V3
KP_R024	0	1.83	2842	52	2790	4.12	194	8	186	451	468	461	478	V3	V3
KP_R025	0	1.83	2842	52	2790	4.12	194	8	186	451	468	461	478	V3	V3
KP_R026	0	1.83	2842	52	2790	4.12	194	8	186	451	468	461	478	V3	V3
KP_R027	0	7.21	2842	205	2637	45.88	194	89	105	979	997	976	994	C6	C6
KP_R028	0	0	2842	0	2842	0	194	0	194	0	0	0	0	-	-
KP_R029	0	0	2842	0	2842	0	194	0	194	0	0	0	0	-	-
KP_R030	0	0.07	2842	2	2840	0.52	194	1	193	734	749	734	749	C5	C5
KP_R031	0	84.55	2842	2403	439	98.97	194	192	2	727	745	716	734	C5	C5
KP_R032	0	84.66	2842	2406	436	99.48	194	193	1	727	745	716	734	C5	C5
KP_R033	0	0.21	2842	6	2836	0.52	194	1	193	724	743	724	743	C5	C5
KP_R034	0	1.86	2842	53	2789	5.67	194	11	183	819	838	712	731	C5	C5
KP_R035	0	84.52	2842	2402	440	98.97	194	192	2	727	748	716	737	C5	C5
KP_R036	0	0.21	2842	6	2836	0.52	194	1	193	726	745	726	745	C5	C5
KP_R037	0	0.21	2842	6	2836	0.52	194	1	193	726	746	726	746	C5	C5
KP_R038	0	84.41	2842	2399	443	97.94	194	190	4	729	749	718	738	C5	C5
KP_R039	0	0.14	2842	4	2838	1.03	194	2	192	848	868	851	871	V5	C6
KP_R040	0	0	2842	0	2842	0	194	0	194	0	0	0	0	-	-
KP_R041	0	0	2842	0	2842	0	194	0	194	0	0	0	0	-	-
KP_R042	0	0	2842	0	2842	0	194	0	194	0	0	0	0	-	-
KP_R043	0	0	2842	0	2842	0	194	0	194	0	0	0	0	-	-
KP_R044	0	0	2842	0	2842	0	194	0	194	0	0	0	0	-	-
KP_R045	0	0	2842	0	2842	0	194	0	194	0	0	0	0	-	-
KP_R046	0	0.14	2842	4	2838	2.06	194	4	190	975	994	975	994	C6	C6
KP_R047	0	0	2842	0	2842	0	194	0	194	0	0	0	0	-	-
KP_R048	0	26.85	2842	763	2079	11.34	194	22	172	975	994	975	994	C6	C6
KP_R049	0	0	2842	0	2842	0	194	0	194	0	0	0	0	-	-
KP_R050	0	26.99	2842	767	2075	11.34	194	22	172	975	994	975	994	C6	C6
KP_R051	0	0.14	2842	4	2838	2.06	194	4	190	975	994	975	994	C6	C6
KP_R052	0	0.04	2842	1	2841	0.52	194	1	193	975	991	975	991	C6	C6
KP_R053	0	0.63	2842	18	2824	3.61	194	7	187	1339	1356	1001	1018	V6	V6
KP_R054	0	0.63	2842	18	2824	3.61	194	7	187	1339	1358	1001	1020	V6	V6
KP_R055	0	0.63	2842	18	2824	3.61	194	7	187	1339	1359	1001	1021	V6	V6
KP_R056	0	0	2842	0	2842	0	194	0	194	0	0	0	0	-	-
KP_R057	0	0	2842	0	2842	0	194	0	194	0	0	0	0	-	-
KP_R058	0	0	2842	0	2842	0	194	0	194	0	0	0	0	-	-
KP_R059	0	0	2842	0	2842	0	194	0	194	0	0	0	0	-	-
KP_R060	0	83.67	2842	2378	464	97.42	194	189	5	1342	1359	1329	1346	C9	C9
KP_R061	0	83.6	2842	2376	466	96.91	194	188	6	1342	1359	1329	1346	C9	C9
KP_R062	0	83.6	2842	2376	466	96.91	194	188	6	1343	1359	1330	1346	C9	C9
KP_R063	0	73.68	2842	2094	748	96.39	194	187	7	1434	1450	1420	1436	C9	V9
KP_R064	0	65.02	2842	1848	994	93.3	194	181	13	1435	1454	1420	1439	C9	V9
KP_R065	0	44.16	2842	1255	1587	91.24	194	177	17	1441	1463	1425	1447	C9	V9
KP_R066	0	69.6	2842	1978	864	96.39	194	187	7	1435	1451	1421	1437	C9	V9
KP_R067	0	3.13	2842	89	2753	14.95	194	29	165	1428	1448	1422	1442	C9	V9
KP_R068	0	0.99	2842	28	2814	11.86	194	23	171	1468	1488	1485	1505	C10	C10
KP_R069	0	0	2842	0	2842	0	194	0	194	0	0	0	0	-	-
KP_R070	0	42.65	2842	1212	1630	59.79	194	116	78	467	485	458	476	V3	V3
KP_R071	0	52.6	2842	1495	1347	64.43	194	125	69	452	467	455	470	V3	V3
KP_R072	0	83.29	2842	2367	475	96.39	194	187	7	852	869	841	858	V5	C6
KP_R073	0	48.21	2842	1370	1472	57.22	194	111	83	994	1010	984	1000	C6	V6
KP_R074	0	64.71	2842	1839	1003	88.14	194	171	23	1046	1061	1034	1049	V6	C7
KP_R075	0	83.64	2842	2377	465	96.91	194	188	6	1340	1357	1328	1345	C9	C9
KP_R076	0	83.71	2842	2379	463	97.42	194	189	5	1340	1357	1328	1345	C9	C9
KP_R077	0	0.14	2842	4	2838	1.03	194	2	192	1326	1344	1338	1356	C9	C9
KP_R078	0	83.67	2842	2378	464	96.91	194	188	6	1343	1358	1330	1345	C9	C9
KP_R079	0	43.67	2842	1241	1601	91.24	194	177	17	1441	1462	1425	1446	C9	V9
KP_R080	0	18.51	2842	526	2316	28.87	194	56	138	1423	1442	1420	1439	C9	V9
KP_R081	0	1.94	2842	55	2787	19.07	194	37	157	1464	1481	1457	1474	V9	C10
OP_R001	0	82.79	2842	2353	489	93.3	194	181	13	859	879	850	870	V5	C6
OP_R002	0	85.22	2842	2422	420	99.48	194	193	1	459	474	450	465	V3	V3
OP_R003	0	24.81	2842	705	2137	48.45	194	94	100	912	931	896	915	C6	C6
OP_R004	0	81.74	2842	2323	519	89.18	194	173	21	1326	1346	1317	1337	C9	C9
OP_R005	0	84.24	2842	2394	448	97.94	194	190	4	729	749	718	738	C5	C5
OP_R006	0	57.88	2842	1645	1197	69.59	194	135	59	896	917	898	919	C6	C6
OP_R007	0	83.85	2842	2383	459	96.39	194	187	7	984	1002	972	990	C6	C6
OP_R008	0	1.02	2842	29	2813	12.37	194	24	170	1467	1487	1485	1505	C10	C10
OP_R009	0	0.63	2842	18	2824	3.61	194	7	187	1339	1359	1001	1021	V6	V6
OP_R010	0	84.41	2842	2399	443	97.94	194	190	4	729	749	718	738	C5	C5
OP_R011	0	0.18	2842	5	2837	2.58	194	5	189	749	768	793	812	C5	C5
OP_R012	0	83.22	2842	2365	477	93.81	194	182	12	861	879	852	870	V5	C6
OP_R013	0	84.66	2842	2406	436	99.48	194	193	1	727	745	716	734	C5	C5
OP_R014	0	84.52	2842	2402	440	98.45	194	191	3	729	749	718	738	C5	C5
OP_R015	0	0.53	2842	15	2827	2.58	194	5	189	639	657	641	659	V4	C5
OP_R016	0	82.69	2842	2350	492	92.78	194	180	14	1333	1349	1324	1340	C9	C9
OP_R017	0	0.18	2842	5	2837	1.55	194	3	191	819	839	816	836	C5	V5
OP_R018	0	0.14	2842	4	2838	1.03	194	2	192	1001	1021	1001	1021	V6	V6
OP_R019	0	0.07	2842	2	2840	1.03	194	2	192	454	474	454	474	V3	V3
OP_R020	0	84.52	2842	2402	440	98.97	194	192	2	729	748	718	737	C5	C5
OP_R021	0	84.41	2842	2399	443	97.94	194	190	4	729	749	718	738	C5	C5
OP_R022	0	0	2842	0	2842	0	194	0	194	0	0	0	0	-	-
OP_R023	0	1.83	2842	52	2790	4.12	194	8	186	451	468	461	478	V3	V3
OP_R024	0	0	2842	0	2842	0	194	0	194	0	0	0	0	-	-
OP_R025	0	0	2842	0	2842	0	194	0	194	0	0	0	0	-	-
OP_R026	0	0	2842	0	2842	0	194	0	194	0	0	0	0	-	-
OP_R027	0	0	2842	0	2842	0	194	0	194	0	0	0	0	-	-
OP_R028	0	0	2842	0	2842	0	194	0	194	0	0	0	0	-	-
OP_R029	0	0	2842	0	2842	0	194	0	194	0	0	0	0	-	-
OP_R030	0	0.63	2842	18	2824	3.61	194	7	187	1339	1359	1001	1021	V6	V6
OP_R031	0	0	2842	0	2842	0	194	0	194	0	0	0	0	-	-
OP_R032	0	80.3	2842	2282	560	89.69	194	174	20	724	742	716	734	C5	C5
OP_R033	0	0	2842	0	2842	0	194	0	194	0	0	0	0	-	-
OP_R034	0	0	2842	0	2842	0	194	0	194	0	0	0	0	-	-
OP_R035	0	84.52	2842	2402	440	98.97	194	192	2	727	748	716	737	C5	C5
OP_R036	0	84.52	2842	2402	440	98.45	194	191	3	729	749	718	738	C5	C5
OP_R037	0	3.24	2842	92	2750	9.79	194	19	175	445	464	442	461	V3	V3
OP_R038	0	3.24	2842	92	2750	9.79	194	19	175	445	463	442	460	V3	V3
OP_R039	0	1.86	2842	53	2789	5.67	194	11	183	819	838	712	731	C5	C5
OP_R040	0	3.24	2842	92	2750	9.79	194	19	175	445	462	442	459	V3	V3
OP_R041	0	42.65	2842	1212	1630	59.79	194	116	78	467	485	458	476	V3	V3
OP_R042	0	0	2842	0	2842	0	194	0	194	0	0	0	0	-	-
OP_R043	0	3.24	2842	92	2750	9.79	194	19	175	445	461	442	458	V3	V3
OP_R044	0	84.66	2842	2406	436	99.48	194	193	1	727	745	716	734	C5	C5
OP_R045	0	1.83	2842	52	2790	4.12	194	8	186	453	468	463	478	V3	V3
OP_R046	0	0.63	2842	18	2824	3.61	194	7	187	1339	1359	1001	1021	V6	V6
OP_R047	0	0.04	2842	1	2841	0.52	194	1	193	454	474	454	474	V3	V3
OP_R048	0	84.52	2842	2402	440	98.45	194	191	3	727	749	716	738	C5	C5
OP_R049	0	0	2842	0	2842	0	194	0	194	0	0	0	0	-	-
OP_R050	0	0.14	2842	4	2838	1.03	194	2	192	848	868	851	871	V5	C6
OP_R051	0	1.83	2842	52	2790	4.12	194	8	186	448	470	458	480	V3	V3
OP_R052	0	0.14	2842	4	2838	1.03	194	2	192	850	868	853	871	V5	C6
OP_R053	0	0.21	2842	6	2836	0.52	194	1	193	726	746	726	746	C5	C5
OP_R054	0	0	2842	0	2842	0	194	0	194	0	0	0	0	-	-
OP_R055	0	0	2842	0	2842	0	194	0	194	0	0	0	0	-	-
OP_R056	0	0	2842	0	2842	0	194	0	194	0	0	0	0	-	-
OP_R057	0	0.07	2842	2	2840	1.03	194	2	192	1471	1489	1468	1486	C10	C10
OP_R058	0	0	2842	0	2842	0	194	0	194	0	0	0	0	-	-
OP_R059	0	0	2842	0	2842	0	194	0	194	0	0	0	0	-	-
OP_R060	0	0	2842	0	2842	0	194	0	194	0	0	0	0	-	-
OP_R061	0	84.24	2842	2394	448	97.94	194	190	4	729	749	718	738	C5	C5
OP_R062	0	0.63	2842	18	2824	3.61	194	7	187	1339	1356	1001	1018	V6	V6
OP_R063	0	0	2842	0	2842	0	194	0	194	0	0	0	0	-	-
OP_R064	0	52.6	2842	1495	1347	64.43	194	125	69	452	467	455	470	V3	V3
OP_R065	0	0	2842	0	2842	0	194	0	194	0	0	0	0	-	-
OP_R066	0	0.28	2842	8	2834	1.03	194	2	192	728	748	726	746	C5	C5
OP_R067	0	0.14	2842	4	2838	1.03	194	2	192	850	868	854	871	V5	C6
OP_R068	0	44.16	2842	1255	1587	91.24	194	177	17	1441	1463	1425	1447	C9	V9
OP_R069	0	1.83	2842	52	2790	4.12	194	8	186	450	468	460	478	V3	V3
OP_R070	0	84.52	2842	2402	440	98.97	194	192	2	727	748	716	737	C5	C5
OP_R071	0	0	2842	0	2842	0	194	0	194	0	0	0	0	-	-
OP_R072	0	0	2842	0	2842	0	194	0	194	0	0	0	0	-	-
OP_R073	0	83.22	2842	2365	477	93.3	194	181	13	827	842	815	830	C5	V5
OP_R074	0	0	2842	0	2842	0	194	0	194	0	0	0	0	-	-
OP_R075	0	0	2842	0	2842	0	194	0	194	0	0	0	0	-	-
OP_R076	0	67.98	2842	1932	910	93.3	194	181	13	1434	1452	1420	1438	C9	V9
OP_R077	0	1.02	2842	29	2813	12.37	194	24	170	1470	1487	1488	1505	C10	C10
OP_R078	0	0	2842	0	2842	0	194	0	194	0	0	0	0	-	-
OP_R079	0	0.21	2842	6	2836	0.52	194	1	193	724	745	724	745	C5	C5
OP_R080	0	0	2842	0	2842	0	194	0	194	0	0	0	0	-	-
OP_R081	0	0	2842	0	2842	0	194	0	194	0	0	0	0	-	-
OP_R082	0	20.87	2842	593	2249	28.87	194	56	138	1422	1440	1420	1438	C9	V9
OP_R083	0	0	2842	0	2842	0	194	0	194	0	0	0	0	-	-
OP_R084	0	65.02	2842	1848	994	93.3	194	181	13	1435	1454	1420	1439	C9	V9
OP_R085	0	0	2842	0	2842	0	194	0	194	0	0	0	0	-	-
OP_R086	0	0	2842	0	2842	0	194	0	194	0	0	0	0	-	-
OP_R087	0	73.68	2842	2094	748	96.39	194	187	7	1434	1450	1420	1436	C9	V9
OP_R088	0	0.21	2842	6	2836	0.52	194	1	193	724	746	724	746	C5	C5
OP_R089	0	0.14	2842	4	2838	1.03	194	2	192	848	868	851	871	V5	C6
OP_R090	0	0	2842	0	2842	0	194	0	194	0	0	0	0	-	-
OP_R091	0	0.32	2842	9	2833	2.58	194	5	189	1411	1430	1415	1434	C9	V9
OP_R092	0	0.32	2842	9	2833	1.55	194	3	191	1431	1450	1434	1453	V9	V9
OP_R093	0	0	2842	0	2842	0	194	0	194	0	0	0	0	-	-
OP_R094	0	44.16	2842	1255	1587	91.24	194	177	17	1440	1460	1425	1445	C9	V9
OP_R095	0	18.51	2842	526	2316	28.87	194	56	138	1423	1442	1420	1439	C9	V9
OP_R096	0	0	2842	0	2842	0	194	0	194	0	0	0	0	-	-
OP_R097	0	3.13	2842	89	2753	14.95	194	29	165	1428	1448	1422	1442	C9	V9
OP_R098	0	84.41	2842	2399	443	97.94	194	190	4	729	749	718	738	C5	C5
OP_R099	0	4.86	2842	138	2704	22.68	194	44	150	1426	1446	1420	1440	C9	V9
OP_R100	0	1.83	2842	52	2790	4.12	194	8	186	449	469	459	479	V3	V3
OP_R101	0	0	2842	0	2842	0	194	0	194	0	0	0	0	-	-
OP_R102	0	85.15	2842	2420	422	98.97	194	192	2	459	477	450	468	V3	V3
OP_R103	0	0	2842	0	2842	0	194	0	194	0	0	0	0	-	-
OP_R104	0	0	2842	0	2842	0	194	0	194	0	0	0	0	-	-
OP_R105	0	83.67	2842	2378	464	97.42	194	189	5	1342	1359	1329	1346	C9	C9
OP_R106	0	0	2842	0	2842	0	194	0	194	0	0	0	0	-	-
OP_R107	0	1.02	2842	29	2813	12.37	194	24	170	1470	1487	1488	1505	C10	C10
OP_R108	0	0	2842	0	2842	0	194	0	194	0	0	0	0	-	-
OP_R109	0	1.83	2842	52	2790	4.12	194	8	186	451	468	461	478	V3	V3
OP_R110	0	0	2842	0	2842	0	194	0	194	0	0	0	0	-	-
OP_R111	0	0	2842	0	2842	0	194	0	194	0	0	0	0	-	-
OP_R112	0	0	2842	0	2842	0	194	0	194	0	0	0	0	-	-
OP_R113	0	43.67	2842	1241	1601	91.24	194	177	17	1441	1462	1425	1446	C9	V9
OP_R114	0	0	2842	0	2842	0	194	0	194	0	0	0	0	-	-
OP_R115	0	1.83	2842	52	2790	4.12	194	8	186	452	470	462	480	V3	V3
OP_R116	0	0	2842	0	2842	0	194	0	194	0	0	0	0	-	-
OP_R117	0	0	2842	0	2842	0	194	0	194	0	0	0	0	-	-
OP_R118	0	26.99	2842	767	2075	11.34	194	22	172	975	994	975	994	C6	C6
OP_R119	0	1.79	2842	51	2791	4.64	194	9	185	832	851	715	734	C5	C5
OP_R120	0	84.52	2842	2402	440	98.45	194	191	3	729	749	718	738	C5	C5
OP_R121	0	83.74	2842	2380	462	97.42	194	189	5	1343	1358	1330	1345	C9	C9
OP_R122	0	1.02	2842	29	2813	12.37	194	24	170	1467	1487	1485	1505	C10	C10
OP_R123	0	44.16	2842	1255	1587	91.24	194	177	17	1444	1463	1428	1447	C9	V9
OP_R124	0	0	2842	0	2842	0	194	0	194	0	0	0	0	-	-
OP_R125	0	0	2842	0	2842	0	194	0	194	0	0	0	0	-	-
OP_R126	0	0	2842	0	2842	0	194	0	194	0	0	0	0	-	-
OP_R127	0	0	2842	0	2842	0	194	0	194	0	0	0	0	-	-
OP_R128	0	0	2842	0	2842	0	194	0	194	0	0	0	0	-	-
OP_R129	0	0	2842	0	2842	0	194	0	194	0	0	0	0	-	-
OP_R130	0	0	2842	0	2842	0	194	0	194	0	0	0	0	-	-
OP_R131	0	0	2842	0	2842	0	194	0	194	0	0	0	0	-	-
OP_R132	0	0	2842	0	2842	0	194	0	194	0	0	0	0	-	-
OP_R133	0	0	2842	0	2842	0	194	0	194	0	0	0	0	-	-
OP_R134	0	0	2842	0	2842	0	194	0	194	0	0	0	0	-	-
OP_R135	0	0	2842	0	2842	0	194	0	194	0	0	0	0	-	-
OP_R136	0	0.99	2842	28	2814	11.86	194	23	171	1468	1488	1485	1505	C10	C10
OP_R137	0	2.22	2842	63	2779	11.34	194	22	172	1560	1579	1405	1424	C9	C9
OP_R138	0	0	2842	0	2842	0	194	0	194	0	0	0	0	-	-
OP_R139	0	0	2842	0	2842	0	194	0	194	0	0	0	0	-	-
OP_R140	0	4.15	2842	118	2724	18.04	194	35	159	1426	1447	1420	1441	C9	V9
OP_R141	0	0	2842	0	2842	0	194	0	194	0	0	0	0	-	-
OP_R142	0	0	2842	0	2842	0	194	0	194	0	0	0	0	-	-
OP_R143	0	0	2842	0	2842	0	194	0	194	0	0	0	0	-	-
OP_R144	0	83.6	2842	2376	466	96.91	194	188	6	1342	1359	1329	1346	C9	C9
OP_R145	0	0.04	2842	1	2841	0.52	194	1	193	1424	1444	1424	1444	C9	V9
OP_R146	0	3.24	2842	92	2750	9.79	194	19	175	447	462	444	459	V3	V3
OP_R147	0	0	2842	0	2842	0	194	0	194	0	0	0	0	-	-
OP_R148	0	18.79	2842	534	2308	43.81	194	85	109	851	867	826	842	C5	V5

## Sheet: Unidentified_F
Primer_identifier	Mismatches	Variant_Coverage(%)	Analyzed_genes	Covered_genes	Non_covered_genes	Species_Coverage(%)	Analyzed_species	Covered_species	Non_covered_species	P_Mean_IP	P_Mean_EP	P_Mode_IP	P_Mode_EP	16S_Region_Mode_IP	16S_Region_Mode_EP
OP_UI001	0	0	2842	0	2842	0	194	0	194	0	0	0	0	-	-
OP_UI002	0	7.28	2842	207	2635	32.99	194	64	130	12	31	1	20	C1	C1
OP_UI003	0	0	2842	0	2842	0	194	0	194	0	0	0	0	-	-
OP_UI004	0	0	2842	0	2842	0	194	0	194	0	0	0	0	-	-
OP_UI005	0	0	2842	0	2842	0	194	0	194	0	0	0	0	-	-
OP_UI006	0	1.83	2842	52	2790	4.12	194	8	186	452	470	462	480	V3	V3
OP_UI007	0	0	2842	0	2842	0	194	0	194	0	0	0	0	-	-
OP_UI008	0	13.72	2842	390	2452	76.8	194	149	45	98	113	106	121	C2	C2
OP_UI009	0	0	2842	0	2842	0	194	0	194	0	0	0	0	-	-
OP_UI010	0	0	2842	0	2842	0	194	0	194	0	0	0	0	-	-
OP_UI011	0	0	2842	0	2842	0	194	0	194	0	0	0	0	-	-
OP_UI012	0	0	2842	0	2842	0	194	0	194	0	0	0	0	-	-

## Sheet: Unidentified_R
Primer_identifier	Mismatches	Variant_Coverage(%)	Analyzed_genes	Covered_genes	Non_covered_genes	Species_Coverage(%)	Analyzed_species	Covered_species	Non_covered_species	P_Mean_IP	P_Mean_EP	P_Mode_IP	P_Mode_EP	16S_Region_Mode_IP	16S_Region_Mode_EP
OP_UI001	0	0	2842	0	2842	0	194	0	194	0	0	0	0	-	-
OP_UI002	0	44.16	2842	1255	1587	91.24	194	177	17	1444	1463	1428	1447	C9	V9
OP_UI003	0	0	2842	0	2842	0	194	0	194	0	0	0	0	-	-
OP_UI004	0	0	2842	0	2842	0	194	0	194	0	0	0	0	-	-
OP_UI005	0	0	2842	0	2842	0	194	0	194	0	0	0	0	-	-
OP_UI006	0	0.67	2842	19	2823	3.61	194	7	187	983	1001	974	992	C6	C6
OP_UI007	0	0	2842	0	2842	0	194	0	194	0	0	0	0	-	-
OP_UI008	0	83.67	2842	2378	464	96.91	194	188	6	1343	1358	1330	1345	C9	C9
OP_UI009	0	0	2842	0	2842	0	194	0	194	0	0	0	0	-	-
OP_UI010	0	0	2842	0	2842	0	194	0	194	0	0	0	0	-	-
OP_UI011	0	0	2842	0	2842	0	194	0	194	0	0	0	0	-	-
OP_UI012	0	0	2842	0	2842	0	194	0	194	0	0	0	0	-	-
