# Supplementary material for: In-Silico Evaluation and Selection of the Best 16S rRNA Gene Primers for Use in Next-Generation Sequencing to Detect Oral Bacteria and Archaea.
Source: Research Square preprint supplement (doi:10.21203/rs.3.rs-516961/v1), 2021-05-24
Supplement: Supplementary file 3 [file 697a8672271829d9fc53fd82.xlsx]

## Sheet: Title. Abreviatures
Additional table 38. Primer pairs utilised in the reviewed oral microbiome studies through 16S rRNA gene sequencing
F_P	Forward primer
R_P	Reverse primer
PP	Primer pair

## Sheet: PP_Oral_Studies
PMID	Authors_year	16S_Region_or_positions	F_P_Sequence	F_P_Identifier	Times_Repeated	R_P_Sequence	R_P_Identifier	Times_Repeated	F_R_Sequences_joined	PP_Identifier	Times_Repeated
28704437	Lai et al. 2017	V4	GTGCCAGCMGCCGCGGTAA	KP_F078	39	GGACTACHVGGGTWTCTAAT	OP_R010	54	GTGCCAGCMGCCGCGGTAA--GGACTACHVGGGTWTCTAAT	KP_F078-OP_R010	33
30262598	Vogtmann et al. 2019	V4 (515F - 806R)	GTGCCAGCMGCCGCGGTAA	KP_F078	39	GGACTACHVGGGTWTCTAAT	OP_R010	54	GTGCCAGCMGCCGCGGTAA--GGACTACHVGGGTWTCTAAT	KP_F078-OP_R010	33
31750624	Vogtmann et al. 2020	515F-806R	GTGCCAGCMGCCGCGGTAA	KP_F078	39	GGACTACHVGGGTWTCTAAT	OP_R010	54	GTGCCAGCMGCCGCGGTAA--GGACTACHVGGGTWTCTAAT	KP_F078-OP_R010	33
28320468	Correa et al. 2017	515F-806R	GTGCCAGCMGCCGCGGTAA	KP_F078	39	GGACTACHVGGGTWTCTAAT	OP_R010	54	GTGCCAGCMGCCGCGGTAA--GGACTACHVGGGTWTCTAAT	KP_F078-OP_R010	33
29900345	Gloor et al. 2018	V4	GTGCCAGCMGCCGCGGTAA	KP_F078	39	GGACTACHVGGGTWTCTAAT	OP_R010	54	GTGCCAGCMGCCGCGGTAA--GGACTACHVGGGTWTCTAAT	KP_F078-OP_R010	33
31714477	Young et al. 2020	V4 (515F - 806R)	GTGCCAGCMGCCGCGGTAA	KP_F078	39	GGACTACHVGGGTWTCTAAT	OP_R010	54	GTGCCAGCMGCCGCGGTAA--GGACTACHVGGGTWTCTAAT	KP_F078-OP_R010	33
29984544	Kazachkov et al. 2018	V4 (515F - 806R)	GTGCCAGCMGCCGCGGTAA	KP_F078	39	GGACTACHVGGGTWTCTAAT	OP_R010	54	GTGCCAGCMGCCGCGGTAA--GGACTACHVGGGTWTCTAAT	KP_F078-OP_R010	33
29885665	Durack et al. 2018	V4 (515F - 806R)	GTGCCAGCMGCCGCGGTAA	KP_F078	39	GGACTACHVGGGTWTCTAAT	OP_R010	54	GTGCCAGCMGCCGCGGTAA--GGACTACHVGGGTWTCTAAT	KP_F078-OP_R010	33
29362114	Yang et al. 2019	V4 (515F - 806R)	GTGCCAGCMGCCGCGGTAA	KP_F078	39	GGACTACHVGGGTWTCTAAT	OP_R010	54	GTGCCAGCMGCCGCGGTAA--GGACTACHVGGGTWTCTAAT	KP_F078-OP_R010	33
26627545	Denner et al. 2016	V4 (338F - 806R)	GTGCCAGCMGCCGCGGTAA	KP_F078	39	GGACTACHVGGGTWTCTAAT	OP_R010	54	GTGCCAGCMGCCGCGGTAA--GGACTACHVGGGTWTCTAAT	KP_F078-OP_R010	33
29736335	Steewart et al. 2018	V4 (515F - 806R)	GTGCCAGCMGCCGCGGTAA	KP_F078	39	GGACTACHVGGGTWTCTAAT	OP_R010	54	GTGCCAGCMGCCGCGGTAA--GGACTACHVGGGTWTCTAAT	KP_F078-OP_R010	33
29184122	Lee et al. 2017	V4 (515F-806R)	GTGCCAGCMGCCGCGGTAA	KP_F078	39	GGACTACHVGGGTWTCTAAT	OP_R010	54	GTGCCAGCMGCCGCGGTAA--GGACTACHVGGGTWTCTAAT	KP_F078-OP_R010	33
29228609	Mukherjee et al. 2017	V4 (515F-806R)	GTGCCAGCMGCCGCGGTAA	KP_F078	39	GGACTACHVGGGTWTCTAAT	OP_R010	54	GTGCCAGCMGCCGCGGTAA--GGACTACHVGGGTWTCTAAT	KP_F078-OP_R010	33
28725009	Wolf et al. 2017	V4 (515F-806R)	GTGCCAGCMGCCGCGGTAA	KP_F078	39	GGACTACHVGGGTWTCTAAT	OP_R010	54	GTGCCAGCMGCCGCGGTAA--GGACTACHVGGGTWTCTAAT	KP_F078-OP_R010	33
30060225	Van der Meulen et al. 2018	V4 (515F-806R)	GTGCCAGCMGCCGCGGTAA	KP_F078	39	GGACTACHVGGGTWTCTAAT	OP_R010	54	GTGCCAGCMGCCGCGGTAA--GGACTACHVGGGTWTCTAAT	KP_F078-OP_R010	33
27135405	Rocas et al. 2016	V4 (515F-806R)	GTGCCAGCMGCCGCGGTAA	KP_F078	39	GGACTACHVGGGTWTCTAAT	OP_R010	54	GTGCCAGCMGCCGCGGTAA--GGACTACHVGGGTWTCTAAT	KP_F078-OP_R010	33
26518358	Rasmussen et al. 2016	V4 (515F-806R)	GTGCCAGCMGCCGCGGTAA	KP_F078	39	GGACTACHVGGGTWTCTAAT	OP_R010	54	GTGCCAGCMGCCGCGGTAA--GGACTACHVGGGTWTCTAAT	KP_F078-OP_R010	33
27689802	Siqueira et al. 2016	V4 (515F-806R)	GTGCCAGCMGCCGCGGTAA	KP_F078	39	GGACTACHVGGGTWTCTAAT	OP_R010	54	GTGCCAGCMGCCGCGGTAA--GGACTACHVGGGTWTCTAAT	KP_F078-OP_R010	33
26662044	Reilly et al. 2016	V4 (515F-806R)	GTGCCAGCMGCCGCGGTAA	KP_F078	39	GGACTACHVGGGTWTCTAAT	OP_R010	54	GTGCCAGCMGCCGCGGTAA--GGACTACHVGGGTWTCTAAT	KP_F078-OP_R010	33
30231060	Beyer et al. 2018	V4 (515F-806R)	GTGCCAGCMGCCGCGGTAA	KP_F078	39	GGACTACHVGGGTWTCTAAT	OP_R010	54	GTGCCAGCMGCCGCGGTAA--GGACTACHVGGGTWTCTAAT	KP_F078-OP_R010	33
27732961	Han et al. 2017	V4 (515F-806R)	GTGCCAGCMGCCGCGGTAA	KP_F078	39	GGACTACHVGGGTWTCTAAT	OP_R010	54	GTGCCAGCMGCCGCGGTAA--GGACTACHVGGGTWTCTAAT	KP_F078-OP_R010	33
31107724	Hiremath et al. 2019	V4	GTGCCAGCMGCCGCGGTAA	KP_F078	39	GGACTACHVGGGTWTCTAAT	OP_R010	54	GTGCCAGCMGCCGCGGTAA--GGACTACHVGGGTWTCTAAT	KP_F078-OP_R010	33
31076212	Beghini et al. 2019	V4	GTGCCAGCMGCCGCGGTAA	KP_F078	39	GGACTACHVGGGTWTCTAAT	OP_R010	54	GTGCCAGCMGCCGCGGTAA--GGACTACHVGGGTWTCTAAT	KP_F078-OP_R010	33
28993578	Ogawa et al. 2017	V4	GTGCCAGCMGCCGCGGTAA	KP_F078	39	GGACTACHVGGGTWTCTAAT	OP_R010	54	GTGCCAGCMGCCGCGGTAA--GGACTACHVGGGTWTCTAAT	KP_F078-OP_R010	33
27104353	Yamagishi et al. 2016	V4	GTGCCAGCMGCCGCGGTAA	KP_F078	39	GGACTACHVGGGTWTCTAAT	OP_R010	54	GTGCCAGCMGCCGCGGTAA--GGACTACHVGGGTWTCTAAT	KP_F078-OP_R010	33
27065347	Mougeot et al. 2017	V3-V4	GTGCCAGCMGCCGCGGTAA	KP_F078	39	GGACTACHVGGGTWTCTAAT	OP_R010	54	GTGCCAGCMGCCGCGGTAA--GGACTACHVGGGTWTCTAAT	KP_F078-OP_R010	33
32123200	Rullo et al. 2020	V4 (515F-806R)	GTGCCAGCMGCCGCGGTAA	KP_F078	39	GGACTACHVGGGTWTCTAAT	OP_R010	54	GTGCCAGCMGCCGCGGTAA--GGACTACHVGGGTWTCTAAT	KP_F078-OP_R010	33
31775777	Yang et al. 2019	V4 (515F-806R)	GTGCCAGCMGCCGCGGTAA	KP_F078	39	GGACTACHVGGGTWTCTAAT	OP_R010	54	GTGCCAGCMGCCGCGGTAA--GGACTACHVGGGTWTCTAAT	KP_F078-OP_R010	33
24465618	Piombino et al. 2014	V4 (515F-806R)	GTGCCAGCMGCCGCGGTAA	KP_F078	39	GGACTACHVGGGTWTCTAAT	OP_R010	54	GTGCCAGCMGCCGCGGTAA--GGACTACHVGGGTWTCTAAT	KP_F078-OP_R010	33
26368937	O'Donnell et al. 2015	V4 (515F-806R)	GTGCCAGCMGCCGCGGTAA	KP_F078	39	GGACTACHVGGGTWTCTAAT	OP_R010	54	GTGCCAGCMGCCGCGGTAA--GGACTACHVGGGTWTCTAAT	KP_F078-OP_R010	33
28871594	Pérez-Chaparro et al. 2018	514F - 806R	GTGCCAGCMGCCGCGGTAA	KP_F078	39	GGACTACHVGGGTWTCTAAT	OP_R010	54	GTGCCAGCMGCCGCGGTAA--GGACTACHVGGGTWTCTAAT	KP_F078-OP_R010	33
28273061	Weyrich et al. 2017	V4 (515F-806R)	GTGCCAGCMGCCGCGGTAA	KP_F078	39	GGACTACHVGGGTWTCTAAT	OP_R010	54	GTGCCAGCMGCCGCGGTAA--GGACTACHVGGGTWTCTAAT	KP_F078-OP_R010	33
25028427	Shade et al. 2014	V4 (515F-806R)	GTGCCAGCMGCCGCGGTAA	KP_F078	39	GGACTACHVGGGTWTCTAAT	OP_R010	54	GTGCCAGCMGCCGCGGTAA--GGACTACHVGGGTWTCTAAT	KP_F078-OP_R010	33
26437933	Zheng et al. 2015	V3 (341F)-V4 (805R)	CCTACGGGNGGCWGCAG	KP_F047	27	GACTACHVGGGTATCTAATCC	KP_R035	22	CCTACGGGNGGCWGCAG--GACTACHVGGGTATCTAATCC	KP_F047-KP_R035	21
26207044	Cameron et al. 2015	319F - 806 R	CCTACGGGNGGCWGCAG	KP_F047	27	GACTACHVGGGTATCTAATCC	KP_R035	22	CCTACGGGNGGCWGCAG--GACTACHVGGGTATCTAATCC	KP_F047-KP_R035	21
27107811	Lazarevic et al. 2016	V3 (341F) - V4 (805R)	CCTACGGGNGGCWGCAG	KP_F047	27	GACTACHVGGGTATCTAATCC	KP_R035	22	CCTACGGGNGGCWGCAG--GACTACHVGGGTATCTAATCC	KP_F047-KP_R035	21
27797671	Kato et al. 2017	V3 (S-D-Bact-0341-b-S-17) - V4 (S-D-Bact-0785-a-A-21)	CCTACGGGNGGCWGCAG	KP_F047	27	GACTACHVGGGTATCTAATCC	KP_R035	22	CCTACGGGNGGCWGCAG--GACTACHVGGGTATCTAATCC	KP_F047-KP_R035	21
31514257	Sharma et al. 2020	-	CCTACGGGNGGCWGCAG	KP_F047	27	GACTACHVGGGTATCTAATCC	KP_R035	22	CCTACGGGNGGCWGCAG--GACTACHVGGGTATCTAATCC	KP_F047-KP_R035	21
32497654	Nardello et al. 2020	V4 (Bakt341F) - V5 (Bakt805R)	CCTACGGGNGGCWGCAG	KP_F047	27	GACTACHVGGGTATCTAATCC	KP_R035	22	CCTACGGGNGGCWGCAG--GACTACHVGGGTATCTAATCC	KP_F047-KP_R035	21
30875283	Topcuoglu et al. 2019	V3 (Bakt_341F) - V4 (Bakt_805R)	CCTACGGGNGGCWGCAG	KP_F047	27	GACTACHVGGGTATCTAATCC	KP_R035	22	CCTACGGGNGGCWGCAG--GACTACHVGGGTATCTAATCC	KP_F047-KP_R035	21
31945133	Marangoni et al. 2020	V3-V4	CCTACGGGNGGCWGCAG	KP_F047	27	GACTACHVGGGTATCTAATCC	KP_R035	22	CCTACGGGNGGCWGCAG--GACTACHVGGGTATCTAATCC	KP_F047-KP_R035	21
31109865	Takahashi et al. 2019		CCTACGGGNGGCWGCAG	KP_F047	27	GACTACHVGGGTATCTAATCC	KP_R035	22	CCTACGGGNGGCWGCAG--GACTACHVGGGTATCTAATCC	KP_F047-KP_R035	21
29668720	Hagenfeld et al. 2018	V3F - V4R	CCTACGGGNGGCWGCAG	KP_F047	27	GACTACHVGGGTATCTAATCC	KP_R035	22	CCTACGGGNGGCWGCAG--GACTACHVGGGTATCTAATCC	KP_F047-KP_R035	21
31024514	Raju et al. 2019	V3 (S-D-Bact-0341-b-S-17) - V4 (S-D-Bact-0785-a-A-21)	CCTACGGGNGGCWGCAG	KP_F047	27	GACTACHVGGGTATCTAATCC	KP_R035	22	CCTACGGGNGGCWGCAG--GACTACHVGGGTATCTAATCC	KP_F047-KP_R035	21
29774014	Yang et al. 2018	V3-V4	CCTACGGGNGGCWGCAG	KP_F047	27	GACTACHVGGGTATCTAATCC	KP_R035	22	CCTACGGGNGGCWGCAG--GACTACHVGGGTATCTAATCC	KP_F047-KP_R035	21
31056339	Li et al. 2019	V3-V4	CCTACGGGNGGCWGCAG	KP_F047	27	GACTACHVGGGTATCTAATCC	KP_R035	22	CCTACGGGNGGCWGCAG--GACTACHVGGGTATCTAATCC	KP_F047-KP_R035	21
31810597	Li et al. 2020	V3-V4	CCTACGGGNGGCWGCAG	KP_F047	27	GACTACHVGGGTATCTAATCC	KP_R035	22	CCTACGGGNGGCWGCAG--GACTACHVGGGTATCTAATCC	KP_F047-KP_R035	21
32390990	Viljakainen et al. 2020	V3 (S-D-Bact-0341-b-S-17) - V4 (S-D-Bact-0785-a-A-21)	CCTACGGGNGGCWGCAG	KP_F047	27	GACTACHVGGGTATCTAATCC	KP_R035	22	CCTACGGGNGGCWGCAG--GACTACHVGGGTATCTAATCC	KP_F047-KP_R035	21
28260061	Coretti et al. 2017	V3 - V4	CCTACGGGNGGCWGCAG	KP_F047	27	GACTACHVGGGTATCTAATCC	KP_R035	22	CCTACGGGNGGCWGCAG--GACTACHVGGGTATCTAATCC	KP_F047-KP_R035	21
30470868	Chang et al. 2019	V3 (341F) - V4 (806R)	CCTACGGGNGGCWGCAG	KP_F047	27	GACTACHVGGGTATCTAATCC	KP_R035	22	CCTACGGGNGGCWGCAG--GACTACHVGGGTATCTAATCC	KP_F047-KP_R035	21
31832691	Panda et al. 2020	V3-V4	CCTACGGGNGGCWGCAG	KP_F047	27	GACTACHVGGGTATCTAATCC	KP_R035	22	CCTACGGGNGGCWGCAG--GACTACHVGGGTATCTAATCC	KP_F047-KP_R035	21
30710838	Schulz et al. 2019	V3 - V4	CCTACGGGNGGCWGCAG	KP_F047	27	GACTACHVGGGTATCTAATCC	KP_R035	22	CCTACGGGNGGCWGCAG--GACTACHVGGGTATCTAATCC	KP_F047-KP_R035	21
31234808	Li et al. 2019	V3 (341F) - V4 (806R)	CCTACGGGNGGCWGCAG	KP_F047	27	GACTACHVGGGTATCTAATCC	KP_R035	22	CCTACGGGNGGCWGCAG--GACTACHVGGGTATCTAATCC	KP_F047-KP_R035	21
28875948	Seerangaiyan et al. 2017	V3 - V4	CCTACGGGNGGCWGCAG	KP_F047	27	GACTACHVGGGTATCTAATCC	KP_R035	22	CCTACGGGNGGCWGCAG--GACTACHVGGGTATCTAATCC	KP_F047-KP_R035	21
17172525	Vickerman et al. 2007	-	TCCAGGCCCTACGGG	KP_F014	10	YCCGGCGTTGAMTCCAATT	KP_R011	8	TCCAGGCCCTACGGG--YCCGGCGTTGAMTCCAATT	KP_F014-KP_R011	8
18707623	Yamabé et al. 2008	-	TCCAGGCCCTACGGG	KP_F014	10	YCCGGCGTTGAMTCCAATT	KP_R011	8	TCCAGGCCCTACGGG--YCCGGCGTTGAMTCCAATT	KP_F014-KP_R011	8
27166431	Huynh et al. 2016	SDArch0333aS15 - SDArch0958aA19	TCCAGGCCCTACGGG	KP_F014	10	YCCGGCGTTGAMTCCAATT	KP_R011	8	TCCAGGCCCTACGGG--YCCGGCGTTGAMTCCAATT	KP_F014-KP_R011	8
19572899	Li et al. 2009	SDArch0333aS15 - SD-Arch0958aA19	TCCAGGCCCTACGGG	KP_F014	10	YCCGGCGTTGAMTCCAATT	KP_R011	8	TCCAGGCCCTACGGG--YCCGGCGTTGAMTCCAATT	KP_F014-KP_R011	8
15067114	Lepp et al. 2004	SDArch0333aS15 - SDArch0958aA19	TCCAGGCCCTACGGG	KP_F014	10	YCCGGCGTTGAMTCCAATT	KP_R011	8	TCCAGGCCCTACGGG--YCCGGCGTTGAMTCCAATT	KP_F014-KP_R011	8
31666044	Sogodogo et al. 2019	SDArch0333aS15 - SDArch0958aA19	TCCAGGCCCTACGGG	KP_F014	10	YCCGGCGTTGAMTCCAATT	KP_R011	8	TCCAGGCCCTACGGG--YCCGGCGTTGAMTCCAATT	KP_F014-KP_R011	8
29907776	Grine et al. 2018	SDArch0333aS15 - SDArch0958aA19	TCCAGGCCCTACGGG	KP_F014	10	YCCGGCGTTGAMTCCAATT	KP_R011	8	TCCAGGCCCTACGGG--YCCGGCGTTGAMTCCAATT	KP_F014-KP_R011	8
25708582	Nkamga et al. 2015	SDArch0333aS15 - SDArch0958aA19	TCCAGGCCCTACGGG	KP_F014	10	YCCGGCGTTGAMTCCAATT	KP_R011	8	TCCAGGCCCTACGGG--YCCGGCGTTGAMTCCAATT	KP_F014-KP_R011	8
22613548	Zhang et al. 2012	27F - 1492R	AGAGTTTGATCMTGGCTCAG	KP_F034	35	TACGGYTACCTTGTTACGACTT	KP_R065	11	AGAGTTTGATCMTGGCTCAG--TACGGYTACCTTGTTACGACTT	KP_F034-KP_R065	8
23981622	Shang et al. 2013	27F - 1492R	AGAGTTTGATCMTGGCTCAG	KP_F034	35	TACGGYTACCTTGTTACGACTT	KP_R065	11	AGAGTTTGATCMTGGCTCAG--TACGGYTACCTTGTTACGACTT	KP_F034-KP_R065	8
16390343	Lillo et al. 2006	27F-1492R	AGAGTTTGATCMTGGCTCAG	KP_F034	35	TACGGYTACCTTGTTACGACTT	KP_R065	11	AGAGTTTGATCMTGGCTCAG--TACGGYTACCTTGTTACGACTT	KP_F034-KP_R065	8
15815015	Ciantar et al. 2011	27F - 1492R	AGAGTTTGATCMTGGCTCAG	KP_F034	35	TACGGYTACCTTGTTACGACTT	KP_R065	11	AGAGTTTGATCMTGGCTCAG--TACGGYTACCTTGTTACGACTT	KP_F034-KP_R065	8
12588458	Pratten et al. 2003	27F - 1492R	AGAGTTTGATCMTGGCTCAG	KP_F034	35	TACGGYTACCTTGTTACGACTT	KP_R065	11	AGAGTTTGATCMTGGCTCAG--TACGGYTACCTTGTTACGACTT	KP_F034-KP_R065	8
11526164	Rolph et al. 2001	27F - 1492R	AGAGTTTGATCMTGGCTCAG	KP_F034	35	TACGGYTACCTTGTTACGACTT	KP_R065	11	AGAGTTTGATCMTGGCTCAG--TACGGYTACCTTGTTACGACTT	KP_F034-KP_R065	8
25463904	Kim et al. 2015	27F - 1492R	AGAGTTTGATCMTGGCTCAG	KP_F034	35	TACGGYTACCTTGTTACGACTT	KP_R065	11	AGAGTTTGATCMTGGCTCAG--TACGGYTACCTTGTTACGACTT	KP_F034-KP_R065	8
11837293	Nakazawa et al. 2002	8-27 - 1492-1513	AGAGTTTGATCMTGGCTCAG	KP_F034	35	TACGGYTACCTTGTTACGACTT	KP_R065	11	AGAGTTTGATCMTGGCTCAG--TACGGYTACCTTGTTACGACTT	KP_F034-KP_R065	8
23437114	Hu et al. 2013	V1 (8F) - V3 (533R)	AGAGTTTGATCCTGGCTCAG	KP_F031	44	TTACCGCGGCTGCTGGCAC	KP_R021	7	AGAGTTTGATCCTGGCTCAG--TTACCGCGGCTGCTGGCAC	KP_F031-KP_R021	7
23613868	Zhou et al. 2013	V1 (8F) - V3 (533R)	AGAGTTTGATCCTGGCTCAG	KP_F031	44	TTACCGCGGCTGCTGGCAC	KP_R021	7	AGAGTTTGATCCTGGCTCAG--TTACCGCGGCTGCTGGCAC	KP_F031-KP_R021	7
26412568	Li et al. 2015	V1 (27F) - V3 (534R)	AGAGTTTGATCCTGGCTCAG	KP_F031	44	TTACCGCGGCTGCTGGCAC	KP_R021	7	AGAGTTTGATCCTGGCTCAG--TTACCGCGGCTGCTGGCAC	KP_F031-KP_R021	7
24586647	Xu et al. 2014	V1 (27F) - V3 (534R)	AGAGTTTGATCCTGGCTCAG	KP_F031	44	TTACCGCGGCTGCTGGCAC	KP_R021	7	AGAGTTTGATCCTGGCTCAG--TTACCGCGGCTGCTGGCAC	KP_F031-KP_R021	7
30176961	Xu et al. 2018	V1-V3	AGAGTTTGATCCTGGCTCAG	KP_F031	44	TTACCGCGGCTGCTGGCAC	KP_R021	7	AGAGTTTGATCCTGGCTCAG--TTACCGCGGCTGCTGGCAC	KP_F031-KP_R021	7
23743597	Jiang et al. 2013	V1 (8F) - V3 (533R)	AGAGTTTGATCCTGGCTCAG	KP_F031	44	TTACCGCGGCTGCTGGCAC	KP_R021	7	AGAGTTTGATCCTGGCTCAG--TTACCGCGGCTGCTGGCAC	KP_F031-KP_R021	7
24504329	Jiang et al. 2014	V1 (27F) - V3 (533R)	AGAGTTTGATCCTGGCTCAG	KP_F031	44	TTACCGCGGCTGCTGGCAC	KP_R021	7	AGAGTTTGATCCTGGCTCAG--TTACCGCGGCTGCTGGCAC	KP_F031-KP_R021	7
26556275	Zaura et al. 2015	V5 (785F) - V7 (1175R)	GGATTAGATACCCBRGTAGTC	OP_F009	12	ACGTCRTCCCCDCCTTCCTC	OP_R029	7	GGATTAGATACCCBRGTAGTC--ACGTCRTCCCCDCCTTCCTC	OP_F009-OP_R029	7
22900048	Kraneveld et al. 2012	785F - 1175R	GGATTAGATACCCBRGTAGTC	OP_F009	12	ACGTCRTCCCCDCCTTCCTC	OP_R029	7	GGATTAGATACCCBRGTAGTC--ACGTCRTCCCCDCCTTCCTC	OP_F009-OP_R029	7
27170047	Sousa et al. 2017	V5 (785F) - V7 (1175R)	GGATTAGATACCCBRGTAGTC	OP_F009	12	ACGTCRTCCCCDCCTTCCTC	OP_R029	7	GGATTAGATACCCBRGTAGTC--ACGTCRTCCCCDCCTTCCTC	OP_F009-OP_R029	7
27520811	Shaw et al. 2016	V5 (785F) - V7 (1175R)	GGATTAGATACCCBRGTAGTC	OP_F009	12	ACGTCRTCCCCDCCTTCCTC	OP_R029	7	GGATTAGATACCCBRGTAGTC--ACGTCRTCCCCDCCTTCCTC	OP_F009-OP_R029	7
24135296	Van der Horst et al. 2013	V5 (785F) - V7 (1175R)	GGATTAGATACCCBRGTAGTC	OP_F009	12	ACGTCRTCCCCDCCTTCCTC	OP_R029	7	GGATTAGATACCCBRGTAGTC--ACGTCRTCCCCDCCTTCCTC	OP_F009-OP_R029	7
22962346	Bonder et al. 2012	V5 (785F) - V7 (1175R)	GGATTAGATACCCBRGTAGTC	OP_F009	12	ACGTCRTCCCCDCCTTCCTC	OP_R029	7	GGATTAGATACCCBRGTAGTC--ACGTCRTCCCCDCCTTCCTC	OP_F009-OP_R029	7
23489056	Bizzarro et al. 2013	V5 (785F) - V7 (1175R)	GGATTAGATACCCBRGTAGTC	OP_F009	12	ACGTCRTCCCCDCCTTCCTC	OP_R029	7	GGATTAGATACCCBRGTAGTC--ACGTCRTCCCCDCCTTCCTC	OP_F009-OP_R029	7
29576948	Wu et al. 2018	V3 (338F) - V4 (806R)	ACTCCTACGGGAGGCAGCA	OP_F048	6	GGACTACHVGGGTWTCTAAT	OP_R010	54	ACTCCTACGGGAGGCAGCA--GGACTACHVGGGTWTCTAAT	OP_F048-OP_R010	6
30967114	Qian et al. 2019	V3 (338F) - V4 (802R)	ACTCCTACGGGAGGCAGCA	OP_F048	6	GGACTACHVGGGTWTCTAAT	OP_R010	54	ACTCCTACGGGAGGCAGCA--GGACTACHVGGGTWTCTAAT	OP_F048-OP_R010	6
31218867	Liu et al. 2019	V3 (338F) - V4 (806R)	ACTCCTACGGGAGGCAGCA	OP_F048	6	GGACTACHVGGGTWTCTAAT	OP_R010	54	ACTCCTACGGGAGGCAGCA--GGACTACHVGGGTWTCTAAT	OP_F048-OP_R010	6
32197614	Ji et al. 2020	V3 (338F) - V4 (806R)	ACTCCTACGGGAGGCAGCA	OP_F048	6	GGACTACHVGGGTWTCTAAT	OP_R010	54	ACTCCTACGGGAGGCAGCA--GGACTACHVGGGTWTCTAAT	OP_F048-OP_R010	6
27035407	Han et al. 2016	V2 (338F) - V4 (806R)	ACTCCTACGGGAGGCAGCA	OP_F048	6	GGACTACHVGGGTWTCTAAT	OP_R010	54	ACTCCTACGGGAGGCAGCA--GGACTACHVGGGTWTCTAAT	OP_F048-OP_R010	6
25281933	Han et al. 2014	V2–V4 (338F–806R)	ACTCCTACGGGAGGCAGCA	OP_F048	6	GGACTACHVGGGTWTCTAAT	OP_R010	54	ACTCCTACGGGAGGCAGCA--GGACTACHVGGGTWTCTAAT	OP_F048-OP_R010	6
29316977	Pragman et al. 2018	V3 (341F-518R)	CCTACGGGAGGCAGCAG	KP_F046	17	ATTACCGCGGCTGCTGG	KP_R023	20	CCTACGGGAGGCAGCAG--ATTACCGCGGCTGCTGG	KP_F046-KP_R023	6
31126003	Li et al. 2019	V3	CCTACGGGAGGCAGCAG	KP_F046	17	ATTACCGCGGCTGCTGG	KP_R023	20	CCTACGGGAGGCAGCAG--ATTACCGCGGCTGCTGG	KP_F046-KP_R023	6
23758874	Ling et al. 2013	V3 (341F - 534R)	CCTACGGGAGGCAGCAG	KP_F046	17	ATTACCGCGGCTGCTGG	KP_R023	20	CCTACGGGAGGCAGCAG--ATTACCGCGGCTGCTGG	KP_F046-KP_R023	6
30096429	Sun et al. 2018	V3	CCTACGGGAGGCAGCAG	KP_F046	17	ATTACCGCGGCTGCTGG	KP_R023	20	CCTACGGGAGGCAGCAG--ATTACCGCGGCTGCTGG	KP_F046-KP_R023	6
28199766	He et al. 2017	V3 (338F - 518R)	CCTACGGGAGGCAGCAG	KP_F046	17	ATTACCGCGGCTGCTGG	KP_R023	20	CCTACGGGAGGCAGCAG--ATTACCGCGGCTGCTGG	KP_F046-KP_R023	6
22998923	Cockburn et al. 2012	V3 (341F - 518R)	CCTACGGGAGGCAGCAG	KP_F046	17	ATTACCGCGGCTGCTGG	KP_R023	20	CCTACGGGAGGCAGCAG--ATTACCGCGGCTGCTGG	KP_F046-KP_R023	6
23071716	Conlan et al. 2012	V3 (512F) - V5 (926R)	CCTACGGGAGGCAGCAG	KP_F046	17	CCGTCAATTCMTTTRAGT	OP_R052	6	CCTACGGGAGGCAGCAG--CCGTCAATTCMTTTRAGT	KP_F046-OP_R052	6
25736890	Bassis et al. 2015	V3 (375F) - V5 (926R)	CCTACGGGAGGCAGCAG	KP_F046	17	CCGTCAATTCMTTTRAGT	OP_R052	6	CCTACGGGAGGCAGCAG--CCGTCAATTCMTTTRAGT	KP_F046-OP_R052	6
31003081	Diez López et al. 2019	V3 (F357) - V5 (R926)	CCTACGGGAGGCAGCAG	KP_F046	17	CCGTCAATTCMTTTRAGT	OP_R052	6	CCTACGGGAGGCAGCAG--CCGTCAATTCMTTTRAGT	KP_F046-OP_R052	6
26418220	Morou-Bermúdez et al. 2015	V3 (357F) - V5 (926R)	CCTACGGGAGGCAGCAG	KP_F046	17	CCGTCAATTCMTTTRAGT	OP_R052	6	CCTACGGGAGGCAGCAG--CCGTCAATTCMTTTRAGT	KP_F046-OP_R052	6
28225785	Hernández et al. 2017	V3 (357F) - V5 (926 R)	CCTACGGGAGGCAGCAG	KP_F046	17	CCGTCAATTCMTTTRAGT	OP_R052	6	CCTACGGGAGGCAGCAG--CCGTCAATTCMTTTRAGT	KP_F046-OP_R052	6
24965363	Eren et al. 2014	V3 (357F) - V5 (926R)	CCTACGGGAGGCAGCAG	KP_F046	17	CCGTCAATTCMTTTRAGT	OP_R052	6	CCTACGGGAGGCAGCAG--CCGTCAATTCMTTTRAGT	KP_F046-OP_R052	6
18033835	Hooper et al. 2007	D88 - E94	GAGAGTTTGATYMTGGCTCAG	OP_F078	11	GAAGGAGGTGWTCCARCCGCA	OP_R090	8	GAGAGTTTGATYMTGGCTCAG--GAAGGAGGTGWTCCARCCGCA	OP_F078-OP_R090	6
11371542	Paster et al. 2001	D88 - E94	GAGAGTTTGATYMTGGCTCAG	OP_F078	11	GAAGGAGGTGWTCCARCCGCA	OP_R090	8	GAGAGTTTGATYMTGGCTCAG--GAAGGAGGTGWTCCARCCGCA	OP_F078-OP_R090	6
18216213	Aas et al. 2008	-	GAGAGTTTGATYMTGGCTCAG	OP_F078	11	GAAGGAGGTGWTCCARCCGCA	OP_R090	8	GAGAGTTTGATYMTGGCTCAG--GAAGGAGGTGWTCCARCCGCA	OP_F078-OP_R090	6
27224567	Nóbrega et al. 2016	D88 - E94	GAGAGTTTGATYMTGGCTCAG	OP_F078	11	GAAGGAGGTGWTCCARCCGCA	OP_R090	8	GAGAGTTTGATYMTGGCTCAG--GAAGGAGGTGWTCCARCCGCA	OP_F078-OP_R090	6
12037085	Paster et al. 2002	D88 - E94	GAGAGTTTGATYMTGGCTCAG	OP_F078	11	GAAGGAGGTGWTCCARCCGCA	OP_R090	8	GAGAGTTTGATYMTGGCTCAG--GAAGGAGGTGWTCCARCCGCA	OP_F078-OP_R090	6
24460707	Zhuang et al. 2014	D88 - E94	GAGAGTTTGATYMTGGCTCAG	OP_F078	11	GAAGGAGGTGWTCCARCCGCA	OP_R090	8	GAGAGTTTGATYMTGGCTCAG--GAAGGAGGTGWTCCARCCGCA	OP_F078-OP_R090	6
30280027	Zhou et al. 2018	V3 (338F) - (V4) 806R	ACTCCTACGGGAGGCAGCAG	KP_F044	6	GGACTACHVGGGTWTCTAAT	OP_R010	54	ACTCCTACGGGAGGCAGCAG--GGACTACHVGGGTWTCTAAT	KP_F044-OP_R010	5
28095925	Yu et al. 2017	V3 (319F) - V4 (806R)	ACTCCTACGGGAGGCAGCAG	KP_F044	6	GGACTACHVGGGTWTCTAAT	OP_R010	54	ACTCCTACGGGAGGCAGCAG--GGACTACHVGGGTWTCTAAT	KP_F044-OP_R010	5
27770008	Yu et al. 2017	V3 (319F) - V4 (806R)	ACTCCTACGGGAGGCAGCAG	KP_F044	6	GGACTACHVGGGTWTCTAAT	OP_R010	54	ACTCCTACGGGAGGCAGCAG--GGACTACHVGGGTWTCTAAT	KP_F044-OP_R010	5
28780383	Apatzidou et al. 2017	V3 (319F) - V4 (806R)	ACTCCTACGGGAGGCAGCAG	KP_F044	6	GGACTACHVGGGTWTCTAAT	OP_R010	54	ACTCCTACGGGAGGCAGCAG--GGACTACHVGGGTWTCTAAT	KP_F044-OP_R010	5
31793046	Liu et al. 2020	V3 (338F) - V4 (806R)	ACTCCTACGGGAGGCAGCAG	KP_F044	6	GGACTACHVGGGTWTCTAAT	OP_R010	54	ACTCCTACGGGAGGCAGCAG--GGACTACHVGGGTWTCTAAT	KP_F044-OP_R010	5
23071716	Conlan et al. 2012	V1 (8F) - V3 (534R)	AGAGTTTGATCCTGGCTCAG	KP_F031	44	ATTACCGCGGCTGCTGG	KP_R023	20	AGAGTTTGATCCTGGCTCAG--ATTACCGCGGCTGCTGG	KP_F031-KP_R023	5
31003081	Diez López et al. 2019	V1 (F27) - V3 (R534)	AGAGTTTGATCCTGGCTCAG	KP_F031	44	ATTACCGCGGCTGCTGG	KP_R023	20	AGAGTTTGATCCTGGCTCAG--ATTACCGCGGCTGCTGG	KP_F031-KP_R023	5
29430138	Nedumgottil et al. 2018	8 - 534	AGAGTTTGATCCTGGCTCAG	KP_F031	44	ATTACCGCGGCTGCTGG	KP_R023	20	AGAGTTTGATCCTGGCTCAG--ATTACCGCGGCTGCTGG	KP_F031-KP_R023	5
24965363	Eren et al. 2014	V1 (27F) - V3 (534R)	AGAGTTTGATCCTGGCTCAG	KP_F031	44	ATTACCGCGGCTGCTGG	KP_R023	20	AGAGTTTGATCCTGGCTCAG--ATTACCGCGGCTGCTGG	KP_F031-KP_R023	5
25398868	Kirst et al. 2015	V1 (27F) - V3 (534R)	AGAGTTTGATCCTGGCTCAG	KP_F031	44	ATTACCGCGGCTGCTGG	KP_R023	20	AGAGTTTGATCCTGGCTCAG--ATTACCGCGGCTGCTGG	KP_F031-KP_R023	5
27191390	Liu et al. 2016	V1 (338F) - V3 (806R)	GTACTCCTACGGGAGGCAGCA	OP_F031	5	GTGGACTACHVGGGTWTCTAAT	OP_R031	5	GTACTCCTACGGGAGGCAGCA--GTGGACTACHVGGGTWTCTAAT	OP_F031-OP_R031	5
26752284	Shi et al. 2016	V3 (338F) - V4 (806R)	GTACTCCTACGGGAGGCAGCA	OP_F031	5	GTGGACTACHVGGGTWTCTAAT	OP_R031	5	GTACTCCTACGGGAGGCAGCA--GTGGACTACHVGGGTWTCTAAT	OP_F031-OP_R031	5
30300382	Yue et al. 2018	V3 (338F) - V4 (806R)	GTACTCCTACGGGAGGCAGCA	OP_F031	5	GTGGACTACHVGGGTWTCTAAT	OP_R031	5	GTACTCCTACGGGAGGCAGCA--GTGGACTACHVGGGTWTCTAAT	OP_F031-OP_R031	5
29266363	Liu et al. 2018	V3 (338F) - V4 (806R)	GTACTCCTACGGGAGGCAGCA	OP_F031	5	GTGGACTACHVGGGTWTCTAAT	OP_R031	5	GTACTCCTACGGGAGGCAGCA--GTGGACTACHVGGGTWTCTAAT	OP_F031-OP_R031	5
28808698	Deng et al. 2017	V3 (336F) - V4 (806R)	GTACTCCTACGGGAGGCAGCA	OP_F031	5	GTGGACTACHVGGGTWTCTAAT	OP_R031	5	GTACTCCTACGGGAGGCAGCA--GTGGACTACHVGGGTWTCTAAT	OP_F031-OP_R031	5
32925997	Aleksandrowicz et al. 2020	-	ACKGCTCAGTAACACGT	KP_F013	4	GTGCTCCCCCGCCAATTCCT	KP_R007	7	ACKGCTCAGTAACACGT--GTGCTCCCCCGCCAATTCCT	KP_F013-KP_R007	4
26557034	Efenberger et al. 2015	-	ACKGCTCAGTAACACGT	KP_F013	4	GTGCTCCCCCGCCAATTCCT	KP_R007	7	ACKGCTCAGTAACACGT--GTGCTCCCCCGCCAATTCCT	KP_F013-KP_R007	4
29401401	Brzezińska-Błaszczyk et al. 2018	-	ACKGCTCAGTAACACGT	KP_F013	4	GTGCTCCCCCGCCAATTCCT	KP_R007	7	ACKGCTCAGTAACACGT--GTGCTCCCCCGCCAATTCCT	KP_F013-KP_R007	4
19702957	Vianna et al. 2009	A109F - A934R	ACKGCTCAGTAACACGT	KP_F013	4	GTGCTCCCCCGCCAATTCCT	KP_R007	7	ACKGCTCAGTAACACGT--GTGCTCCCCCGCCAATTCCT	KP_F013-KP_R007	4
22251411	Ozok et al. 2012	V5 (785F) - V6 (1061R)	GGATTAGATACCCBRGTAGTC	OP_F009	12	TCACGRCACGAGCTGACGAC	KP_R055	4	GGATTAGATACCCBRGTAGTC--TCACGRCACGAGCTGACGAC	OP_F009-KP_R055	4
22412957	Biesbroeck et al. 2012	V5 - V7	GGATTAGATACCCBRGTAGTC	OP_F009	12	TCACGRCACGAGCTGACGAC	KP_R055	4	GGATTAGATACCCBRGTAGTC--TCACGRCACGAGCTGACGAC	OP_F009-KP_R055	4
21371338	Crielaard et al. 2011	V5 (785F) - V6 (1061R)	GGATTAGATACCCBRGTAGTC	OP_F009	12	TCACGRCACGAGCTGACGAC	KP_R055	4	GGATTAGATACCCBRGTAGTC--TCACGRCACGAGCTGACGAC	OP_F009-KP_R055	4
22251411	Ozok et al. 2012	V5 (785F) - V6 (1061R)	GGATTAGATACCCBRGTAGTC	OP_F009	12	TCACGRCACGAGCTGACGAC	KP_R055	4	GGATTAGATACCCBRGTAGTC--TCACGRCACGAGCTGACGAC	OP_F009-KP_R055	4
28500338	Al-hebshi et al. 2017	V1 (27FYM) - V3 (519R)	AGAGTTTGATYMTGGCTCAG	KP_F032	11	GWATTACCGCGGCKGCTG	KP_R070	6	AGAGTTTGATYMTGGCTCAG--GWATTACCGCGGCKGCTG	KP_F032-KP_R070	4
23967169	Kistler et al. 2013	V1 (A-27FYM) - V3 (B-519R)	AGAGTTTGATYMTGGCTCAG	KP_F032	11	GWATTACCGCGGCKGCTG	KP_R070	6	AGAGTTTGATYMTGGCTCAG--GWATTACCGCGGCKGCTG	KP_F032-KP_R070	4
27193835	Al-hebshi et al. 2016	V1 (27FYM) - V3 (519R)	AGAGTTTGATYMTGGCTCAG	KP_F032	11	GWATTACCGCGGCKGCTG	KP_R070	6	AGAGTTTGATYMTGGCTCAG--GWATTACCGCGGCKGCTG	KP_F032-KP_R070	4
26426306	Al-hebshi et al. 2015	V1 (27FYM) - V3 (519R)	AGAGTTTGATYMTGGCTCAG	KP_F032	11	GWATTACCGCGGCKGCTG	KP_R070	6	AGAGTTTGATYMTGGCTCAG--GWATTACCGCGGCKGCTG	KP_F032-KP_R070	4
25097398	Arul et al. 2014	27F - 1492R	AGAGTTTGATCCTGGCTCAG	KP_F031	44	GGTTACCTTGTTACGACTT	KP_R080	5	AGAGTTTGATCCTGGCTCAG--GGTTACCTTGTTACGACTT	KP_F031-KP_R080	4
16959625	Chuang et al. 2006	8FPL - 1492	AGAGTTTGATCCTGGCTCAG	KP_F031	44	GGTTACCTTGTTACGACTT	KP_R080	5	AGAGTTTGATCCTGGCTCAG--GGTTACCTTGTTACGACTT	KP_F031-KP_R080	4
10529113	Sakamoto et al. 1999	27F - 1492R	AGAGTTTGATCCTGGCTCAG	KP_F031	44	GGTTACCTTGTTACGACTT	KP_R080	5	AGAGTTTGATCCTGGCTCAG--GGTTACCTTGTTACGACTT	KP_F031-KP_R080	4
22760045	Iwai et al. 2012	27F - 1492R	AGAGTTTGATCCTGGCTCAG	KP_F031	44	GGTTACCTTGTTACGACTT	KP_R080	5	AGAGTTTGATCCTGGCTCAG--GGTTACCTTGTTACGACTT	KP_F031-KP_R080	4
32296599	Sundstrom et al. 2020	V3 (341F) - V4 (806R)	CCTACGGGAGGCAGCAG	KP_F046	17	GGACTACHVGGGTWTCTAAT	OP_R010	54	CCTACGGGAGGCAGCAG--GGACTACHVGGGTWTCTAAT	KP_F046-OP_R010	3
26684897	Rudney et al. 2015	V3 (341F) - V4 (806R)	CCTACGGGAGGCAGCAG	KP_F046	17	GGACTACHVGGGTWTCTAAT	OP_R010	54	CCTACGGGAGGCAGCAG--GGACTACHVGGGTWTCTAAT	KP_F046-OP_R010	3
28766745	Sanz-Martin et al. 2017	V3 (341F) - V4 (806R)	CCTACGGGAGGCAGCAG	KP_F046	17	GGACTACHVGGGTWTCTAAT	OP_R010	54	CCTACGGGAGGCAGCAG--GGACTACHVGGGTWTCTAAT	KP_F046-OP_R010	3
26984526	Zhang et al. 2016	V4(515F)-V4 (806R)	GTGCCAGCMGCCGCGGTAA	KP_F078	39	GGACTACVSGGGTATCTAAT	KP_R005	7	GTGCCAGCMGCCGCGGTAA--GGACTACVSGGGTATCTAAT	KP_F078-KP_R005	3
24887397	Schmidt et al. 2014	V4 (515F - 806R)	GTGCCAGCMGCCGCGGTAA	KP_F078	39	GGACTACVSGGGTATCTAAT	KP_R005	7	GTGCCAGCMGCCGCGGTAA--GGACTACVSGGGTATCTAAT	KP_F078-KP_R005	3
31739075	Dame-Teixeira et al. 2020	F515 - R806	GTGCCAGCMGCCGCGGTAA	KP_F078	39	GGACTACVSGGGTATCTAAT	KP_R005	7	GTGCCAGCMGCCGCGGTAA--GGACTACVSGGGTATCTAAT	KP_F078-KP_R005	3
26437933	Zheng et al. 2015	V1 (27F)-V3 (534R)	AGAGTTTGATCMTGGCTCAG	KP_F034	35	ATTACCGCGGCTGCTGG	KP_R023	20	AGAGTTTGATCMTGGCTCAG--ATTACCGCGGCTGCTGG	KP_F034-KP_R023	3
32169076	Murugesan et al. 2020	V1 (27F)-V3 (534R)	AGAGTTTGATCMTGGCTCAG	KP_F034	35	ATTACCGCGGCTGCTGG	KP_R023	20	AGAGTTTGATCMTGGCTCAG--ATTACCGCGGCTGCTGG	KP_F034-KP_R023	3
25283067	Moon et al. 2015	9F - 541R	AGAGTTTGATCMTGGCTCAG	KP_F034	35	ATTACCGCGGCTGCTGG	KP_R023	20	AGAGTTTGATCMTGGCTCAG--ATTACCGCGGCTGCTGG	KP_F034-KP_R023	3
21829515	Ahn et al. 2011	347F-803R	GGAGGCAGCAGTRRGGAAT	KP_F049	3	CTACCRGGGTATCTAATCC	KP_R034	4	GGAGGCAGCAGTRRGGAAT--CTACCRGGGTATCTAATCC	KP_F049-KP_R034	3
29327043	Hayes et al. 2018	V3 (347F) - V4 (803R)	GGAGGCAGCAGTRRGGAAT	KP_F049	3	CTACCRGGGTATCTAATCC	KP_R034	4	GGAGGCAGCAGTRRGGAAT--CTACCRGGGTATCTAATCC	KP_F049-KP_R034	3
25946126	Vestman et al. 2015	V3 (347F) - V4 (803R)	GGAGGCAGCAGTRRGGAAT	KP_F049	3	CTACCRGGGTATCTAATCC	KP_R034	4	GGAGGCAGCAGTRRGGAAT--CTACCRGGGTATCTAATCC	KP_F049-KP_R034	3
25515234	Li et al. 2014	V1-V2	AGAGTTTGATCMTGGCTCAG	KP_F034	35	CYIACTGCTGCCTCCCGTAG		4	AGAGTTTGATCMTGGCTCAG--CYIACTGCTGCCTCCCGTAG	KP_F034-	3
24778776	Abusleme et al. 2014	V1-V2	AGAGTTTGATCMTGGCTCAG	KP_F034	35	CYIACTGCTGCCTCCCGTAG		4	AGAGTTTGATCMTGGCTCAG--CYIACTGCTGCCTCCCGTAG	KP_F034-	3
23303375	Abusleme et al. 2013	V1 (8F) - V2 (431R)	AGAGTTTGATCMTGGCTCAG	KP_F034	35	CYIACTGCTGCCTCCCGTAG		4	AGAGTTTGATCMTGGCTCAG--CYIACTGCTGCCTCCCGTAG	KP_F034-	3
22300522	Lazarevic et al. 2012	V1-V3	GAGTTTGATCMTGGCTCAG	KP_F036	5	CCGCGRCTGCTGGCAC	OP_R043	3	GAGTTTGATCMTGGCTCAG--CCGCGRCTGCTGGCAC	KP_F036-OP_R043	3
20920195	Lazarevic et al. 2010	V1 (8Fhomd) - V3 (534RhomdDEGa)	GAGTTTGATCMTGGCTCAG	KP_F036	5	CCGCGRCTGCTGGCAC	OP_R043	3	GAGTTTGATCMTGGCTCAG--CCGCGRCTGCTGGCAC	KP_F036-OP_R043	3
23565884	Lazarevic et al. 2013	V1 - V3 (28 - 514)	GAGTTTGATCMTGGCTCAG	KP_F036	5	CCGCGRCTGCTGGCAC	OP_R043	3	GAGTTTGATCMTGGCTCAG--CCGCGRCTGCTGGCAC	KP_F036-OP_R043	3
30594172	Tao et al. 2018	V4(515F)-V5 (907R)	GTGCCAGCMGCCGCGG	OP_F021	5	CCGTCAATTCMTTTRAGTTT	OP_R050	4	GTGCCAGCMGCCGCGG--CCGTCAATTCMTTTRAGTTT	OP_F021-OP_R050	3
29740156	Wu et al. 2018	V4 (515F) - V5 (907R)	GTGCCAGCMGCCGCGG	OP_F021	5	CCGTCAATTCMTTTRAGTTT	OP_R050	4	GTGCCAGCMGCCGCGG--CCGTCAATTCMTTTRAGTTT	OP_F021-OP_R050	3
27578261	Ye et al. 2016	515F - 907R	GTGCCAGCMGCCGCGG	OP_F021	5	CCGTCAATTCMTTTRAGTTT	OP_R050	4	GTGCCAGCMGCCGCGG--CCGTCAATTCMTTTRAGTTT	OP_F021-OP_R050	3
18206402	Sun et al. 2008	-	GATTAGATACCCTGGTAGTCCAC	OP_F051	3	CCCGGGAACGTATTCACCG	OP_R055	4	GATTAGATACCCTGGTAGTCCAC--CCCGGGAACGTATTCACCG	OP_F051-OP_R055	3
17600539	Siqueira et al. 2007	V5 (786–808)-V8 (1369–1387)	GATTAGATACCCTGGTAGTCCAC	OP_F051	3	CCCGGGAACGTATTCACCG	OP_R055	4	GATTAGATACCCTGGTAGTCCAC--CCCGGGAACGTATTCACCG	OP_F051-OP_R055	3
24484531	Tan et al. 2014	-	GATTAGATACCCTGGTAGTCCAC	OP_F051	3	CCCGGGAACGTATTCACCG	OP_R055	4	GATTAGATACCCTGGTAGTCCAC--CCCGGGAACGTATTCACCG	OP_F051-OP_R055	3
18033835	Hooper et al. 2007	D88 - C90	GAGAGTTTGATYMTGGCTCAG	OP_F078	11	GTTACGACTTCACCCTCCT	OP_R091	5	GAGAGTTTGATYMTGGCTCAG--GTTACGACTTCACCCTCCT	OP_F078-OP_R091	3
11371542	Paster et al. 2001	D88 - C90	GAGAGTTTGATYMTGGCTCAG	OP_F078	11	GTTACGACTTCACCCTCCT	OP_R091	5	GAGAGTTTGATYMTGGCTCAG--GTTACGACTTCACCCTCCT	OP_F078-OP_R091	3
12037085	Paster et al. 2002	D88 - C90	GAGAGTTTGATYMTGGCTCAG	OP_F078	11	GTTACGACTTCACCCTCCT	OP_R091	5	GAGAGTTTGATYMTGGCTCAG--GTTACGACTTCACCCTCCT	OP_F078-OP_R091	3
31211815	Rusthen et al. 2019	V3 (334F) - V5 (938R)	CCAGACTCCTACGGGAGGCAGC	OP_F087	3	CTTGTGCGGGCCCCCGTCAATTC	OP_R103	3	CCAGACTCCTACGGGAGGCAGC--CTTGTGCGGGCCCCCGTCAATTC	OP_F087-OP_R103	3
27476443	Langbach et al. 2016	V3 (334F) - V5 (939R)	CCAGACTCCTACGGGAGGCAGC	OP_F087	3	CTTGTGCGGGCCCCCGTCAATTC	OP_R103	3	CCAGACTCCTACGGGAGGCAGC--CTTGTGCGGGCCCCCGTCAATTC	OP_F087-OP_R103	3
29306533	Zandi et al. 2018	V3 (334F) - V5 (939R)	CCAGACTCCTACGGGAGGCAGC	OP_F087	3	CTTGTGCGGGCCCCCGTCAATTC	OP_R103	3	CCAGACTCCTACGGGAGGCAGC--CTTGTGCGGGCCCCCGTCAATTC	OP_F087-OP_R103	3
33024215	Kumpitsch et al. 2020	519F - 806R	CAGCMGCCGCGGTAA	KP_F020	4	GGACTACVSGGGTATCTAAT	KP_R005	7	CAGCMGCCGCGGTAA--GGACTACVSGGGTATCTAAT	KP_F020-KP_R005	2
31866971	Pausan et al. 2019	519F-806R	CAGCMGCCGCGGTAA	KP_F020	4	GGACTACVSGGGTATCTAAT	KP_R005	7	CAGCMGCCGCGGTAA--GGACTACVSGGGTATCTAAT	KP_F020-KP_R005	2
29138298	Koskinen et al. 2017	344F - 915R	ACGGGGYGCAGCAGGCGCGA	KP_F017	6	GTGCTCCCCCGCCAATTCCT	KP_R007	7	ACGGGGYGCAGCAGGCGCGA--GTGCTCCCCCGCCAATTCCT	KP_F017-KP_R007	2
31866971	Pausan et al. 2019	344F-915R	ACGGGGYGCAGCAGGCGCGA	KP_F017	6	GTGCTCCCCCGCCAATTCCT	KP_R007	7	ACGGGGYGCAGCAGGCGCGA--GTGCTCCCCCGCCAATTCCT	KP_F017-KP_R007	2
33024215	Kumpitsch et al. 2020	344F - 1041R	ACGGGGYGCAGCAGGCGCGA	KP_F017	6	GGCCATGCACCWCCTCTC	KP_R013	3	ACGGGGYGCAGCAGGCGCGA--GGCCATGCACCWCCTCTC	KP_F017-KP_R013	2
31866971	Pausan et al. 2019	344F-1041R	ACGGGGYGCAGCAGGCGCGA	KP_F017	6	GGCCATGCACCWCCTCTC	KP_R013	3	ACGGGGYGCAGCAGGCGCGA--GGCCATGCACCWCCTCTC	KP_F017-KP_R013	2
27262209	Tsai et al. 2018	V1-V2	AGAGTTTGATCCTGGCTCAG	KP_F031	44	TGCTGCCTCCCGTAGGAGT	KP_R018	5	AGAGTTTGATCCTGGCTCAG--TGCTGCCTCCCGTAGGAGT	KP_F031-KP_R018	2
27338728	Lauder et al. 2016	V1 (27F) - V2 (338R)	AGAGTTTGATCCTGGCTCAG	KP_F031	44	TGCTGCCTCCCGTAGGAGT	KP_R018	5	AGAGTTTGATCCTGGCTCAG--TGCTGCCTCCCGTAGGAGT	KP_F031-KP_R018	2
21235135	Damian et al. 2010	27F - 519 R	AGAGTTTGATCMTGGCTCAG	KP_F034	35	GWATTACCGCGGCKGCTG	KP_R070	6	AGAGTTTGATCMTGGCTCAG--GWATTACCGCGGCKGCTG	KP_F034-KP_R070	2
19447073	Valenza et al. 2009	27F - 519R	AGAGTTTGATCMTGGCTCAG	KP_F034	35	GWATTACCGCGGCKGCTG	KP_R070	6	AGAGTTTGATCMTGGCTCAG--GWATTACCGCGGCKGCTG	KP_F034-KP_R070	2
16238598	Rocas et al. 2005	27F - 1492R	AGAGTTTGATCCTGGCTCAG	KP_F031	44	ACGGCTACCTTGTTACGACTT	KP_R079	2	AGAGTTTGATCCTGGCTCAG--ACGGCTACCTTGTTACGACTT	KP_F031-KP_R079	2
16000454	Siqueira et al. 2005	27F - 1492R	AGAGTTTGATCCTGGCTCAG	KP_F031	44	ACGGCTACCTTGTTACGACTT	KP_R079	2	AGAGTTTGATCCTGGCTCAG--ACGGCTACCTTGTTACGACTT	KP_F031-KP_R079	2
22675498	Liu et al. 2012	-	AGAGTTTGATCCTGGCTCAG	KP_F031	44	CATGCTGCCTCCCGTAGGAGT	OP_R034	2	AGAGTTTGATCCTGGCTCAG--CATGCTGCCTCCCGTAGGAGT	KP_F031-OP_R034	2
20847007	Contreras et al. 2010	27F - 338R	AGAGTTTGATCCTGGCTCAG	KP_F031	44	CATGCTGCCTCCCGTAGGAGT	OP_R034	2	AGAGTTTGATCCTGGCTCAG--CATGCTGCCTCCCGTAGGAGT	KP_F031-OP_R034	2
11267768	Kulik et al. 2001	300fEyAr - 954rEyAr	AGCRRGAGCCCGGAGATGG	OP_F006	2	CGGCGTTGARTCCAATTAAAC	OP_R006	2	AGCRRGAGCCCGGAGATGG--CGGCGTTGARTCCAATTAAAC	OP_F006-OP_R006	2
21338359	Faveri et al. 2011	300fEyAr - 954rEyAr	AGCRRGAGCCCGGAGATGG	OP_F006	2	CGGCGTTGARTCCAATTAAAC	OP_R006	2	AGCRRGAGCCCGGAGATGG--CGGCGTTGARTCCAATTAAAC	OP_F006-OP_R006	2
25518856	Schaumman et al. 2014	V1 (27F) - V3 (521R)	AGAGTTTGATCMTGGCTCAG	KP_F034	35	ACCGCGGCTGCTGGCAC	OP_R040	2	AGAGTTTGATCMTGGCTCAG--ACCGCGGCTGCTGGCAC	KP_F034-OP_R040	2
21538072	Heuer et al. 2012	27F - 521R	AGAGTTTGATCMTGGCTCAG	KP_F034	35	ACCGCGGCTGCTGGCAC	OP_R040	2	AGAGTTTGATCMTGGCTCAG--ACCGCGGCTGCTGGCAC	KP_F034-OP_R040	2
31951641	Gruffaz et al. 2020	V1 (27F) - V2 (355R)	AGAGTTTGATCMTGGCTCAG	KP_F034	35	GCTGCCTCCCGTAGGAGT	OP_R054	4	AGAGTTTGATCMTGGCTCAG--GCTGCCTCCCGTAGGAGT	KP_F034-OP_R054	2
32246318	Chen et al. 2020	V1 (27F) - V2 (533R)	AGAGTTTGATCMTGGCTCAG	KP_F034	35	GCTGCCTCCCGTAGGAGT	OP_R054	4	AGAGTTTGATCMTGGCTCAG--GCTGCCTCCCGTAGGAGT	KP_F034-OP_R054	2
25278091	Maltez-Thomas et al. 2014	V1	AGAGTTTGATCMTGGCTCAG	KP_F034	35	TTACTCACCCGTICGCCRCT		2	AGAGTTTGATCMTGGCTCAG--TTACTCACCCGTICGCCRCT	KP_F034-	2
28886168	Sarkar et al. 2017	V1F - V1R	AGAGTTTGATCMTGGCTCAG	KP_F034	35	TTACTCACCCGTICGCCRCT		2	AGAGTTTGATCMTGGCTCAG--TTACTCACCCGTICGCCRCT	KP_F034-	2
10758875	Nakazawa et al. 2000	8-27 - 1492-1513	AGAGTTTGATCMTGGCTCAG	KP_F034	35	TTCAGCATTGTTCCATYGGCAT		2	AGAGTTTGATCMTGGCTCAG--TTCAGCATTGTTCCATYGGCAT	KP_F034-	2
16390338	Djais et al. 2006	8-27 - 1492-1513	AGAGTTTGATCMTGGCTCAG	KP_F034	35	TTCAGCATTGTTCCATYGGCAT		2	AGAGTTTGATCMTGGCTCAG--TTCAGCATTGTTCCATYGGCAT	KP_F034-	2
25227214	Vengerfeldt et al. 2014	V6	CAACGCGARGAACCTTACC	OP_F111	2	ACAACACGAGCTGACGAC	OP_R142	2	CAACGCGARGAACCTTACC--ACAACACGAGCTGACGAC	OP_F111-OP_R142	2
23785463	Burton et al. 2013	L-V6 - R-V6	CAACGCGARGAACCTTACC	OP_F111	2	ACAACACGAGCTGACGAC	OP_R142	2	CAACGCGARGAACCTTACC--ACAACACGAGCTGACGAC	OP_F111-OP_R142	2
30397210	Teng et al. 2018	V3-V4	CCTACGGRRBGCASCAGKVRVGAAT	OP_F046	2	GGACTACNVGGGTWTCTAATCC	OP_R048	2	CCTACGGRRBGCASCAGKVRVGAAT--GGACTACNVGGGTWTCTAATCC	OP_F046-OP_R048	2
31836795	Wang et al. 2019	V3 - V4	CCTACGGRRBGCASCAGKVRVGAAT	OP_F046	2	GGACTACNVGGGTWTCTAATCC	OP_R048	2	CCTACGGRRBGCASCAGKVRVGAAT--GGACTACNVGGGTWTCTAATCC	OP_F046-OP_R048	2
15815015	Ciantar et al. 2011	357F - 1492R	CTCCTACGGGAGGCAGCAG	OP_F096	3	TACGGYTACCTTGTTACGACTT	KP_R065	11	CTCCTACGGGAGGCAGCAG--TACGGYTACCTTGTTACGACTT	OP_F096-KP_R065	2
12588458	Pratten et al. 2003	357F - 1492R	CTCCTACGGGAGGCAGCAG	OP_F096	3	TACGGYTACCTTGTTACGACTT	KP_R065	11	CTCCTACGGGAGGCAGCAG--TACGGYTACCTTGTTACGACTT	OP_F096-KP_R065	2
18033835	Hooper et al. 2007	D88 - F01	GAGAGTTTGATYMTGGCTCAG	OP_F078	11	CCTTGTTACGACTTAGCCC	OP_R092	3	GAGAGTTTGATYMTGGCTCAG--CCTTGTTACGACTTAGCCC	OP_F078-OP_R092	2
11371542	Paster et al. 2001	D88 - F01	GAGAGTTTGATYMTGGCTCAG	OP_F078	11	CCTTGTTACGACTTAGCCC	OP_R092	3	GAGAGTTTGATYMTGGCTCAG--CCTTGTTACGACTTAGCCC	OP_F078-OP_R092	2
12631201	McBain et al. 2003	8FPL1 - 806R	GAGTTTGATCCTGGCTCAG	OP_F049	3	GGACTACCAGGGTATCTAAT	KP_R037	2	GAGTTTGATCCTGGCTCAG--GGACTACCAGGGTATCTAAT	OP_F049-KP_R037	2
14576113	McBain et al. 2003	8FPL1 - 806R	GAGTTTGATCCTGGCTCAG	OP_F049	3	GGACTACCAGGGTATCTAAT	KP_R037	2	GAGTTTGATCCTGGCTCAG--GGACTACCAGGGTATCTAAT	OP_F049-KP_R037	2
11923328	Kaplan et al. 2002	46-523	GCTTAACACATGCAAGTCGG	OP_F062	3	TGCTGGCACGGAGTTAGCCG	OP_R065	2	GCTTAACACATGCAAGTCGG--TGCTGGCACGGAGTTAGCCG	OP_F062-OP_R065	2
20654735	Reijden et al. 2010	-	GCTTAACACATGCAAGTCGG	OP_F062	3	TGCTGGCACGGAGTTAGCCG	OP_R065	2	GCTTAACACATGCAAGTCGG--TGCTGGCACGGAGTTAGCCG	OP_F062-OP_R065	2
27166431	Huynh et al. 2016	SDArch0333aS15 - SDArch1378aA20	TCCAGGCCCTACGGG	KP_F014	10	TGTGTGCAAGGAGCAGGGAC	OP_R004	3	TCCAGGCCCTACGGG--TGTGTGCAAGGAGCAGGGAC	KP_F014-OP_R004	2
15067114	Lepp et al. 2004	SDArch0333aS15 - SDArch1378aA20	TCCAGGCCCTACGGG	KP_F014	10	TGTGTGCAAGGAGCAGGGAC	OP_R004	3	TCCAGGCCCTACGGG--TGTGTGCAAGGAGCAGGGAC	KP_F014-OP_R004	2
19807788	Brands et al. 2010	331F-797R	TCCTACGGGAGGCAGCAGT	KP_F045	2	GGACTACCAGGGTATCTAATCCTGTT	KP_R029	2	TCCTACGGGAGGCAGCAGT--GGACTACCAGGGTATCTAATCCTGTT	KP_F045-KP_R029	2
24675997	Kianoush et al. 2014	V3 (331F) - V4 (797R)	TCCTACGGGAGGCAGCAGT	KP_F045	2	GGACTACCAGGGTATCTAATCCTGTT	KP_R029	2	TCCTACGGGAGGCAGCAGT--GGACTACCAGGGTATCTAATCCTGTT	KP_F045-KP_R029	2
30397210	Teng et al. 2018	V1-V3	TGGAGAGTTTGATCCTGGCTCAG	OP_F037	2	TACCGCGGCTGCTGGCAC	OP_R038	2	TGGAGAGTTTGATCCTGGCTCAG--TACCGCGGCTGCTGGCAC	OP_F037-OP_R038	2
27680288	Teng et al. 2016	V1 - V3	TGGAGAGTTTGATCCTGGCTCAG	OP_F037	2	TACCGCGGCTGCTGGCAC	OP_R038	2	TGGAGAGTTTGATCCTGGCTCAG--TACCGCGGCTGCTGGCAC	OP_F037-OP_R038	2
19543549	Gu et al. 2009	968F - 1401R	AACGCGAAGAACCTTAC	KP_F073	1	CGGTGTGTACAAGACCC	KP_R059	1	AACGCGAAGAACCTTAC--CGGTGTGTACAAGACCC	KP_F073-KP_R059	1
32541791	Holgerson et al. 2020	V3 (341F) - V4 (806R)	ACGGGAGGCAGCAG	OP_F050	1	GGACTACHVGGGTWTCTAAT	OP_R010	54	ACGGGAGGCAGCAG--GGACTACHVGGGTWTCTAAT	OP_F050-OP_R010	1
31866971	Pausan et al. 2019	344F-806R	ACGGGGYGCAGCAGGCGCGA	KP_F017	6	GGACTACVSGGGTATCTAAT	KP_R005	7	ACGGGGYGCAGCAGGCGCGA--GGACTACVSGGGTATCTAAT	KP_F017-KP_R005	1
31866971	Pausan et al. 2019	344F-519R	ACGGGGYGCAGCAGGCGCGA	KP_F017	6	TTACCGCGGCKGCTG	KP_R002	2	ACGGGGYGCAGCAGGCGCGA--TTACCGCGGCKGCTG	KP_F017-KP_R002	1
25830311	Huynh et al. 2015	Met83F - Met1340R	ACKGCTCAGTAACAC	OP_F016	1	CGGTGTGTGCAAGGAG	OP_R016	2	ACKGCTCAGTAACAC--CGGTGTGTGCAAGGAG	OP_F016-OP_R016	1
21205002	Pushalkar et al. 2011	V4 (bac1) - V5 (bac2)	ACTACGTGCCAGCAGCC	OP_F070	2	GGACTACCAGGGTATCTAATCC	OP_R088	1	ACTACGTGCCAGCAGCC--GGACTACCAGGGTATCTAATCC	OP_F070-OP_R088	1
22319750	Chen et al. 2011	V4-V5	ACTACGTGCCAGCAGCC	OP_F070	2	GGACTACCAGGGTATCTACTAATCC	OP_R080	1	ACTACGTGCCAGCAGCC--GGACTACCAGGGTATCTACTAATCC	OP_F070-OP_R080	1
31927405	Boehlke et al. 2019	V3	ACTCCTACGGGAGGCAGCAG	KP_F044	6	ATTACCGCGGCTGCTGG	KP_R023	20	ACTCCTACGGGAGGCAGCAG--ATTACCGCGGCTGCTGG	KP_F044-KP_R023	1
17085691	Ledder et al. 2007	V2 (HDA1) - V3 (HDA2)	ACTCCTACGGGAGGCAGCAGT	OP_F077	1	GTATTACCGCGGCTGCTGGCAC	OP_R051	2	ACTCCTACGGGAGGCAGCAGT--GTATTACCGCGGCTGCTGGCAC	OP_F077-OP_R051	1
30185233	Mukherjee et al. 2018	V1 (27F)-V3 (534R)	AGAATTTGATCTTGGTTCAG	OP_F054	1	ATTACCGCGGCTGCTGG	KP_R023	20	AGAATTTGATCTTGGTTCAG--ATTACCGCGGCTGCTGG	OP_F054-KP_R023	1
31745056	Salman et al. 2019	-	AGAGTTTGATCCTGGCTCAG	KP_F031	44	AAGGAGGTGATCCAGCCGCA	KP_R068	1	AGAGTTTGATCCTGGCTCAG--AAGGAGGTGATCCAGCCGCA	KP_F031-KP_R068	1
26984526	Zhang et al. 2016	8F-1541R	AGAGTTTGATCCTGGCTCAG	KP_F031	44	AAGGAGGTGATCCANCCRCA	OP_R008	2	AGAGTTTGATCCTGGCTCAG--AAGGAGGTGATCCANCCRCA	KP_F031-OP_R008	1
16000454	Siqueira et al. 2005	27F - 959-980	AGAGTTTGATCCTGGCTCAG	KP_F031	44	ACACTTGTACGTCTCCATACAC	OP_R130	1	AGAGTTTGATCCTGGCTCAG--ACACTTGTACGTCTCCATACAC	KP_F031-OP_R130	1
32515429	Hirasawa et al. 2020	27F - 520	AGAGTTTGATCCTGGCTCAG	KP_F031	44	ACCGCGGCTGCTGGC	OP_R146	1	AGAGTTTGATCCTGGCTCAG--ACCGCGGCTGCTGGC	KP_F031-OP_R146	1
28283005	Yildiz et al. 2017	BSF-8 - BSR-534	AGAGTTTGATCCTGGCTCAG	KP_F031	44	ATTACCGCGGCTGCTGGC	KP_R022	1	AGAGTTTGATCCTGGCTCAG--ATTACCGCGGCTGCTGGC	KP_F031-KP_R022	1
20107092	Kim et al. 2010	8UA-907B	AGAGTTTGATCCTGGCTCAG	KP_F031	44	CCGTCAATTCMTTTAGTTT	OP_R096	1	AGAGTTTGATCCTGGCTCAG--CCGTCAATTCMTTTAGTTT	KP_F031-OP_R096	1
16000454	Siqueira et al. 2005	27F - 825-843	AGAGTTTGATCCTGGCTCAG	KP_F031	44	CGCAGAATCCGTGGAAAGA	OP_R124	1	AGAGTTTGATCCTGGCTCAG--CGCAGAATCCGTGGAAAGA	KP_F031-OP_R124	1
27177110	Hesham et al. 2016	27F - 1492R	AGAGTTTGATCCTGGCTCAG	KP_F031	44	CGGCTACCTTGTTACGACTT	OP_R094	1	AGAGTTTGATCCTGGCTCAG--CGGCTACCTTGTTACGACTT	KP_F031-OP_R094	1
16000454	Siqueira et al. 2005	27F - 968-989	AGAGTTTGATCCTGGCTCAG	KP_F031	44	CGTCAATGTTTCCATCTCCTAC	OP_R126	1	AGAGTTTGATCCTGGCTCAG--CGTCAATGTTTCCATCTCCTAC	KP_F031-OP_R126	1
21188149	Charlson et al. 2010	BSF-8 - BSR-357	AGAGTTTGATCCTGGCTCAG	KP_F031	44	CTGCTGCCTYCCGTA	KP_R020	3	AGAGTTTGATCCTGGCTCAG--CTGCTGCCTYCCGTA	KP_F031-KP_R020	1
16000454	Siqueira et al. 2005	27F - 954-977	AGAGTTTGATCCTGGCTCAG	KP_F031	44	GAAAGTACGTCGTCGCCCTTTCAG	OP_R127	1	AGAGTTTGATCCTGGCTCAG--GAAAGTACGTCGTCGCCCTTTCAG	KP_F031-OP_R127	1
16000454	Siqueira et al. 2005	27F - 993-1016	AGAGTTTGATCCTGGCTCAG	KP_F031	44	GAAGGCACCACCCACTTTCATGGG	OP_R128	1	AGAGTTTGATCCTGGCTCAG--GAAGGCACCACCCACTTTCATGGG	KP_F031-OP_R128	1
17172525	Vickerman et al. 2007	8F - 1391R	AGAGTTTGATCCTGGCTCAG	KP_F031	44	GACGGGCGGTGTGTRCA	KP_R061	1	AGAGTTTGATCCTGGCTCAG--GACGGGCGGTGTGTRCA	KP_F031-KP_R061	1
20510651	Perkins et al. 2010	8F - 1391R	AGAGTTTGATCCTGGCTCAG	KP_F031	44	GACGGGCGGTGWGTRCA	KP_R060	1	AGAGTTTGATCCTGGCTCAG--GACGGGCGGTGWGTRCA	KP_F031-KP_R060	1
21110215	Kurabayashi et al. 2011	-	AGAGTTTGATCCTGGCTCAG	KP_F031	44	GCATTTCACCGCTACACCAG	OP_R058	1	AGAGTTTGATCCTGGCTCAG--GCATTTCACCGCTACACCAG	KP_F031-OP_R058	1
22839737	Hsiao et al. 2012	V1 (27F) - V2 (338R)	AGAGTTTGATCCTGGCTCAG	KP_F031	44	GCTGCCTCCCGTAGGAGT	OP_R054	4	AGAGTTTGATCCTGGCTCAG--GCTGCCTCCCGTAGGAGT	KP_F031-OP_R054	1
16597851	Vianna et al. 2006	PF1 - PR1	AGAGTTTGATCCTGGCTCAG	KP_F031	44	GGCTACCTTGTTACGACTT	KP_R016	1	AGAGTTTGATCCTGGCTCAG--GGCTACCTTGTTACGACTT	KP_F031-KP_R016	1
17172525	Vickerman et al. 2007	8F - 1492R	AGAGTTTGATCCTGGCTCAG	KP_F031	44	GGGTTACCTTGTTACGACTT	OP_R145	1	AGAGTTTGATCCTGGCTCAG--GGGTTACCTTGTTACGACTT	KP_F031-OP_R145	1
25166027	Zhang et al. 2014	27F - 1492R	AGAGTTTGATCCTGGCTCA	OP_F112	1	GGTTACCTTGTTACGACTT	KP_R080	5	AGAGTTTGATCCTGGCTCA--GGTTACCTTGTTACGACTT	OP_F112-KP_R080	1
16000454	Siqueira et al. 2005	27F - 982-1000	AGAGTTTGATCCTGGCTCAG	KP_F031	44	TGCGAAAGGGTCGATCCGC	OP_R129	1	AGAGTTTGATCCTGGCTCAG--TGCGAAAGGGTCGATCCGC	KP_F031-OP_R129	1
16000454	Siqueira et al. 2005	27F - 784-807	AGAGTTTGATCCTGGCTCAG	KP_F031	44	TGCGGCACGGAAGAAATACTCCCC	OP_R125	1	AGAGTTTGATCCTGGCTCAG--TGCGGCACGGAAGAAATACTCCCC	KP_F031-OP_R125	1
16000454	Siqueira et al. 2005	27F - 788-809	AGAGTTTGATCCTGGCTCAG	KP_F031	44	TGCGGCACGGACGGACAATCCG	OP_R131	1	AGAGTTTGATCCTGGCTCAG--TGCGGCACGGACGGACAATCCG	KP_F031-OP_R131	1
16000454	Siqueira et al. 2005	27F - 788-809	AGAGTTTGATCCTGGCTCAG	KP_F031	44	TGCGGCACGGAGGGATCGTCCC	OP_R132	1	AGAGTTTGATCCTGGCTCAG--TGCGGCACGGAGGGATCGTCCC	KP_F031-OP_R132	1
22693635	Vandecandelaere et al. 2012	V1 (27F) - V3 (519R)	AGAGTTTGATCCTGGCTGAG	OP_F109	1	GTATTACCGCGGCTGCTG	OP_R115	2	AGAGTTTGATCCTGGCTGAG--GTATTACCGCGGCTGCTG	OP_F109-OP_R115	1
30185233	Mukherjee et al. 2018	V1 (27F)-V3 (534R)	AGAGTTTGATCCTGGCTTAG	OP_F055	1	ATTACCGCGGCTGCTGG	KP_R023	20	AGAGTTTGATCCTGGCTTAG--ATTACCGCGGCTGCTGG	OP_F055-KP_R023	1
22413030	Bolivar et al. 2012	fD1-rP1	AGAGTTTGATCCTGGGTCAG	OP_F110	1	ACGGTTACCTTGTTACGACTT	OP_R140	1	AGAGTTTGATCCTGGGTCAG--ACGGTTACCTTGTTACGACTT	OP_F110-OP_R140	1
8782684	Wyss et al. 1996	TPU1 - RTU8	AGAGTTTGATCMTGGCTCAG	KP_F034	35	AAGGAGGTGATCCAKCCRCA	OP_R122	1	AGAGTTTGATCMTGGCTCAG--AAGGAGGTGATCCAKCCRCA	KP_F034-OP_R122	1
16390343	Lillo et al. 2006	27F-1525R	AGAGTTTGATCMTGGCTCAG	KP_F034	35	AAGGAGGTGWTCCARCC	OP_R077	3	AGAGTTTGATCMTGGCTCAG--AAGGAGGTGWTCCARCC	KP_F034-OP_R077	1
29630846	Perera et al. 2018	V1 (27FYM) - V3 (519R)	AGAGTTTGATCMTGGCTCAG	KP_F034	35	ATTACCGCGGCKGCTG		1	AGAGTTTGATCMTGGCTCAG--ATTACCGCGGCKGCTG	KP_F034-	1
27629863	Saleem et al. 2016	27F - 1492R	AGAGTTTGATCMTGGCTCAG	KP_F034	35	CGGTTACCTTGTTACGACTT	OP_R099	1	AGAGTTTGATCMTGGCTCAG--CGGTTACCTTGTTACGACTT	KP_F034-OP_R099	1
31380576	Gonçalves et al. 2019	V1 (27F) - V2 (357R)	AGAGTTTGATCMTGGCTCAG	KP_F034	35	CTGCTGCCTYCCGTA	KP_R020	3	AGAGTTTGATCMTGGCTCAG--CTGCTGCCTYCCGTA	KP_F034-KP_R020	1
27087538	Lee et al. 2016	V1 (27F) - V4 (800R)	AGAGTTTGATCMTGGCTCAG	KP_F034	35	GAGTTTGATCMTGGCTCAG		1	AGAGTTTGATCMTGGCTCAG--GAGTTTGATCMTGGCTCAG	KP_F034-	1
26461079	Camelo-Castillo et al. 2015	8F - 533R	AGAGTTTGATCMTGGCTCAG	KP_F034	35	GCTTACCGCGGCKGCTGGCACG		1	AGAGTTTGATCMTGGCTCAG--GCTTACCGCGGCKGCTGGCACG	KP_F034-	1
28259623	Pereira et al. 2017	pA-F1-3 - pD'-R1-3	AGAGTTTGATCMTGGCTCAG	KP_F034	35	GTATTACCGCGGCTGCTG	OP_R115	2	AGAGTTTGATCMTGGCTCAG--GTATTACCGCGGCTGCTG	KP_F034-OP_R115	1
27495902	Li et al. 2016	8F-533R	AGAGTTTGATCMTGGCTCAG	KP_F034	35	GTATTACCGCGGCTGCTGGCAC	OP_R051	2	AGAGTTTGATCMTGGCTCAG--GTATTACCGCGGCTGCTGGCAC	KP_F034-OP_R051	1
22881378	You et al. 2013	TPU1 - C90	AGAGTTTGATCMTGGCTCAG	KP_F034	35	GTTACGACTTCACCCTCCT	OP_R091	5	AGAGTTTGATCMTGGCTCAG--GTTACGACTTCACCCTCCT	KP_F034-OP_R091	1
30228377	Rupf et al. 2018	V1 (forw16S_27F) - V2 (rev16S_338R)	AGAGTTTGATCMTGGCTCAG	KP_F034	35	TGCTGCCTCCCGTAGGAGT	KP_R018	5	AGAGTTTGATCMTGGCTCAG--TGCTGCCTCCCGTAGGAGT	KP_F034-KP_R018	1
25671105	Hanshew et al. 2014	27F - 1492R	AGAGTTTGATCNTGGCTCAG		1	TACGGYTACCTTGTTACG		1	AGAGTTTGATCNTGGCTCAG--TACGGYTACCTTGTTACG	-	1
21738596	Kumar et al. 2011	V1 (27F) - V3 (519R)	AGAGTTTGATGMTGGCTCAG	OP_F026	1	TTACCGCGGCMGCSGGCAC	OP_R025	1	AGAGTTTGATGMTGGCTCAG--TTACCGCGGCMGCSGGCAC	OP_F026-OP_R025	1
11411720	Wyss et al. 2001	C70 - B37	AGAGTTTGATYMTGGC	OP_UI001	1	TACGGYTACCTTGTTACGA	OP_R123	1	AGAGTTTGATYMTGGC--TACGGYTACCTTGTTACGA	OP_UI001-OP_R123	1
30185233	Mukherjee et al. 2018	V1 (27F)-V3 (534R)	AGAGTTTGATYMTGGCTCAG	KP_F032	11	ATTACCGCGGCTGCTGG	KP_R023	20	AGAGTTTGATYMTGGCTCAG--ATTACCGCGGCTGCTGG	KP_F032-KP_R023	1
18218926	Frandsen et al. 2009	8-27 - 1361–1344	AGAGTTTGATYMTGGCTCAG	KP_F032	11	CCGGGAACGTATTCACCG	OP_R101	1	AGAGTTTGATYMTGGCTCAG--CCGGGAACGTATTCACCG	KP_F032-OP_R101	1
21689545	Ribeiro et al. 2011	D88 - E94	AGAGTTTGATYMTGGCTCAG	KP_F032	11	GAAGGAGGTGWTCCARCCGCA	OP_R090	8	AGAGTTTGATYMTGGCTCAG--GAAGGAGGTGWTCCARCCGCA	KP_F032-OP_R090	1
24439218	Nukano et al. 2014	8Fbac - 806Rbac	AGAGTTTGATYMTGGCTCAG	KP_F032	11	GGACTACCRGGGTATCTAA	OP_R119	1	AGAGTTTGATYMTGGCTCAG--GGACTACCRGGGTATCTAA	KP_F032-OP_R119	1
29458668	Al-Ahmad et al. 2018	27FYM - 1492R	AGAGTTTGATYMTGGCTCAG	KP_F032	11	TACGGYTACCTTGTTACGACTT	KP_R065	11	AGAGTTTGATYMTGGCTCAG--TACGGYTACCTTGTTACGACTT	KP_F032-KP_R065	1
18218926	Frandsen et al. 2008	8-27 - 534-515	AGAGTTTGATYMTGGCTCAG	KP_F032	11	TATTACCGCGGCTGCTGGCA	OP_R100	1	AGAGTTTGATYMTGGCTCAG--TATTACCGCGGCTGCTGGCA	KP_F032-OP_R100	1
25083880	Obata et al. 2014	8F - 338R	AGAGTTTGATYMTGGCTCAG	KP_F032	11	TGCTGCCTCCCGTAGGAGT	KP_R018	5	AGAGTTTGATYMTGGCTCAG--TGCTGCCTCCCGTAGGAGT	KP_F032-KP_R018	1
12324358	Loy et al. 2002	616V (S-D-Bact-0008-a-S-18) - 630R (S-D-Bact-1529-a-A-17)	AGAGTTTGATYMTGGCTC		2	CAKAAAGGAGGTGATCC	KP_R069	1	AGAGTTTGATYMTGGCTC--CAKAAAGGAGGTGATCC	-KP_R069	1
12324358	Loy et al. 2002	616V (S-D-Bact-0008-a-S-18) - 1492R (S-*-Proka-1492-a-A-19)	AGAGTTTGATYMTGGCTC		2	GGYTACCTTGTTACGACTT	OP_R084	1	AGAGTTTGATYMTGGCTC--GGYTACCTTGTTACGACTT	-OP_R084	1
27010812	Khelaifia et al. 2016	Stadt_16SF - Stadt_16SR	AGGAGCGACAGCAGAATGAT	OP_F019	1	CAGGACGCTTCACAGTACGA	OP_R018	1	AGGAGCGACAGCAGAATGAT--CAGGACGCTTCACAGTACGA	OP_F019-OP_R018	1
26984526	Zhang et al. 2016	V6 (784F)-V6(1061R)	AGGATTAGATACCCTGGTA	KP_F058	1	CRRCACGAGCTGACGAC	KP_R053	1	AGGATTAGATACCCTGGTA--CRRCACGAGCTGACGAC	KP_F058-KP_R053	1
27063111	Leake et al. 2016	792F - 891R	AGGATTAGATACCCTGGTAG	OP_F118	1	CGTACTCCCCAGGCGG	OP_R148	1	AGGATTAGATACCCTGGTAG--CGTACTCCCCAGGCGG	OP_F118-OP_R148	1
26984526	Zhang et al. 2016	16S-AatII-784F - 16S-AatII-338R	AGGATTAGATACCCTGGTAGTCCA	OP_F060	1	CACTGCTGCCTCCCGTAGGAGTNTGG	OP_R063	2	AGGATTAGATACCCTGGTAGTCCA--CACTGCTGCCTCCCGTAGGAGTNTGG	OP_F060-OP_R063	1
31424011	Radhakrishnan et al. 2019	-	AGGCAGCTTGCCATACTGCG	OP_F105	1	ACTGTTAGCAACTACCGATGT	OP_R135	1	AGGCAGCTTGCCATACTGCG--ACTGTTAGCAACTACCGATGT	OP_F105-OP_R135	1
30185233	Mukherjee et al. 2018	V1 (27F)-V3 (534R)	AGGGTTCGATTCTGGCTCAG	OP_F056	1	ATTACCGCGGCTGCTGG	KP_R023	20	AGGGTTCGATTCTGGCTCAG--ATTACCGCGGCTGCTGG	OP_F056-KP_R023	1
28404012	Elliott et al. 2017	27F - 338R	AGMGTTYGATYMTGGCTCAG	OP_F080	1	GCTGCCTCCCGTAGGAGT	OP_R054	4	AGMGTTYGATYMTGGCTCAG--GCTGCCTCCCGTAGGAGT	OP_F080-OP_R054	1
31502122	Ikeda et al. 2020	V1 (27Fmod) - V2 (338R)	AGRGTTTGATYMTGGCTCAG	OP_F091	1	TGCTGCCTCCCGTAGGAGT	KP_R018	5	AGRGTTTGATYMTGGCTCAG--TGCTGCCTCCCGTAGGAGT	OP_F091-KP_R018	1
26103050	Chen et al. 2015	8FLP-1527R	AGTTTGATCCTGGCTCAG	OP_F058	2	AGAAAGGAGGTGATCCAGCC	OP_R060	1	AGTTTGATCCTGGCTCAG--AGAAAGGAGGTGATCCAGCC	OP_F058-OP_R060	1
26103050	Chen et al. 2015	8FLP-1492RPL	AGTTTGATCCTGGCTCAG	OP_F058	2	GGTTACTTGTTACGACTT	OP_R059	1	AGTTTGATCCTGGCTCAG--GGTTACTTGTTACGACTT	OP_F058-OP_R059	1
22760039	Zbinden et al. 2012	BAK11 (10-27) - BAK2 (806-787)	AGTTTGATCMTGGCTCAG	OP_F063	1	GGACTACHAGGGTATCTAAT	OP_R066	1	AGTTTGATCMTGGCTCAG--GGACTACHAGGGTATCTAAT	OP_F063-OP_R066	1
28886168	Sarkar et al. 2017	V2F - V2R	AGYGGCGIACGGGTGAGTAA		1	CYIACTGCTGCCTCCCGTAG		4	AGYGGCGIACGGGTGAGTAA--CYIACTGCTGCCTCCCGTAG	-	1
26686411	Yu et al. 2016	F200S-R900S	ATACCCCATAGKCCGAGAGGTT	OP_F064	1	GCACRCCAACATCTCTGCTCG	OP_R071	1	ATACCCCATAGKCCGAGAGGTT--GCACRCCAACATCTCTGCTCG	OP_F064-OP_R071	1
17957246	Trang-Hung et al. 2007	L1 (781–797) - L2 (1066-1052)	ATTAGAKACCCTGGTAGTCC	OP_F079	1	CGACACGAGCTGACGACA	OP_R093	1	ATTAGAKACCCTGGTAGTCC--CGACACGAGCTGACGACA	OP_F079-OP_R093	1
30642327	Hurley et al. 2019	V4 (520F) - V5 (926R)	AYTGGGYDTAAAGNG	KP_F056	1	CCGTCAATTYYTTTRAGTTT	OP_R089	2	AYTGGGYDTAAAGNG--CCGTCAATTYYTTTRAGTTT	KP_F056-OP_R089	1
27357925	Ozga et al. 2016	V4 (515F-806R)	CACGGTCGKCGGCGCCATT	OP_F097	1	GGACTACHVGGGTWTCTAAT	OP_R010	54	CACGGTCGKCGGCGCCATT--GGACTACHVGGGTWTCTAAT	OP_F097-OP_R010	1
16000454	Siqueira et al. 2005	1007-1029 - 1369-1387	CAGAAATGCGGAGTTCTTCTTCG	OP_F102	1	CCCGGGAACGTATTCACCG	OP_R055	4	CAGAAATGCGGAGTTCTTCTTCG--CCCGGGAACGTATTCACCG	OP_F102-OP_R055	1
19508342	Grössner-Schreiber et al. 2009	Com1 (519-536) - Com2 (907-926)	CAGCAGCCGCGGTAATAC	OP_UI006	1	CCGTCAATTCCTTTGAGTTT	OP_R108	2	CAGCAGCCGCGGTAATAC--CCGTCAATTCCTTTGAGTTT	OP_UI006-OP_R108	1
22561061	Horz et al. 2012	AS1_Fw - As2_Rv	CAGCAGTCGCGAAAACTTC	OP_F011	1	AACAACTTCTCTCCGGCAC	OP_R011	1	CAGCAGTCGCGAAAACTTC--AACAACTTCTCTCCGGCAC	OP_F011-OP_R011	1
31866971	Pausan et al. 2019	519F-1041R	CAGCMGCCGCGGTAA	KP_F020	4	GGCCATGCACCWCCTCTC	KP_R013	3	CAGCMGCCGCGGTAA--GGCCATGCACCWCCTCTC	KP_F020-KP_R013	1
29138298	Koskinen et al. 2017	SD-Ar-519aS15 - SD-Ar-0785bA18	CAGCMGCCGCGGTAA	KP_F020	4	TACNVGGGTATCTAATCC	KP_R032	2	CAGCMGCCGCGGTAA--TACNVGGGTATCTAATCC	KP_F020-KP_R032	1
24974898	Dhotre et al. 2014	27F - 1525R	CCAGAGTTTGATCMTGGCTCAG	OP_F067	1	TTCTGCAGTCTAGAAGGAGGTGWTCCAGCC	OP_R074	1	CCAGAGTTTGATCMTGGCTCAG--TTCTGCAGTCTAGAAGGAGGTGWTCCAGCC	OP_F067-OP_R074	1
22753064	Filkins et al. 2012	V4 (518F) - V6 (1064R)	CCAGCAGCYGCGGTAAN	OP_F098	1	CGACRRCCATGCANCACCT	KP_R050	1	CCAGCAGCYGCGGTAAN--CGACRRCCATGCANCACCT	OP_F098-KP_R050	1
2469776	Chuba et al. 1998	U4 - U5	CCCGTCAATTCCTTTGAGTTT	OP_F074	1	TACCAGGGTATCTAATCCTGTT	OP_R086	1	CCCGTCAATTCCTTTGAGTTT--TACCAGGGTATCTAATCCTGTT	OP_F074-OP_R086	1
16000454	Siqueira et al. 2005	135-154 - 590-611	CCCTGCAGTGAGGGATAAGA	OP_F104	1	GTTTTCATCGCTCGCTAACTTG	OP_R134	1	CCCTGCAGTGAGGGATAAGA--GTTTTCATCGCTCGCTAACTTG	OP_F104-OP_R134	1
27010812	Khelaifia et al. 2016	Smit.16S-740F - Smit.16S-862R	CCGGGTATCTAATCCGGTTC	OP_F018	1	CTCCCAGGGTAGAGGTGAAA	OP_R017	1	CCGGGTATCTAATCCGGTTC--CTCCCAGGGTAGAGGTGAAA	OP_F018-OP_R017	1
25761675	Chen et al. 2015	V3	CCTACGGGAGGCAGCAG	KP_F046	17	ATTACCGCGGCTGCT	OP_R045	2	CCTACGGGAGGCAGCAG--ATTACCGCGGCTGCT	KP_F046-OP_R045	1
22685668	Sano et al. 2012	E341F - E907R	CCTACGGGAGGCAGCAG	KP_F046	17	CCGTCAATTCMTTTRAG	OP_R067	1	CCTACGGGAGGCAGCAG--CCGTCAATTCMTTTRAG	KP_F046-OP_R067	1
26641451	Chen et al. 2015	V3 (341F) - V4 (805R)	CCTACGGGNGGCWGCAG	KP_F047	27	CTACCRGGGTATCTAATCC	KP_R034	4	CCTACGGGNGGCWGCAG--CTACCRGGGTATCTAATCC	KP_F047-KP_R034	1
30580031	Dyrhovden et al. 2019	340-356 - 784-803	CCTACGGGNGGCWGCAG	KP_F047	27	GACTACCAGGGTATCTAAKCC	OP_R079	1	CCTACGGGNGGCWGCAG--GACTACCAGGGTATCTAAKCC	KP_F047-OP_R079	1
27107811	Lazarevic et al. 2016	V3 (341F) - ??	CCTACGGGNGGCWGCAG	KP_F047	27	GACTACHVGGGTATCTAAKCC	OP_R070	1	CCTACGGGNGGCWGCAG--GACTACHVGGGTATCTAAKCC	KP_F047-OP_R070	1
27771826	Persoon et al. 2017	V3 (341F) - V4 (806R)	CCTACGGGNGGCWGCAG	KP_F047	27	GGACTACHVGGGTWTCTAAT	OP_R010	54	CCTACGGGNGGCWGCAG--GGACTACHVGGGTWTCTAAT	KP_F047-OP_R010	1
31806002	Yeoh et al. 2019	V3 (341F) - V4 (806R)	CCTACGGGNGGCWGCAG	KP_F047	27	GGACTACNVGGGTWTCTAAT	OP_R014	2	CCTACGGGNGGCWGCAG--GGACTACNVGGGTWTCTAAT	KP_F047-OP_R014	1
31681625	Acharya et al. 2019	V3 - V4	CCTACGGGNGGCWGCAG	KP_F047	27	TACNVGGGTATCTAATCC	KP_R032	2	CCTACGGGNGGCWGCAG--TACNVGGGTATCTAATCC	KP_F047-KP_R032	1
26563586	Ziesemer et al. 2015	V3 (U341F - 534R)	CCTACGGGRSGCAGCAG	KP_F077	2	ACCGCGGCKGCTGGC	KP_R071	1	CCTACGGGRSGCAGCAG--ACCGCGGCKGCTGGC	KP_F077-KP_R071	1
24670254	Dassi et al. 2014	V3	CCTACGGGRSGCAGCAG	KP_F077	2	ATTACCGCGGCTGCT	OP_R045	2	CCTACGGGRSGCAGCAG--ATTACCGCGGCTGCT	KP_F077-OP_R045	1
31281801	Lundmark et al. 2019	341F - 805R	CCTAHGGGRBGCAGCAG	OP_F043	1	GACTACHVGGGTATCTAATCC	KP_R035	22	CCTAHGGGRBGCAGCAG--GACTACHVGGGTATCTAATCC	OP_F043-KP_R035	1
30508628	Xu et al. 2019	V3 (341F) - V5 (806R)	CCTAYGGGRBGCASCAG	OP_F114	1	GGACTACNNGGGTATCTAAT	OP_R036	2	CCTAYGGGRBGCASCAG--GGACTACNNGGGTATCTAAT	OP_F114-OP_R036	1
26984526	Zhang et al. 2016	16S-EcoRI-515F - 16S-EcoRI-338R	CGTGCCAGCMGCCGCGGTAATACG	OP_F059	1	CACTGCTGCCTCCCGTAGGAGTNTGG	OP_R063	2	CGTGCCAGCMGCCGCGGTAATACG--CACTGCTGCCTCCCGTAGGAGTNTGG	OP_F059-OP_R063	1
22367938	Ito et al. 2012	357F - 907R	CTCCTACGGGAGGCAGCAG	OP_F096	3	CCGTCAATTCMTTTRAGTTT	OP_R050	4	CTCCTACGGGAGGCAGCAG--CCGTCAATTCMTTTRAGTTT	OP_F096-OP_R050	1
16011760	Anesti et al. 2005	4F - 4R	CTTGAGACCGGAAGAGGAC	OP_F090	1	CCGATCTCTCGAGGTAACA	OP_R106	1	CTTGAGACCGGAAGAGGAC--CCGATCTCTCGAGGTAACA	OP_F090-OP_R106	1
28819242	Lim et al. 2017	V6 (917) - V8 (1392)	GAATTGRCGGGGRCC	OP_F101	1	ACGGGCGGTGWGTRC	OP_R121	1	GAATTGRCGGGGRCC--ACGGGCGGTGWGTRC	OP_F101-OP_R121	1
11594611	Paster et al. 2001	C75 (7-27) - C90 (1501-1483)	GAGAGTTTGATYCTGGCTCAG	OP_F106	1	GTTACGACTTCACCCTCCT	OP_R091	5	GAGAGTTTGATYCTGGCTCAG--GTTACGACTTCACCCTCCT	OP_F106-OP_R091	1
28413200	Mok et al. 2017	D88 - E94	GAGAGTTTGATYMTGGCTCAG		1	GAAGGAGGTGWTCCARCCGCA	OP_R090	8	GAGAGTTTGATYMTGGCTCAG --GAAGGAGGTGWTCCARCCGCA	-OP_R090	1
29735410	Hou et al. 2010	V4F - V4R	GAGTGCCAGCMGCCGCGGTAA	OP_F084	1	GGACTACHVGGGTWTCTAAT	OP_R010	54	GAGTGCCAGCMGCCGCGGTAA--GGACTACHVGGGTWTCTAAT	OP_F084-OP_R010	1
26856712	Niazi et al. 2016	9F - 907R	GAGTTTGATCCTGGCTCA	OP_F113	1	CGTCAATTCCTTTGAGTT	OP_R143	1	GAGTTTGATCCTGGCTCA--CGTCAATTCCTTTGAGTT	OP_F113-OP_R143	1
32040467	Kazemtabrizi et al. 2020	Nest1 F - Nest1 R	GAGTTTGATCCTGGCTCAG	OP_F049	3	GTTACCTTGTTACGACTT	OP_R082	1	GAGTTTGATCCTGGCTCAG--GTTACCTTGTTACGACTT	OP_F049-OP_R082	1
27135839	Schuerger et al. 2016	B27F - B1512R	GAGTTTGATCMTGGCTCAG	KP_F036	5	AAGGAGGTGATCCANCCRCA	OP_R008	2	GAGTTTGATCMTGGCTCAG--AAGGAGGTGATCCANCCRCA	KP_F036-OP_R008	1
27036492	Kim et al. 2016	V1 (9F) - V3 (541R)	GAGTTTGATCMTGGCTCAG	KP_F036	5	WTTACCGCGGCTGCTGG	KP_R025	1	GAGTTTGATCMTGGCTCAG--WTTACCGCGGCTGCTGG	KP_F036-KP_R025	1
20861633	Kanasi et al. 2010	F24 - F25	GAGTTTGATYMTGGCTCAG	OP_F082	4	AAGGAGGTGWTCCARCC	OP_R077	3	GAGTTTGATYMTGGCTCAG--AAGGAGGTGWTCCARCC	OP_F082-OP_R077	1
20656903	Dewhirst et al. 2010	F24 (9-27) - F01 (1487-1505)	GAGTTTGATYMTGGCTCAG	OP_F082	4	CCTTGTTACGACTTAGCCC	OP_R092	3	GAGTTTGATYMTGGCTCAG--CCTTGTTACGACTTAGCCC	OP_F082-OP_R092	1
20656903	Dewhirst et al. 2010	F24 (9-27) - Y36 (1525-1541)	GAGTTTGATYMTGGCTCAG	OP_F082	4	GAAGGAGGTGWTCCADCC	OP_R075	1	GAGTTTGATYMTGGCTCAG--GAAGGAGGTGWTCCADCC	OP_F082-OP_R075	1
20656903	Dewhirst et al. 2010	F24 (9-27) - M98 (1483-1501)	GAGTTTGATYMTGGCTCAG	OP_F082	4	GTTACGACTTCACCCYCCT	OP_R137	1	GAGTTTGATYMTGGCTCAG--GTTACGACTTCACCCYCCT	OP_F082-OP_R137	1
21738596	Kumar et al. 2011	V7 (1114F) -V9 (317)	GCAACGAGCGCAACCC	OP_F028	1	AAGGAGGTGATCCAGGC	OP_R027	2	GCAACGAGCGCAACCC--AAGGAGGTGATCCAGGC	OP_F028-OP_R027	1
24169577	Costello et al. 2013	V3 (338F) - V5 (906R)	GCACTCCTACGGGAGGCAGCA		1	CCGTCAATTCCTTTGAGTTT	OP_R108	2	GCACTCCTACGGGAGGCAGCA--CCGTCAATTCCTTTGAGTTT	-OP_R108	1
16455901	Han et al. 2006	-	GCGTGCTTAACACATGCAAGTC	OP_F093	1	AGGAGGTGATCCAACCGCA	OP_R110	1	GCGTGCTTAACACATGCAAGTC--AGGAGGTGATCCAACCGCA	OP_F093-OP_R110	1
32040467	Kazemtabrizi et al. 2020	Nest2 F - Nest2 R	GCRKGCCTAAYACATGCAAG	OP_F072	1	CGTGGACTACCAGGGTATCT	OP_R083	1	GCRKGCCTAAYACATGCAAG--CGTGGACTACCAGGGTATCT	OP_F072-OP_R083	1
21539593	Matarazzo et al. 2011	300fEyAr - 954rEyAr	GCRRGAGCCCGGAGATGG	OP_F010	1	CGGCGTTGARTCCZZTTAAAC		1	GCRRGAGCCCGGAGATGG--CGGCGTTGARTCCZZTTAAAC	OP_F010-	1
25830311	Huynh et al. 2015	Met86F - Met1340R	GCTCAGTAACACGTGG	OP_F017	1	CGGTGTGTGCAAGGAG	OP_R016	2	GCTCAGTAACACGTGG--CGGTGTGTGCAAGGAG	OP_F017-OP_R016	1
20654735	Reijden et al. 2010	-	GCTTAACACATGCAAGTCGG	OP_F062	3	TCGCGATTACTAGCGATTCC	OP_R078	1	GCTTAACACATGCAAGTCGG--TCGCGATTACTAGCGATTCC	OP_F062-OP_R078	1
25452281	Szafranski et al. 2015	V5 (807F) - V6 (1050R)	GGATTAGATACCCBRGTAGTC	OP_F009	12	AGYTGDCGACRRCCRTGCA		1	GGATTAGATACCCBRGTAGTC--AGYTGDCGACRRCCRTGCA	OP_F009-	1
22516132	Fujita et al. 2012	-	GGCKTGCGGTGGGTACGGGC	OP_F115	1	GGCTTTAAGGGATTCGCTCCRCCTCAC		1	GGCKTGCGGTGGGTACGGGC--GGCTTTAAGGGATTCGCTCCRCCTCAC	OP_F115-	1
30185233	Mukherjee et al. 2018	V8-23S	GGGCTACACACGYGCWAC	OP_F057	1	R NO RELEVANTE (23S)		1	GGGCTACACACGYGCWAC--R NO RELEVANTE (23S)	OP_F057-	1
19796657	Lazarevic et al. 2009	784DEG-880DEG	GGMTTAGATACCC	OP_F066	1	CRTACTHCHCAGGYG	OP_R073	1	GGMTTAGATACCC--CRTACTHCHCAGGYG	OP_F066-OP_R073	1
25683180	Macovei et al. 2015	9F - 1541R	GRGTTYGATYMTGGCTCAG	OP_F053	1	RAAGGAGGTGWTCCADCC	OP_R057	1	GRGTTYGATYMTGGCTCAG--RAAGGAGGTGWTCCADCC	OP_F053-OP_R057	1
20107092	Kim et al. 2010	774A-1485B	GTAGTCCACGCTGTAAACGATG	OP_F081	1	TACGGTTACCTTGTTACGAC	KP_R067	1	GTAGTCCACGCTGTAAACGATG--TACGGTTACCTTGTTACGAC	OP_F081-KP_R067	1
23762384	Ge et al. 2013	V4 (OM515F) - V6 (OM1061R)	GTGCCAGCAGCCGCGGTAA	OP_F030	1	TCACRRCACGAGCTGWCGAC	OP_R030	1	GTGCCAGCAGCCGCGGTAA--TCACRRCACGAGCTGWCGAC	OP_F030-OP_R030	1
16390343	Lillo et al. 2006	530F-1525R	GTGCCAGCMGCCGCGG	OP_F021	5	AAGGAGGTGWTCCARCC	OP_R077	3	GTGCCAGCMGCCGCGG--AAGGAGGTGWTCCARCC	OP_F021-OP_R077	1
28924229	Zhao et al. 2017	V4 (515F) - V5 (926R)	GTGCCAGCMGCCGCGGTAA	KP_F078	39	CCGTCAATTYYTTTRAGTTT	OP_R089	2	GTGCCAGCMGCCGCGGTAA--CCGTCAATTYYTTTRAGTTT	KP_F078-OP_R089	1
29765908	Shi et al. 2018	V4 (515F - 806R)	GTGCCAGCMGCCGCGGTAA	KP_F078	39	GGACTACNNGGGTATCTAAT	OP_R036	2	GTGCCAGCMGCCGCGGTAA--GGACTACNNGGGTATCTAAT	KP_F078-OP_R036	1
24671083	Li et al. 2014	F515 - R806	GTGCCAGCMGCCGCGG	OP_F021	5	TAATCTWTGGGVHCATCAG		1	GTGCCAGCMGCCGCGG--TAATCTWTGGGVHCATCAG	OP_F021-	1
25942317	Jiang et al. 2015	V5 (515F) - V6 (926R)	GTGCCAGCMGCCGCGGTAA	KP_F078	39	TTTGARTTTYYTTAACTGCC		1	GTGCCAGCMGCCGCGGTAA--TTTGARTTTYYTTAACTGCC	KP_F078-	1
21853142	Cephas et al. 2011	V4 (530F) - V6 (1100R)	GTGCCAGCMGCNGCGG	KP_F051	1	GGGTTNGNTCGTTG	OP_R056	1	GTGCCAGCMGCNGCGG--GGGTTNGNTCGTTG	KP_F051-OP_R056	1
21738596	Kumar et al. 2011	V4 (519F) - V6 (1114R)	GTGCCAGCTGCCGCGGTAATAC	OP_F027	1	GGGTTGCGCTCGTTGC	OP_R026	1	GTGCCAGCTGCCGCGGTAATAC--GGGTTGCGCTCGTTGC	OP_F027-OP_R026	1
19447073	Valenza et al. 2009	515F - 1525R	GTGCCSGCMGCCGCGGTAA	OP_F092	1	AAGGAGGTGATCCAGCC	OP_R107	1	GTGCCSGCMGCCGCGGTAA--AAGGAGGTGATCCAGCC	OP_F092-OP_R107	1
16238598	Rocas et al. 2005	88 - 387	GTGCTTATACGGATAAAGCCGT	OP_F095	1	GAAGCATTCCCTCTTCCCC	OP_R112	1	GTGCTTATACGGATAAAGCCGT--GAAGCATTCCCTCTTCCCC	OP_F095-OP_R112	1
30397210	Teng et al. 2018	V4-V5	GTGYCAGCMGCCGCGGTAA	OP_F014	3	CTTGTGCGGKCCCCCGYCAATTC	OP_R049	1	GTGYCAGCMGCCGCGGTAA--CTTGTGCGGKCCCCCGYCAATTC	OP_F014-OP_R049	1
32245419	Yu et al. 2020	V4 (515F - 806R)	GTGYCAGCMGCCGCGGTAA	OP_F014	3	GGACTACHVGGGTWTCTAAT	OP_R010	54	GTGYCAGCMGCCGCGGTAA--GGACTACHVGGGTWTCTAAT	OP_F014-OP_R010	1
33024215	Kumpitsch et al. 2020	515FB - 806RB	GTGYCAGCMGCCGCGGTAA	OP_F014	3	GGACTACNVGGGTWTCTAAT	OP_R014	2	GTGYCAGCMGCCGCGGTAA--GGACTACNVGGGTWTCTAAT	OP_F014-OP_R014	1
31151886	Renson et al. 2019	V4 (515F-806R)	GTGYCAGCMGCCGCGGTA	OP_F100	1	GGACTACHVGGGTWTCTAAT	OP_R010	54	GTGYCAGCMGCCGCGGTA--GGACTACHVGGGTWTCTAAT	OP_F100-OP_R010	1
20826648	Gross et al. 2010	V5 (A17) - V9 (317)	GTTTGATCCTGGCTCAG	OP_F025	3	AAGGAGGTGATCCAGGC	OP_R027	2	GTTTGATCCTGGCTCAG--AAGGAGGTGATCCAGGC	OP_F025-OP_R027	1
21738596	Kumar et al. 2011	V1 (A17) - V3 (519R)	GTTTGATCCTGGCTCAG	OP_F025	3	GTATTACCGCGGCAGCTGGCAC	OP_R024	1	GTTTGATCCTGGCTCAG--GTATTACCGCGGCAGCTGGCAC	OP_F025-OP_R024	1
16597879	Han et al. 2006	A17 - 1512R	GTTTGATCCTGGCTCAG	OP_F025	3	TACCTTGTTACGACTT	KP_R063	1	GTTTGATCCTGGCTCAG--TACCTTGTTACGACTT	OP_F025-KP_R063	1
22170420	Griffen et al. 2012	V1 (27F) - V2 (342R)	GTTTGATCMTGGCTCAG	OP_F032	1	CTGCTGCCTYCCGTA	KP_R020	3	GTTTGATCMTGGCTCAG--CTGCTGCCTYCCGTA	OP_F032-KP_R020	1
8168954	Choi et al. 1994	-	GWATTACCGCGGCKGCTG		1	AGAGTTTGATCMTGGCTCAG		1	GWATTACCGCGGCKGCTG--AGAGTTTGATCMTGGCTCAG	-	1
31866971	Pausan et al. 2019	349F-806R	GYGCASCAGKCGMGAAW	KP_F018	3	GGACTACVSGGGTATCTAAT	KP_R005	7	GYGCASCAGKCGMGAAW--GGACTACVSGGGTATCTAAT	KP_F018-KP_R005	1
31866971	Pausan et al. 2019	349F-915R	GYGCASCAGKCGMGAAW	KP_F018	3	GTGCTCCCCCGCCAATTCCT	KP_R007	7	GYGCASCAGKCGMGAAW--GTGCTCCCCCGCCAATTCCT	KP_F018-KP_R007	1
29138298	Koskinen et al. 2017	SD-Ar-349aS17 - SD-Ar-519aA16	GYGCASCAGKCGMGAAW	KP_F018	3	TTACCGCGGCKGCTG	KP_R002	2	GYGCASCAGKCGMGAAW--TTACCGCGGCKGCTG	KP_F018-KP_R002	1
25225610	Galiminas et al. 2014	V3 (modified 341F - 528R)	NNNNCCTACGGGAGGCAGCAG		1	ATTACCGCGGCTGCTGG	KP_R023	20	NNNNCCTACGGGAGGCAGCAG--ATTACCGCGGCTGCTGG	-KP_R023	1
26686411	Yu et al. 2016	F200PJ-R900PJ	TAAGCCGGAAGGTGAAARGSAG	OP_F065	1	TATCGCTACACCCASWCCCAGC	OP_R072	1	TAAGCCGGAAGGTGAAARGSAG--TATCGCTACACCCASWCCCAGC	OP_F065-OP_R072	1
31305026	Iwauchi et al. 2019	V3 (Tru357F) - V4 (Tru806R)	TACGGRAGGCAGCAG	KP_F048	1	GGACTACHVGGGTWTCTAAT	OP_R010	54	TACGGRAGGCAGCAG--GGACTACHVGGGTWTCTAAT	KP_F048-OP_R010	1
19807788	Brands et al. 2010	331F-I - 797R-I	TCCTACGGGAGGCAGCAGTI		1	GGACTACCAGGGTATCTAATCCTGTTI		1	TCCTACGGGAGGCAGCAGTI--GGACTACCAGGGTATCTAATCCTGTTI	-	1
27371581	Luo et al. 2016	V6	TCCWACGCGARGAACCTTAACC	OP_F088	1	CAACRACACGAGCTGACGAC	OP_R104	1	TCCWACGCGARGAACCTTAACC--CAACRACACGAGCTGACGAC	OP_F088-OP_R104	1
25797107	Horz et al. 2015	-	TGATCGGTACGGGTTGTG	OP_F015	1	CAACAGGCGGTCCTCCCA	OP_R015	1	TGATCGGTACGGGTTGTG--CAACAGGCGGTCCTCCCA	OP_F015-OP_R015	1
16238598	Rocas et al. 2005	191 - 651	TGCTTTGGCACCGCAGGG	OP_F094	1	GCCCTTCAGTGACTCCAGTCATC	OP_R111	1	TGCTTTGGCACCGCAGGG--GCCCTTCAGTGACTCCAGTCATC	OP_F094-OP_R111	1
16000454	Siqueira et al. 2005	442-465 - 982-1003	TGTGCGTTATTGCATGTATCGTAT	OP_F103	1	CCCCGAAGGGCATATTTATCTC	OP_R133	1	TGTGCGTTATTGCATGTATCGTAT--CCCCGAAGGGCATATTTATCTC	OP_F103-OP_R133	1
19572899	Li et al. 2009	Arch519F - SDArch1378-aA20	TGYCAGCCGCCGCGGTAAHACCVGC	KP_F019	1	TGTGTGCAAGGAGCAGGGAC	OP_R004	3	TGYCAGCCGCCGCGGTAAHACCVGC--TGTGTGCAAGGAGCAGGGAC	KP_F019-OP_R004	1
22170420	Griffen et al. 2012	V4	TNAYTGGGYRTAAAG	OP_F033	1	TACYVGGGTATCTAATCC	OP_R032	1	TNAYTGGGYRTAAAG--TACYVGGGTATCTAATCC	OP_F033-OP_R032	1
29609564	Mussano et al. 2018	V1 (Gray8F) - V3 (Gray519R)	TTTGATCNTGGCTCAG	OP_F086	1	GTNTTACNGCGGCKGCTG	OP_R102	1	TTTGATCNTGGCTCAG--GTNTTACNGCGGCKGCTG	OP_F086-OP_R102	1
