# Supplementary material for: In-Silico Evaluation and Selection of the Best 16S rRNA Gene Primers for Use in Next-Generation Sequencing to Detect Oral Bacteria and Archaea.
Source: Research Square preprint supplement (doi:10.21203/rs.3.rs-516961/v1), 2021-05-24
Supplement: Supplementary file 4 [file a591cfee8c3a03ff008a2ea8.xlsx]

## Sheet: Title.Abreviatures
Additional table 20. Evaluation of primer pairs with mean lengths between 100 - 300 bp for detecting oral bacteria and archaea
Additional table 21. Evaluation of primer pairs with mean lengths between 301 - 600 bp for detecting oral bacteria and archaea
Additional table 22. Evaluation of primer pairs with mean lengths >600 bp for detecting oral bacteria and archaea
PP	Primer pair
PP_Mean_IP	Primer_pair_mean_initial_position
PP_Mean_EP	Primer_pair_mean_end_position
PP_Mode_IP	Primer_pair_mode_initial_position
PP_Mode_EP	Primer_pair_mode_end_position

## Sheet: 100-300bp
		BACTERIA												ARCHAEA
			VARIANT LEVEL			SPECIES LEVEL									VARIANT LEVEL			SPECIES LEVEL
PP_identifier	PP_type	16S_gene_region	Coverage (%)	Covered	Non_covered	Coverage (%)	Covered	Non_covered	PP_Mean_IP	PP_Mean_EP	PP_Mode_IP	PP_Mode_EP	PP_Mean_length	16S_gene_region	Coverage (%)	Covered	Non_covered	Coverage (%)	Covered	Non_covered	PP_Mean_IP	PP_Mean_EP	PP_Mode_IP	PP_Mode_EP	PP_Mean_length
KP_F020-KP_R029	Bacteria	C4-C5	89.49	199702	23441	86.87	668	101	516	804	526	814	288	-	0	0	2842	0	0	194	0	0	0	0	0
KP_F020-KP_R030	Bacteria	C4-C5	90.81	202628	20515	88.17	678	91	516	796	526	806	280	V3-C5	0.07	2	2840	0.52	1	193	469	749	469	749	280
KP_F020-KP_R033	Bacteria	C4-C5	90.51	201978	21165	87.52	673	96	516	801	526	811	285	V3-C5	0.21	6	2836	0.52	1	193	457	743	457	743	286
KP_F020-KP_R034	Bacteria	C4-C5	93.3	208192	14951	94.15	724	45	517	802	526	811	285	V3-C5	1.86	53	2789	5.67	11	183	552	838	445	731	285
KP_F020-KP_R036	Bacteria	C4-C5	90.38	201687	21456	87.52	673	96	516	803	526	813	287	V3-C5	0.21	6	2836	0.52	1	193	457	745	457	745	288
KP_F020-KP_R037	Bacteria	C4-C5	90.07	200975	22168	87.39	672	97	516	804	526	814	288	V3-C5	0.21	6	2836	0.52	1	193	457	746	457	746	289
KP_F020-OP_R066	Bacteria	C4-C5	90.19	201246	21897	88.43	680	89	516	804	526	814	288	V3-C5	0.28	8	2834	1.03	2	192	460	748	457	746	288
KP_F020-OP_R079	Bacteria	C4-C5	90.33	201573	21570	87.91	676	93	516	803	526	813	287	V3-C5	0.21	6	2836	0.52	1	193	457	745	457	745	288
KP_F020-OP_R086	Bacteria	C4-C5	90.06	200973	22170	87.13	670	99	516	800	526	810	284	-	0	0	2842	0	0	194	0	0	0	0	0
KP_F020-OP_R088	Bacteria	C4-C5	89.98	200784	22359	87.39	672	97	516	804	526	814	288	V3-C5	0.21	6	2836	0.52	1	193	457	746	457	746	289
KP_F020-OP_R119	Bacteria	C4-C5	93.03	207598	15545	94.41	726	43	517	805	526	814	288	V3-C5	1.79	51	2791	4.64	9	185	562	851	445	734	289
KP_F020-OP_R139	Bacteria	C4-C5	89.63	199993	23150	86.87	668	101	516	804	526	814	288	-	0	0	2842	0	0	194	0	0	0	0	0
KP_F044-KP_R002	Bacteria	C3-C4	93.13	207804	15339	92.46	711	58	340	532	345	541	191	-	0	0	2842	0	0	194	0	0	0	0	0
KP_F044-KP_R021	Bacteria	C3-C4	92.75	206966	16177	92.46	711	58	340	532	345	541	191	-	0	0	2842	0	0	194	0	0	0	0	0
KP_F044-KP_R022	Bacteria	C3-C4	92.6	206627	16516	87.52	673	96	340	533	345	542	192	-	0	0	2842	0	0	194	0	0	0	0	0
KP_F044-KP_R023	Bacteria	C3-C4	92.66	206758	16385	87.52	673	96	340	533	345	542	192	-	0	0	2842	0	0	194	0	0	0	0	0
KP_F044-KP_R025	Bacteria	C3-C4	92.67	206786	16357	87.78	675	94	340	533	345	542	192	-	0	0	2842	0	0	194	0	0	0	0	0
KP_F044-KP_R070	Bacteria	C3-C4	92.6	206639	16504	87.52	673	96	340	535	345	544	194	-	0	0	2842	0	0	194	0	0	0	0	0
KP_F044-KP_R071	Bacteria	C3-C4	96.62	215598	7545	95.58	735	34	340	529	332	539	189	-	0	0	2842	0	0	194	0	0	0	0	0
KP_F044-OP_R019	Bacteria	C3-C4	86.45	192919	30224	90.25	694	75	341	532	345	541	191	-	0	0	2842	0	0	194	0	0	0	0	0
KP_F044-OP_R038	Bacteria	C3-C4	92.85	207188	15955	92.46	711	58	340	531	345	540	190	-	0	0	2842	0	0	194	0	0	0	0	0
KP_F044-OP_R040	Bacteria	C3-C4	96.36	215019	8124	95.58	735	34	340	529	332	539	189	-	0	0	2842	0	0	194	0	0	0	0	0
KP_F044-OP_R043	Bacteria	C3-C4	96.58	215514	7629	95.84	737	32	340	528	332	538	188	-	0	0	2842	0	0	194	0	0	0	0	0
KP_F044-OP_R045	Bacteria	C3-C4	92.76	206996	16147	87.52	673	96	340	533	345	542	192	-	0	0	2842	0	0	194	0	0	0	0	0
KP_F044-OP_R047	Bacteria	C3-C4	86.45	192899	30244	90.25	694	75	341	532	345	541	191	-	0	0	2842	0	0	194	0	0	0	0	0
KP_F044-OP_R051	Bacteria	C3-C4	92.23	205799	17344	87.52	673	96	340	535	345	544	194	-	0	0	2842	0	0	194	0	0	0	0	0
KP_F044-OP_R100	Bacteria	C3-C4	92.34	206046	17097	87.52	673	96	340	534	345	543	193	-	0	0	2842	0	0	194	0	0	0	0	0
KP_F044-OP_R102	Bacteria	C3-C4	93.05	207643	15500	92.46	711	58	340	535	345	544	194	-	0	0	2842	0	0	194	0	0	0	0	0
KP_F044-OP_R115	Bacteria	C3-C4	92.59	206607	16536	87.52	673	96	340	535	345	544	194	-	0	0	2842	0	0	194	0	0	0	0	0
KP_F044-OP_R146	Bacteria	C3-C4	96.61	215575	7568	95.58	735	34	340	529	332	539	189	-	0	0	2842	0	0	194	0	0	0	0	0
KP_F045-KP_R002	Bacteria	C3-C4	92.86	207204	15939	86.61	666	103	342	532	347	541	189	-	0	0	2842	0	0	194	0	0	0	0	0
KP_F045-KP_R021	Bacteria	C3-C4	92.48	206370	16773	86.61	666	103	342	532	347	541	189	-	0	0	2842	0	0	194	0	0	0	0	0
KP_F045-KP_R022	Bacteria	C3-C4	92.65	206744	16399	86.09	662	107	342	533	347	542	190	-	0	0	2842	0	0	194	0	0	0	0	0
KP_F045-KP_R023	Bacteria	C3-C4	92.71	206875	16268	86.09	662	107	342	533	347	542	190	-	0	0	2842	0	0	194	0	0	0	0	0
KP_F045-KP_R025	Bacteria	C3-C4	92.72	206903	16240	86.35	664	105	342	533	347	542	190	-	0	0	2842	0	0	194	0	0	0	0	0
KP_F045-KP_R070	Bacteria	C3-C4	92.66	206756	16387	86.09	662	107	342	535	347	544	192	-	0	0	2842	0	0	194	0	0	0	0	0
KP_F045-KP_R071	Bacteria	C3-C4	96.35	215000	8143	89.73	690	79	342	529	334	539	187	-	0	0	2842	0	0	194	0	0	0	0	0
KP_F045-OP_R019	Bacteria	C3-C4	86.19	192319	30824	84.4	649	120	343	532	347	541	189	-	0	0	2842	0	0	194	0	0	0	0	0
KP_F045-OP_R038	Bacteria	C3-C4	92.58	206592	16551	86.61	666	103	342	531	347	540	188	-	0	0	2842	0	0	194	0	0	0	0	0
KP_F045-OP_R040	Bacteria	C3-C4	96.09	214422	8721	89.73	690	79	342	529	334	539	187	-	0	0	2842	0	0	194	0	0	0	0	0
KP_F045-OP_R043	Bacteria	C3-C4	96.31	214913	8230	89.99	692	77	342	528	334	538	186	-	0	0	2842	0	0	194	0	0	0	0	0
KP_F045-OP_R045	Bacteria	C3-C4	92.82	207113	16030	86.09	662	107	342	533	347	542	190	-	0	0	2842	0	0	194	0	0	0	0	0
KP_F045-OP_R047	Bacteria	C3-C4	86.18	192299	30844	84.4	649	120	343	532	347	541	189	-	0	0	2842	0	0	194	0	0	0	0	0
KP_F045-OP_R051	Bacteria	C3-C4	92.28	205914	17229	86.09	662	107	342	535	347	544	192	-	0	0	2842	0	0	194	0	0	0	0	0
KP_F045-OP_R100	Bacteria	C3-C4	92.39	206161	16982	86.09	662	107	342	534	347	543	191	-	0	0	2842	0	0	194	0	0	0	0	0
KP_F045-OP_R102	Bacteria	C3-C4	92.78	207044	16099	86.61	666	103	342	535	347	544	192	-	0	0	2842	0	0	194	0	0	0	0	0
KP_F045-OP_R115	Bacteria	C3-C4	92.64	206724	16419	86.09	662	107	342	535	347	544	192	-	0	0	2842	0	0	194	0	0	0	0	0
KP_F045-OP_R146	Bacteria	C3-C4	96.34	214977	8166	89.73	690	79	342	529	334	539	187	-	0	0	2842	0	0	194	0	0	0	0	0
KP_F046-KP_R002	Bacteria	C3-C4	93.5	208646	14497	92.46	711	58	343	532	348	541	188	-	0	0	2842	0	0	194	0	0	0	0	0
KP_F046-KP_R021	Bacteria	C3-C4	93.12	207802	15341	92.46	711	58	343	532	348	541	188	-	0	0	2842	0	0	194	0	0	0	0	0
KP_F046-KP_R022	Bacteria	C3-C4	92.97	207464	15679	87.52	673	96	343	533	348	542	189	-	0	0	2842	0	0	194	0	0	0	0	0
KP_F046-KP_R023	Bacteria	C3-C4	93.03	207595	15548	87.52	673	96	343	533	348	542	189	-	0	0	2842	0	0	194	0	0	0	0	0
KP_F046-KP_R025	Bacteria	C3-C4	93.04	207623	15520	87.78	675	94	343	533	348	542	189	-	0	0	2842	0	0	194	0	0	0	0	0
KP_F046-KP_R070	Bacteria	C3-C4	92.98	207478	15665	87.52	673	96	343	535	348	544	191	-	0	0	2842	0	0	194	0	0	0	0	0
KP_F046-KP_R071	Bacteria	C3-C4	97.01	216469	6674	95.58	735	34	343	529	335	539	186	-	0	0	2842	0	0	194	0	0	0	0	0
KP_F046-OP_R019	Bacteria	C3-C4	86.8	193697	29446	90.25	694	75	344	532	348	541	188	-	0	0	2842	0	0	194	0	0	0	0	0
KP_F046-OP_R038	Bacteria	C3-C4	93.22	208025	15118	92.46	711	58	343	531	348	540	187	-	0	0	2842	0	0	194	0	0	0	0	0
KP_F046-OP_R040	Bacteria	C3-C4	96.75	215886	7257	95.58	735	34	343	529	335	539	186	-	0	0	2842	0	0	194	0	0	0	0	0
KP_F046-OP_R043	Bacteria	C3-C4	96.97	216382	6761	95.84	737	32	343	528	335	538	185	-	0	0	2842	0	0	194	0	0	0	0	0
KP_F046-OP_R045	Bacteria	C3-C4	93.14	207835	15308	87.52	673	96	343	533	348	542	189	-	0	0	2842	0	0	194	0	0	0	0	0
KP_F046-OP_R047	Bacteria	C3-C4	86.79	193677	29466	90.25	694	75	344	532	348	541	188	-	0	0	2842	0	0	194	0	0	0	0	0
KP_F046-OP_R051	Bacteria	C3-C4	92.6	206632	16511	87.52	673	96	343	535	348	544	191	-	0	0	2842	0	0	194	0	0	0	0	0
KP_F046-OP_R100	Bacteria	C3-C4	92.71	206880	16263	87.52	673	96	343	534	348	543	190	-	0	0	2842	0	0	194	0	0	0	0	0
KP_F046-OP_R102	Bacteria	C3-C4	93.43	208486	14657	92.46	711	58	343	535	348	544	191	-	0	0	2842	0	0	194	0	0	0	0	0
KP_F046-OP_R115	Bacteria	C3-C4	92.97	207446	15697	87.52	673	96	343	535	348	544	191	-	0	0	2842	0	0	194	0	0	0	0	0
KP_F046-OP_R146	Bacteria	C3-C4	97	216446	6697	95.58	735	34	343	529	335	539	186	-	0	0	2842	0	0	194	0	0	0	0	0
KP_F047-KP_R002	Bacteria	C3-C4	93.71	209111	14032	92.59	712	57	343	532	348	541	188	-	0	0	2842	0	0	194	0	0	0	0	0
KP_F047-KP_R021	Bacteria	C3-C4	93.33	208266	14877	92.59	712	57	343	532	348	541	188	-	0	0	2842	0	0	194	0	0	0	0	0
KP_F047-KP_R022	Bacteria	C3-C4	93.17	207913	15230	87.52	673	96	343	533	348	542	189	-	0	0	2842	0	0	194	0	0	0	0	0
KP_F047-KP_R023	Bacteria	C3-C4	93.23	208044	15099	87.52	673	96	343	533	348	542	189	-	0	0	2842	0	0	194	0	0	0	0	0
KP_F047-KP_R025	Bacteria	C3-C4	93.25	208086	15057	87.91	676	93	343	533	348	542	189	-	0	0	2842	0	0	194	0	0	0	0	0
KP_F047-KP_R070	Bacteria	C3-C4	93.18	207926	15217	87.52	673	96	343	535	348	544	191	-	0	0	2842	0	0	194	0	0	0	0	0
KP_F047-KP_R071	Bacteria	C3-C4	97.22	216947	6196	95.71	736	33	343	529	335	539	186	-	0	0	2842	0	0	194	0	0	0	0	0
KP_F047-OP_R019	Bacteria	C3-C4	87	194131	29012	90.38	695	74	344	532	348	541	188	-	0	0	2842	0	0	194	0	0	0	0	0
KP_F047-OP_R038	Bacteria	C3-C4	93.43	208489	14654	92.59	712	57	343	531	348	540	187	-	0	0	2842	0	0	194	0	0	0	0	0
KP_F047-OP_R040	Bacteria	C3-C4	96.96	216363	6780	95.71	736	33	343	529	335	539	186	-	0	0	2842	0	0	194	0	0	0	0	0
KP_F047-OP_R043	Bacteria	C3-C4	97.18	216860	6283	95.97	738	31	343	528	335	538	185	-	0	0	2842	0	0	194	0	0	0	0	0
KP_F047-OP_R045	Bacteria	C3-C4	93.34	208284	14859	87.52	673	96	343	533	348	542	189	-	0	0	2842	0	0	194	0	0	0	0	0
KP_F047-OP_R047	Bacteria	C3-C4	86.99	194111	29032	90.38	695	74	344	532	348	541	188	-	0	0	2842	0	0	194	0	0	0	0	0
KP_F047-OP_R051	Bacteria	C3-C4	92.8	207079	16064	87.52	673	96	343	535	348	544	191	-	0	0	2842	0	0	194	0	0	0	0	0
KP_F047-OP_R100	Bacteria	C3-C4	92.91	207328	15815	87.52	673	96	343	534	348	543	190	-	0	0	2842	0	0	194	0	0	0	0	0
KP_F047-OP_R102	Bacteria	C3-C4	93.64	208950	14193	92.59	712	57	343	535	348	544	191	-	0	0	2842	0	0	194	0	0	0	0	0
KP_F047-OP_R115	Bacteria	C3-C4	93.17	207894	15249	87.52	673	96	343	535	348	544	191	-	0	0	2842	0	0	194	0	0	0	0	0
KP_F047-OP_R146	Bacteria	C3-C4	97.21	216924	6219	95.71	736	33	343	529	335	539	186	-	0	0	2842	0	0	194	0	0	0	0	0
KP_F048-KP_R002	Bacteria	C3-C4	93.76	209220	13923	94.54	727	42	345	532	350	541	186	-	0	0	2842	0	0	194	0	0	0	0	0
KP_F048-KP_R021	Bacteria	C3-C4	93.38	208374	14769	94.54	727	42	345	532	350	541	186	-	0	0	2842	0	0	194	0	0	0	0	0
KP_F048-KP_R022	Bacteria	C3-C4	93.21	207987	15156	88.95	684	85	345	533	350	542	187	-	0	0	2842	0	0	194	0	0	0	0	0
KP_F048-KP_R023	Bacteria	C3-C4	93.27	208119	15024	88.95	684	85	345	533	350	542	187	-	0	0	2842	0	0	194	0	0	0	0	0
KP_F048-KP_R025	Bacteria	C3-C4	93.28	208147	14996	89.21	686	83	345	533	350	542	187	-	0	0	2842	0	0	194	0	0	0	0	0
KP_F048-KP_R070	Bacteria	C3-C4	93.21	208002	15141	88.95	684	85	345	535	350	544	189	-	0	0	2842	0	0	194	0	0	0	0	0
KP_F048-KP_R071	Bacteria	C3-C4	97.27	217051	6092	97.66	751	18	345	529	337	539	184	-	0	0	2842	0	0	194	0	0	0	0	0
KP_F048-OP_R019	Bacteria	C3-C4	87.05	194252	28891	92.33	710	59	346	532	350	541	186	-	0	0	2842	0	0	194	0	0	0	0	0
KP_F048-OP_R038	Bacteria	C3-C4	93.48	208597	14546	94.54	727	42	345	531	350	540	185	-	0	0	2842	0	0	194	0	0	0	0	0
KP_F048-OP_R040	Bacteria	C3-C4	97.01	216467	6676	97.66	751	18	345	529	337	539	184	-	0	0	2842	0	0	194	0	0	0	0	0
KP_F048-OP_R043	Bacteria	C3-C4	97.23	216964	6179	97.92	753	16	345	528	337	538	183	-	0	0	2842	0	0	194	0	0	0	0	0
KP_F048-OP_R045	Bacteria	C3-C4	93.37	208359	14784	88.95	684	85	345	533	350	542	187	-	0	0	2842	0	0	194	0	0	0	0	0
KP_F048-OP_R047	Bacteria	C3-C4	87.04	194232	28911	92.33	710	59	346	532	350	541	186	-	0	0	2842	0	0	194	0	0	0	0	0
KP_F048-OP_R051	Bacteria	C3-C4	92.83	207154	15989	88.95	684	85	345	535	350	544	189	-	0	0	2842	0	0	194	0	0	0	0	0
KP_F048-OP_R100	Bacteria	C3-C4	92.95	207402	15741	88.95	684	85	345	534	350	543	188	-	0	0	2842	0	0	194	0	0	0	0	0
KP_F048-OP_R102	Bacteria	C3-C4	93.69	209060	14083	94.54	727	42	345	535	350	544	189	-	0	0	2842	0	0	194	0	0	0	0	0
KP_F048-OP_R115	Bacteria	C3-C4	93.2	207970	15173	88.95	684	85	345	535	350	544	189	-	0	0	2842	0	0	194	0	0	0	0	0
KP_F048-OP_R146	Bacteria	C3-C4	97.26	217028	6115	97.66	751	18	345	529	337	539	184	-	0	0	2842	0	0	194	0	0	0	0	0
KP_F049-KP_R002	Bacteria	C3-C4	92.82	207128	16015	85.18	655	114	349	532	354	541	182	-	0	0	2842	0	0	194	0	0	0	0	0
KP_F049-KP_R021	Bacteria	C3-C4	92.45	206296	16847	85.18	655	114	349	532	354	541	182	-	0	0	2842	0	0	194	0	0	0	0	0
KP_F049-KP_R022	Bacteria	C3-C4	92.62	206665	16478	84.66	651	118	349	533	354	542	183	-	0	0	2842	0	0	194	0	0	0	0	0
KP_F049-KP_R023	Bacteria	C3-C4	92.67	206798	16345	84.66	651	118	349	533	354	542	183	-	0	0	2842	0	0	194	0	0	0	0	0
KP_F049-KP_R025	Bacteria	C3-C4	92.69	206826	16317	84.92	653	116	349	533	354	542	183	-	0	0	2842	0	0	194	0	0	0	0	0
KP_F049-KP_R070	Bacteria	C3-C4	92.62	206682	16461	84.66	651	118	349	535	354	544	185	-	0	0	2842	0	0	194	0	0	0	0	0
KP_F049-KP_R071	Bacteria	C3-C4	96.32	214939	8204	88.17	678	91	349	529	341	539	180	-	0	0	2842	0	0	194	0	0	0	0	0
KP_F049-OP_R019	Bacteria	C3-C4	86.18	192301	30842	83.36	641	128	350	532	354	541	182	-	0	0	2842	0	0	194	0	0	0	0	0
KP_F049-OP_R038	Bacteria	C3-C4	92.55	206519	16624	85.18	655	114	349	531	354	540	181	-	0	0	2842	0	0	194	0	0	0	0	0
KP_F049-OP_R040	Bacteria	C3-C4	96.07	214365	8778	88.17	678	91	349	529	341	539	180	-	0	0	2842	0	0	194	0	0	0	0	0
KP_F049-OP_R043	Bacteria	C3-C4	96.29	214855	8288	88.43	680	89	349	528	341	538	179	-	0	0	2842	0	0	194	0	0	0	0	0
KP_F049-OP_R045	Bacteria	C3-C4	92.78	207033	16110	84.66	651	118	349	533	354	542	183	-	0	0	2842	0	0	194	0	0	0	0	0
KP_F049-OP_R047	Bacteria	C3-C4	86.17	192281	30862	83.36	641	128	350	532	354	541	182	-	0	0	2842	0	0	194	0	0	0	0	0
KP_F049-OP_R051	Bacteria	C3-C4	92.25	205842	17301	84.66	651	118	349	535	354	544	185	-	0	0	2842	0	0	194	0	0	0	0	0
KP_F049-OP_R100	Bacteria	C3-C4	92.35	206082	17061	84.66	651	118	349	534	354	543	184	-	0	0	2842	0	0	194	0	0	0	0	0
KP_F049-OP_R102	Bacteria	C3-C4	92.75	206973	16170	85.18	655	114	349	535	354	544	185	-	0	0	2842	0	0	194	0	0	0	0	0
KP_F049-OP_R115	Bacteria	C3-C4	92.61	206650	16493	84.66	651	118	349	535	354	544	185	-	0	0	2842	0	0	194	0	0	0	0	0
KP_F049-OP_R146	Bacteria	C3-C4	96.31	214916	8227	88.17	678	91	349	529	341	539	180	-	0	0	2842	0	0	194	0	0	0	0	0
KP_F050-KP_R002	Bacteria	C3-C4	88.41	197273	25870	87	669	100	375	532	379	541	158	-	0	0	2842	0	0	194	0	0	0	0	0
KP_F050-KP_R021	Bacteria	C3-C4	88.05	196475	26668	87	669	100	375	532	379	541	158	-	0	0	2842	0	0	194	0	0	0	0	0
KP_F050-KP_R022	Bacteria	C3-C4	87.87	196069	27074	81.53	627	142	375	533	379	542	159	-	0	0	2842	0	0	194	0	0	0	0	0
KP_F050-KP_R023	Bacteria	C3-C4	87.92	196191	26952	81.53	627	142	375	533	379	542	159	-	0	0	2842	0	0	194	0	0	0	0	0
KP_F050-KP_R025	Bacteria	C3-C4	87.93	196219	26924	81.79	629	140	375	533	379	542	159	-	0	0	2842	0	0	194	0	0	0	0	0
KP_F050-KP_R070	Bacteria	C3-C4	87.88	196095	27048	81.53	627	142	375	535	379	544	161	-	0	0	2842	0	0	194	0	0	0	0	0
KP_F050-KP_R071	Bacteria	C3-C4	91.69	204593	18550	89.99	692	77	375	530	379	539	155	-	0	0	2842	0	0	194	0	0	0	0	0
KP_F050-OP_R019	Bacteria	C3-C4	81.8	182526	40617	85.44	657	112	376	533	379	541	157	-	0	0	2842	0	0	194	0	0	0	0	0
KP_F050-OP_R038	Bacteria	C3-C4	88.14	196680	26463	87	669	100	375	531	379	540	157	-	0	0	2842	0	0	194	0	0	0	0	0
KP_F050-OP_R040	Bacteria	C3-C4	91.44	204040	19103	89.99	692	77	375	530	379	539	155	-	0	0	2842	0	0	194	0	0	0	0	0
KP_F050-OP_R043	Bacteria	C3-C4	91.62	204448	18695	89.99	692	77	375	529	379	538	154	-	0	0	2842	0	0	194	0	0	0	0	0
KP_F050-OP_R045	Bacteria	C3-C4	88.02	196416	26727	81.53	627	142	375	533	379	542	159	-	0	0	2842	0	0	194	0	0	0	0	0
KP_F050-OP_R047	Bacteria	C3-C4	81.79	182507	40636	85.44	657	112	376	533	379	541	157	-	0	0	2842	0	0	194	0	0	0	0	0
KP_F050-OP_R051	Bacteria	C3-C4	87.52	195294	27849	81.53	627	142	375	535	379	544	161	-	0	0	2842	0	0	194	0	0	0	0	0
KP_F050-OP_R100	Bacteria	C3-C4	87.62	195524	27619	81.53	627	142	375	534	379	543	160	-	0	0	2842	0	0	194	0	0	0	0	0
KP_F050-OP_R102	Bacteria	C3-C4	88.34	197127	26016	87	669	100	375	535	379	544	161	-	0	0	2842	0	0	194	0	0	0	0	0
KP_F050-OP_R115	Bacteria	C3-C4	87.86	196063	27080	81.53	627	142	375	535	379	544	161	-	0	0	2842	0	0	194	0	0	0	0	0
KP_F050-OP_R146	Bacteria	C3-C4	91.68	204571	18572	89.99	692	77	375	530	379	539	155	-	0	0	2842	0	0	194	0	0	0	0	0
KP_F051-KP_R029	Bacteria	C4-C5	89.53	199783	23360	87.13	670	99	512	804	522	814	292	-	0	0	2842	0	0	194	0	0	0	0	0
KP_F051-KP_R030	Bacteria	C4-C5	90.84	202711	20432	88.43	680	89	512	796	522	806	284	-	0	0	2842	0	0	194	0	0	0	0	0
KP_F051-KP_R031	Bacteria	C4-C5	96.98	216410	6733	99.09	762	7	512	800	522	810	288	V3-C5	51.72	1470	1372	63.92	124	70	450	739	453	742	289
KP_F051-KP_R032	Bacteria	C4-C5	93.89	209518	13625	97.66	751	18	513	801	522	810	288	V3-C5	51.76	1471	1371	63.92	124	70	450	739	453	742	289
KP_F051-KP_R033	Bacteria	C4-C5	90.55	202056	21087	87.78	675	94	512	801	522	811	289	V3-C5	0.21	6	2836	0.52	1	193	453	743	453	743	290
KP_F051-KP_R034	Bacteria	C4-C5	93.37	208339	14804	94.8	729	40	513	802	522	811	289	V3-C5	1.16	33	2809	3.61	7	187	438	728	441	731	290
KP_F051-KP_R035	Bacteria	C4-C5	93.63	208925	14218	97.53	750	19	513	804	522	813	291	V3-C5	51.69	1469	1373	63.92	124	70	450	742	453	745	292
KP_F051-KP_R036	Bacteria	C4-C5	90.42	201768	21375	87.78	675	94	512	803	522	813	291	V3-C5	0.21	6	2836	0.52	1	193	453	745	453	745	292
KP_F051-KP_R037	Bacteria	C4-C5	90.1	201057	22086	87.65	674	95	512	804	522	814	292	V3-C5	0.21	6	2836	0.52	1	193	453	746	453	746	293
KP_F051-KP_R038	Bacteria	C4-C5	93.38	208363	14780	97.27	748	21	513	805	522	814	292	V3-C5	51.58	1466	1376	62.89	122	72	450	743	453	746	293
KP_F051-OP_R010	Bacteria	C4-C5	93.38	208368	14775	97.27	748	21	513	805	522	814	292	V3-C5	51.58	1466	1376	62.89	122	72	450	743	453	746	293
KP_F051-OP_R014	Bacteria	C4-C5	93.38	208372	14771	97.27	748	21	513	805	522	814	292	V3-C5	51.62	1467	1375	62.89	122	72	450	743	453	746	293
KP_F051-OP_R020	Bacteria	C4-C5	93.72	209134	14009	97.53	750	19	513	804	522	813	291	V3-C5	51.69	1469	1373	63.92	124	70	450	742	453	745	292
KP_F051-OP_R032	Bacteria	C4-C5	93.88	209477	13666	97.27	748	21	513	801	522	810	288	V3-C5	51.72	1470	1372	63.92	124	70	450	739	453	742	289
KP_F051-OP_R036	Bacteria	C4-C5	93.47	208570	14573	97.4	749	20	513	805	522	814	292	V3-C5	51.62	1467	1375	62.89	122	72	450	743	453	746	293
KP_F051-OP_R048	Bacteria	C4-C5	93.29	208167	14976	97.27	748	21	513	805	522	814	292	V3-C5	51.62	1467	1375	62.89	122	72	450	743	453	746	293
KP_F051-OP_R066	Bacteria	C4-C5	90.22	201331	21812	88.69	682	87	512	804	522	814	292	V3-C5	0.21	6	2836	0.52	1	193	453	746	453	746	293
KP_F051-OP_R070	Bacteria	C4-C5	96.71	215804	7339	98.96	761	8	512	803	522	813	291	V3-C5	51.69	1469	1373	63.92	124	70	450	742	453	745	292
KP_F051-OP_R079	Bacteria	C4-C5	93.41	208435	14708	89.21	686	83	511	802	522	813	291	V3-C5	0.21	6	2836	0.52	1	193	453	745	453	745	292
KP_F051-OP_R086	Bacteria	C4-C5	90.1	201052	22091	87.39	672	97	512	800	522	810	288	-	0	0	2842	0	0	194	0	0	0	0	0
KP_F051-OP_R088	Bacteria	C4-C5	90.02	200865	22278	87.65	674	95	512	804	522	814	292	V3-C5	0.21	6	2836	0.52	1	193	453	746	453	746	293
KP_F051-OP_R119	Bacteria	C4-C5	96.13	214504	8639	95.97	738	31	512	804	522	814	292	V3-C5	1.09	31	2811	2.58	5	189	447	740	441	734	293
KP_F051-OP_R139	Bacteria	C4-C5	89.66	200074	23069	87.13	670	99	512	804	522	814	292	-	0	0	2842	0	0	194	0	0	0	0	0
KP_F052-KP_R029	Bacteria	C4-C5	89.19	199033	24110	86.87	668	101	513	804	523	814	291	-	0	0	2842	0	0	194	0	0	0	0	0
KP_F052-KP_R030	Bacteria	C4-C5	90.5	201949	21194	88.17	678	91	513	796	523	806	283	-	0	0	2842	0	0	194	0	0	0	0	0
KP_F052-KP_R031	Bacteria	C4-C5	93.25	208077	15066	95.97	738	31	514	801	523	810	287	V3-C5	3.24	92	2750	9.79	19	175	446	733	443	730	287
KP_F052-KP_R032	Bacteria	C4-C5	93.22	208004	15139	95.58	735	34	514	801	523	810	287	V3-C5	3.24	92	2750	9.79	19	175	446	733	443	730	287
KP_F052-KP_R033	Bacteria	C4-C5	90.21	201297	21846	87.52	673	96	513	801	523	811	288	-	0	0	2842	0	0	194	0	0	0	0	0
KP_F052-KP_R034	Bacteria	C4-C5	92.99	207491	15652	94.15	724	45	514	802	523	811	288	-	0	0	2842	0	0	194	0	0	0	0	0
KP_F052-KP_R035	Bacteria	C4-C5	92.95	207413	15730	95.45	734	35	514	804	523	813	290	V3-C5	3.24	92	2750	9.79	19	175	446	736	443	733	290
KP_F052-KP_R036	Bacteria	C4-C5	90.08	201008	22135	87.52	673	96	513	803	523	813	290	-	0	0	2842	0	0	194	0	0	0	0	0
KP_F052-KP_R037	Bacteria	C4-C5	89.76	200302	22841	87.39	672	97	513	804	523	814	291	-	0	0	2842	0	0	194	0	0	0	0	0
KP_F052-KP_R038	Bacteria	C4-C5	92.72	206905	16238	95.32	733	36	514	805	523	814	291	V3-C5	3.24	92	2750	9.79	19	175	446	737	443	734	291
KP_F052-OP_R010	Bacteria	C4-C5	92.72	206910	16233	95.32	733	36	514	805	523	814	291	V3-C5	3.24	92	2750	9.79	19	175	446	737	443	734	291
KP_F052-OP_R014	Bacteria	C4-C5	92.73	206914	16229	95.32	733	36	514	805	523	814	291	V3-C5	3.24	92	2750	9.79	19	175	446	737	443	734	291
KP_F052-OP_R020	Bacteria	C4-C5	93.04	207621	15522	95.45	734	35	514	804	523	813	290	V3-C5	3.24	92	2750	9.79	19	175	446	736	443	733	290
KP_F052-OP_R032	Bacteria	C4-C5	93.2	207963	15180	95.19	732	37	514	801	523	810	287	V3-C5	3.24	92	2750	9.79	19	175	446	733	443	730	287
KP_F052-OP_R036	Bacteria	C4-C5	92.76	206995	16148	95.32	733	36	514	805	523	814	291	V3-C5	3.24	92	2750	9.79	19	175	446	737	443	734	291
KP_F052-OP_R048	Bacteria	C4-C5	92.64	206710	16433	95.32	733	36	514	805	523	814	291	V3-C5	3.24	92	2750	9.79	19	175	446	737	443	734	291
KP_F052-OP_R066	Bacteria	C4-C5	89.89	200573	22570	88.43	680	89	513	804	523	814	291	-	0	0	2842	0	0	194	0	0	0	0	0
KP_F052-OP_R070	Bacteria	C4-C5	92.98	207490	15653	95.84	737	32	514	804	523	813	290	V3-C5	3.24	92	2750	9.79	19	175	446	736	443	733	290
KP_F052-OP_R079	Bacteria	C4-C5	90.03	200894	22249	87.91	676	93	513	803	523	813	290	-	0	0	2842	0	0	194	0	0	0	0	0
KP_F052-OP_R086	Bacteria	C4-C5	89.76	200296	22847	87.13	670	99	513	800	523	810	287	-	0	0	2842	0	0	194	0	0	0	0	0
KP_F052-OP_R088	Bacteria	C4-C5	89.68	200111	23032	87.39	672	97	513	804	523	814	291	-	0	0	2842	0	0	194	0	0	0	0	0
KP_F052-OP_R119	Bacteria	C4-C5	92.72	206904	16239	94.41	726	43	514	805	523	814	291	-	0	0	2842	0	0	194	0	0	0	0	0
KP_F052-OP_R139	Bacteria	C4-C5	89.33	199324	23819	86.87	668	101	513	804	523	814	291	-	0	0	2842	0	0	194	0	0	0	0	0
KP_F054-KP_R029	Bacteria	C4-C5	89.36	199402	23741	86.87	668	101	514	804	524	814	290	-	0	0	2842	0	0	194	0	0	0	0	0
KP_F054-KP_R030	Bacteria	C4-C5	90.67	202324	20819	88.17	678	91	514	796	524	806	282	-	0	0	2842	0	0	194	0	0	0	0	0
KP_F054-KP_R031	Bacteria	C4-C5	93.42	208465	14678	95.97	738	31	515	801	524	810	286	V3-C5	3.24	92	2750	9.79	19	175	447	733	444	730	286
KP_F054-KP_R032	Bacteria	C4-C5	93.39	208392	14751	95.58	735	34	515	801	524	810	286	V3-C5	3.24	92	2750	9.79	19	175	447	733	444	730	286
KP_F054-KP_R033	Bacteria	C4-C5	90.38	201675	21468	87.52	673	96	514	801	524	811	287	-	0	0	2842	0	0	194	0	0	0	0	0
KP_F054-KP_R034	Bacteria	C4-C5	93.16	207879	15264	94.15	724	45	515	802	524	811	287	-	0	0	2842	0	0	194	0	0	0	0	0
KP_F054-KP_R035	Bacteria	C4-C5	93.12	207799	15344	95.45	734	35	515	804	524	813	289	V3-C5	3.24	92	2750	9.79	19	175	447	736	444	733	289
KP_F054-KP_R036	Bacteria	C4-C5	90.25	201384	21759	87.52	673	96	514	803	524	813	289	-	0	0	2842	0	0	194	0	0	0	0	0
KP_F054-KP_R037	Bacteria	C4-C5	89.93	200674	22469	87.39	672	97	514	804	524	814	290	-	0	0	2842	0	0	194	0	0	0	0	0
KP_F054-KP_R038	Bacteria	C4-C5	92.89	207287	15856	95.32	733	36	515	805	524	814	290	V3-C5	3.24	92	2750	9.79	19	175	447	737	444	734	290
KP_F054-OP_R010	Bacteria	C4-C5	92.9	207292	15851	95.32	733	36	515	805	524	814	290	V3-C5	3.24	92	2750	9.79	19	175	447	737	444	734	290
KP_F054-OP_R014	Bacteria	C4-C5	92.9	207296	15847	95.32	733	36	515	805	524	814	290	V3-C5	3.24	92	2750	9.79	19	175	447	737	444	734	290
KP_F054-OP_R020	Bacteria	C4-C5	93.22	208007	15136	95.45	734	35	515	804	524	813	289	V3-C5	3.24	92	2750	9.79	19	175	447	736	444	733	289
KP_F054-OP_R032	Bacteria	C4-C5	93.37	208351	14792	95.19	732	37	515	801	524	810	286	V3-C5	3.24	92	2750	9.79	19	175	447	733	444	730	286
KP_F054-OP_R036	Bacteria	C4-C5	92.93	207377	15766	95.32	733	36	515	805	524	814	290	V3-C5	3.24	92	2750	9.79	19	175	447	737	444	734	290
KP_F054-OP_R048	Bacteria	C4-C5	92.81	207092	16051	95.32	733	36	515	805	524	814	290	V3-C5	3.24	92	2750	9.79	19	175	447	737	444	734	290
KP_F054-OP_R066	Bacteria	C4-C5	90.05	200945	22198	88.43	680	89	514	804	524	814	290	-	0	0	2842	0	0	194	0	0	0	0	0
KP_F054-OP_R070	Bacteria	C4-C5	93.16	207876	15267	95.84	737	32	515	804	524	813	289	V3-C5	3.24	92	2750	9.79	19	175	447	736	444	733	289
KP_F054-OP_R079	Bacteria	C4-C5	90.2	201270	21873	87.91	676	93	514	803	524	813	289	-	0	0	2842	0	0	194	0	0	0	0	0
KP_F054-OP_R086	Bacteria	C4-C5	89.93	200671	22472	87.13	670	99	514	800	524	810	286	-	0	0	2842	0	0	194	0	0	0	0	0
KP_F054-OP_R088	Bacteria	C4-C5	89.84	200483	22660	87.39	672	97	514	804	524	814	290	-	0	0	2842	0	0	194	0	0	0	0	0
KP_F054-OP_R119	Bacteria	C4-C5	92.89	207286	15857	94.41	726	43	515	805	524	814	290	-	0	0	2842	0	0	194	0	0	0	0	0
KP_F054-OP_R139	Bacteria	C4-C5	89.49	199693	23450	86.87	668	101	514	804	524	814	290	-	0	0	2842	0	0	194	0	0	0	0	0
KP_F055-KP_R029	Bacteria	C4-C5	89.02	198643	24500	81.66	628	141	515	804	525	814	289	-	0	0	2842	0	0	194	0	0	0	0	0
KP_F055-KP_R030	Bacteria	C4-C5	90.32	201554	21589	82.83	637	132	515	796	525	806	281	-	0	0	2842	0	0	194	0	0	0	0	0
KP_F055-KP_R031	Bacteria	C4-C5	93.08	207693	15450	90.64	697	72	516	801	525	810	285	V3-C5	1.83	52	2790	4.12	8	186	451	736	461	746	285
KP_F055-KP_R032	Bacteria	C4-C5	93.04	207620	15523	90.25	694	75	516	801	525	810	285	V3-C5	1.83	52	2790	4.12	8	186	451	736	461	746	285
KP_F055-KP_R033	Bacteria	C4-C5	90.04	200910	22233	82.18	632	137	515	801	525	811	286	-	0	0	2842	0	0	194	0	0	0	0	0
KP_F055-KP_R034	Bacteria	C4-C5	92.82	207112	16031	88.82	683	86	516	802	525	811	286	-	0	0	2842	0	0	194	0	0	0	0	0
KP_F055-KP_R035	Bacteria	C4-C5	92.78	207031	16112	90.12	693	76	516	804	525	813	288	V3-C5	1.83	52	2790	4.12	8	186	451	739	461	749	288
KP_F055-KP_R036	Bacteria	C4-C5	89.91	200619	22524	82.18	632	137	515	803	525	813	288	-	0	0	2842	0	0	194	0	0	0	0	0
KP_F055-KP_R037	Bacteria	C4-C5	89.59	199910	23233	82.18	632	137	515	804	525	814	289	-	0	0	2842	0	0	194	0	0	0	0	0
KP_F055-KP_R038	Bacteria	C4-C5	92.55	206519	16624	90.12	693	76	516	805	525	814	289	V3-C5	1.83	52	2790	4.12	8	186	451	740	461	750	289
KP_F055-OP_R010	Bacteria	C4-C5	92.55	206524	16619	90.12	693	76	516	805	525	814	289	V3-C5	1.83	52	2790	4.12	8	186	451	740	461	750	289
KP_F055-OP_R014	Bacteria	C4-C5	92.55	206528	16615	90.12	693	76	516	805	525	814	289	V3-C5	1.83	52	2790	4.12	8	186	451	740	461	750	289
KP_F055-OP_R020	Bacteria	C4-C5	92.87	207238	15905	90.12	693	76	516	804	525	813	288	V3-C5	1.83	52	2790	4.12	8	186	451	739	461	749	288
KP_F055-OP_R032	Bacteria	C4-C5	93.02	207579	15564	89.86	691	78	516	801	525	810	285	V3-C5	1.83	52	2790	4.12	8	186	451	736	461	746	285
KP_F055-OP_R036	Bacteria	C4-C5	92.59	206609	16534	90.12	693	76	516	805	525	814	289	V3-C5	1.83	52	2790	4.12	8	186	451	740	461	750	289
KP_F055-OP_R048	Bacteria	C4-C5	92.46	206325	16818	90.12	693	76	516	805	525	814	289	V3-C5	1.83	52	2790	4.12	8	186	451	740	461	750	289
KP_F055-OP_R066	Bacteria	C4-C5	89.71	200179	22964	83.22	640	129	515	804	525	814	289	-	0	0	2842	0	0	194	0	0	0	0	0
KP_F055-OP_R070	Bacteria	C4-C5	92.81	207108	16035	90.51	696	73	516	804	525	813	288	V3-C5	1.83	52	2790	4.12	8	186	451	739	461	749	288
KP_F055-OP_R079	Bacteria	C4-C5	89.85	200506	22637	82.57	635	134	515	803	525	813	288	-	0	0	2842	0	0	194	0	0	0	0	0
KP_F055-OP_R086	Bacteria	C4-C5	89.59	199907	23236	81.79	629	140	515	800	525	810	285	-	0	0	2842	0	0	194	0	0	0	0	0
KP_F055-OP_R088	Bacteria	C4-C5	89.5	199720	23423	82.18	632	137	515	804	525	814	289	-	0	0	2842	0	0	194	0	0	0	0	0
KP_F055-OP_R119	Bacteria	C4-C5	92.55	206519	16624	89.21	686	83	516	805	525	814	289	-	0	0	2842	0	0	194	0	0	0	0	0
KP_F055-OP_R139	Bacteria	C4-C5	89.15	198931	24212	81.66	628	141	515	804	525	814	289	-	0	0	2842	0	0	194	0	0	0	0	0
KP_F056-KP_R029	Bacteria	C4-C5	88.9	198373	24770	85.7	659	110	560	804	570	814	244	-	0	0	2842	0	0	194	0	0	0	0	0
KP_F056-KP_R030	Bacteria	C4-C5	90.21	201289	21854	87	669	100	560	796	570	806	236	C4-C5	0.07	2	2840	0.52	1	193	513	749	513	749	236
KP_F056-KP_R031	Bacteria	C4-C5	96.33	214951	8192	97.66	751	18	560	800	570	810	240	V3-C5	4.33	123	2719	8.76	17	177	524	771	489	730	247
KP_F056-KP_R032	Bacteria	C4-C5	93.25	208071	15072	96.23	740	29	561	801	570	810	240	V3-C5	4.33	123	2719	8.76	17	177	524	771	489	730	247
KP_F056-KP_R033	Bacteria	C4-C5	89.92	200640	22503	86.35	664	105	560	801	570	811	241	-	0	0	2842	0	0	194	0	0	0	0	0
KP_F056-KP_R034	Bacteria	C4-C5	92.72	206901	16242	93.37	718	51	561	802	570	811	241	V3-C5	0.77	22	2820	0.52	1	193	489	731	489	731	242
KP_F056-KP_R035	Bacteria	C4-C5	92.98	207486	15657	96.1	739	30	561	804	570	813	243	V3-C5	4.33	123	2719	8.76	17	177	524	774	489	733	250
KP_F056-KP_R036	Bacteria	C4-C5	89.79	200365	22778	86.35	664	105	560	803	570	813	243	-	0	0	2842	0	0	194	0	0	0	0	0
KP_F056-KP_R037	Bacteria	C4-C5	89.47	199651	23492	86.22	663	106	560	804	570	814	244	-	0	0	2842	0	0	194	0	0	0	0	0
KP_F056-KP_R038	Bacteria	C4-C5	92.73	206925	16218	95.84	737	32	561	805	570	814	244	V3-C5	4.33	123	2719	8.76	17	177	524	775	489	734	251
KP_F056-OP_R010	Bacteria	C4-C5	92.73	206930	16213	95.84	737	32	561	805	570	814	244	V3-C5	4.33	123	2719	8.76	17	177	524	775	489	734	251
KP_F056-OP_R014	Bacteria	C4-C5	92.74	206934	16209	95.84	737	32	561	805	570	814	244	V3-C5	4.33	123	2719	8.76	17	177	524	775	489	734	251
KP_F056-OP_R020	Bacteria	C4-C5	93.08	207699	15444	96.1	739	30	561	804	570	813	243	V3-C5	4.33	123	2719	8.76	17	177	524	774	489	733	250
KP_F056-OP_R032	Bacteria	C4-C5	93.23	208030	15113	95.84	737	32	561	801	570	810	240	V3-C5	3.8	108	2734	5.15	10	184	492	732	489	730	241
KP_F056-OP_R036	Bacteria	C4-C5	92.82	207127	16016	95.97	738	31	561	805	570	814	244	V3-C5	4.33	123	2719	8.76	17	177	524	775	489	734	251
KP_F056-OP_R048	Bacteria	C4-C5	92.64	206725	16418	95.84	737	32	561	805	570	814	244	V3-C5	4.33	123	2719	8.76	17	177	524	775	489	734	251
KP_F056-OP_R066	Bacteria	C4-C5	89.59	199922	23221	87.26	671	98	560	804	570	814	244	C4-C5	0.07	2	2840	0.52	1	193	513	757	513	757	244
KP_F056-OP_R070	Bacteria	C4-C5	96.06	214353	8790	97.53	750	19	560	803	570	813	243	V3-C5	4.33	123	2719	8.76	17	177	524	774	489	733	250
KP_F056-OP_R079	Bacteria	C4-C5	92.77	207016	16127	87.78	675	94	560	802	570	813	243	-	0	0	2842	0	0	194	0	0	0	0	0
KP_F056-OP_R086	Bacteria	C4-C5	89.47	199636	23507	85.96	661	108	560	800	570	810	240	-	0	0	2842	0	0	194	0	0	0	0	0
KP_F056-OP_R088	Bacteria	C4-C5	89.38	199455	23688	86.22	663	106	560	804	570	814	244	-	0	0	2842	0	0	194	0	0	0	0	0
KP_F056-OP_R119	Bacteria	C4-C5	95.48	213064	10079	94.54	727	42	560	804	570	814	244	V3-C5	0.77	22	2820	0.52	1	193	489	734	489	734	245
KP_F056-OP_R139	Bacteria	C4-C5	89.03	198663	24480	85.7	659	110	560	804	570	814	244	-	0	0	2842	0	0	194	0	0	0	0	0
KP_F057-KP_R039	Bacteria	C5-C6	70	156209	66934	75.94	584	185	782	925	791	935	143	-	0	0	2842	0	0	194	0	0	0	0	0
KP_F057-KP_R040	Bacteria	C5-C6	85.5	190777	32366	81.53	627	142	782	925	791	935	143	-	0	0	2842	0	0	194	0	0	0	0	0
KP_F057-KP_R041	Bacteria	C5-C6	85.68	191189	31954	81.53	627	142	782	924	791	934	142	-	0	0	2842	0	0	194	0	0	0	0	0
KP_F057-KP_R046	Bacteria	C5-C7	87.57	195398	27745	82.31	633	136	781	1062	791	1075	281	-	0	0	2842	0	0	194	0	0	0	0	0
KP_F057-KP_R050	Bacteria	C5-C7	89.63	200004	23139	85.44	657	112	781	1062	791	1075	281	-	0	0	2842	0	0	194	0	0	0	0	0
KP_F057-KP_R053	Bacteria	C5-C7	90.08	201001	22142	85.44	657	112	781	1076	791	1088	295	-	0	0	2842	0	0	194	0	0	0	0	0
KP_F057-KP_R054	Bacteria	C5-C7	81.5	181866	41277	82.44	634	135	781	1078	791	1090	297	-	0	0	2842	0	0	194	0	0	0	0	0
KP_F057-KP_R055	Bacteria	C5-C7	81.32	181469	41674	82.44	634	135	781	1079	791	1091	298	-	0	0	2842	0	0	194	0	0	0	0	0
KP_F057-OP_R030	Bacteria	C5-C7	90.34	201582	21561	87.91	676	93	781	1079	791	1091	297	-	0	0	2842	0	0	194	0	0	0	0	0
KP_F057-OP_R050	Bacteria	C5-C6	85.56	190922	32221	82.44	634	135	782	925	791	935	143	-	0	0	2842	0	0	194	0	0	0	0	0
KP_F057-OP_R052	Bacteria	C5-C6	85.82	191505	31638	82.44	634	135	782	925	791	935	143	-	0	0	2842	0	0	194	0	0	0	0	0
KP_F057-OP_R067	Bacteria	C5-C6	85.98	191853	31290	82.44	634	135	782	925	791	935	143	-	0	0	2842	0	0	194	0	0	0	0	0
KP_F057-OP_R073	Bacteria	C5-C6	89.93	200679	22464	87.52	673	96	781	892	791	903	111	C5-V5	0.07	2	2840	0.52	1	193	734	849	734	849	115
KP_F057-OP_R089	Bacteria	C5-C6	74.06	165269	57874	78.54	604	165	781	925	791	935	143	-	0	0	2842	0	0	194	0	0	0	0	0
KP_F057-OP_R108	Bacteria	C5-C6	69.94	156068	67075	75.03	577	192	782	925	791	935	143	-	0	0	2842	0	0	194	0	0	0	0	0
KP_F057-OP_R143	Bacteria	C5-C6	70.1	156429	66714	75.03	577	192	782	924	791	934	142	-	0	0	2842	0	0	194	0	0	0	0	0
KP_F057-OP_UI005	Bacteria	C5-C6	70.03	156262	66881	75.03	577	192	782	925	791	935	143	-	0	0	2842	0	0	194	0	0	0	0	0
KP_F057-OP_UI009	Bacteria	C5-C7	86.86	193820	29323	80.88	622	147	781	1073	791	1085	291	-	0	0	2842	0	0	194	0	0	0	0	0
KP_F058-KP_R039	Bacteria	C5-C6	69.71	155561	67582	75.68	582	187	782	925	791	935	143	-	0	0	2842	0	0	194	0	0	0	0	0
KP_F058-KP_R040	Bacteria	C5-C6	85.15	190013	33130	81.27	625	144	782	925	791	935	143	-	0	0	2842	0	0	194	0	0	0	0	0
KP_F058-KP_R041	Bacteria	C5-C6	85.34	190422	32721	81.27	625	144	782	924	791	934	142	-	0	0	2842	0	0	194	0	0	0	0	0
KP_F058-KP_R046	Bacteria	C5-C7	87.13	194424	28719	81.01	623	146	781	1062	791	1075	281	-	0	0	2842	0	0	194	0	0	0	0	0
KP_F058-KP_R050	Bacteria	C5-C7	89.19	199017	24126	84.14	647	122	781	1063	791	1075	281	-	0	0	2842	0	0	194	0	0	0	0	0
KP_F058-KP_R053	Bacteria	C5-C7	89.64	200034	23109	84.4	649	120	781	1076	791	1088	295	-	0	0	2842	0	0	194	0	0	0	0	0
KP_F058-KP_R054	Bacteria	C5-C7	81.09	180949	42194	81.4	626	143	781	1078	791	1090	297	-	0	0	2842	0	0	194	0	0	0	0	0
KP_F058-KP_R055	Bacteria	C5-C7	80.91	180556	42587	81.4	626	143	781	1079	791	1091	298	-	0	0	2842	0	0	194	0	0	0	0	0
KP_F058-OP_R030	Bacteria	C5-C7	89.9	200610	22533	86.87	668	101	781	1079	791	1091	297	-	0	0	2842	0	0	194	0	0	0	0	0
KP_F058-OP_R050	Bacteria	C5-C6	85.22	190157	32986	82.18	632	137	782	925	791	935	143	-	0	0	2842	0	0	194	0	0	0	0	0
KP_F058-OP_R052	Bacteria	C5-C6	85.48	190736	32407	82.18	632	137	782	925	791	935	143	-	0	0	2842	0	0	194	0	0	0	0	0
KP_F058-OP_R067	Bacteria	C5-C6	85.63	191083	32060	82.18	632	137	782	925	791	935	143	-	0	0	2842	0	0	194	0	0	0	0	0
KP_F058-OP_R073	Bacteria	C5-C6	89.51	199740	23403	86.48	665	104	781	892	791	903	111	-	0	0	2842	0	0	194	0	0	0	0	0
KP_F058-OP_R089	Bacteria	C5-C6	73.76	164600	58543	78.28	602	167	781	925	791	935	143	-	0	0	2842	0	0	194	0	0	0	0	0
KP_F058-OP_R108	Bacteria	C5-C6	69.65	155421	67722	74.77	575	194	782	925	791	935	143	-	0	0	2842	0	0	194	0	0	0	0	0
KP_F058-OP_R143	Bacteria	C5-C6	69.81	155780	67363	74.77	575	194	782	924	791	934	142	-	0	0	2842	0	0	194	0	0	0	0	0
KP_F058-OP_UI005	Bacteria	C5-C6	69.74	155611	67532	74.77	575	194	782	925	791	935	143	-	0	0	2842	0	0	194	0	0	0	0	0
KP_F058-OP_UI009	Bacteria	C5-C7	86.43	192856	30287	79.58	612	157	781	1073	791	1085	291	-	0	0	2842	0	0	194	0	0	0	0	0
KP_F059-KP_R039	Bacteria	C5-C6	75.77	169083	54060	84.66	651	118	783	925	792	935	142	C5-C6	0.14	4	2838	1.03	2	192	721	868	724	871	147
KP_F059-KP_R040	Bacteria	C5-C6	91.26	203645	19498	90.25	694	75	783	925	792	935	142	-	0	0	2842	0	0	194	0	0	0	0	0
KP_F059-KP_R041	Bacteria	C5-C6	91.46	204083	19060	90.25	694	75	783	924	792	934	141	-	0	0	2842	0	0	194	0	0	0	0	0
KP_F059-KP_R046	Bacteria	C5-C7	90.94	202917	20226	89.99	692	77	781	1062	792	1075	281	C5-C6	0.14	4	2838	2.06	4	190	716	994	716	994	278
KP_F059-KP_R050	Bacteria	C5-C7	93.32	208237	14906	94.67	728	41	781	1062	792	1075	281	C5-C6	26.28	747	2095	11.34	22	172	716	994	716	994	278
KP_F059-KP_R053	Bacteria	C5-C7	96.21	214685	8458	95.97	738	31	782	1076	792	1088	294	C5-V6	0.63	18	2824	3.61	7	187	1065	1356	727	1018	291
KP_F059-KP_R054	Bacteria	C5-C7	87.62	195515	27628	92.98	715	54	782	1078	792	1090	296	C5-V6	0.63	18	2824	3.61	7	187	1065	1358	727	1020	293
KP_F059-KP_R055	Bacteria	C5-C7	87.43	195091	28052	92.98	715	54	782	1079	792	1091	297	C5-V6	0.63	18	2824	3.61	7	187	1065	1359	727	1021	294
KP_F059-OP_R030	Bacteria	C5-C7	96.44	215211	7932	98.44	757	12	782	1079	792	1091	297	C5-V6	0.63	18	2824	3.61	7	187	1065	1359	727	1021	294
KP_F059-OP_R050	Bacteria	C5-C6	91.33	203795	19348	91.16	701	68	783	925	792	935	142	C5-C6	0.14	4	2838	1.03	2	192	721	868	724	871	147
KP_F059-OP_R052	Bacteria	C5-C6	91.61	204416	18727	91.16	701	68	783	925	792	935	142	C5-C6	0.14	4	2838	1.03	2	192	721	868	724	871	147
KP_F059-OP_R067	Bacteria	C5-C6	91.77	204785	18358	91.16	701	68	783	925	792	935	142	C5-C6	0.14	4	2838	1.03	2	192	721	868	724	871	147
KP_F059-OP_R089	Bacteria	C5-C6	79.84	178163	44980	87.26	671	98	782	925	792	935	142	C5-C6	0.14	4	2838	1.03	2	192	721	868	724	871	147
KP_F059-OP_R108	Bacteria	C5-C6	75.71	168937	54206	83.75	644	125	783	925	792	935	142	-	0	0	2842	0	0	194	0	0	0	0	0
KP_F059-OP_R143	Bacteria	C5-C6	75.88	169325	53818	83.75	644	125	783	924	792	934	141	-	0	0	2842	0	0	194	0	0	0	0	0
KP_F059-OP_UI005	Bacteria	C5-C6	75.8	169139	54004	83.75	644	125	783	925	792	935	142	-	0	0	2842	0	0	194	0	0	0	0	0
KP_F059-OP_UI009	Bacteria	C5-C7	90.23	201341	21802	88.82	683	86	781	1072	792	1085	291	-	0	0	2842	0	0	194	0	0	0	0	0
KP_F060-KP_R046	Bacteria	C6-C7	74.81	166944	56199	82.05	631	138	904	1062	915	1075	158	-	0	0	2842	0	0	194	0	0	0	0	0
KP_F060-KP_R050	Bacteria	C6-C7	76.8	171376	51767	84.92	653	116	904	1062	915	1075	158	-	0	0	2842	0	0	194	0	0	0	0	0
KP_F060-KP_R053	Bacteria	C6-C7	79.24	176810	46333	84.92	653	116	905	1076	915	1088	171	-	0	0	2842	0	0	194	0	0	0	0	0
KP_F060-KP_R054	Bacteria	C6-C7	79.03	176360	46783	84.79	652	117	905	1078	915	1090	173	-	0	0	2842	0	0	194	0	0	0	0	0
KP_F060-KP_R055	Bacteria	C6-C7	78.86	175968	47175	84.79	652	117	905	1079	915	1091	174	-	0	0	2842	0	0	194	0	0	0	0	0
KP_F060-KP_R056	Bacteria	C6-V7	75.01	167376	55767	73.21	563	206	905	1113	915	1125	208	-	0	0	2842	0	0	194	0	0	0	0	0
KP_F060-KP_R057	Bacteria	C6-V7	74.3	165800	57343	72.82	560	209	905	1113	915	1125	208	-	0	0	2842	0	0	194	0	0	0	0	0
KP_F060-KP_R074	Bacteria	C6-V7	80.06	178644	44499	87.39	672	97	905	1113	915	1125	208	V5-C7	0.14	4	2838	1.03	2	192	848	1050	851	1054	203
KP_F060-OP_R026	Bacteria	C6-V7	73.97	165056	58087	71.26	548	221	905	1113	915	1125	209	-	0	0	2842	0	0	194	0	0	0	0	0
KP_F060-OP_R029	Bacteria	C6-C8	77.44	172809	50334	82.05	631	138	905	1192	915	1204	288	-	0	0	2842	0	0	194	0	0	0	0	0
KP_F060-OP_R030	Bacteria	C6-C7	79.58	177568	45575	87.78	675	94	905	1079	915	1091	174	-	0	0	2842	0	0	194	0	0	0	0	0
KP_F060-OP_UI009	Bacteria	C6-C7	74.13	165422	57721	80.49	619	150	904	1072	915	1085	168	-	0	0	2842	0	0	194	0	0	0	0	0
KP_F061-KP_R046	Bacteria	C6-C7	86.94	193996	29147	87.91	676	93	906	1062	917	1075	156	-	0	0	2842	0	0	194	0	0	0	0	0
KP_F061-KP_R050	Bacteria	C6-C7	88.57	197645	25498	89.08	685	84	906	1062	917	1075	156	-	0	0	2842	0	0	194	0	0	0	0	0
KP_F061-KP_R053	Bacteria	C6-C7	91.41	203976	19167	89.08	685	84	907	1076	917	1088	169	-	0	0	2842	0	0	194	0	0	0	0	0
KP_F061-KP_R054	Bacteria	C6-C7	82.87	184916	38227	86.48	665	104	907	1078	917	1090	171	-	0	0	2842	0	0	194	0	0	0	0	0
KP_F061-KP_R055	Bacteria	C6-C7	82.69	184513	38630	86.48	665	104	907	1079	917	1091	172	-	0	0	2842	0	0	194	0	0	0	0	0
KP_F061-KP_R056	Bacteria	C6-V7	87.18	194533	28610	77.37	595	174	907	1113	917	1125	206	-	0	0	2842	0	0	194	0	0	0	0	0
KP_F061-KP_R057	Bacteria	C6-V7	84.98	189617	33526	76.2	586	183	907	1113	917	1125	207	-	0	0	2842	0	0	194	0	0	0	0	0
KP_F061-KP_R074	Bacteria	C6-V7	92.27	205896	17247	91.94	707	62	907	1113	917	1125	206	-	0	0	2842	0	0	194	0	0	0	0	0
KP_F061-OP_R026	Bacteria	C6-V7	84.63	188847	34296	74.64	574	195	907	1113	917	1125	207	-	0	0	2842	0	0	194	0	0	0	0	0
KP_F061-OP_R029	Bacteria	C6-C8	89.28	199219	23924	85.57	658	111	907	1193	917	1204	286	-	0	0	2842	0	0	194	0	0	0	0	0
KP_F061-OP_R030	Bacteria	C6-C7	91.71	204651	18492	91.94	707	62	907	1079	917	1091	172	-	0	0	2842	0	0	194	0	0	0	0	0
KP_F061-OP_UI009	Bacteria	C6-C7	86.08	192081	31062	85.31	656	113	906	1072	917	1085	166	-	0	0	2842	0	0	194	0	0	0	0	0
KP_F062-KP_R046	Bacteria	C6-C7	85.17	190051	33092	87.13	670	99	915	1063	925	1075	148	-	0	0	2842	0	0	194	0	0	0	0	0
KP_F062-KP_R050	Bacteria	C6-C7	87.13	194433	28710	89.99	692	77	915	1063	925	1075	148	-	0	0	2842	0	0	194	0	0	0	0	0
KP_F062-KP_R053	Bacteria	C6-C7	89.58	199886	23257	90.12	693	76	916	1077	925	1088	161	-	0	0	2842	0	0	194	0	0	0	0	0
KP_F062-KP_R054	Bacteria	C6-C7	81.03	180824	42319	87.52	673	96	916	1079	925	1090	163	-	0	0	2842	0	0	194	0	0	0	0	0
KP_F062-KP_R055	Bacteria	C6-C7	80.86	180432	42711	87.52	673	96	916	1080	925	1091	164	-	0	0	2842	0	0	194	0	0	0	0	0
KP_F062-KP_R056	Bacteria	C6-V7	84.93	189524	33619	76.46	588	181	916	1114	925	1125	198	-	0	0	2842	0	0	194	0	0	0	0	0
KP_F062-KP_R057	Bacteria	C6-V7	82.13	183266	39877	77.24	594	175	916	1114	925	1125	198	-	0	0	2842	0	0	194	0	0	0	0	0
KP_F062-KP_R074	Bacteria	C6-V7	90.43	201778	21365	92.59	712	57	915	1114	925	1125	198	-	0	0	2842	0	0	194	0	0	0	0	0
KP_F062-OP_R026	Bacteria	C6-V7	81.41	181660	41483	73.86	568	201	916	1114	925	1125	198	-	0	0	2842	0	0	194	0	0	0	0	0
KP_F062-OP_R029	Bacteria	C6-C8	87.43	195104	28039	85.7	659	110	916	1193	925	1204	278	-	0	0	2842	0	0	194	0	0	0	0	0
KP_F062-OP_R030	Bacteria	C6-C7	89.9	200599	22544	92.98	715	54	916	1080	925	1091	164	-	0	0	2842	0	0	194	0	0	0	0	0
KP_F062-OP_UI009	Bacteria	C6-C7	84.35	188216	34927	85.44	657	112	915	1073	925	1085	158	-	0	0	2842	0	0	194	0	0	0	0	0
KP_F063-KP_R046	Bacteria	C6-C7	84.98	189636	33507	85.18	655	114	915	1063	925	1075	148	-	0	0	2842	0	0	194	0	0	0	0	0
KP_F063-KP_R050	Bacteria	C6-C7	86.94	194012	29131	88.04	677	92	915	1063	925	1075	148	-	0	0	2842	0	0	194	0	0	0	0	0
KP_F063-KP_R053	Bacteria	C6-C7	89.38	199453	23690	88.04	677	92	916	1077	925	1088	161	-	0	0	2842	0	0	194	0	0	0	0	0
KP_F063-KP_R054	Bacteria	C6-C7	80.85	180414	42729	85.44	657	112	916	1079	925	1090	163	-	0	0	2842	0	0	194	0	0	0	0	0
KP_F063-KP_R055	Bacteria	C6-C7	80.68	180022	43121	85.44	657	112	916	1080	925	1091	164	-	0	0	2842	0	0	194	0	0	0	0	0
KP_F063-KP_R056	Bacteria	C6-V7	84.75	189105	34038	74.51	573	196	916	1114	925	1125	198	-	0	0	2842	0	0	194	0	0	0	0	0
KP_F063-KP_R057	Bacteria	C6-V7	81.94	182850	40293	75.29	579	190	916	1114	925	1125	198	-	0	0	2842	0	0	194	0	0	0	0	0
KP_F063-KP_R074	Bacteria	C6-V7	90.23	201340	21803	90.64	697	72	915	1114	925	1125	198	-	0	0	2842	0	0	194	0	0	0	0	0
KP_F063-OP_R026	Bacteria	C6-V7	81.22	181248	41895	71.91	553	216	916	1114	925	1125	198	-	0	0	2842	0	0	194	0	0	0	0	0
KP_F063-OP_R029	Bacteria	C6-C8	87.24	194676	28467	83.75	644	125	916	1193	925	1204	278	-	0	0	2842	0	0	194	0	0	0	0	0
KP_F063-OP_R030	Bacteria	C6-C7	89.7	200166	22977	90.9	699	70	916	1080	925	1091	164	-	0	0	2842	0	0	194	0	0	0	0	0
KP_F063-OP_UI009	Bacteria	C6-C7	84.16	187800	35343	83.36	641	128	915	1073	925	1085	158	-	0	0	2842	0	0	194	0	0	0	0	0
KP_F064-KP_R046	Bacteria	C6-C7	84.84	189316	33827	85.18	655	114	915	1063	925	1075	148	-	0	0	2842	0	0	194	0	0	0	0	0
KP_F064-KP_R050	Bacteria	C6-C7	86.8	193687	29456	88.04	677	92	915	1063	925	1075	148	-	0	0	2842	0	0	194	0	0	0	0	0
KP_F064-KP_R053	Bacteria	C6-C7	89.24	199123	24020	88.04	677	92	916	1077	925	1088	161	-	0	0	2842	0	0	194	0	0	0	0	0
KP_F064-KP_R054	Bacteria	C6-C7	80.71	180108	43035	85.44	657	112	916	1079	925	1090	163	-	0	0	2842	0	0	194	0	0	0	0	0
KP_F064-KP_R055	Bacteria	C6-C7	80.54	179716	43427	85.44	657	112	916	1080	925	1091	164	-	0	0	2842	0	0	194	0	0	0	0	0
KP_F064-KP_R056	Bacteria	C6-V7	84.61	188793	34350	74.51	573	196	916	1114	925	1125	198	-	0	0	2842	0	0	194	0	0	0	0	0
KP_F064-KP_R057	Bacteria	C6-V7	81.8	182541	40602	75.29	579	190	916	1114	925	1125	198	-	0	0	2842	0	0	194	0	0	0	0	0
KP_F064-KP_R074	Bacteria	C6-V7	90.08	201005	22138	90.64	697	72	915	1114	925	1125	198	-	0	0	2842	0	0	194	0	0	0	0	0
KP_F064-OP_R026	Bacteria	C6-V7	81.09	180943	42200	71.91	553	216	916	1114	925	1125	198	-	0	0	2842	0	0	194	0	0	0	0	0
KP_F064-OP_R029	Bacteria	C6-C8	87.1	194356	28787	83.75	644	125	916	1193	925	1204	278	-	0	0	2842	0	0	194	0	0	0	0	0
KP_F064-OP_R030	Bacteria	C6-C7	89.55	199834	23309	90.9	699	70	916	1080	925	1091	164	-	0	0	2842	0	0	194	0	0	0	0	0
KP_F064-OP_UI009	Bacteria	C6-C7	84.02	187487	35656	83.36	641	128	915	1073	925	1085	158	-	0	0	2842	0	0	194	0	0	0	0	0
KP_F076-OP_R055	Bacteria	C7-C9	80.25	179063	44080	59.69	459	310	1098	1386	1109	1397	288	-	0	0	2842	0	0	194	0	0	0	0	0
KP_F076-OP_R101	Bacteria	C7-C9	80.46	179546	43597	59.95	461	308	1098	1385	1109	1396	287	-	0	0	2842	0	0	194	0	0	0	0	0
KP_F077-KP_R002	Bacteria	C3-C4	93.66	209002	14141	92.46	711	58	343	532	348	541	188	C3-V3	52.25	1485	1357	70.62	137	57	320	471	321	472	151
KP_F077-KP_R021	Bacteria	C3-C4	93.28	208157	14986	92.46	711	58	343	532	348	541	188	C3-V3	3.24	92	2750	9.79	19	175	314	464	311	461	150
KP_F077-KP_R022	Bacteria	C3-C4	93.13	207819	15324	87.52	673	96	343	533	348	542	189	C3-V3	1.83	52	2790	4.12	8	186	317	468	327	478	151
KP_F077-KP_R023	Bacteria	C3-C4	93.19	207950	15193	87.52	673	96	343	533	348	542	189	C3-V3	1.83	52	2790	4.12	8	186	317	468	327	478	151
KP_F077-KP_R025	Bacteria	C3-C4	93.2	207978	15165	87.78	675	94	343	533	348	542	189	C3-V3	1.83	52	2790	4.12	8	186	317	468	327	478	151
KP_F077-KP_R070	Bacteria	C3-C4	93.14	207832	15311	87.52	673	96	343	535	348	544	191	C3-V3	35.19	1000	1842	37.11	72	122	320	474	315	470	154
KP_F077-KP_R071	Bacteria	C3-C4	97.17	216836	6307	95.58	735	34	343	529	335	539	186	C3-V3	44.93	1277	1565	59.79	116	78	318	468	321	470	149
KP_F077-OP_R019	Bacteria	C3-C4	86.95	194025	29118	90.25	694	75	344	532	348	541	188	C3-V3	0.07	2	2840	1.03	2	192	323	474	321	473	150
KP_F077-OP_R038	Bacteria	C3-C4	93.38	208380	14763	92.46	711	58	343	531	348	540	187	C3-V3	3.24	92	2750	9.79	19	175	314	463	311	460	149
KP_F077-OP_R040	Bacteria	C3-C4	96.91	216252	6891	95.58	735	34	343	529	335	539	186	C3-V3	3.24	92	2750	9.79	19	175	314	462	311	459	148
KP_F077-OP_R043	Bacteria	C3-C4	97.13	216748	6395	95.84	737	32	343	528	335	538	185	C3-V3	3.24	92	2750	9.79	19	175	314	461	311	458	147
KP_F077-OP_R045	Bacteria	C3-C4	93.3	208190	14953	87.52	673	96	343	533	348	542	189	C3-V3	1.83	52	2790	4.12	8	186	317	468	327	478	151
KP_F077-OP_R047	Bacteria	C3-C4	86.94	194005	29138	90.25	694	75	344	532	348	541	188	C3-V3	0.04	1	2841	0.52	1	193	325	474	325	474	149
KP_F077-OP_R051	Bacteria	C3-C4	92.76	206985	16158	87.52	673	96	343	535	348	544	191	C3-V3	1.83	52	2790	4.12	8	186	317	470	327	480	153
KP_F077-OP_R100	Bacteria	C3-C4	92.87	207234	15909	87.52	673	96	343	534	348	543	190	C3-V3	1.83	52	2790	4.12	8	186	317	469	327	479	152
KP_F077-OP_R102	Bacteria	C3-C4	93.59	208841	14302	92.46	711	58	343	535	348	544	191	C3-V3	52.22	1484	1358	70.1	136	58	320	474	321	475	154
KP_F077-OP_R115	Bacteria	C3-C4	93.12	207800	15343	87.52	673	96	343	535	348	544	191	C3-V3	1.83	52	2790	4.12	8	186	317	470	327	480	153
KP_F077-OP_R146	Bacteria	C3-C4	97.16	216813	6330	95.58	735	34	343	529	335	539	186	C3-V3	3.24	92	2750	9.79	19	175	314	462	311	459	148
KP_F078-KP_R029	Bacteria	C4-C5	89.14	198916	24227	86.87	668	101	512	804	522	814	292	-	0	0	2842	0	0	194	0	0	0	0	0
KP_F078-KP_R030	Bacteria	C4-C5	90.45	201827	21316	88.17	678	91	512	796	522	806	284	-	0	0	2842	0	0	194	0	0	0	0	0
KP_F078-KP_R031	Bacteria	C4-C5	93.19	207952	15191	95.97	738	31	513	801	522	810	288	V3-C5	51.48	1463	1379	63.92	124	70	450	739	453	742	289
KP_F078-KP_R032	Bacteria	C4-C5	93.16	207879	15264	95.58	735	34	513	801	522	810	288	V3-C5	51.51	1464	1378	63.92	124	70	450	739	453	742	289
KP_F078-KP_R033	Bacteria	C4-C5	90.16	201177	21966	87.52	673	96	512	801	522	811	289	V3-C5	0.21	6	2836	0.52	1	193	453	743	453	743	290
KP_F078-KP_R034	Bacteria	C4-C5	92.93	207366	15777	94.15	724	45	513	802	522	811	289	V3-C5	1.16	33	2809	3.61	7	187	438	728	441	731	290
KP_F078-KP_R035	Bacteria	C4-C5	92.89	207289	15854	95.45	734	35	513	804	522	813	291	V3-C5	51.44	1462	1380	63.92	124	70	450	742	453	745	292
KP_F078-KP_R036	Bacteria	C4-C5	90.03	200888	22255	87.52	673	96	512	803	522	813	291	V3-C5	0.21	6	2836	0.52	1	193	453	745	453	745	292
KP_F078-KP_R037	Bacteria	C4-C5	89.71	200182	22961	87.39	672	97	512	804	522	814	292	V3-C5	0.21	6	2836	0.52	1	193	453	746	453	746	293
KP_F078-KP_R038	Bacteria	C4-C5	92.67	206780	16363	95.32	733	36	513	805	522	814	292	V3-C5	51.34	1459	1383	62.89	122	72	450	743	453	746	293
KP_F078-OP_R010	Bacteria	C4-C5	92.67	206785	16358	95.32	733	36	513	805	522	814	292	V3-C5	51.34	1459	1383	62.89	122	72	450	743	453	746	293
KP_F078-OP_R014	Bacteria	C4-C5	92.67	206789	16354	95.32	733	36	513	805	522	814	292	V3-C5	51.37	1460	1382	62.89	122	72	450	743	453	746	293
KP_F078-OP_R020	Bacteria	C4-C5	92.99	207496	15647	95.45	734	35	513	804	522	813	291	V3-C5	51.44	1462	1380	63.92	124	70	450	742	453	745	292
KP_F078-OP_R032	Bacteria	C4-C5	93.14	207838	15305	95.19	732	37	513	801	522	810	288	V3-C5	51.48	1463	1379	63.92	124	70	450	739	453	742	289
KP_F078-OP_R036	Bacteria	C4-C5	92.71	206870	16273	95.32	733	36	513	805	522	814	292	V3-C5	51.37	1460	1382	62.89	122	72	450	743	453	746	293
KP_F078-OP_R048	Bacteria	C4-C5	92.58	206586	16557	95.32	733	36	513	805	522	814	292	V3-C5	51.37	1460	1382	62.89	122	72	450	743	453	746	293
KP_F078-OP_R066	Bacteria	C4-C5	89.83	200453	22690	88.43	680	89	512	804	522	814	292	V3-C5	0.21	6	2836	0.52	1	193	453	746	453	746	293
KP_F078-OP_R070	Bacteria	C4-C5	92.93	207366	15777	95.84	737	32	513	804	522	813	291	V3-C5	51.44	1462	1380	63.92	124	70	450	742	453	745	292
KP_F078-OP_R079	Bacteria	C4-C5	89.98	200775	22368	87.91	676	93	512	803	522	813	291	V3-C5	0.21	6	2836	0.52	1	193	453	745	453	745	292
KP_F078-OP_R086	Bacteria	C4-C5	89.71	200178	22965	87.13	670	99	512	800	522	810	288	-	0	0	2842	0	0	194	0	0	0	0	0
KP_F078-OP_R088	Bacteria	C4-C5	89.62	199992	23151	87.39	672	97	512	804	522	814	292	V3-C5	0.21	6	2836	0.52	1	193	453	746	453	746	293
KP_F078-OP_R119	Bacteria	C4-C5	92.67	206778	16365	94.41	726	43	513	805	522	814	292	V3-C5	1.09	31	2811	2.58	5	189	447	740	441	734	293
KP_F078-OP_R139	Bacteria	C4-C5	89.27	199206	23937	86.87	668	101	512	804	522	814	292	-	0	0	2842	0	0	194	0	0	0	0	0
KP_F079-KP_R029	Bacteria	C4-C5	88.97	198533	24610	81.66	628	141	516	804	526	814	288	-	0	0	2842	0	0	194	0	0	0	0	0
KP_F079-KP_R030	Bacteria	C4-C5	90.27	201442	21701	82.83	637	132	516	796	526	806	280	V3-C5	0.07	2	2840	0.52	1	193	469	749	469	749	280
KP_F079-KP_R031	Bacteria	C4-C5	93.02	207577	15566	90.64	697	72	517	801	526	810	284	V3-C5	42.12	1197	1645	59.28	115	79	467	753	452	737	286
KP_F079-KP_R032	Bacteria	C4-C5	92.99	207504	15639	90.25	694	75	517	801	526	810	284	V3-C5	42.19	1199	1643	59.79	116	78	467	753	452	737	285
KP_F079-KP_R033	Bacteria	C4-C5	89.99	200798	22345	82.18	632	137	516	801	526	811	285	V3-C5	0.21	6	2836	0.52	1	193	457	743	457	743	286
KP_F079-KP_R034	Bacteria	C4-C5	92.76	206996	16147	88.82	683	86	517	802	526	811	285	V3-C5	1.86	53	2789	5.67	11	183	552	838	445	731	285
KP_F079-KP_R035	Bacteria	C4-C5	92.73	206916	16227	90.12	693	76	517	804	526	813	287	V3-C5	42.08	1196	1646	59.28	115	79	467	756	452	740	289
KP_F079-KP_R036	Bacteria	C4-C5	89.86	200508	22635	82.18	632	137	516	803	526	813	287	V3-C5	0.21	6	2836	0.52	1	193	457	745	457	745	288
KP_F079-KP_R037	Bacteria	C4-C5	89.54	199801	23342	82.18	632	137	516	804	526	814	288	V3-C5	0.21	6	2836	0.52	1	193	457	746	457	746	289
KP_F079-KP_R038	Bacteria	C4-C5	92.5	206406	16737	90.12	693	76	517	805	526	814	288	V3-C5	42.01	1194	1648	58.25	113	81	468	757	452	741	290
KP_F079-OP_R010	Bacteria	C4-C5	92.5	206411	16732	90.12	693	76	517	805	526	814	288	V3-C5	42.01	1194	1648	58.25	113	81	468	757	452	741	290
KP_F079-OP_R014	Bacteria	C4-C5	92.5	206415	16728	90.12	693	76	517	805	526	814	288	V3-C5	42.08	1196	1646	58.76	114	80	468	757	452	741	290
KP_F079-OP_R020	Bacteria	C4-C5	92.82	207123	16020	90.12	693	76	517	804	526	813	287	V3-C5	42.08	1196	1646	59.28	115	79	467	756	452	740	289
KP_F079-OP_R032	Bacteria	C4-C5	92.97	207463	15680	89.86	691	78	517	801	526	810	284	V3-C5	37.9	1077	1765	50	97	97	463	747	452	737	285
KP_F079-OP_R036	Bacteria	C4-C5	92.54	206496	16647	90.12	693	76	517	805	526	814	288	V3-C5	42.08	1196	1646	58.76	114	80	468	757	452	741	290
KP_F079-OP_R048	Bacteria	C4-C5	92.41	206212	16931	90.12	693	76	517	805	526	814	288	V3-C5	42.08	1196	1646	58.76	114	80	468	757	452	741	290
KP_F079-OP_R066	Bacteria	C4-C5	89.66	200070	23073	83.22	640	129	516	804	526	814	288	V3-C5	0.28	8	2834	1.03	2	192	460	748	457	746	288
KP_F079-OP_R070	Bacteria	C4-C5	92.76	206993	16150	90.51	696	73	517	804	526	813	287	V3-C5	42.08	1196	1646	59.28	115	79	467	756	452	740	289
KP_F079-OP_R079	Bacteria	C4-C5	89.81	200395	22748	82.57	635	134	516	803	526	813	287	V3-C5	0.21	6	2836	0.52	1	193	457	745	457	745	288
KP_F079-OP_R086	Bacteria	C4-C5	89.54	199794	23349	81.79	629	140	516	800	526	810	284	-	0	0	2842	0	0	194	0	0	0	0	0
KP_F079-OP_R088	Bacteria	C4-C5	89.45	199611	23532	82.18	632	137	516	804	526	814	288	V3-C5	0.21	6	2836	0.52	1	193	457	746	457	746	289
KP_F079-OP_R119	Bacteria	C4-C5	92.5	206405	16738	89.21	686	83	517	805	526	814	288	V3-C5	1.79	51	2791	4.64	9	185	562	851	445	734	289
KP_F079-OP_R139	Bacteria	C4-C5	89.1	198821	24322	81.66	628	141	516	804	526	814	288	-	0	0	2842	0	0	194	0	0	0	0	0
KP_F085-OP_R055	Bacteria	C7-C9	84.77	189169	33974	75.03	577	192	1098	1386	1110	1397	287	-	0	0	2842	0	0	194	0	0	0	0	0
KP_F085-OP_R101	Bacteria	C7-C9	85.05	189789	33354	75.29	579	190	1098	1385	1110	1396	286	-	0	0	2842	0	0	194	0	0	0	0	0
OP_F009-KP_R039	Bacteria	C5-C6	72.49	161757	61386	83.09	639	130	784	926	792	935	142	C5-C6	0.14	4	2838	1.03	2	192	721	868	724	871	147
OP_F009-KP_R040	Bacteria	C5-C6	87.94	196240	26903	88.69	682	87	783	925	792	935	142	-	0	0	2842	0	0	194	0	0	0	0	0
OP_F009-KP_R041	Bacteria	C5-C6	88.13	196667	26476	88.69	682	87	783	924	792	934	141	-	0	0	2842	0	0	194	0	0	0	0	0
OP_F009-KP_R046	Bacteria	C5-C7	87.66	195609	27534	88.17	678	91	782	1062	792	1075	280	C5-C6	0.14	4	2838	2.06	4	190	716	994	716	994	278
OP_F009-KP_R050	Bacteria	C5-C7	90.04	200912	22231	92.85	714	55	782	1062	792	1075	280	C5-C6	26.28	747	2095	11.34	22	172	716	994	716	994	278
OP_F009-KP_R053	Bacteria	C5-C7	92.85	207197	15946	94.41	726	43	783	1076	792	1088	294	-	0	0	2842	0	0	194	0	0	0	0	0
OP_F009-KP_R054	Bacteria	C5-C7	84.29	188078	35065	91.42	703	66	783	1078	792	1090	296	-	0	0	2842	0	0	194	0	0	0	0	0
OP_F009-KP_R055	Bacteria	C5-C7	84.1	187669	35474	91.42	703	66	783	1079	792	1091	297	-	0	0	2842	0	0	194	0	0	0	0	0
OP_F009-OP_R030	Bacteria	C5-C7	93.1	207745	15398	96.88	745	24	783	1079	792	1091	297	-	0	0	2842	0	0	194	0	0	0	0	0
OP_F009-OP_R050	Bacteria	C5-C6	88.01	196385	26758	89.6	689	80	783	925	792	935	142	C5-C6	0.14	4	2838	1.03	2	192	721	868	724	871	147
OP_F009-OP_R052	Bacteria	C5-C6	88.28	196989	26154	89.6	689	80	783	925	792	935	142	C5-C6	0.14	4	2838	1.03	2	192	721	868	724	871	147
OP_F009-OP_R067	Bacteria	C5-C6	88.44	197344	25799	89.6	689	80	783	925	792	935	142	C5-C6	0.14	4	2838	1.03	2	192	721	868	724	871	147
OP_F009-OP_R089	Bacteria	C5-C6	76.55	170807	52336	85.7	659	110	783	925	792	935	142	C5-C6	0.14	4	2838	1.03	2	192	721	868	724	871	147
OP_F009-OP_R108	Bacteria	C5-C6	72.43	161616	61527	82.18	632	137	784	926	792	935	142	-	0	0	2842	0	0	194	0	0	0	0	0
OP_F009-OP_R143	Bacteria	C5-C6	72.6	161993	61150	82.18	632	137	784	925	792	934	141	-	0	0	2842	0	0	194	0	0	0	0	0
OP_F009-OP_UI005	Bacteria	C5-C6	72.51	161808	61335	82.18	632	137	784	926	792	935	142	-	0	0	2842	0	0	194	0	0	0	0	0
OP_F009-OP_UI009	Bacteria	C5-C7	86.96	194040	29103	86.87	668	101	782	1073	792	1085	290	-	0	0	2842	0	0	194	0	0	0	0	0
OP_F014-KP_R029	Bacteria	C4-C5	89.19	199022	24121	86.87	668	101	512	804	522	814	292	-	0	0	2842	0	0	194	0	0	0	0	0
OP_F014-KP_R030	Bacteria	C4-C5	90.5	201935	21208	88.17	678	91	512	796	522	806	284	V3-C5	0.07	2	2840	0.52	1	193	465	749	465	749	284
OP_F014-KP_R033	Bacteria	C4-C5	90.2	201285	21858	87.52	673	96	512	801	522	811	289	V3-C5	0.21	6	2836	0.52	1	193	453	743	453	743	290
OP_F014-KP_R034	Bacteria	C4-C5	92.98	207479	15664	94.15	724	45	513	802	522	811	289	V3-C5	1.86	53	2789	5.67	11	183	548	838	441	731	289
OP_F014-KP_R036	Bacteria	C4-C5	90.07	200996	22147	87.52	673	96	512	803	522	813	291	V3-C5	0.21	6	2836	0.52	1	193	453	745	453	745	292
OP_F014-KP_R037	Bacteria	C4-C5	89.76	200289	22854	87.39	672	97	512	804	522	814	292	V3-C5	0.21	6	2836	0.52	1	193	453	746	453	746	293
OP_F014-OP_R066	Bacteria	C4-C5	89.88	200560	22583	88.43	680	89	512	804	522	814	292	V3-C5	0.28	8	2834	1.03	2	192	456	748	453	746	292
OP_F014-OP_R079	Bacteria	C4-C5	90.02	200883	22260	87.91	676	93	512	803	522	813	291	V3-C5	0.21	6	2836	0.52	1	193	453	745	453	745	292
OP_F014-OP_R086	Bacteria	C4-C5	89.76	200285	22858	87.13	670	99	512	800	522	810	288	-	0	0	2842	0	0	194	0	0	0	0	0
OP_F014-OP_R088	Bacteria	C4-C5	89.67	200099	23044	87.39	672	97	512	804	522	814	292	V3-C5	0.21	6	2836	0.52	1	193	453	746	453	746	293
OP_F014-OP_R119	Bacteria	C4-C5	92.72	206890	16253	94.41	726	43	513	805	522	814	292	V3-C5	1.79	51	2791	4.64	9	185	558	851	441	734	293
OP_F014-OP_R139	Bacteria	C4-C5	89.32	199312	23831	86.87	668	101	512	804	522	814	292	-	0	0	2842	0	0	194	0	0	0	0	0
OP_F021-KP_R029	Bacteria	C4-C5	89.47	199652	23491	87	669	100	512	804	522	814	292	-	0	0	2842	0	0	194	0	0	0	0	0
OP_F021-KP_R030	Bacteria	C4-C5	90.78	202576	20567	88.3	679	90	512	796	522	806	284	-	0	0	2842	0	0	194	0	0	0	0	0
OP_F021-KP_R031	Bacteria	C4-C5	96.92	216266	6877	98.96	761	8	512	800	522	810	288	V3-C5	51.72	1470	1372	63.92	124	70	450	739	453	742	289
OP_F021-KP_R032	Bacteria	C4-C5	93.83	209377	13766	97.53	750	19	513	801	522	810	288	V3-C5	51.76	1471	1371	63.92	124	70	450	739	453	742	289
OP_F021-KP_R033	Bacteria	C4-C5	90.49	201923	21220	87.65	674	95	512	801	522	811	289	V3-C5	0.21	6	2836	0.52	1	193	453	743	453	743	290
OP_F021-KP_R034	Bacteria	C4-C5	93.3	208200	14943	94.67	728	41	513	802	522	811	289	V3-C5	1.16	33	2809	3.61	7	187	438	728	441	731	290
OP_F021-KP_R035	Bacteria	C4-C5	93.56	208784	14359	97.4	749	20	513	804	522	813	291	V3-C5	51.69	1469	1373	63.92	124	70	450	742	453	745	292
OP_F021-KP_R036	Bacteria	C4-C5	90.36	201634	21509	87.65	674	95	512	803	522	813	291	V3-C5	0.21	6	2836	0.52	1	193	453	745	453	745	292
OP_F021-KP_R037	Bacteria	C4-C5	90.04	200924	22219	87.52	673	96	512	804	522	814	292	V3-C5	0.21	6	2836	0.52	1	193	453	746	453	746	293
OP_F021-KP_R038	Bacteria	C4-C5	93.31	208222	14921	97.14	747	22	513	805	522	814	292	V3-C5	51.58	1466	1376	62.89	122	72	450	743	453	746	293
OP_F021-OP_R010	Bacteria	C4-C5	93.32	208227	14916	97.14	747	22	513	805	522	814	292	V3-C5	51.58	1466	1376	62.89	122	72	450	743	453	746	293
OP_F021-OP_R014	Bacteria	C4-C5	93.32	208231	14912	97.14	747	22	513	805	522	814	292	V3-C5	51.62	1467	1375	62.89	122	72	450	743	453	746	293
OP_F021-OP_R020	Bacteria	C4-C5	93.66	208992	14151	97.4	749	20	513	804	522	813	291	V3-C5	51.69	1469	1373	63.92	124	70	450	742	453	745	292
OP_F021-OP_R032	Bacteria	C4-C5	93.81	209336	13807	97.14	747	22	513	801	522	810	288	V3-C5	51.72	1470	1372	63.92	124	70	450	739	453	742	289
OP_F021-OP_R036	Bacteria	C4-C5	93.41	208429	14714	97.27	748	21	513	805	522	814	292	V3-C5	51.62	1467	1375	62.89	122	72	450	743	453	746	293
OP_F021-OP_R048	Bacteria	C4-C5	93.23	208027	15116	97.14	747	22	513	805	522	814	292	V3-C5	51.62	1467	1375	62.89	122	72	450	743	453	746	293
OP_F021-OP_R066	Bacteria	C4-C5	90.16	201197	21946	88.56	681	88	512	804	522	814	292	V3-C5	0.21	6	2836	0.52	1	193	453	746	453	746	293
OP_F021-OP_R070	Bacteria	C4-C5	96.65	215660	7483	98.83	760	9	512	803	522	813	291	V3-C5	51.69	1469	1373	63.92	124	70	450	742	453	745	292
OP_F021-OP_R079	Bacteria	C4-C5	93.35	208299	14844	89.08	685	84	511	802	522	813	291	V3-C5	0.21	6	2836	0.52	1	193	453	745	453	745	292
OP_F021-OP_R086	Bacteria	C4-C5	90.04	200920	22223	87.26	671	98	512	800	522	810	288	-	0	0	2842	0	0	194	0	0	0	0	0
OP_F021-OP_R088	Bacteria	C4-C5	89.96	200733	22410	87.52	673	96	512	804	522	814	292	V3-C5	0.21	6	2836	0.52	1	193	453	746	453	746	293
OP_F021-OP_R119	Bacteria	C4-C5	96.06	214361	8782	95.84	737	32	512	804	522	814	292	V3-C5	1.09	31	2811	2.58	5	189	447	740	441	734	293
OP_F021-OP_R139	Bacteria	C4-C5	89.6	199943	23200	87	669	100	512	804	522	814	292	-	0	0	2842	0	0	194	0	0	0	0	0
OP_F028-OP_R055	Bacteria	C7-C9	77.81	173619	49524	57.22	440	329	1098	1386	1109	1397	288	-	0	0	2842	0	0	194	0	0	0	0	0
OP_F028-OP_R101	Bacteria	C7-C9	78.02	174096	49047	57.48	442	327	1098	1385	1109	1396	287	-	0	0	2842	0	0	194	0	0	0	0	0
OP_F030-KP_R029	Bacteria	C4-C5	89.13	198894	24249	86.87	668	101	512	804	522	814	292	-	0	0	2842	0	0	194	0	0	0	0	0
OP_F030-KP_R030	Bacteria	C4-C5	90.44	201805	21338	88.17	678	91	512	796	522	806	284	-	0	0	2842	0	0	194	0	0	0	0	0
OP_F030-KP_R031	Bacteria	C4-C5	93.18	207930	15213	95.97	738	31	513	801	522	810	288	V3-C5	3.24	92	2750	9.79	19	175	445	733	442	730	288
OP_F030-KP_R032	Bacteria	C4-C5	93.15	207857	15286	95.58	735	34	513	801	522	810	288	V3-C5	3.24	92	2750	9.79	19	175	445	733	442	730	288
OP_F030-KP_R033	Bacteria	C4-C5	90.15	201155	21988	87.52	673	96	512	801	522	811	289	-	0	0	2842	0	0	194	0	0	0	0	0
OP_F030-KP_R034	Bacteria	C4-C5	92.92	207344	15799	94.15	724	45	513	802	522	811	289	-	0	0	2842	0	0	194	0	0	0	0	0
OP_F030-KP_R035	Bacteria	C4-C5	92.88	207267	15876	95.45	734	35	513	804	522	813	291	V3-C5	3.24	92	2750	9.79	19	175	445	736	442	733	291
OP_F030-KP_R036	Bacteria	C4-C5	90.02	200866	22277	87.52	673	96	512	803	522	813	291	-	0	0	2842	0	0	194	0	0	0	0	0
OP_F030-KP_R037	Bacteria	C4-C5	89.7	200160	22983	87.39	672	97	512	804	522	814	292	-	0	0	2842	0	0	194	0	0	0	0	0
OP_F030-KP_R038	Bacteria	C4-C5	92.66	206758	16385	95.32	733	36	513	805	522	814	292	V3-C5	3.24	92	2750	9.79	19	175	445	737	442	734	292
OP_F030-OP_R010	Bacteria	C4-C5	92.66	206763	16380	95.32	733	36	513	805	522	814	292	V3-C5	3.24	92	2750	9.79	19	175	445	737	442	734	292
OP_F030-OP_R014	Bacteria	C4-C5	92.66	206767	16376	95.32	733	36	513	805	522	814	292	V3-C5	3.24	92	2750	9.79	19	175	445	737	442	734	292
OP_F030-OP_R020	Bacteria	C4-C5	92.98	207474	15669	95.45	734	35	513	804	522	813	291	V3-C5	3.24	92	2750	9.79	19	175	445	736	442	733	291
OP_F030-OP_R032	Bacteria	C4-C5	93.13	207816	15327	95.19	732	37	513	801	522	810	288	V3-C5	3.24	92	2750	9.79	19	175	445	733	442	730	288
OP_F030-OP_R036	Bacteria	C4-C5	92.7	206848	16295	95.32	733	36	513	805	522	814	292	V3-C5	3.24	92	2750	9.79	19	175	445	737	442	734	292
OP_F030-OP_R048	Bacteria	C4-C5	92.57	206564	16579	95.32	733	36	513	805	522	814	292	V3-C5	3.24	92	2750	9.79	19	175	445	737	442	734	292
OP_F030-OP_R066	Bacteria	C4-C5	89.82	200431	22712	88.43	680	89	512	804	522	814	292	-	0	0	2842	0	0	194	0	0	0	0	0
OP_F030-OP_R070	Bacteria	C4-C5	92.92	207344	15799	95.84	737	32	513	804	522	813	291	V3-C5	3.24	92	2750	9.79	19	175	445	736	442	733	291
OP_F030-OP_R079	Bacteria	C4-C5	89.97	200753	22390	87.91	676	93	512	803	522	813	291	-	0	0	2842	0	0	194	0	0	0	0	0
OP_F030-OP_R086	Bacteria	C4-C5	89.7	200156	22987	87.13	670	99	512	800	522	810	288	-	0	0	2842	0	0	194	0	0	0	0	0
OP_F030-OP_R088	Bacteria	C4-C5	89.61	199970	23173	87.39	672	97	512	804	522	814	292	-	0	0	2842	0	0	194	0	0	0	0	0
OP_F030-OP_R119	Bacteria	C4-C5	92.66	206756	16387	94.41	726	43	513	805	522	814	292	-	0	0	2842	0	0	194	0	0	0	0	0
OP_F030-OP_R139	Bacteria	C4-C5	89.26	199184	23959	86.87	668	101	512	804	522	814	292	-	0	0	2842	0	0	194	0	0	0	0	0
OP_F033-KP_R029	Bacteria	C4-C5	83.82	187029	36114	70.87	545	224	558	804	568	814	246	-	0	0	2842	0	0	194	0	0	0	0	0
OP_F033-KP_R030	Bacteria	C4-C5	84.85	189330	33813	72.3	556	213	558	796	568	806	238	-	0	0	2842	0	0	194	0	0	0	0	0
OP_F033-KP_R031	Bacteria	C4-C5	90.96	202965	20178	82.96	638	131	558	800	568	810	242	-	0	0	2842	0	0	194	0	0	0	0	0
OP_F033-KP_R032	Bacteria	C4-C5	87.88	196089	27054	81.53	627	142	559	801	568	810	242	-	0	0	2842	0	0	194	0	0	0	0	0
OP_F033-KP_R033	Bacteria	C4-C5	84.54	188641	34502	71.52	550	219	558	801	568	811	243	-	0	0	2842	0	0	194	0	0	0	0	0
OP_F033-KP_R034	Bacteria	C4-C5	87.33	194878	28265	78.54	604	165	559	802	568	811	243	-	0	0	2842	0	0	194	0	0	0	0	0
OP_F033-KP_R035	Bacteria	C4-C5	87.63	195541	27602	81.53	627	142	559	804	568	813	245	-	0	0	2842	0	0	194	0	0	0	0	0
OP_F033-KP_R036	Bacteria	C4-C5	84.42	188387	34756	71.52	550	219	558	803	568	813	245	-	0	0	2842	0	0	194	0	0	0	0	0
OP_F033-KP_R037	Bacteria	C4-C5	84.36	188237	34906	71.39	549	220	558	804	568	814	246	-	0	0	2842	0	0	194	0	0	0	0	0
OP_F033-KP_R038	Bacteria	C4-C5	87.63	195535	27608	81.27	625	144	559	805	568	814	246	-	0	0	2842	0	0	194	0	0	0	0	0
OP_F033-OP_R010	Bacteria	C4-C5	87.63	195540	27603	81.27	625	144	559	805	568	814	246	-	0	0	2842	0	0	194	0	0	0	0	0
OP_F033-OP_R014	Bacteria	C4-C5	87.63	195544	27599	81.27	625	144	559	805	568	814	246	-	0	0	2842	0	0	194	0	0	0	0	0
OP_F033-OP_R020	Bacteria	C4-C5	87.72	195745	27398	81.53	627	142	559	804	568	813	245	-	0	0	2842	0	0	194	0	0	0	0	0
OP_F033-OP_R032	Bacteria	C4-C5	87.86	196049	27094	81.14	624	145	559	801	568	810	242	-	0	0	2842	0	0	194	0	0	0	0	0
OP_F033-OP_R036	Bacteria	C4-C5	87.71	195727	27416	81.4	626	143	559	805	568	814	246	-	0	0	2842	0	0	194	0	0	0	0	0
OP_F033-OP_R048	Bacteria	C4-C5	87.54	195344	27799	81.27	625	144	559	805	568	814	246	-	0	0	2842	0	0	194	0	0	0	0	0
OP_F033-OP_R066	Bacteria	C4-C5	84.5	188562	34581	72.69	559	210	558	804	568	814	246	-	0	0	2842	0	0	194	0	0	0	0	0
OP_F033-OP_R070	Bacteria	C4-C5	90.71	202404	20739	82.96	638	131	558	803	568	813	245	-	0	0	2842	0	0	194	0	0	0	0	0
OP_F033-OP_R079	Bacteria	C4-C5	87.41	195043	28100	72.95	561	208	557	802	568	813	245	-	0	0	2842	0	0	194	0	0	0	0	0
OP_F033-OP_R086	Bacteria	C4-C5	84.11	187695	35448	71	546	223	558	800	568	810	242	-	0	0	2842	0	0	194	0	0	0	0	0
OP_F033-OP_R088	Bacteria	C4-C5	84.27	188050	35093	71.39	549	220	558	804	568	814	246	-	0	0	2842	0	0	194	0	0	0	0	0
OP_F033-OP_R119	Bacteria	C4-C5	90.35	201606	21537	79.71	613	156	558	804	568	814	246	-	0	0	2842	0	0	194	0	0	0	0	0
OP_F033-OP_R139	Bacteria	C4-C5	83.94	187312	35831	70.87	545	224	558	804	568	814	246	-	0	0	2842	0	0	194	0	0	0	0	0
OP_F043-KP_R021	Bacteria	C3-C4	93.32	208246	14897	92.46	711	58	343	532	348	541	188	C3-V3	3.24	92	2750	9.79	19	175	314	464	311	461	150
OP_F043-KP_R022	Bacteria	C3-C4	93.17	207908	15235	87.52	673	96	343	533	348	542	189	C3-V3	1.83	52	2790	4.12	8	186	317	468	327	478	151
OP_F043-KP_R023	Bacteria	C3-C4	93.23	208039	15104	87.52	673	96	343	533	348	542	189	C3-V3	1.83	52	2790	4.12	8	186	317	468	327	478	151
OP_F043-KP_R025	Bacteria	C3-C4	93.24	208067	15076	87.78	675	94	343	533	348	542	189	C3-V3	1.83	52	2790	4.12	8	186	317	468	327	478	151
OP_F043-KP_R070	Bacteria	C3-C4	93.18	207921	15222	87.52	673	96	343	535	348	544	191	C3-V3	36.21	1029	1813	42.27	82	112	321	478	315	470	157
OP_F043-KP_R071	Bacteria	C3-C4	97.22	216932	6211	95.58	735	34	343	529	335	539	186	C3-V3	52.08	1480	1362	63.92	124	70	318	467	315	470	149
OP_F043-OP_R019	Bacteria	C3-C4	86.99	194105	29038	90.25	694	75	344	532	348	541	188	C3-V3	0.07	2	2840	1.03	2	192	323	474	321	473	150
OP_F043-OP_R038	Bacteria	C3-C4	93.42	208469	14674	92.46	711	58	343	531	348	540	187	C3-V3	3.24	92	2750	9.79	19	175	314	463	311	460	149
OP_F043-OP_R040	Bacteria	C3-C4	96.95	216348	6795	95.58	735	34	343	529	335	539	186	C3-V3	3.24	92	2750	9.79	19	175	314	462	311	459	148
OP_F043-OP_R043	Bacteria	C3-C4	97.18	216844	6299	95.84	737	32	343	528	335	538	185	C3-V3	3.24	92	2750	9.79	19	175	314	461	311	458	147
OP_F043-OP_R045	Bacteria	C3-C4	93.34	208280	14863	87.52	673	96	343	533	348	542	189	C3-V3	1.83	52	2790	4.12	8	186	317	468	327	478	151
OP_F043-OP_R047	Bacteria	C3-C4	86.98	194085	29058	90.25	694	75	344	532	348	541	188	C3-V3	0.04	1	2841	0.52	1	193	325	474	325	474	149
OP_F043-OP_R051	Bacteria	C3-C4	92.8	207074	16069	87.52	673	96	343	535	348	544	191	C3-V3	1.83	52	2790	4.12	8	186	317	470	327	480	153
OP_F043-OP_R100	Bacteria	C3-C4	92.91	207323	15820	87.52	673	96	343	534	348	543	190	C3-V3	1.83	52	2790	4.12	8	186	317	469	327	479	152
OP_F043-OP_R115	Bacteria	C3-C4	93.16	207889	15254	87.52	673	96	343	535	348	544	191	C3-V3	1.83	52	2790	4.12	8	186	317	470	327	480	153
OP_F043-OP_R146	Bacteria	C3-C4	97.21	216909	6234	95.58	735	34	343	529	335	539	186	C3-V3	3.24	92	2750	9.79	19	175	314	462	311	459	148
OP_F046-KP_R002	Bacteria	C3-C4	92.58	206582	16561	84.01	646	123	343	532	348	541	188	C3-V3	0.39	11	2831	3.09	6	188	343	817	338	488	475
OP_F046-KP_R021	Bacteria	C3-C4	92.21	205752	17391	84.01	646	123	343	532	348	541	188	-	0	0	2842	0	0	194	0	0	0	0	0
OP_F046-KP_R022	Bacteria	C3-C4	92.37	206121	17022	83.49	642	127	343	533	348	542	189	-	0	0	2842	0	0	194	0	0	0	0	0
OP_F046-KP_R023	Bacteria	C3-C4	92.43	206252	16891	83.49	642	127	343	533	348	542	189	-	0	0	2842	0	0	194	0	0	0	0	0
OP_F046-KP_R025	Bacteria	C3-C4	92.44	206280	16863	83.75	644	125	343	533	348	542	189	-	0	0	2842	0	0	194	0	0	0	0	0
OP_F046-KP_R070	Bacteria	C3-C4	92.38	206136	17007	83.49	642	127	343	535	348	544	191	C3-V3	0.39	11	2831	3.09	6	188	343	820	338	491	478
OP_F046-KP_R071	Bacteria	C3-C4	96.06	214357	8786	87	669	100	343	529	335	539	186	-	0	0	2842	0	0	194	0	0	0	0	0
OP_F046-OP_R019	Bacteria	C3-C4	85.92	191715	31428	81.92	630	139	344	532	348	541	188	-	0	0	2842	0	0	194	0	0	0	0	0
OP_F046-OP_R038	Bacteria	C3-C4	92.31	205974	17169	84.01	646	123	343	531	348	540	187	-	0	0	2842	0	0	194	0	0	0	0	0
OP_F046-OP_R040	Bacteria	C3-C4	95.8	213783	9360	87	669	100	343	529	335	539	186	-	0	0	2842	0	0	194	0	0	0	0	0
OP_F046-OP_R043	Bacteria	C3-C4	96.02	214271	8872	87.26	671	98	343	528	335	538	185	-	0	0	2842	0	0	194	0	0	0	0	0
OP_F046-OP_R045	Bacteria	C3-C4	92.54	206487	16656	83.49	642	127	343	533	348	542	189	-	0	0	2842	0	0	194	0	0	0	0	0
OP_F046-OP_R047	Bacteria	C3-C4	85.91	191695	31448	81.92	630	139	344	532	348	541	188	-	0	0	2842	0	0	194	0	0	0	0	0
OP_F046-OP_R051	Bacteria	C3-C4	92	205298	17845	83.49	642	127	343	535	348	544	191	-	0	0	2842	0	0	194	0	0	0	0	0
OP_F046-OP_R100	Bacteria	C3-C4	92.11	205540	17603	83.49	642	127	343	534	348	543	190	-	0	0	2842	0	0	194	0	0	0	0	0
OP_F046-OP_R102	Bacteria	C3-C4	92.51	206426	16717	84.01	646	123	343	535	348	544	191	C3-V3	0.39	11	2831	3.09	6	188	343	820	338	491	478
OP_F046-OP_R115	Bacteria	C3-C4	92.36	206104	17039	83.49	642	127	343	535	348	544	191	-	0	0	2842	0	0	194	0	0	0	0	0
OP_F046-OP_R146	Bacteria	C3-C4	96.05	214334	8809	87	669	100	343	529	335	539	186	-	0	0	2842	0	0	194	0	0	0	0	0
OP_F048-KP_R002	Bacteria	C3-C4	93.17	207909	15234	92.46	711	58	340	532	345	541	191	-	0	0	2842	0	0	194	0	0	0	0	0
OP_F048-KP_R021	Bacteria	C3-C4	92.8	207070	16073	92.46	711	58	340	532	345	541	191	-	0	0	2842	0	0	194	0	0	0	0	0
OP_F048-KP_R022	Bacteria	C3-C4	92.65	206732	16411	87.52	673	96	340	533	345	542	192	-	0	0	2842	0	0	194	0	0	0	0	0
OP_F048-KP_R023	Bacteria	C3-C4	92.7	206863	16280	87.52	673	96	340	533	345	542	192	-	0	0	2842	0	0	194	0	0	0	0	0
OP_F048-KP_R025	Bacteria	C3-C4	92.72	206891	16252	87.78	675	94	340	533	345	542	192	-	0	0	2842	0	0	194	0	0	0	0	0
OP_F048-KP_R070	Bacteria	C3-C4	92.65	206744	16399	87.52	673	96	340	535	345	544	194	-	0	0	2842	0	0	194	0	0	0	0	0
OP_F048-KP_R071	Bacteria	C3-C4	96.67	215706	7437	95.58	735	34	340	529	332	539	189	-	0	0	2842	0	0	194	0	0	0	0	0
OP_F048-OP_R019	Bacteria	C3-C4	86.5	193019	30124	90.25	694	75	341	532	345	541	191	-	0	0	2842	0	0	194	0	0	0	0	0
OP_F048-OP_R038	Bacteria	C3-C4	92.9	207292	15851	92.46	711	58	340	531	345	540	190	-	0	0	2842	0	0	194	0	0	0	0	0
OP_F048-OP_R040	Bacteria	C3-C4	96.41	215126	8017	95.58	735	34	340	529	332	539	189	-	0	0	2842	0	0	194	0	0	0	0	0
OP_F048-OP_R043	Bacteria	C3-C4	96.63	215621	7522	95.84	737	32	340	528	332	538	188	-	0	0	2842	0	0	194	0	0	0	0	0
OP_F048-OP_R045	Bacteria	C3-C4	92.81	207101	16042	87.52	673	96	340	533	345	542	192	-	0	0	2842	0	0	194	0	0	0	0	0
OP_F048-OP_R047	Bacteria	C3-C4	86.49	192999	30144	90.25	694	75	341	532	345	541	191	-	0	0	2842	0	0	194	0	0	0	0	0
OP_F048-OP_R051	Bacteria	C3-C4	92.27	205903	17240	87.52	673	96	340	535	345	544	194	-	0	0	2842	0	0	194	0	0	0	0	0
OP_F048-OP_R100	Bacteria	C3-C4	92.38	206150	16993	87.52	673	96	340	534	345	543	193	-	0	0	2842	0	0	194	0	0	0	0	0
OP_F048-OP_R102	Bacteria	C3-C4	93.1	207748	15395	92.46	711	58	340	535	345	544	194	-	0	0	2842	0	0	194	0	0	0	0	0
OP_F048-OP_R115	Bacteria	C3-C4	92.64	206712	16431	87.52	673	96	340	535	345	544	194	-	0	0	2842	0	0	194	0	0	0	0	0
OP_F048-OP_R146	Bacteria	C3-C4	96.66	215683	7460	95.58	735	34	340	529	332	539	189	-	0	0	2842	0	0	194	0	0	0	0	0
OP_F050-KP_R002	Bacteria	C3-C4	93.81	209335	13808	93.89	722	47	346	532	351	541	185	-	0	0	2842	0	0	194	0	0	0	0	0
OP_F050-KP_R021	Bacteria	C3-C4	93.43	208488	14655	93.89	722	47	346	532	351	541	185	-	0	0	2842	0	0	194	0	0	0	0	0
OP_F050-KP_R022	Bacteria	C3-C4	93.26	208099	15044	88.3	679	90	346	533	351	542	186	-	0	0	2842	0	0	194	0	0	0	0	0
OP_F050-KP_R023	Bacteria	C3-C4	93.32	208231	14912	88.3	679	90	346	533	351	542	186	-	0	0	2842	0	0	194	0	0	0	0	0
OP_F050-KP_R025	Bacteria	C3-C4	93.33	208259	14884	88.56	681	88	346	533	351	542	186	-	0	0	2842	0	0	194	0	0	0	0	0
OP_F050-KP_R070	Bacteria	C3-C4	93.26	208114	15029	88.3	679	90	346	535	351	544	188	-	0	0	2842	0	0	194	0	0	0	0	0
OP_F050-KP_R071	Bacteria	C3-C4	97.32	217170	5973	97.01	746	23	346	529	338	539	183	-	0	0	2842	0	0	194	0	0	0	0	0
OP_F050-OP_R019	Bacteria	C3-C4	87.1	194355	28788	91.68	705	64	347	532	351	541	185	-	0	0	2842	0	0	194	0	0	0	0	0
OP_F050-OP_R038	Bacteria	C3-C4	93.53	208711	14432	93.89	722	47	346	531	351	540	184	-	0	0	2842	0	0	194	0	0	0	0	0
OP_F050-OP_R040	Bacteria	C3-C4	97.06	216585	6558	97.01	746	23	346	529	338	539	183	-	0	0	2842	0	0	194	0	0	0	0	0
OP_F050-OP_R043	Bacteria	C3-C4	97.28	217082	6061	97.27	748	21	346	528	338	538	182	-	0	0	2842	0	0	194	0	0	0	0	0
OP_F050-OP_R045	Bacteria	C3-C4	93.42	208471	14672	88.3	679	90	346	533	351	542	186	-	0	0	2842	0	0	194	0	0	0	0	0
OP_F050-OP_R047	Bacteria	C3-C4	87.09	194335	28808	91.68	705	64	347	532	351	541	185	-	0	0	2842	0	0	194	0	0	0	0	0
OP_F050-OP_R051	Bacteria	C3-C4	92.88	207265	15878	88.3	679	90	346	535	351	544	188	-	0	0	2842	0	0	194	0	0	0	0	0
OP_F050-OP_R100	Bacteria	C3-C4	93	207513	15630	88.3	679	90	346	534	351	543	187	-	0	0	2842	0	0	194	0	0	0	0	0
OP_F050-OP_R102	Bacteria	C3-C4	93.74	209175	13968	93.89	722	47	346	535	351	544	188	-	0	0	2842	0	0	194	0	0	0	0	0
OP_F050-OP_R115	Bacteria	C3-C4	93.25	208082	15061	88.3	679	90	346	535	351	544	188	-	0	0	2842	0	0	194	0	0	0	0	0
OP_F050-OP_R146	Bacteria	C3-C4	97.31	217147	5996	97.01	746	23	346	529	338	539	183	-	0	0	2842	0	0	194	0	0	0	0	0
OP_F059-KP_R029	Bacteria	C4-C5	82.28	183597	39546	78.54	604	165	512	804	521	814	293	-	0	0	2842	0	0	194	0	0	0	0	0
OP_F059-KP_R030	Bacteria	C4-C5	83.49	186304	36839	79.71	613	156	512	796	521	806	285	-	0	0	2842	0	0	194	0	0	0	0	0
OP_F059-KP_R031	Bacteria	C4-C5	86.23	192409	30734	87.52	673	96	512	801	521	810	289	-	0	0	2842	0	0	194	0	0	0	0	0
OP_F059-KP_R032	Bacteria	C4-C5	86.19	192336	30807	87.13	670	99	512	801	521	810	289	-	0	0	2842	0	0	194	0	0	0	0	0
OP_F059-KP_R033	Bacteria	C4-C5	83.22	185704	37439	79.06	608	161	512	801	521	811	290	-	0	0	2842	0	0	194	0	0	0	0	0
OP_F059-KP_R034	Bacteria	C4-C5	85.97	191845	31298	85.7	659	110	512	802	521	811	290	-	0	0	2842	0	0	194	0	0	0	0	0
OP_F059-KP_R035	Bacteria	C4-C5	85.95	191798	31345	87	669	100	512	804	521	813	292	-	0	0	2842	0	0	194	0	0	0	0	0
OP_F059-KP_R036	Bacteria	C4-C5	83.1	185441	37702	79.06	608	161	512	803	521	813	292	-	0	0	2842	0	0	194	0	0	0	0	0
OP_F059-KP_R037	Bacteria	C4-C5	82.8	184754	38389	79.06	608	161	512	804	521	814	293	-	0	0	2842	0	0	194	0	0	0	0	0
OP_F059-KP_R038	Bacteria	C4-C5	85.73	191292	31851	87	669	100	512	805	521	814	293	-	0	0	2842	0	0	194	0	0	0	0	0
OP_F059-OP_R010	Bacteria	C4-C5	85.73	191297	31846	87	669	100	512	805	521	814	293	-	0	0	2842	0	0	194	0	0	0	0	0
OP_F059-OP_R014	Bacteria	C4-C5	85.73	191301	31842	87	669	100	512	805	521	814	293	-	0	0	2842	0	0	194	0	0	0	0	0
OP_F059-OP_R020	Bacteria	C4-C5	86.04	191989	31154	87	669	100	512	804	521	813	292	-	0	0	2842	0	0	194	0	0	0	0	0
OP_F059-OP_R032	Bacteria	C4-C5	86.18	192295	30848	86.74	667	102	512	801	521	810	289	-	0	0	2842	0	0	194	0	0	0	0	0
OP_F059-OP_R036	Bacteria	C4-C5	85.76	191375	31768	87	669	100	512	805	521	814	293	-	0	0	2842	0	0	194	0	0	0	0	0
OP_F059-OP_R048	Bacteria	C4-C5	85.65	191114	32029	87	669	100	512	805	521	814	293	-	0	0	2842	0	0	194	0	0	0	0	0
OP_F059-OP_R066	Bacteria	C4-C5	82.91	185013	38130	80.1	616	153	512	804	521	814	293	-	0	0	2842	0	0	194	0	0	0	0	0
OP_F059-OP_R070	Bacteria	C4-C5	85.99	191875	31268	87.39	672	97	512	804	521	813	292	-	0	0	2842	0	0	194	0	0	0	0	0
OP_F059-OP_R079	Bacteria	C4-C5	83.06	185344	37799	79.45	611	158	512	803	521	813	292	-	0	0	2842	0	0	194	0	0	0	0	0
OP_F059-OP_R086	Bacteria	C4-C5	82.81	184788	38355	78.67	605	164	512	800	521	810	289	-	0	0	2842	0	0	194	0	0	0	0	0
OP_F059-OP_R088	Bacteria	C4-C5	82.72	184580	38563	79.06	608	161	512	804	521	814	293	-	0	0	2842	0	0	194	0	0	0	0	0
OP_F059-OP_R119	Bacteria	C4-C5	85.72	191277	31866	86.09	662	107	512	805	521	814	293	-	0	0	2842	0	0	194	0	0	0	0	0
OP_F059-OP_R139	Bacteria	C4-C5	82.4	183864	39279	78.54	604	165	512	804	521	814	293	-	0	0	2842	0	0	194	0	0	0	0	0
OP_F066-KP_R039	Bacteria	C5-C6	76.13	169871	53272	84.66	651	118	783	925	792	935	142	C5-C6	0.14	4	2838	1.03	2	192	721	868	724	871	147
OP_F066-KP_R040	Bacteria	C5-C6	91.69	204593	18550	90.25	694	75	783	925	792	935	142	-	0	0	2842	0	0	194	0	0	0	0	0
OP_F066-KP_R041	Bacteria	C5-C6	91.88	205035	18108	90.25	694	75	783	924	792	934	141	-	0	0	2842	0	0	194	0	0	0	0	0
OP_F066-KP_R046	Bacteria	C5-C7	91.35	203843	19300	89.99	692	77	781	1062	792	1075	281	C5-C6	0.14	4	2838	2.06	4	190	716	994	716	994	278
OP_F066-KP_R050	Bacteria	C5-C7	93.74	209183	13960	94.8	729	40	781	1062	792	1075	281	C5-C6	26.67	758	2084	11.34	22	172	716	994	716	994	278
OP_F066-KP_R053	Bacteria	C5-C7	96.7	215789	7354	96.1	739	30	782	1076	792	1088	294	C5-V6	0.63	18	2824	3.61	7	187	1065	1356	727	1018	291
OP_F066-KP_R054	Bacteria	C5-C7	88.07	196533	26610	93.11	716	53	782	1078	792	1090	296	C5-V6	0.63	18	2824	3.61	7	187	1065	1358	727	1020	293
OP_F066-KP_R055	Bacteria	C5-C7	87.88	196106	27037	93.11	716	53	782	1079	792	1091	297	C5-V6	0.63	18	2824	3.61	7	187	1065	1359	727	1021	294
OP_F066-OP_R030	Bacteria	C5-C7	96.94	216318	6825	98.57	758	11	782	1079	792	1091	297	C5-V6	0.63	18	2824	3.61	7	187	1065	1359	727	1021	294
OP_F066-OP_R050	Bacteria	C5-C6	91.75	204744	18399	91.16	701	68	783	925	792	935	142	C5-C6	0.14	4	2838	1.03	2	192	721	868	724	871	147
OP_F066-OP_R052	Bacteria	C5-C6	92.03	205370	17773	91.16	701	68	783	925	792	935	142	C5-C6	0.14	4	2838	1.03	2	192	721	868	724	871	147
OP_F066-OP_R067	Bacteria	C5-C6	92.2	205740	17403	91.16	701	68	783	925	792	935	142	C5-C6	0.14	4	2838	1.03	2	192	721	868	724	871	147
OP_F066-OP_R089	Bacteria	C5-C6	80.21	178973	44170	87.26	671	98	782	925	792	935	142	C5-C6	0.14	4	2838	1.03	2	192	721	868	724	871	147
OP_F066-OP_R108	Bacteria	C5-C6	76.06	169724	53419	83.75	644	125	783	925	792	935	142	-	0	0	2842	0	0	194	0	0	0	0	0
OP_F066-OP_R143	Bacteria	C5-C6	76.24	170115	53028	83.75	644	125	783	924	792	934	141	-	0	0	2842	0	0	194	0	0	0	0	0
OP_F066-OP_UI005	Bacteria	C5-C6	76.15	169930	53213	83.75	644	125	783	925	792	935	142	-	0	0	2842	0	0	194	0	0	0	0	0
OP_F066-OP_UI009	Bacteria	C5-C7	90.64	202261	20882	88.82	683	86	781	1072	792	1085	291	-	0	0	2842	0	0	194	0	0	0	0	0
OP_F076-KP_R039	Bacteria	C5-C6	69.64	155408	67735	76.07	585	184	783	925	792	935	142	-	0	0	2842	0	0	194	0	0	0	0	0
OP_F076-KP_R040	Bacteria	C5-C6	85.07	189831	33312	81.66	628	141	783	925	792	935	142	-	0	0	2842	0	0	194	0	0	0	0	0
OP_F076-KP_R041	Bacteria	C5-C6	85.25	190241	32902	81.66	628	141	783	924	792	934	141	-	0	0	2842	0	0	194	0	0	0	0	0
OP_F076-KP_R046	Bacteria	C5-C7	87.04	194225	28918	80.88	622	147	782	1062	792	1075	280	-	0	0	2842	0	0	194	0	0	0	0	0
OP_F076-KP_R050	Bacteria	C5-C7	89.1	198818	24325	84.01	646	123	782	1063	792	1075	280	-	0	0	2842	0	0	194	0	0	0	0	0
OP_F076-KP_R053	Bacteria	C5-C7	89.56	199846	23297	84.79	652	117	782	1076	792	1088	294	-	0	0	2842	0	0	194	0	0	0	0	0
OP_F076-KP_R054	Bacteria	C5-C7	81.01	180769	42374	81.79	629	140	782	1078	792	1090	296	-	0	0	2842	0	0	194	0	0	0	0	0
OP_F076-KP_R055	Bacteria	C5-C7	80.83	180377	42766	81.79	629	140	782	1079	792	1091	297	-	0	0	2842	0	0	194	0	0	0	0	0
OP_F076-OP_R030	Bacteria	C5-C7	89.82	200419	22724	87.26	671	98	782	1079	792	1091	296	-	0	0	2842	0	0	194	0	0	0	0	0
OP_F076-OP_R050	Bacteria	C5-C6	85.14	189975	33168	82.57	635	134	783	925	792	935	142	-	0	0	2842	0	0	194	0	0	0	0	0
OP_F076-OP_R052	Bacteria	C5-C6	85.4	190554	32589	82.57	635	134	783	925	792	935	142	-	0	0	2842	0	0	194	0	0	0	0	0
OP_F076-OP_R067	Bacteria	C5-C6	85.55	190897	32246	82.57	635	134	783	925	792	935	142	-	0	0	2842	0	0	194	0	0	0	0	0
OP_F076-OP_R073	Bacteria	C5-C6	89.43	199555	23588	86.87	668	101	782	892	792	903	110	C5-V5	0.21	6	2836	0.52	1	193	724	838	724	838	114
OP_F076-OP_R089	Bacteria	C5-C6	73.69	164439	58704	78.67	605	164	782	925	792	935	142	-	0	0	2842	0	0	194	0	0	0	0	0
OP_F076-OP_R108	Bacteria	C5-C6	69.58	155268	67875	75.16	578	191	783	925	792	935	142	-	0	0	2842	0	0	194	0	0	0	0	0
OP_F076-OP_R143	Bacteria	C5-C6	69.74	155628	67515	75.16	578	191	783	924	792	934	141	-	0	0	2842	0	0	194	0	0	0	0	0
OP_F076-OP_UI005	Bacteria	C5-C6	69.67	155458	67685	75.16	578	191	783	925	792	935	142	-	0	0	2842	0	0	194	0	0	0	0	0
OP_F076-OP_UI009	Bacteria	C5-C7	86.34	192663	30480	79.45	611	158	782	1073	792	1085	290	-	0	0	2842	0	0	194	0	0	0	0	0
OP_F077-KP_R002	Bacteria	C3-C4	92.68	206801	16342	86.61	666	103	340	532	345	541	191	-	0	0	2842	0	0	194	0	0	0	0	0
OP_F077-KP_R021	Bacteria	C3-C4	92.3	205969	17174	86.61	666	103	340	532	345	541	191	-	0	0	2842	0	0	194	0	0	0	0	0
OP_F077-KP_R022	Bacteria	C3-C4	92.47	206341	16802	86.09	662	107	340	533	345	542	192	-	0	0	2842	0	0	194	0	0	0	0	0
OP_F077-KP_R023	Bacteria	C3-C4	92.53	206472	16671	86.09	662	107	340	533	345	542	192	-	0	0	2842	0	0	194	0	0	0	0	0
OP_F077-KP_R025	Bacteria	C3-C4	92.54	206500	16643	86.35	664	105	340	533	345	542	192	-	0	0	2842	0	0	194	0	0	0	0	0
OP_F077-KP_R070	Bacteria	C3-C4	92.48	206353	16790	86.09	662	107	340	535	345	544	194	-	0	0	2842	0	0	194	0	0	0	0	0
OP_F077-KP_R071	Bacteria	C3-C4	96.16	214582	8561	89.73	690	79	340	529	332	539	189	-	0	0	2842	0	0	194	0	0	0	0	0
OP_F077-OP_R019	Bacteria	C3-C4	86.02	191942	31201	84.4	649	120	341	532	345	541	191	-	0	0	2842	0	0	194	0	0	0	0	0
OP_F077-OP_R038	Bacteria	C3-C4	92.4	206191	16952	86.61	666	103	340	531	345	540	190	-	0	0	2842	0	0	194	0	0	0	0	0
OP_F077-OP_R040	Bacteria	C3-C4	95.9	214006	9137	89.73	690	79	340	529	332	539	189	-	0	0	2842	0	0	194	0	0	0	0	0
OP_F077-OP_R043	Bacteria	C3-C4	96.12	214497	8646	89.99	692	77	340	528	332	538	188	-	0	0	2842	0	0	194	0	0	0	0	0
OP_F077-OP_R045	Bacteria	C3-C4	92.64	206710	16433	86.09	662	107	340	533	345	542	192	-	0	0	2842	0	0	194	0	0	0	0	0
OP_F077-OP_R047	Bacteria	C3-C4	86.01	191922	31221	84.4	649	120	341	532	345	541	191	-	0	0	2842	0	0	194	0	0	0	0	0
OP_F077-OP_R051	Bacteria	C3-C4	92.1	205513	17630	86.09	662	107	340	535	345	544	194	-	0	0	2842	0	0	194	0	0	0	0	0
OP_F077-OP_R100	Bacteria	C3-C4	92.21	205760	17383	86.09	662	107	340	534	345	543	193	-	0	0	2842	0	0	194	0	0	0	0	0
OP_F077-OP_R102	Bacteria	C3-C4	92.6	206641	16502	86.61	666	103	340	535	345	544	194	-	0	0	2842	0	0	194	0	0	0	0	0
OP_F077-OP_R115	Bacteria	C3-C4	92.46	206321	16822	86.09	662	107	340	535	345	544	194	-	0	0	2842	0	0	194	0	0	0	0	0
OP_F077-OP_R146	Bacteria	C3-C4	96.15	214559	8584	89.73	690	79	340	529	332	539	189	-	0	0	2842	0	0	194	0	0	0	0	0
OP_F079-KP_R039	Bacteria	C5-C6	69.42	154915	68228	76.07	585	184	785	925	794	935	140	-	0	0	2842	0	0	194	0	0	0	0	0
OP_F079-KP_R040	Bacteria	C5-C6	84.84	189322	33821	81.66	628	141	785	925	794	935	140	-	0	0	2842	0	0	194	0	0	0	0	0
OP_F079-KP_R041	Bacteria	C5-C6	85.03	189729	33414	81.66	628	141	785	924	794	934	139	-	0	0	2842	0	0	194	0	0	0	0	0
OP_F079-KP_R046	Bacteria	C5-C7	86.81	193704	29439	80.88	622	147	784	1062	794	1075	278	-	0	0	2842	0	0	194	0	0	0	0	0
OP_F079-KP_R050	Bacteria	C5-C7	88.87	198302	24841	84.01	646	123	784	1063	794	1075	278	-	0	0	2842	0	0	194	0	0	0	0	0
OP_F079-KP_R053	Bacteria	C5-C7	89.33	199335	23808	84.79	652	117	784	1076	794	1088	292	-	0	0	2842	0	0	194	0	0	0	0	0
OP_F079-KP_R054	Bacteria	C5-C7	80.79	180288	42855	81.79	629	140	784	1078	794	1090	294	-	0	0	2842	0	0	194	0	0	0	0	0
OP_F079-KP_R055	Bacteria	C5-C7	80.62	179899	43244	81.79	629	140	784	1079	794	1091	295	-	0	0	2842	0	0	194	0	0	0	0	0
OP_F079-OP_R030	Bacteria	C5-C7	89.59	199915	23228	87.26	671	98	784	1079	794	1091	295	-	0	0	2842	0	0	194	0	0	0	0	0
OP_F079-OP_R050	Bacteria	C5-C6	84.91	189466	33677	82.57	635	134	785	925	794	935	140	-	0	0	2842	0	0	194	0	0	0	0	0
OP_F079-OP_R052	Bacteria	C5-C6	85.16	190038	33105	82.57	635	134	785	925	794	935	140	-	0	0	2842	0	0	194	0	0	0	0	0
OP_F079-OP_R067	Bacteria	C5-C6	85.32	190376	32767	82.57	635	134	785	925	794	935	140	-	0	0	2842	0	0	194	0	0	0	0	0
OP_F079-OP_R073	Bacteria	C5-C6	89.2	199035	24108	86.87	668	101	784	892	794	903	108	C5-V5	0.21	6	2836	0.52	1	193	726	838	726	838	112
OP_F079-OP_R089	Bacteria	C5-C6	73.47	163953	59190	78.67	605	164	784	925	794	935	140	-	0	0	2842	0	0	194	0	0	0	0	0
OP_F079-OP_R108	Bacteria	C5-C6	69.36	154775	68368	75.16	578	191	785	925	794	935	140	-	0	0	2842	0	0	194	0	0	0	0	0
OP_F079-OP_R143	Bacteria	C5-C6	69.52	155132	68011	75.16	578	191	785	924	794	934	139	-	0	0	2842	0	0	194	0	0	0	0	0
OP_F079-OP_UI005	Bacteria	C5-C6	69.45	154964	68179	75.16	578	191	785	925	794	935	140	-	0	0	2842	0	0	194	0	0	0	0	0
OP_F079-OP_UI009	Bacteria	C5-C7	86.11	192148	30995	79.45	611	158	784	1073	794	1085	288	-	0	0	2842	0	0	194	0	0	0	0	0
OP_F096-KP_R002	Bacteria	C3-C4	93.28	208153	14990	92.46	711	58	341	532	346	541	190	-	0	0	2842	0	0	194	0	0	0	0	0
OP_F096-KP_R021	Bacteria	C3-C4	92.91	207313	15830	92.46	711	58	341	532	346	541	190	-	0	0	2842	0	0	194	0	0	0	0	0
OP_F096-KP_R022	Bacteria	C3-C4	92.75	206974	16169	87.52	673	96	341	533	346	542	191	-	0	0	2842	0	0	194	0	0	0	0	0
OP_F096-KP_R023	Bacteria	C3-C4	92.81	207105	16038	87.52	673	96	341	533	346	542	191	-	0	0	2842	0	0	194	0	0	0	0	0
OP_F096-KP_R025	Bacteria	C3-C4	92.82	207133	16010	87.78	675	94	341	533	346	542	191	-	0	0	2842	0	0	194	0	0	0	0	0
OP_F096-KP_R070	Bacteria	C3-C4	92.76	206986	16157	87.52	673	96	341	535	346	544	193	-	0	0	2842	0	0	194	0	0	0	0	0
OP_F096-KP_R071	Bacteria	C3-C4	96.78	215958	7185	95.58	735	34	341	529	333	539	188	-	0	0	2842	0	0	194	0	0	0	0	0
OP_F096-OP_R019	Bacteria	C3-C4	86.6	193243	29900	90.25	694	75	342	532	346	541	190	-	0	0	2842	0	0	194	0	0	0	0	0
OP_F096-OP_R038	Bacteria	C3-C4	93	207535	15608	92.46	711	58	341	531	346	540	189	-	0	0	2842	0	0	194	0	0	0	0	0
OP_F096-OP_R040	Bacteria	C3-C4	96.52	215377	7766	95.58	735	34	341	529	333	539	188	-	0	0	2842	0	0	194	0	0	0	0	0
OP_F096-OP_R043	Bacteria	C3-C4	96.74	215872	7271	95.84	737	32	341	528	333	538	187	-	0	0	2842	0	0	194	0	0	0	0	0
OP_F096-OP_R045	Bacteria	C3-C4	92.92	207343	15800	87.52	673	96	341	533	346	542	191	-	0	0	2842	0	0	194	0	0	0	0	0
OP_F096-OP_R047	Bacteria	C3-C4	86.59	193223	29920	90.25	694	75	342	532	346	541	190	-	0	0	2842	0	0	194	0	0	0	0	0
OP_F096-OP_R051	Bacteria	C3-C4	92.38	206144	16999	87.52	673	96	341	535	346	544	193	-	0	0	2842	0	0	194	0	0	0	0	0
OP_F096-OP_R100	Bacteria	C3-C4	92.49	206391	16752	87.52	673	96	341	534	346	543	192	-	0	0	2842	0	0	194	0	0	0	0	0
OP_F096-OP_R102	Bacteria	C3-C4	93.21	207992	15151	92.46	711	58	341	535	346	544	193	-	0	0	2842	0	0	194	0	0	0	0	0
OP_F096-OP_R115	Bacteria	C3-C4	92.74	206954	16189	87.52	673	96	341	535	346	544	193	-	0	0	2842	0	0	194	0	0	0	0	0
OP_F096-OP_R146	Bacteria	C3-C4	96.77	215935	7208	95.58	735	34	341	529	333	539	188	-	0	0	2842	0	0	194	0	0	0	0	0
OP_F098-KP_R029	Bacteria	C4-C5	89.47	199656	23487	87	669	100	515	804	525	814	289	-	0	0	2842	0	0	194	0	0	0	0	0
OP_F098-KP_R030	Bacteria	C4-C5	90.79	202583	20560	88.3	679	90	515	796	525	806	281	-	0	0	2842	0	0	194	0	0	0	0	0
OP_F098-KP_R031	Bacteria	C4-C5	93.54	208732	14411	96.1	739	30	516	801	525	810	285	V3-C5	3.24	92	2750	9.79	19	175	448	733	445	730	285
OP_F098-KP_R032	Bacteria	C4-C5	93.51	208659	14484	95.71	736	33	516	801	525	810	285	V3-C5	3.24	92	2750	9.79	19	175	448	733	445	730	285
OP_F098-KP_R033	Bacteria	C4-C5	90.49	201932	21211	87.65	674	95	515	801	525	811	286	-	0	0	2842	0	0	194	0	0	0	0	0
OP_F098-KP_R034	Bacteria	C4-C5	93.28	208145	14998	94.28	725	44	516	802	525	811	286	-	0	0	2842	0	0	194	0	0	0	0	0
OP_F098-KP_R035	Bacteria	C4-C5	93.24	208066	15077	95.58	735	34	516	804	525	813	288	V3-C5	3.24	92	2750	9.79	19	175	448	736	445	733	288
OP_F098-KP_R036	Bacteria	C4-C5	90.36	201642	21501	87.65	674	95	515	803	525	813	288	-	0	0	2842	0	0	194	0	0	0	0	0
OP_F098-KP_R037	Bacteria	C4-C5	90.04	200930	22213	87.52	673	96	515	804	525	814	289	-	0	0	2842	0	0	194	0	0	0	0	0
OP_F098-KP_R038	Bacteria	C4-C5	93.01	207553	15590	95.45	734	35	516	805	525	814	289	V3-C5	3.24	92	2750	9.79	19	175	448	737	445	734	289
OP_F098-OP_R010	Bacteria	C4-C5	93.02	207558	15585	95.45	734	35	516	805	525	814	289	V3-C5	3.24	92	2750	9.79	19	175	448	737	445	734	289
OP_F098-OP_R014	Bacteria	C4-C5	93.02	207562	15581	95.45	734	35	516	805	525	814	289	V3-C5	3.24	92	2750	9.79	19	175	448	737	445	734	289
OP_F098-OP_R020	Bacteria	C4-C5	93.34	208275	14868	95.58	735	34	516	804	525	813	288	V3-C5	3.24	92	2750	9.79	19	175	448	736	445	733	288
OP_F098-OP_R032	Bacteria	C4-C5	93.49	208618	14525	95.32	733	36	516	801	525	810	285	V3-C5	3.24	92	2750	9.79	19	175	448	733	445	730	285
OP_F098-OP_R036	Bacteria	C4-C5	93.05	207643	15500	95.45	734	35	516	805	525	814	289	V3-C5	3.24	92	2750	9.79	19	175	448	737	445	734	289
OP_F098-OP_R048	Bacteria	C4-C5	92.93	207357	15786	95.45	734	35	516	805	525	814	289	V3-C5	3.24	92	2750	9.79	19	175	448	737	445	734	289
OP_F098-OP_R066	Bacteria	C4-C5	90.17	201202	21941	88.56	681	88	515	804	525	814	289	-	0	0	2842	0	0	194	0	0	0	0	0
OP_F098-OP_R070	Bacteria	C4-C5	93.28	208143	15000	95.97	738	31	516	804	525	813	288	V3-C5	3.24	92	2750	9.79	19	175	448	736	445	733	288
OP_F098-OP_R079	Bacteria	C4-C5	90.31	201527	21616	88.04	677	92	515	803	525	813	288	-	0	0	2842	0	0	194	0	0	0	0	0
OP_F098-OP_R086	Bacteria	C4-C5	90.04	200927	22216	87.26	671	98	515	800	525	810	285	-	0	0	2842	0	0	194	0	0	0	0	0
OP_F098-OP_R088	Bacteria	C4-C5	89.96	200738	22405	87.52	673	96	515	804	525	814	289	-	0	0	2842	0	0	194	0	0	0	0	0
OP_F098-OP_R119	Bacteria	C4-C5	93.01	207553	15590	94.54	727	42	516	805	525	814	289	-	0	0	2842	0	0	194	0	0	0	0	0
OP_F098-OP_R139	Bacteria	C4-C5	89.6	199947	23196	87	669	100	515	804	525	814	289	-	0	0	2842	0	0	194	0	0	0	0	0
OP_F100-KP_R029	Bacteria	C4-C5	89.28	199233	23910	86.87	668	101	512	804	522	814	292	-	0	0	2842	0	0	194	0	0	0	0	0
OP_F100-KP_R030	Bacteria	C4-C5	90.59	202149	20994	88.17	678	91	512	796	522	806	284	V3-C5	0.07	2	2840	0.52	1	193	465	749	465	749	284
OP_F100-KP_R033	Bacteria	C4-C5	90.3	201499	21644	87.52	673	96	512	801	522	811	289	V3-C5	0.21	6	2836	0.52	1	193	453	743	453	743	290
OP_F100-KP_R034	Bacteria	C4-C5	93.08	207701	15442	94.15	724	45	513	802	522	811	289	V3-C5	1.86	53	2789	5.67	11	183	548	838	441	731	289
OP_F100-KP_R036	Bacteria	C4-C5	90.17	201210	21933	87.52	673	96	512	803	522	813	291	V3-C5	0.21	6	2836	0.52	1	193	453	745	453	745	292
OP_F100-KP_R037	Bacteria	C4-C5	89.85	200502	22641	87.39	672	97	512	804	522	814	292	V3-C5	0.21	6	2836	0.52	1	193	453	746	453	746	293
OP_F100-OP_R066	Bacteria	C4-C5	89.97	200773	22370	88.43	680	89	512	804	522	814	292	V3-C5	0.28	8	2834	1.03	2	192	456	748	453	746	292
OP_F100-OP_R079	Bacteria	C4-C5	90.12	201097	22046	87.91	676	93	512	803	522	813	291	V3-C5	0.21	6	2836	0.52	1	193	453	745	453	745	292
OP_F100-OP_R086	Bacteria	C4-C5	89.85	200498	22645	87.13	670	99	512	800	522	810	288	-	0	0	2842	0	0	194	0	0	0	0	0
OP_F100-OP_R088	Bacteria	C4-C5	89.77	200312	22831	87.39	672	97	512	804	522	814	292	V3-C5	0.21	6	2836	0.52	1	193	453	746	453	746	293
OP_F100-OP_R119	Bacteria	C4-C5	92.82	207112	16031	94.41	726	43	513	805	522	814	292	V3-C5	1.79	51	2791	4.64	9	185	558	851	441	734	293
OP_F100-OP_R139	Bacteria	C4-C5	89.41	199524	23619	86.87	668	101	512	804	522	814	292	-	0	0	2842	0	0	194	0	0	0	0	0
OP_F101-KP_R046	Bacteria	C6-C7	85.63	191071	32072	87.78	675	94	915	1063	925	1075	148	-	0	0	2842	0	0	194	0	0	0	0	0
OP_F101-KP_R050	Bacteria	C6-C7	87.6	195463	27680	90.64	697	72	915	1063	925	1075	148	-	0	0	2842	0	0	194	0	0	0	0	0
OP_F101-KP_R053	Bacteria	C6-C7	90.05	200934	22209	90.77	698	71	916	1077	925	1088	161	-	0	0	2842	0	0	194	0	0	0	0	0
OP_F101-KP_R054	Bacteria	C6-C7	81.49	181832	41311	88.17	678	91	916	1079	925	1090	163	-	0	0	2842	0	0	194	0	0	0	0	0
OP_F101-KP_R055	Bacteria	C6-C7	81.31	181436	41707	88.17	678	91	916	1080	925	1091	164	-	0	0	2842	0	0	194	0	0	0	0	0
OP_F101-KP_R056	Bacteria	C6-V7	85.39	190546	32597	77.11	593	176	916	1114	925	1125	198	-	0	0	2842	0	0	194	0	0	0	0	0
OP_F101-KP_R057	Bacteria	C6-V7	82.58	184280	38863	77.89	599	170	916	1114	925	1125	198	-	0	0	2842	0	0	194	0	0	0	0	0
OP_F101-KP_R074	Bacteria	C6-V7	90.9	202832	20311	93.24	717	52	915	1114	925	1125	198	-	0	0	2842	0	0	194	0	0	0	0	0
OP_F101-OP_R026	Bacteria	C6-V7	81.86	182671	40472	74.51	573	196	916	1114	925	1125	198	-	0	0	2842	0	0	194	0	0	0	0	0
OP_F101-OP_R029	Bacteria	C6-C8	87.89	196129	27014	86.35	664	105	916	1193	925	1204	278	-	0	0	2842	0	0	194	0	0	0	0	0
OP_F101-OP_R030	Bacteria	C6-C7	90.36	201643	21500	93.63	720	49	915	1080	925	1091	164	-	0	0	2842	0	0	194	0	0	0	0	0
OP_F101-OP_UI009	Bacteria	C6-C7	84.8	189228	33915	86.09	662	107	915	1073	925	1085	158	-	0	0	2842	0	0	194	0	0	0	0	0
OP_F108-KP_R002	Bacteria	C3-C4	93.31	208209	14934	92.46	711	58	342	532	347	541	189	-	0	0	2842	0	0	194	0	0	0	0	0
OP_F108-KP_R021	Bacteria	C3-C4	92.93	207369	15774	92.46	711	58	342	532	347	541	189	-	0	0	2842	0	0	194	0	0	0	0	0
OP_F108-KP_R022	Bacteria	C3-C4	92.78	207030	16113	87.52	673	96	342	533	347	542	190	-	0	0	2842	0	0	194	0	0	0	0	0
OP_F108-KP_R023	Bacteria	C3-C4	92.84	207161	15982	87.52	673	96	342	533	347	542	190	-	0	0	2842	0	0	194	0	0	0	0	0
OP_F108-KP_R025	Bacteria	C3-C4	92.85	207189	15954	87.78	675	94	342	533	347	542	190	-	0	0	2842	0	0	194	0	0	0	0	0
OP_F108-KP_R070	Bacteria	C3-C4	92.78	207042	16101	87.52	673	96	342	535	347	544	192	-	0	0	2842	0	0	194	0	0	0	0	0
OP_F108-KP_R071	Bacteria	C3-C4	96.81	216018	7125	95.58	735	34	342	529	334	539	187	-	0	0	2842	0	0	194	0	0	0	0	0
OP_F108-OP_R019	Bacteria	C3-C4	86.62	193298	29845	90.25	694	75	343	532	347	541	189	-	0	0	2842	0	0	194	0	0	0	0	0
OP_F108-OP_R038	Bacteria	C3-C4	93.03	207591	15552	92.46	711	58	342	531	347	540	188	-	0	0	2842	0	0	194	0	0	0	0	0
OP_F108-OP_R040	Bacteria	C3-C4	96.55	215437	7706	95.58	735	34	342	529	334	539	187	-	0	0	2842	0	0	194	0	0	0	0	0
OP_F108-OP_R043	Bacteria	C3-C4	96.77	215932	7211	95.84	737	32	342	528	334	538	186	-	0	0	2842	0	0	194	0	0	0	0	0
OP_F108-OP_R045	Bacteria	C3-C4	92.94	207399	15744	87.52	673	96	342	533	347	542	190	-	0	0	2842	0	0	194	0	0	0	0	0
OP_F108-OP_R047	Bacteria	C3-C4	86.62	193278	29865	90.25	694	75	343	532	347	541	189	-	0	0	2842	0	0	194	0	0	0	0	0
OP_F108-OP_R051	Bacteria	C3-C4	92.41	206200	16943	87.52	673	96	342	535	347	544	192	-	0	0	2842	0	0	194	0	0	0	0	0
OP_F108-OP_R100	Bacteria	C3-C4	92.52	206447	16696	87.52	673	96	342	534	347	543	191	-	0	0	2842	0	0	194	0	0	0	0	0
OP_F108-OP_R102	Bacteria	C3-C4	93.23	208048	15095	92.46	711	58	342	535	347	544	192	-	0	0	2842	0	0	194	0	0	0	0	0
OP_F108-OP_R115	Bacteria	C3-C4	92.77	207010	16133	87.52	673	96	342	535	347	544	192	-	0	0	2842	0	0	194	0	0	0	0	0
OP_F108-OP_R146	Bacteria	C3-C4	96.8	215995	7148	95.58	735	34	342	529	334	539	187	-	0	0	2842	0	0	194	0	0	0	0	0
OP_F114-KP_R021	Bacteria	C3-C4	93.32	208247	14896	92.46	711	58	343	532	348	541	188	C3-V3	3.24	92	2750	9.79	19	175	314	464	311	461	150
OP_F114-KP_R022	Bacteria	C3-C4	93.17	207910	15233	87.52	673	96	343	533	348	542	189	C3-V3	1.83	52	2790	4.12	8	186	317	468	327	478	151
OP_F114-KP_R023	Bacteria	C3-C4	93.23	208041	15102	87.52	673	96	343	533	348	542	189	C3-V3	1.83	52	2790	4.12	8	186	317	468	327	478	151
OP_F114-KP_R025	Bacteria	C3-C4	93.24	208069	15074	87.78	675	94	343	533	348	542	189	C3-V3	1.83	52	2790	4.12	8	186	317	468	327	478	151
OP_F114-KP_R070	Bacteria	C3-C4	93.18	207923	15220	87.52	673	96	343	535	348	544	191	C3-V3	42.22	1200	1642	59.28	115	79	329	485	315	470	156
OP_F114-KP_R071	Bacteria	C3-C4	97.22	216934	6209	95.58	735	34	343	529	335	539	186	C3-V3	52.08	1480	1362	63.92	124	70	318	467	315	470	149
OP_F114-OP_R019	Bacteria	C3-C4	86.99	194106	29037	90.25	694	75	344	532	348	541	188	C3-V3	0.07	2	2840	1.03	2	192	323	474	321	473	150
OP_F114-OP_R038	Bacteria	C3-C4	93.42	208470	14673	92.46	711	58	343	531	348	540	187	C3-V3	3.24	92	2750	9.79	19	175	314	463	311	460	149
OP_F114-OP_R040	Bacteria	C3-C4	96.95	216349	6794	95.58	735	34	343	529	335	539	186	C3-V3	3.24	92	2750	9.79	19	175	314	462	311	459	148
OP_F114-OP_R043	Bacteria	C3-C4	97.18	216845	6298	95.84	737	32	343	528	335	538	185	C3-V3	3.24	92	2750	9.79	19	175	314	461	311	458	147
OP_F114-OP_R045	Bacteria	C3-C4	93.34	208282	14861	87.52	673	96	343	533	348	542	189	C3-V3	1.83	52	2790	4.12	8	186	317	468	327	478	151
OP_F114-OP_R047	Bacteria	C3-C4	86.98	194086	29057	90.25	694	75	344	532	348	541	188	C3-V3	0.04	1	2841	0.52	1	193	325	474	325	474	149
OP_F114-OP_R051	Bacteria	C3-C4	92.8	207075	16068	87.52	673	96	343	535	348	544	191	C3-V3	1.83	52	2790	4.12	8	186	317	470	327	480	153
OP_F114-OP_R100	Bacteria	C3-C4	92.91	207325	15818	87.52	673	96	343	534	348	543	190	C3-V3	1.83	52	2790	4.12	8	186	317	469	327	479	152
OP_F114-OP_R115	Bacteria	C3-C4	93.16	207891	15252	87.52	673	96	343	535	348	544	191	C3-V3	1.83	52	2790	4.12	8	186	317	470	327	480	153
OP_F114-OP_R146	Bacteria	C3-C4	97.21	216911	6232	95.58	735	34	343	529	335	539	186	C3-V3	3.24	92	2750	9.79	19	175	314	462	311	459	148
OP_F116-OP_R055	Bacteria	C7-C9	84.67	188928	34215	74.77	575	194	1098	1386	1110	1397	287	-	0	0	2842	0	0	194	0	0	0	0	0
OP_F116-OP_R101	Bacteria	C7-C9	84.94	189547	33596	75.03	577	192	1098	1385	1110	1396	286	-	0	0	2842	0	0	194	0	0	0	0	0
OP_F118-KP_R039	Bacteria	C5-C6	69.68	155488	67655	75.55	581	188	782	925	791	935	143	-	0	0	2842	0	0	194	0	0	0	0	0
OP_F118-KP_R040	Bacteria	C5-C6	85.12	189931	33212	81.14	624	145	782	925	791	935	143	-	0	0	2842	0	0	194	0	0	0	0	0
OP_F118-KP_R041	Bacteria	C5-C6	85.3	190340	32803	81.14	624	145	782	924	791	934	142	-	0	0	2842	0	0	194	0	0	0	0	0
OP_F118-KP_R046	Bacteria	C5-C7	87.09	194338	28805	80.88	622	147	781	1062	791	1075	281	-	0	0	2842	0	0	194	0	0	0	0	0
OP_F118-KP_R050	Bacteria	C5-C7	89.15	198928	24215	84.01	646	123	781	1063	791	1075	281	-	0	0	2842	0	0	194	0	0	0	0	0
OP_F118-KP_R053	Bacteria	C5-C7	89.6	199945	23198	84.27	648	121	781	1076	791	1088	295	-	0	0	2842	0	0	194	0	0	0	0	0
OP_F118-KP_R054	Bacteria	C5-C7	81.05	180862	42281	81.27	625	144	781	1078	791	1090	297	-	0	0	2842	0	0	194	0	0	0	0	0
OP_F118-KP_R055	Bacteria	C5-C7	80.88	180469	42674	81.27	625	144	781	1079	791	1091	298	-	0	0	2842	0	0	194	0	0	0	0	0
OP_F118-OP_R030	Bacteria	C5-C7	89.86	200520	22623	86.74	667	102	781	1079	791	1091	297	-	0	0	2842	0	0	194	0	0	0	0	0
OP_F118-OP_R050	Bacteria	C5-C6	85.18	190075	33068	82.05	631	138	782	925	791	935	143	-	0	0	2842	0	0	194	0	0	0	0	0
OP_F118-OP_R052	Bacteria	C5-C6	85.44	190654	32489	82.05	631	138	782	925	791	935	143	-	0	0	2842	0	0	194	0	0	0	0	0
OP_F118-OP_R067	Bacteria	C5-C6	85.59	191000	32143	82.05	631	138	782	925	791	935	143	-	0	0	2842	0	0	194	0	0	0	0	0
OP_F118-OP_R073	Bacteria	C5-C6	89.47	199655	23488	86.35	664	105	781	892	791	903	111	-	0	0	2842	0	0	194	0	0	0	0	0
OP_F118-OP_R089	Bacteria	C5-C6	73.73	164520	58623	78.15	601	168	781	925	791	935	143	-	0	0	2842	0	0	194	0	0	0	0	0
OP_F118-OP_R108	Bacteria	C5-C6	69.62	155348	67795	74.64	574	195	782	925	791	935	143	-	0	0	2842	0	0	194	0	0	0	0	0
OP_F118-OP_R143	Bacteria	C5-C6	69.78	155707	67436	74.64	574	195	782	924	791	934	142	-	0	0	2842	0	0	194	0	0	0	0	0
OP_F118-OP_UI005	Bacteria	C5-C6	69.7	155538	67605	74.64	574	195	782	925	791	935	143	-	0	0	2842	0	0	194	0	0	0	0	0
OP_F118-OP_UI009	Bacteria	C5-C7	86.39	192770	30373	79.45	611	158	781	1073	791	1085	291	-	0	0	2842	0	0	194	0	0	0	0	0
OP_UI006-KP_R029	Bacteria	C4-C5	88.96	198502	24641	81.66	628	141	516	804	526	814	288	-	0	0	2842	0	0	194	0	0	0	0	0
OP_UI006-KP_R030	Bacteria	C4-C5	90.26	201411	21732	82.83	637	132	516	796	526	806	280	-	0	0	2842	0	0	194	0	0	0	0	0
OP_UI006-KP_R031	Bacteria	C4-C5	93.01	207545	15598	90.64	697	72	517	801	526	810	284	V3-C5	1.83	52	2790	4.12	8	186	452	736	462	746	284
OP_UI006-KP_R032	Bacteria	C4-C5	92.98	207472	15671	90.25	694	75	517	801	526	810	284	V3-C5	1.83	52	2790	4.12	8	186	452	736	462	746	284
OP_UI006-KP_R033	Bacteria	C4-C5	89.97	200767	22376	82.18	632	137	516	801	526	811	285	-	0	0	2842	0	0	194	0	0	0	0	0
OP_UI006-KP_R034	Bacteria	C4-C5	92.75	206964	16179	88.82	683	86	517	802	526	811	285	-	0	0	2842	0	0	194	0	0	0	0	0
OP_UI006-KP_R035	Bacteria	C4-C5	92.71	206884	16259	90.12	693	76	517	804	526	813	287	V3-C5	1.83	52	2790	4.12	8	186	452	739	462	749	287
OP_UI006-KP_R036	Bacteria	C4-C5	89.84	200477	22666	82.18	632	137	516	803	526	813	287	-	0	0	2842	0	0	194	0	0	0	0	0
OP_UI006-KP_R037	Bacteria	C4-C5	89.53	199770	23373	82.18	632	137	516	804	526	814	288	-	0	0	2842	0	0	194	0	0	0	0	0
OP_UI006-KP_R038	Bacteria	C4-C5	92.48	206374	16769	90.12	693	76	517	805	526	814	288	V3-C5	1.83	52	2790	4.12	8	186	452	740	462	750	288
OP_UI006-OP_R010	Bacteria	C4-C5	92.49	206379	16764	90.12	693	76	517	805	526	814	288	V3-C5	1.83	52	2790	4.12	8	186	452	740	462	750	288
OP_UI006-OP_R014	Bacteria	C4-C5	92.49	206383	16760	90.12	693	76	517	805	526	814	288	V3-C5	1.83	52	2790	4.12	8	186	452	740	462	750	288
OP_UI006-OP_R020	Bacteria	C4-C5	92.81	207091	16052	90.12	693	76	517	804	526	813	287	V3-C5	1.83	52	2790	4.12	8	186	452	739	462	749	287
OP_UI006-OP_R032	Bacteria	C4-C5	92.96	207431	15712	89.86	691	78	517	801	526	810	284	V3-C5	1.83	52	2790	4.12	8	186	452	736	462	746	284
OP_UI006-OP_R036	Bacteria	C4-C5	92.53	206464	16679	90.12	693	76	517	805	526	814	288	V3-C5	1.83	52	2790	4.12	8	186	452	740	462	750	288
OP_UI006-OP_R048	Bacteria	C4-C5	92.4	206180	16963	90.12	693	76	517	805	526	814	288	V3-C5	1.83	52	2790	4.12	8	186	452	740	462	750	288
OP_UI006-OP_R066	Bacteria	C4-C5	89.65	200039	23104	83.22	640	129	516	804	526	814	288	-	0	0	2842	0	0	194	0	0	0	0	0
OP_UI006-OP_R070	Bacteria	C4-C5	92.75	206961	16182	90.51	696	73	517	804	526	813	287	V3-C5	1.83	52	2790	4.12	8	186	452	739	462	749	287
OP_UI006-OP_R079	Bacteria	C4-C5	89.79	200364	22779	82.57	635	134	516	803	526	813	287	-	0	0	2842	0	0	194	0	0	0	0	0
OP_UI006-OP_R086	Bacteria	C4-C5	89.52	199763	23380	81.79	629	140	516	800	526	810	284	-	0	0	2842	0	0	194	0	0	0	0	0
OP_UI006-OP_R088	Bacteria	C4-C5	89.44	199580	23563	82.18	632	137	516	804	526	814	288	-	0	0	2842	0	0	194	0	0	0	0	0
OP_UI006-OP_R119	Bacteria	C4-C5	92.48	206373	16770	89.21	686	83	517	805	526	814	288	-	0	0	2842	0	0	194	0	0	0	0	0
OP_UI006-OP_R139	Bacteria	C4-C5	89.09	198790	24353	81.66	628	141	516	804	526	814	288	-	0	0	2842	0	0	194	0	0	0	0	0
KP_F015-KP_R002	Archaea	-	0	0	223143	0	0	769	0	0	0	0	0	C3-V3	59.29	1685	1157	75.77	147	47	329	473	324	472	144
KP_F015-KP_R003	Archaea	-	0	0	223143	0	0	769	0	0	0	0	0	C3-V3	59.22	1683	1159	75.26	146	48	329	477	324	476	148
KP_F015-OP_R102	Archaea	-	0	0	223143	0	0	769	0	0	0	0	0	C3-V3	59.25	1684	1158	75.26	146	48	329	476	324	475	147
KP_F016-KP_R002	Archaea	-	0	0	223143	0	0	769	0	0	0	0	0	C3-V3	64.46	1832	1010	95.36	185	9	323	477	314	472	154
KP_F016-KP_R003	Archaea	-	0	0	223143	0	0	769	0	0	0	0	0	C3-V3	64.39	1830	1012	94.85	184	10	323	481	314	476	158
KP_F016-OP_R102	Archaea	-	0	0	223143	0	0	769	0	0	0	0	0	C3-V3	64.43	1831	1011	94.85	184	10	323	480	314	475	157
KP_F018-KP_R002	Archaea	-	0	0	223143	0	0	769	0	0	0	0	0	C3-V3	82.44	2343	499	95.88	186	8	330	475	322	465	144
KP_F018-KP_R003	Archaea	-	0	0	223143	0	0	769	0	0	0	0	0	C3-V3	82.27	2338	504	95.36	185	9	330	479	322	469	148
KP_F018-OP_R102	Archaea	-	0	0	223143	0	0	769	0	0	0	0	0	C3-V3	82.37	2341	501	95.36	185	9	330	478	322	468	147
KP_F019-KP_R005	Archaea	-	0	0	223143	0	0	769	0	0	0	0	0	V3-C5	72.27	2054	788	76.8	149	45	457	749	447	738	292
KP_F019-KP_R031	Archaea	-	0	0	223143	0	0	769	0	0	0	0	0	V3-C5	72.66	2065	777	78.35	152	42	457	745	447	734	288
KP_F019-KP_R032	Archaea	-	0	0	223143	0	0	769	0	0	0	0	0	V3-C5	72.7	2066	776	78.35	152	42	457	745	447	734	288
KP_F019-KP_R035	Archaea	-	0	0	223143	0	0	769	0	0	0	0	0	V3-C5	72.62	2064	778	78.35	152	42	457	748	447	737	291
KP_F019-KP_R038	Archaea	-	0	0	223143	0	0	769	0	0	0	0	0	V3-C5	72.52	2061	781	77.32	150	44	457	749	447	738	292
KP_F019-OP_R010	Archaea	-	0	0	223143	0	0	769	0	0	0	0	0	V3-C5	72.52	2061	781	77.32	150	44	457	749	447	738	292
KP_F019-OP_R014	Archaea	-	0	0	223143	0	0	769	0	0	0	0	0	V3-C5	72.55	2062	780	77.32	150	44	457	749	447	738	292
KP_F019-OP_R020	Archaea	-	0	0	223143	0	0	769	0	0	0	0	0	V3-C5	72.62	2064	778	78.35	152	42	457	748	447	737	291
KP_F019-OP_R032	Archaea	-	0	0	223143	0	0	769	0	0	0	0	0	V3-C5	68.44	1945	897	69.07	134	60	453	741	447	734	288
KP_F019-OP_R036	Archaea	-	0	0	223143	0	0	769	0	0	0	0	0	V3-C5	72.55	2062	780	77.32	150	44	457	749	447	738	292
KP_F019-OP_R048	Archaea	-	0	0	223143	0	0	769	0	0	0	0	0	V3-C5	72.55	2062	780	77.32	150	44	457	749	447	738	292
KP_F019-OP_R070	Archaea	-	0	0	223143	0	0	769	0	0	0	0	0	V3-C5	72.62	2064	778	78.35	152	42	457	748	447	737	291
KP_F020-KP_R005	Archaea	C4-C5	2.8	6238	216905	24.32	187	582	537	824	539	826	287	V3-C5	83.57	2375	467	97.94	190	4	460	749	450	738	289
KP_F022-KP_R013	Archaea	-	0	0	223143	0	0	769	0	0	0	0	0	V5-C6	81.28	2310	532	91.24	177	17	859	1000	850	990	141
KP_F022-KP_R014	Archaea	-	0	0	223143	0	0	769	0	0	0	0	0	V5-C6	80.33	2283	559	85.05	165	29	859	1004	850	994	145
KP_F022-KP_R015	Archaea	-	0	0	223143	0	0	769	0	0	0	0	0	C6-C7	62.1	1765	1077	80.41	156	38	862	1057	858	1049	195
KP_F022-KP_R074	Archaea	-	0	0	223143	0	0	769	0	0	0	0	0	C6-C7	62.95	1789	1053	81.96	159	35	862	1057	858	1049	195
KP_F023-KP_R013	Archaea	-	0	0	223143	0	0	769	0	0	0	0	0	V5-C6	81.21	2308	534	91.24	177	17	859	1000	850	990	141
KP_F023-KP_R014	Archaea	-	0	0	223143	0	0	769	0	0	0	0	0	V5-C6	80.26	2281	561	85.05	165	29	859	1004	850	994	145
KP_F023-KP_R015	Archaea	-	0	0	223143	0	0	769	0	0	0	0	0	C6-C7	62.03	1763	1079	80.41	156	38	862	1057	858	1049	195
KP_F023-KP_R074	Archaea	-	0	0	223143	0	0	769	0	0	0	0	0	C6-C7	62.88	1787	1055	81.96	159	35	862	1057	858	1049	195
KP_F025-KP_R014	Archaea	-	0	0	223143	0	0	769	0	0	0	0	0	C6-C6	58.27	1656	1186	76.29	148	46	905	1006	902	999	101
KP_F025-KP_R015	Archaea	-	0	0	223143	0	0	769	0	0	0	0	0	C6-C7	56.76	1613	1229	75.77	147	47	906	1058	902	1049	152
KP_F025-KP_R074	Archaea	-	0	0	223143	0	0	769	0	0	0	0	0	C6-C7	57.88	1645	1197	77.84	151	43	906	1057	902	1049	152
KP_F026-KP_R014	Archaea	-	0	0	223143	0	0	769	0	0	0	0	0	C6-C6	58.27	1656	1186	76.29	148	46	905	1006	902	999	101
KP_F026-KP_R015	Archaea	-	0	0	223143	0	0	769	0	0	0	0	0	C6-C7	56.76	1613	1229	75.77	147	47	906	1058	902	1049	152
KP_F026-KP_R074	Archaea	-	0	0	223143	0	0	769	0	0	0	0	0	C6-C7	57.88	1645	1197	77.84	151	43	906	1057	902	1049	152
KP_F059-KP_R006	Archaea	-	0	0	223143	0	0	769	0	0	0	0	0	C5-C6	81.6	2319	523	95.36	185	9	727	874	716	863	147
KP_F059-KP_R007	Archaea	-	0	0	223143	0	0	769	0	0	0	0	0	C5-C6	81.42	2314	528	92.78	180	14	725	879	716	870	155
KP_F059-KP_R008	Archaea	-	0	0	223143	0	0	769	0	0	0	0	0	C5-C6	80.93	2300	542	91.24	177	17	725	875	716	866	151
KP_F059-KP_R010	Archaea	-	0	0	223143	0	0	769	0	0	0	0	0	C5-C6	59.71	1697	1145	84.02	163	31	727	925	724	921	198
KP_F059-KP_R013	Archaea	-	0	0	223143	0	0	769	0	0	0	0	0	C5-C6	82.37	2341	501	95.36	185	9	727	1002	716	990	275
KP_F059-KP_R014	Archaea	C5-V6	9.93	22155	200988	24.84	191	578	770	1051	758	1046	281	C5-C6	81.49	2316	526	89.69	174	20	728	1006	716	994	279
KP_F059-KP_R072	Archaea	C5-C6	0.03	56	223087	2.99	23	746	779	910	777	906	132	C5-C6	81.91	2328	514	95.88	186	8	727	869	716	858	142
KP_F059-OP_R012	Archaea	-	0	0	223143	0	0	769	0	0	0	0	0	C5-C6	81.84	2326	516	93.3	181	13	725	879	716	870	155
KP_F082-KP_R006	Archaea	-	0	0	223143	0	0	769	0	0	0	0	0	C5-C6	77.13	2192	650	85.05	165	29	728	871	720	863	143
KP_F082-KP_R007	Archaea	-	0	0	223143	0	0	769	0	0	0	0	0	C5-C6	77.59	2205	637	86.08	167	27	728	878	720	870	151
KP_F082-KP_R008	Archaea	-	0	0	223143	0	0	769	0	0	0	0	0	C5-C6	77.09	2191	651	84.54	164	30	728	874	720	866	147
KP_F082-KP_R010	Archaea	-	0	0	223143	0	0	769	0	0	0	0	0	C5-C6	59.01	1677	1165	80.93	157	37	727	921	728	921	194
KP_F082-KP_R013	Archaea	-	0	0	223143	0	0	769	0	0	0	0	0	C5-C6	77.97	2216	626	86.08	167	27	728	998	720	990	271
KP_F082-KP_R014	Archaea	C5-C7	0.28	614	222529	6.76	52	717	800	1077	806	1083	277	C5-C6	77.09	2191	651	80.41	156	38	728	1003	720	994	275
KP_F082-KP_R072	Archaea	C5-C6	0	1	223142	0.13	1	768	793	928	793	928	135	C5-C6	77.45	2201	641	85.57	166	28	728	866	720	858	138
KP_F082-OP_R012	Archaea	-	0	0	223143	0	0	769	0	0	0	0	0	C5-C6	78.01	2217	625	86.6	168	26	728	878	720	870	151
KP_F082-OP_R073	Archaea	C5-C6	3.12	6966	216177	25.75	198	571	803	910	808	915	107	C5-V5	77.45	2201	641	82.99	161	33	728	838	720	830	110
KP_F083-KP_R013	Archaea	-	0	0	223143	0	0	769	0	0	0	0	0	V5-C6	81.49	2316	526	93.81	182	12	853	1002	841	990	150
KP_F083-KP_R014	Archaea	C6-V6	0	3	223140	0.39	3	766	916	1075	877	1036	159	V5-C6	80.44	2286	556	87.63	170	24	853	1006	841	994	154
KP_F083-KP_R015	Archaea	-	0	0	223143	0	0	769	0	0	0	0	0	V5-C7	62.77	1784	1058	84.54	164	30	856	1060	849	1049	204
KP_F083-KP_R074	Archaea	C6-C7	0.03	59	223084	3.38	26	743	895	1101	889	1094	207	V5-C7	63.9	1816	1026	86.6	168	26	856	1060	849	1049	204
OP_F009-KP_R006	Archaea	-	0	0	223143	0	0	769	0	0	0	0	0	C5-C6	77.3	2197	645	86.08	167	27	724	871	716	863	147
OP_F009-KP_R007	Archaea	-	0	0	223143	0	0	769	0	0	0	0	0	C5-C6	77.76	2210	632	87.11	169	25	724	878	716	870	155
OP_F009-KP_R008	Archaea	-	0	0	223143	0	0	769	0	0	0	0	0	C5-C6	77.27	2196	646	85.57	166	28	724	874	716	866	151
OP_F009-KP_R010	Archaea	-	0	0	223143	0	0	769	0	0	0	0	0	C5-C6	59.04	1678	1164	80.41	156	38	723	921	724	921	198
OP_F009-KP_R013	Archaea	-	0	0	223143	0	0	769	0	0	0	0	0	C5-C6	78.08	2219	623	86.08	167	27	724	998	716	990	275
OP_F009-KP_R014	Archaea	C5-V6	6.91	15424	207719	23.67	182	587	774	1054	758	1037	280	C5-C6	77.2	2194	648	80.41	156	38	724	1003	716	994	279
OP_F009-KP_R072	Archaea	C5-C6	0.03	56	223087	2.99	23	746	779	910	777	906	132	C5-C6	77.62	2206	636	86.6	168	26	724	866	716	858	142
OP_F009-OP_R012	Archaea	-	0	0	223143	0	0	769	0	0	0	0	0	C5-C6	78.18	2222	620	87.63	170	24	724	878	716	870	155
OP_F014-KP_R005	Archaea	C4-C5	2.79	6218	216925	24.32	187	582	533	824	535	826	291	V3-C5	75.69	2151	691	87.63	170	24	455	748	446	738	293
OP_F043-KP_R003	Archaea	C3-C4	0.04	99	223044	9.62	74	695	342	530	335	538	187	C3-V3	78.08	2219	623	81.44	158	36	318	475	314	469	157
OP_F066-KP_R006	Archaea	-	0	0	223143	0	0	769	0	0	0	0	0	C5-C6	82.16	2335	507	95.88	186	8	727	874	716	863	147
OP_F066-KP_R007	Archaea	-	0	0	223143	0	0	769	0	0	0	0	0	C5-C6	81.98	2330	512	93.3	181	13	725	879	716	870	155
OP_F066-KP_R008	Archaea	-	0	0	223143	0	0	769	0	0	0	0	0	C5-C6	81.49	2316	526	91.75	178	16	725	875	716	866	151
OP_F066-KP_R010	Archaea	-	0	0	223143	0	0	769	0	0	0	0	0	C5-C6	60.06	1707	1135	84.54	164	30	727	925	724	921	198
OP_F066-KP_R013	Archaea	-	0	0	223143	0	0	769	0	0	0	0	0	C5-C6	82.93	2357	485	95.88	186	8	727	1002	716	990	275
OP_F066-KP_R014	Archaea	C5-V6	9.98	22269	200874	24.84	191	578	770	1051	758	1046	281	C5-C6	82.05	2332	510	90.21	175	19	728	1006	716	994	279
OP_F066-KP_R072	Archaea	C5-C6	0.03	57	223086	3.12	24	745	779	910	777	906	132	C5-C6	82.48	2344	498	96.39	187	7	727	869	716	858	142
OP_F066-OP_R012	Archaea	-	0	0	223143	0	0	769	0	0	0	0	0	C5-C6	82.41	2342	500	93.81	182	12	725	879	716	870	155
OP_F100-KP_R005	Archaea	C4-C5	2.79	6226	216917	24.32	187	582	533	824	535	826	291	V3-C5	75.93	2158	684	87.63	170	24	455	748	446	738	293
OP_F114-KP_R003	Archaea	C3-C4	0.04	99	223044	9.62	74	695	342	530	335	538	187	C3-V3	84.1	2390	452	98.45	191	3	322	478	314	469	156
KP_F020-KP_R031	Universal	C4-C5	93.56	208778	14365	95.97	738	31	517	801	526	810	284	V3-C5	83.88	2384	458	98.97	192	2	460	745	450	734	285
KP_F020-KP_R032	Universal	C4-C5	93.53	208705	14438	95.58	735	34	517	801	526	810	284	V3-C5	83.99	2387	455	99.48	193	1	460	745	450	734	285
KP_F020-KP_R035	Universal	C4-C5	93.26	208112	15031	95.45	734	35	517	804	526	813	287	V3-C5	83.85	2383	459	98.97	192	2	460	748	450	737	288
KP_F020-KP_R038	Universal	C4-C5	93.03	207598	15545	95.32	733	36	517	805	526	814	288	V3-C5	83.74	2380	462	97.94	190	4	460	749	450	738	289
KP_F020-OP_R010	Universal	C4-C5	93.04	207603	15540	95.32	733	36	517	805	526	814	288	V3-C5	83.74	2380	462	97.94	190	4	460	749	450	738	289
KP_F020-OP_R014	Universal	C4-C5	93.04	207607	15536	95.32	733	36	517	805	526	814	288	V3-C5	83.85	2383	459	98.45	191	3	460	749	450	738	289
KP_F020-OP_R020	Universal	C4-C5	93.36	208320	14823	95.45	734	35	517	804	526	813	287	V3-C5	83.85	2383	459	98.97	192	2	460	748	450	737	288
KP_F020-OP_R032	Universal	C4-C5	93.51	208664	14479	95.19	732	37	517	801	526	810	284	V3-C5	79.66	2264	578	89.69	174	20	457	742	450	734	285
KP_F020-OP_R036	Universal	C4-C5	93.07	207688	15455	95.32	733	36	517	805	526	814	288	V3-C5	83.85	2383	459	98.45	191	3	460	749	450	738	289
KP_F020-OP_R048	Universal	C4-C5	92.95	207403	15740	95.32	733	36	517	805	526	814	288	V3-C5	83.85	2383	459	98.45	191	3	460	749	450	738	289
KP_F020-OP_R070	Universal	C4-C5	93.3	208189	14954	95.84	737	32	517	804	526	813	287	V3-C5	83.85	2383	459	98.97	192	2	460	748	450	737	288
KP_F059-OP_R073	Universal	C5-C6	96.09	214418	8725	98.18	755	14	782	892	792	903	110	C5-V5	81.84	2326	516	92.27	179	15	728	842	716	830	114
OP_F009-OP_R073	Universal	C5-C6	92.71	206883	16260	96.23	740	29	783	893	792	903	110	C5-V5	77.55	2204	638	82.99	161	33	724	838	716	830	114
OP_F014-KP_R031	Universal	C4-C5	93.24	208065	15078	95.97	738	31	513	801	522	810	288	V3-C5	76	2160	682	88.66	172	22	455	744	446	734	289
OP_F014-KP_R032	Universal	C4-C5	93.21	207992	15151	95.58	735	34	513	801	522	810	288	V3-C5	76.11	2163	679	89.18	173	21	455	744	446	734	289
OP_F014-KP_R035	Universal	C4-C5	92.95	207402	15741	95.45	734	35	513	804	522	813	291	V3-C5	75.97	2159	683	88.66	172	22	455	747	446	737	292
OP_F014-KP_R038	Universal	C4-C5	92.72	206892	16251	95.32	733	36	513	805	522	814	292	V3-C5	75.86	2156	686	87.63	170	24	455	748	446	738	293
OP_F014-OP_R010	Universal	C4-C5	92.72	206897	16246	95.32	733	36	513	805	522	814	292	V3-C5	75.86	2156	686	87.63	170	24	455	748	446	738	293
OP_F014-OP_R014	Universal	C4-C5	92.72	206901	16242	95.32	733	36	513	805	522	814	292	V3-C5	75.97	2159	683	88.14	171	23	455	748	446	738	293
OP_F014-OP_R020	Universal	C4-C5	93.04	207609	15534	95.45	734	35	513	804	522	813	291	V3-C5	75.97	2159	683	88.66	172	22	455	747	446	737	292
OP_F014-OP_R032	Universal	C4-C5	93.19	207951	15192	95.19	732	37	513	801	522	810	288	V3-C5	71.78	2040	802	79.38	154	40	452	741	446	734	289
OP_F014-OP_R036	Universal	C4-C5	92.76	206982	16161	95.32	733	36	513	805	522	814	292	V3-C5	75.97	2159	683	88.14	171	23	455	748	446	738	293
OP_F014-OP_R048	Universal	C4-C5	92.63	206698	16445	95.32	733	36	513	805	522	814	292	V3-C5	75.97	2159	683	88.14	171	23	455	748	446	738	293
OP_F014-OP_R070	Universal	C4-C5	92.98	207479	15664	95.84	737	32	513	804	522	813	291	V3-C5	75.97	2159	683	88.66	172	22	455	747	446	737	292
OP_F043-KP_R002	Universal	C3-C4	93.7	209091	14052	92.46	711	58	343	532	348	541	188	C3-V3	78.25	2224	618	81.96	159	35	318	471	314	465	153
OP_F043-OP_R102	Universal	C3-C4	93.63	208930	14213	92.46	711	58	343	535	348	544	191	C3-V3	78.18	2222	620	81.44	158	36	318	474	314	468	156
OP_F066-OP_R073	Universal	C5-C6	96.58	215520	7623	98.31	756	13	782	892	792	903	110	C5-V5	82.3	2339	503	92.78	180	14	728	842	716	830	114
OP_F100-KP_R031	Universal	C4-C5	93.34	208288	14855	95.97	738	31	513	801	522	810	288	V3-C5	76.25	2167	675	88.66	172	22	455	744	446	734	289
OP_F100-KP_R032	Universal	C4-C5	93.31	208215	14928	95.58	735	34	513	801	522	810	288	V3-C5	76.35	2170	672	89.18	173	21	455	744	446	734	289
OP_F100-KP_R035	Universal	C4-C5	93.04	207624	15519	95.45	734	35	513	804	522	813	291	V3-C5	76.21	2166	676	88.66	172	22	455	747	446	737	292
OP_F100-KP_R038	Universal	C4-C5	92.82	207113	16030	95.32	733	36	513	805	522	814	292	V3-C5	76.11	2163	679	87.63	170	24	455	748	446	738	293
OP_F100-OP_R010	Universal	C4-C5	92.82	207118	16025	95.32	733	36	513	805	522	814	292	V3-C5	76.11	2163	679	87.63	170	24	455	748	446	738	293
OP_F100-OP_R014	Universal	C4-C5	92.82	207122	16021	95.32	733	36	513	805	522	814	292	V3-C5	76.21	2166	676	88.14	171	23	455	748	446	738	293
OP_F100-OP_R020	Universal	C4-C5	93.14	207831	15312	95.45	734	35	513	804	522	813	291	V3-C5	76.21	2166	676	88.66	172	22	455	747	446	737	292
OP_F100-OP_R032	Universal	C4-C5	93.29	208174	14969	95.19	732	37	513	801	522	810	288	V3-C5	72.03	2047	795	79.38	154	40	452	741	446	734	289
OP_F100-OP_R036	Universal	C4-C5	92.86	207203	15940	95.32	733	36	513	805	522	814	292	V3-C5	76.21	2166	676	88.14	171	23	455	748	446	738	293
OP_F100-OP_R048	Universal	C4-C5	92.73	206919	16224	95.32	733	36	513	805	522	814	292	V3-C5	76.21	2166	676	88.14	171	23	455	748	446	738	293
OP_F100-OP_R070	Universal	C4-C5	93.08	207701	15442	95.84	737	32	513	804	522	813	291	V3-C5	76.21	2166	676	88.66	172	22	455	747	446	737	292
OP_F114-KP_R002	Universal	C3-C4	93.7	209093	14050	92.46	711	58	343	532	348	541	188	C3-V3	84.27	2395	447	98.97	192	2	322	474	314	465	152
OP_F114-OP_R102	Universal	C3-C4	93.63	208932	14211	92.46	711	58	343	535	348	544	191	C3-V3	84.2	2393	449	98.45	191	3	322	477	314	468	155

## Sheet: 301-600bp
		BACTERIA												ARCHAEA
			VARIANT LEVEL			SPECIES LEVEL									VARIANT LEVEL			SPECIES LEVEL
PP_identifier	PP_type	16S_gene_region	Coverage (%)	Covered	Non_covered	Coverage (%)	Covered	Non_covered	PP_Mean_IP	PP_Mean_EP	PP_Mode_IP	PP_Mode_EP	PP_Mean_length	16S_gene_region	Coverage (%)	Covered	Non_covered	Coverage (%)	Covered	Non_covered	PP_Mean_IP	PP_Mean_EP	PP_Mode_IP	PP_Mode_EP	PP_Mean_length
KP_F020-KP_R039	Bacteria	C4-C6	72.86	162593	60550	84.01	646	123	518	926	526	935	408	V3-C6	0.14	4	2838	1.03	2	192	455	868	459	871	412
KP_F020-KP_R040	Bacteria	C4-C6	88.39	197234	25909	89.6	689	80	517	925	526	935	408	-	0	0	2842	0	0	194	0	0	0	0	0
KP_F020-KP_R041	Bacteria	C4-C6	88.58	197663	25480	89.6	689	80	517	924	526	934	407	-	0	0	2842	0	0	194	0	0	0	0	0
KP_F020-KP_R046	Bacteria	C4-C7	88.06	196509	26634	88.82	683	86	516	1062	526	1075	546	V3-C6	0.14	4	2838	2.06	4	190	450	994	450	994	544
KP_F020-KP_R050	Bacteria	C4-C7	90.14	201142	22001	91.94	707	62	516	1062	526	1075	546	V3-C6	26.74	760	2082	11.34	22	172	450	994	450	994	544
KP_F020-KP_R053	Bacteria	C4-C7	92.96	207438	15705	93.11	716	53	517	1076	526	1088	559	V3-V6	0.6	17	2825	3.61	7	187	682	1285	461	1018	603
KP_F020-KP_R054	Bacteria	C4-C7	84.35	188229	34914	90.12	693	76	517	1078	526	1090	561	V3-V6	0.6	17	2825	3.61	7	187	682	1287	461	1020	605
KP_F020-KP_R055	Bacteria	C4-C7	84.17	187820	35323	90.12	693	76	517	1079	526	1091	562	V3-V6	0.6	17	2825	3.61	7	187	682	1288	461	1021	606
KP_F020-KP_R056	Bacteria	C4-V7	88.61	197722	25421	80.62	620	149	517	1113	526	1125	597	-	0	0	2842	0	0	194	0	0	0	0	0
KP_F020-KP_R057	Bacteria	C4-V7	85.43	190642	32501	79.58	612	157	517	1113	526	1125	597	-	0	0	2842	0	0	194	0	0	0	0	0
KP_F020-OP_R026	Bacteria	C4-V7	85.08	189855	33288	78.02	600	169	517	1113	526	1125	597	-	0	0	2842	0	0	194	0	0	0	0	0
KP_F020-OP_R030	Bacteria	C4-C7	93.2	207981	15162	95.58	735	34	517	1079	526	1091	562	V3-V6	0.6	17	2825	3.61	7	187	682	1288	461	1021	606
KP_F020-OP_R050	Bacteria	C4-C6	88.45	197382	25761	90.51	696	73	517	925	526	935	408	V3-C6	0.14	4	2838	1.03	2	192	455	868	459	871	412
KP_F020-OP_R052	Bacteria	C4-C6	88.73	197989	25154	90.51	696	73	517	925	526	935	408	V3-C6	0.14	4	2838	1.03	2	192	455	868	459	871	412
KP_F020-OP_R067	Bacteria	C4-C6	88.89	198349	24794	90.51	696	73	517	925	526	935	408	V3-C6	0.14	4	2838	1.03	2	192	455	868	459	871	412
KP_F020-OP_R089	Bacteria	C4-C6	76.93	171655	51488	86.48	665	104	517	925	526	935	408	V3-C6	0.14	4	2838	1.03	2	192	455	868	459	871	412
KP_F020-OP_R108	Bacteria	C4-C6	72.8	162449	60694	83.09	639	130	518	926	526	935	408	-	0	0	2842	0	0	194	0	0	0	0	0
KP_F020-OP_R143	Bacteria	C4-C6	72.97	162827	60316	83.09	639	130	518	925	526	934	407	-	0	0	2842	0	0	194	0	0	0	0	0
KP_F020-OP_UI005	Bacteria	C4-C6	72.89	162645	60498	83.09	639	130	518	926	526	935	408	-	0	0	2842	0	0	194	0	0	0	0	0
KP_F020-OP_UI009	Bacteria	C4-C7	87.36	194942	28201	87.52	673	96	516	1073	526	1085	556	-	0	0	2842	0	0	194	0	0	0	0	0
KP_F032-KP_R002	Bacteria	C1-C4	13.15	29351	193792	73.21	563	206	8	535	8	534	527	-	0	0	2842	0	0	194	0	0	0	0	0
KP_F032-KP_R018	Bacteria	C1-C3	13.21	29481	193662	72.82	560	209	8	360	8	357	352	-	0	0	2842	0	0	194	0	0	0	0	0
KP_F032-KP_R020	Bacteria	C1-C3	13.26	29592	193551	74.12	570	199	8	361	8	358	353	-	0	0	2842	0	0	194	0	0	0	0	0
KP_F032-KP_R021	Bacteria	C1-C4	13.13	29300	193843	73.08	562	207	8	535	8	534	527	-	0	0	2842	0	0	194	0	0	0	0	0
KP_F032-KP_R022	Bacteria	C1-C4	13.02	29044	194099	69.31	533	236	8	536	8	535	528	-	0	0	2842	0	0	194	0	0	0	0	0
KP_F032-KP_R023	Bacteria	C1-C4	13.02	29055	194088	69.31	533	236	8	536	8	535	528	-	0	0	2842	0	0	194	0	0	0	0	0
KP_F032-KP_R025	Bacteria	C1-C4	13.02	29059	194084	69.57	535	234	8	536	8	535	528	-	0	0	2842	0	0	194	0	0	0	0	0
KP_F032-KP_R070	Bacteria	C1-C4	13.02	29043	194100	69.31	533	236	8	538	8	537	530	-	0	0	2842	0	0	194	0	0	0	0	0
KP_F032-KP_R071	Bacteria	C1-C4	13.26	29578	193565	75.55	581	188	8	533	8	532	525	-	0	0	2842	0	0	194	0	0	0	0	0
KP_F032-OP_R019	Bacteria	C1-C4	12.2	27226	195917	70.74	544	225	8	536	8	534	528	-	0	0	2842	0	0	194	0	0	0	0	0
KP_F032-OP_R028	Bacteria	C1-C3	13.11	29247	193896	69.05	531	238	8	365	8	362	357	-	0	0	2842	0	0	194	0	0	0	0	0
KP_F032-OP_R038	Bacteria	C1-C4	13.13	29308	193835	73.08	562	207	8	534	8	533	526	-	0	0	2842	0	0	194	0	0	0	0	0
KP_F032-OP_R040	Bacteria	C1-C4	13.24	29543	193600	75.42	580	189	8	533	8	532	525	-	0	0	2842	0	0	194	0	0	0	0	0
KP_F032-OP_R043	Bacteria	C1-C4	13.28	29632	193511	75.68	582	187	8	532	8	531	524	-	0	0	2842	0	0	194	0	0	0	0	0
KP_F032-OP_R045	Bacteria	C1-C4	13.03	29071	194072	69.31	533	236	8	536	8	535	528	-	0	0	2842	0	0	194	0	0	0	0	0
KP_F032-OP_R047	Bacteria	C1-C4	12.2	27218	195925	70.74	544	225	8	536	8	534	528	-	0	0	2842	0	0	194	0	0	0	0	0
KP_F032-OP_R051	Bacteria	C1-C4	12.99	28994	194149	69.18	532	237	8	538	8	537	530	-	0	0	2842	0	0	194	0	0	0	0	0
KP_F032-OP_R054	Bacteria	C1-C3	13.22	29505	193638	72.82	560	209	8	359	8	356	351	-	0	0	2842	0	0	194	0	0	0	0	0
KP_F032-OP_R100	Bacteria	C1-C4	13	29006	194137	69.18	532	237	8	537	8	536	529	-	0	0	2842	0	0	194	0	0	0	0	0
KP_F032-OP_R102	Bacteria	C1-C4	13.15	29334	193809	73.21	563	206	8	538	8	537	530	-	0	0	2842	0	0	194	0	0	0	0	0
KP_F032-OP_R115	Bacteria	C1-C4	13.01	29035	194108	69.31	533	236	8	538	8	537	530	-	0	0	2842	0	0	194	0	0	0	0	0
KP_F032-OP_R116	Bacteria	C1-C3	13.22	29508	193635	72.82	560	209	8	359	8	356	351	-	0	0	2842	0	0	194	0	0	0	0	0
KP_F032-OP_R146	Bacteria	C1-C4	13.25	29570	193573	75.55	581	188	8	533	8	532	525	-	0	0	2842	0	0	194	0	0	0	0	0
KP_F033-KP_R002	Bacteria	C1-C4	13.31	29692	193451	73.47	565	204	8	535	8	534	527	-	0	0	2842	0	0	194	0	0	0	0	0
KP_F033-KP_R018	Bacteria	C1-C3	13.36	29819	193324	73.08	562	207	8	360	8	357	352	-	0	0	2842	0	0	194	0	0	0	0	0
KP_F033-KP_R020	Bacteria	C1-C3	13.41	29931	193212	74.38	572	197	8	361	8	358	353	-	0	0	2842	0	0	194	0	0	0	0	0
KP_F033-KP_R021	Bacteria	C1-C4	13.28	29641	193502	73.34	564	205	8	535	8	534	527	-	0	0	2842	0	0	194	0	0	0	0	0
KP_F033-KP_R022	Bacteria	C1-C4	13.17	29385	193758	69.57	535	234	8	536	8	535	528	-	0	0	2842	0	0	194	0	0	0	0	0
KP_F033-KP_R023	Bacteria	C1-C4	13.17	29396	193747	69.57	535	234	8	536	8	535	528	-	0	0	2842	0	0	194	0	0	0	0	0
KP_F033-KP_R025	Bacteria	C1-C4	13.18	29400	193743	69.83	537	232	8	536	8	535	528	-	0	0	2842	0	0	194	0	0	0	0	0
KP_F033-KP_R070	Bacteria	C1-C4	13.17	29383	193760	69.57	535	234	8	538	8	537	530	-	0	0	2842	0	0	194	0	0	0	0	0
KP_F033-KP_R071	Bacteria	C1-C4	13.41	29919	193224	75.81	583	186	8	533	8	532	525	-	0	0	2842	0	0	194	0	0	0	0	0
KP_F033-OP_R019	Bacteria	C1-C4	12.34	27525	195618	71	546	223	8	535	8	534	528	-	0	0	2842	0	0	194	0	0	0	0	0
KP_F033-OP_R028	Bacteria	C1-C3	13.26	29586	193557	69.31	533	236	8	365	8	362	357	-	0	0	2842	0	0	194	0	0	0	0	0
KP_F033-OP_R038	Bacteria	C1-C4	13.29	29649	193494	73.34	564	205	8	534	8	533	526	-	0	0	2842	0	0	194	0	0	0	0	0
KP_F033-OP_R040	Bacteria	C1-C4	13.39	29884	193259	75.68	582	187	8	533	8	532	525	-	0	0	2842	0	0	194	0	0	0	0	0
KP_F033-OP_R043	Bacteria	C1-C4	13.43	29973	193170	75.94	584	185	8	532	8	531	524	-	0	0	2842	0	0	194	0	0	0	0	0
KP_F033-OP_R045	Bacteria	C1-C4	13.18	29412	193731	69.57	535	234	8	536	8	535	528	-	0	0	2842	0	0	194	0	0	0	0	0
KP_F033-OP_R047	Bacteria	C1-C4	12.33	27517	195626	71	546	223	8	535	8	534	528	-	0	0	2842	0	0	194	0	0	0	0	0
KP_F033-OP_R051	Bacteria	C1-C4	13.15	29334	193809	69.44	534	235	8	538	8	537	530	-	0	0	2842	0	0	194	0	0	0	0	0
KP_F033-OP_R054	Bacteria	C1-C3	13.37	29844	193299	73.08	562	207	8	359	8	356	351	-	0	0	2842	0	0	194	0	0	0	0	0
KP_F033-OP_R100	Bacteria	C1-C4	13.15	29347	193796	69.44	534	235	8	537	8	536	529	-	0	0	2842	0	0	194	0	0	0	0	0
KP_F033-OP_R102	Bacteria	C1-C4	13.3	29674	193469	73.47	565	204	8	538	8	537	530	-	0	0	2842	0	0	194	0	0	0	0	0
KP_F033-OP_R115	Bacteria	C1-C4	13.16	29375	193768	69.57	535	234	8	538	8	537	530	-	0	0	2842	0	0	194	0	0	0	0	0
KP_F033-OP_R116	Bacteria	C1-C3	13.38	29847	193296	73.08	562	207	8	359	8	356	351	-	0	0	2842	0	0	194	0	0	0	0	0
KP_F033-OP_R146	Bacteria	C1-C4	13.4	29911	193232	75.81	583	186	8	533	8	532	525	-	0	0	2842	0	0	194	0	0	0	0	0
KP_F035-KP_R002	Bacteria	C1-C4	10.34	23081	200062	72.3	556	213	9	535	9	541	527	-	0	0	2842	0	0	194	0	0	0	0	0
KP_F035-KP_R018	Bacteria	C1-C3	10.41	23221	199922	72.17	555	214	9	361	9	363	352	-	0	0	2842	0	0	194	0	0	0	0	0
KP_F035-KP_R020	Bacteria	C1-C3	10.46	23336	199807	73.6	566	203	9	362	9	364	353	-	0	0	2842	0	0	194	0	0	0	0	0
KP_F035-KP_R021	Bacteria	C1-C4	10.32	23032	200111	72.17	555	214	9	535	9	541	527	-	0	0	2842	0	0	194	0	0	0	0	0
KP_F035-KP_R022	Bacteria	C1-C4	10.21	22787	200356	68.79	529	240	9	536	9	542	528	-	0	0	2842	0	0	194	0	0	0	0	0
KP_F035-KP_R023	Bacteria	C1-C4	10.21	22793	200350	68.79	529	240	9	536	9	542	528	-	0	0	2842	0	0	194	0	0	0	0	0
KP_F035-KP_R025	Bacteria	C1-C4	10.22	22802	200341	69.05	531	238	9	536	9	542	528	-	0	0	2842	0	0	194	0	0	0	0	0
KP_F035-KP_R070	Bacteria	C1-C4	10.21	22790	200353	68.66	528	241	9	538	9	544	530	-	0	0	2842	0	0	194	0	0	0	0	0
KP_F035-KP_R071	Bacteria	C1-C4	10.45	23323	199820	74.9	576	193	9	533	9	539	525	-	0	0	2842	0	0	194	0	0	0	0	0
KP_F035-OP_R019	Bacteria	C1-C4	9.78	21833	201310	69.96	538	231	9	536	9	541	527	-	0	0	2842	0	0	194	0	0	0	0	0
KP_F035-OP_R028	Bacteria	C1-C3	10.31	23003	200140	69.05	531	238	9	366	9	368	357	-	0	0	2842	0	0	194	0	0	0	0	0
KP_F035-OP_R038	Bacteria	C1-C4	10.33	23040	200103	72.17	555	214	9	534	9	540	526	-	0	0	2842	0	0	194	0	0	0	0	0
KP_F035-OP_R040	Bacteria	C1-C4	10.44	23286	199857	74.77	575	194	9	533	9	539	525	-	0	0	2842	0	0	194	0	0	0	0	0
KP_F035-OP_R043	Bacteria	C1-C4	10.48	23376	199767	75.03	577	192	9	532	9	538	524	-	0	0	2842	0	0	194	0	0	0	0	0
KP_F035-OP_R045	Bacteria	C1-C4	10.22	22811	200332	68.79	529	240	9	536	9	542	528	-	0	0	2842	0	0	194	0	0	0	0	0
KP_F035-OP_R047	Bacteria	C1-C4	9.78	21826	201317	69.96	538	231	9	536	9	541	527	-	0	0	2842	0	0	194	0	0	0	0	0
KP_F035-OP_R051	Bacteria	C1-C4	10.19	22744	200399	68.53	527	242	9	538	9	544	530	-	0	0	2842	0	0	194	0	0	0	0	0
KP_F035-OP_R054	Bacteria	C1-C3	10.42	23241	199902	72.17	555	214	9	360	9	362	351	-	0	0	2842	0	0	194	0	0	0	0	0
KP_F035-OP_R100	Bacteria	C1-C4	10.2	22758	200385	68.66	528	241	9	537	9	543	529	-	0	0	2842	0	0	194	0	0	0	0	0
KP_F035-OP_R102	Bacteria	C1-C4	10.34	23069	200074	72.17	555	214	9	538	9	544	530	-	0	0	2842	0	0	194	0	0	0	0	0
KP_F035-OP_R115	Bacteria	C1-C4	10.21	22783	200360	68.66	528	241	9	538	9	544	530	-	0	0	2842	0	0	194	0	0	0	0	0
KP_F035-OP_R116	Bacteria	C1-C3	10.42	23241	199902	72.17	555	214	9	360	9	362	351	-	0	0	2842	0	0	194	0	0	0	0	0
KP_F035-OP_R146	Bacteria	C1-C4	10.45	23316	199827	74.9	576	193	9	533	9	539	525	-	0	0	2842	0	0	194	0	0	0	0	0
KP_F036-KP_R002	Bacteria	C1-C4	18.63	41575	181568	77.37	595	174	9	534	9	534	525	-	0	0	2842	0	0	194	0	0	0	0	0
KP_F036-KP_R018	Bacteria	C1-C3	18.76	41867	181276	77.37	595	174	9	360	9	357	351	-	0	0	2842	0	0	194	0	0	0	0	0
KP_F036-KP_R020	Bacteria	C1-C3	18.86	42096	181047	78.8	606	163	9	361	9	358	352	-	0	0	2842	0	0	194	0	0	0	0	0
KP_F036-KP_R021	Bacteria	C1-C4	18.59	41472	181671	77.24	594	175	9	534	9	534	525	-	0	0	2842	0	0	194	0	0	0	0	0
KP_F036-KP_R022	Bacteria	C1-C4	18.38	41008	182135	73.6	566	203	9	535	9	535	526	-	0	0	2842	0	0	194	0	0	0	0	0
KP_F036-KP_R023	Bacteria	C1-C4	18.39	41029	182114	73.6	566	203	9	535	9	535	526	-	0	0	2842	0	0	194	0	0	0	0	0
KP_F036-KP_R025	Bacteria	C1-C4	18.39	41040	182103	73.86	568	201	9	535	9	535	526	-	0	0	2842	0	0	194	0	0	0	0	0
KP_F036-KP_R070	Bacteria	C1-C4	18.38	41016	182127	73.47	565	204	9	537	9	537	528	-	0	0	2842	0	0	194	0	0	0	0	0
KP_F036-KP_R071	Bacteria	C1-C4	18.89	42144	180999	80.23	617	152	9	532	9	532	523	-	0	0	2842	0	0	194	0	0	0	0	0
KP_F036-OP_R019	Bacteria	C1-C4	17.6	39284	183859	75.03	577	192	9	534	9	534	525	-	0	0	2842	0	0	194	0	0	0	0	0
KP_F036-OP_R028	Bacteria	C1-C3	18.57	41428	181715	73.73	567	202	9	365	9	362	356	-	0	0	2842	0	0	194	0	0	0	0	0
KP_F036-OP_R038	Bacteria	C1-C4	18.59	41486	181657	77.24	594	175	9	533	9	533	524	-	0	0	2842	0	0	194	0	0	0	0	0
KP_F036-OP_R040	Bacteria	C1-C4	18.86	42077	181066	80.1	616	153	9	532	9	532	523	-	0	0	2842	0	0	194	0	0	0	0	0
KP_F036-OP_R043	Bacteria	C1-C4	18.9	42184	180959	80.36	618	151	9	531	9	531	522	-	0	0	2842	0	0	194	0	0	0	0	0
KP_F036-OP_R045	Bacteria	C1-C4	18.4	41057	182086	73.6	566	203	9	535	9	535	526	-	0	0	2842	0	0	194	0	0	0	0	0
KP_F036-OP_R047	Bacteria	C1-C4	17.6	39276	183867	75.03	577	192	9	534	9	534	525	-	0	0	2842	0	0	194	0	0	0	0	0
KP_F036-OP_R051	Bacteria	C1-C4	18.34	40919	182224	73.34	564	205	9	537	9	537	528	-	0	0	2842	0	0	194	0	0	0	0	0
KP_F036-OP_R054	Bacteria	C1-C3	18.78	41908	181235	77.37	595	174	9	359	9	356	350	-	0	0	2842	0	0	194	0	0	0	0	0
KP_F036-OP_R100	Bacteria	C1-C4	18.35	40946	182197	73.47	565	204	9	536	9	536	527	-	0	0	2842	0	0	194	0	0	0	0	0
KP_F036-OP_R102	Bacteria	C1-C4	18.62	41555	181588	77.24	594	175	9	537	9	537	528	-	0	0	2842	0	0	194	0	0	0	0	0
KP_F036-OP_R115	Bacteria	C1-C4	18.38	41008	182135	73.47	565	204	9	537	9	537	528	-	0	0	2842	0	0	194	0	0	0	0	0
KP_F036-OP_R116	Bacteria	C1-C3	18.78	41911	181232	77.37	595	174	9	359	9	356	350	-	0	0	2842	0	0	194	0	0	0	0	0
KP_F036-OP_R146	Bacteria	C1-C4	18.88	42136	181007	80.23	617	152	9	532	9	532	523	-	0	0	2842	0	0	194	0	0	0	0	0
KP_F037-KP_R002	Bacteria	C1-C4	20.48	45692	177451	73.6	566	203	20	536	20	534	516	-	0	0	2842	0	0	194	0	0	0	0	0
KP_F037-KP_R018	Bacteria	C1-C3	20.56	45871	177272	73.34	564	205	20	360	20	357	341	-	0	0	2842	0	0	194	0	0	0	0	0
KP_F037-KP_R020	Bacteria	C1-C3	20.64	46058	177085	74.38	572	197	20	361	20	358	342	-	0	0	2842	0	0	194	0	0	0	0	0
KP_F037-KP_R021	Bacteria	C1-C4	20.43	45578	177565	73.6	566	203	20	536	20	534	516	-	0	0	2842	0	0	194	0	0	0	0	0
KP_F037-KP_R022	Bacteria	C1-C4	20.2	45073	178070	69.96	538	231	20	537	20	535	517	-	0	0	2842	0	0	194	0	0	0	0	0
KP_F037-KP_R023	Bacteria	C1-C4	20.21	45097	178046	69.96	538	231	20	537	20	535	517	-	0	0	2842	0	0	194	0	0	0	0	0
KP_F037-KP_R025	Bacteria	C1-C4	20.21	45103	178040	70.09	539	230	20	537	20	535	517	-	0	0	2842	0	0	194	0	0	0	0	0
KP_F037-KP_R070	Bacteria	C1-C4	20.2	45080	178063	69.96	538	231	20	539	20	537	519	-	0	0	2842	0	0	194	0	0	0	0	0
KP_F037-KP_R071	Bacteria	C1-C4	20.71	46218	176925	75.81	583	186	20	533	20	532	513	-	0	0	2842	0	0	194	0	0	0	0	0
KP_F037-OP_R019	Bacteria	C1-C4	19.3	43070	180073	71.52	550	219	20	536	20	534	516	-	0	0	2842	0	0	194	0	0	0	0	0
KP_F037-OP_R028	Bacteria	C1-C3	20.34	45398	177745	69.44	534	235	20	365	20	362	346	-	0	0	2842	0	0	194	0	0	0	0	0
KP_F037-OP_R038	Bacteria	C1-C4	20.43	45592	177551	73.6	566	203	20	535	20	533	515	-	0	0	2842	0	0	194	0	0	0	0	0
KP_F037-OP_R040	Bacteria	C1-C4	20.68	46143	177000	75.81	583	186	20	533	20	532	513	-	0	0	2842	0	0	194	0	0	0	0	0
KP_F037-OP_R043	Bacteria	C1-C4	20.7	46199	176944	75.81	583	186	20	532	20	531	512	-	0	0	2842	0	0	194	0	0	0	0	0
KP_F037-OP_R045	Bacteria	C1-C4	20.22	45124	178019	69.96	538	231	20	537	20	535	517	-	0	0	2842	0	0	194	0	0	0	0	0
KP_F037-OP_R047	Bacteria	C1-C4	19.3	43062	180081	71.52	550	219	20	536	20	534	516	-	0	0	2842	0	0	194	0	0	0	0	0
KP_F037-OP_R051	Bacteria	C1-C4	20.15	44970	178173	69.96	538	231	20	539	20	537	519	-	0	0	2842	0	0	194	0	0	0	0	0
KP_F037-OP_R054	Bacteria	C1-C3	20.58	45919	177224	73.34	564	205	20	359	20	356	340	-	0	0	2842	0	0	194	0	0	0	0	0
KP_F037-OP_R100	Bacteria	C1-C4	20.17	45005	178138	69.96	538	231	20	538	20	536	518	-	0	0	2842	0	0	194	0	0	0	0	0
KP_F037-OP_R102	Bacteria	C1-C4	20.46	45665	177478	73.6	566	203	20	539	20	537	519	-	0	0	2842	0	0	194	0	0	0	0	0
KP_F037-OP_R115	Bacteria	C1-C4	20.2	45072	178071	69.96	538	231	20	539	20	537	519	-	0	0	2842	0	0	194	0	0	0	0	0
KP_F037-OP_R116	Bacteria	C1-C3	20.58	45922	177221	73.34	564	205	20	359	20	356	340	-	0	0	2842	0	0	194	0	0	0	0	0
KP_F037-OP_R146	Bacteria	C1-C4	20.71	46210	176933	75.81	583	186	20	533	20	532	513	-	0	0	2842	0	0	194	0	0	0	0	0
KP_F044-KP_R029	Bacteria	C3-C5	88.91	198390	24753	83.75	644	125	340	804	345	814	464	-	0	0	2842	0	0	194	0	0	0	0	0
KP_F044-KP_R030	Bacteria	C3-C5	90.24	201355	21788	85.05	654	115	340	796	345	806	456	-	0	0	2842	0	0	194	0	0	0	0	0
KP_F044-KP_R031	Bacteria	C3-C5	96.34	214974	8169	95.71	736	33	340	800	332	810	460	-	0	0	2842	0	0	194	0	0	0	0	0
KP_F044-KP_R032	Bacteria	C3-C5	93.26	208115	15028	94.28	725	44	340	801	345	810	460	-	0	0	2842	0	0	194	0	0	0	0	0
KP_F044-KP_R033	Bacteria	C3-C5	89.92	200646	22497	84.4	649	120	340	801	345	811	461	-	0	0	2842	0	0	194	0	0	0	0	0
KP_F044-KP_R034	Bacteria	C3-C5	92.71	206886	16257	91.42	703	66	340	802	345	811	461	-	0	0	2842	0	0	194	0	0	0	0	0
KP_F044-KP_R035	Bacteria	C3-C5	93	207524	15619	94.15	724	45	340	804	345	813	463	-	0	0	2842	0	0	194	0	0	0	0	0
KP_F044-KP_R036	Bacteria	C3-C5	89.79	200368	22775	84.4	649	120	340	803	345	813	463	-	0	0	2842	0	0	194	0	0	0	0	0
KP_F044-KP_R037	Bacteria	C3-C5	89.48	199664	23479	84.27	648	121	340	804	345	814	464	-	0	0	2842	0	0	194	0	0	0	0	0
KP_F044-KP_R038	Bacteria	C3-C5	92.75	206975	16168	93.89	722	47	340	805	345	814	464	-	0	0	2842	0	0	194	0	0	0	0	0
KP_F044-KP_R039	Bacteria	C3-C6	75.32	168070	55073	81.79	629	140	342	925	345	935	583	-	0	0	2842	0	0	194	0	0	0	0	0
KP_F044-KP_R040	Bacteria	C3-C6	90.82	202668	20475	87.39	672	97	340	925	332	935	584	-	0	0	2842	0	0	194	0	0	0	0	0
KP_F044-KP_R041	Bacteria	C3-C6	91.02	203106	20037	87.39	672	97	340	924	332	934	583	-	0	0	2842	0	0	194	0	0	0	0	0
KP_F044-OP_R010	Bacteria	C3-C5	92.76	206980	16163	93.89	722	47	340	805	345	814	464	-	0	0	2842	0	0	194	0	0	0	0	0
KP_F044-OP_R014	Bacteria	C3-C5	92.76	206984	16159	93.89	722	47	340	805	345	814	464	-	0	0	2842	0	0	194	0	0	0	0	0
KP_F044-OP_R020	Bacteria	C3-C5	93.1	207738	15405	94.15	724	45	340	804	345	813	463	-	0	0	2842	0	0	194	0	0	0	0	0
KP_F044-OP_R032	Bacteria	C3-C5	93.25	208075	15068	93.89	722	47	340	801	345	810	460	-	0	0	2842	0	0	194	0	0	0	0	0
KP_F044-OP_R036	Bacteria	C3-C5	92.85	207179	15964	94.02	723	46	340	805	345	814	464	-	0	0	2842	0	0	194	0	0	0	0	0
KP_F044-OP_R048	Bacteria	C3-C5	92.66	206774	16369	93.89	722	47	340	805	345	814	464	-	0	0	2842	0	0	194	0	0	0	0	0
KP_F044-OP_R050	Bacteria	C3-C6	90.89	202820	20323	88.3	679	90	340	925	332	935	584	-	0	0	2842	0	0	194	0	0	0	0	0
KP_F044-OP_R052	Bacteria	C3-C6	91.17	203439	19704	88.3	679	90	340	925	332	935	584	-	0	0	2842	0	0	194	0	0	0	0	0
KP_F044-OP_R066	Bacteria	C3-C5	89.62	199988	23155	85.31	656	113	340	804	345	814	464	-	0	0	2842	0	0	194	0	0	0	0	0
KP_F044-OP_R067	Bacteria	C3-C6	91.33	203800	19343	88.3	679	90	340	925	332	935	584	-	0	0	2842	0	0	194	0	0	0	0	0
KP_F044-OP_R070	Bacteria	C3-C5	96.07	214370	8773	95.58	735	34	340	803	332	813	463	-	0	0	2842	0	0	194	0	0	0	0	0
KP_F044-OP_R073	Bacteria	C3-C6	95.68	213504	9639	94.8	729	40	340	892	332	903	552	-	0	0	2842	0	0	194	0	0	0	0	0
KP_F044-OP_R079	Bacteria	C3-C5	92.76	206996	16147	85.83	660	109	340	802	332	813	463	-	0	0	2842	0	0	194	0	0	0	0	0
KP_F044-OP_R086	Bacteria	C3-C5	89.47	199649	23494	84.01	646	123	340	800	345	810	460	-	0	0	2842	0	0	194	0	0	0	0	0
KP_F044-OP_R088	Bacteria	C3-C5	89.39	199466	23677	84.27	648	121	340	804	345	814	464	-	0	0	2842	0	0	194	0	0	0	0	0
KP_F044-OP_R089	Bacteria	C3-C6	79.37	177108	46035	84.14	647	122	342	925	345	935	583	-	0	0	2842	0	0	194	0	0	0	0	0
KP_F044-OP_R108	Bacteria	C3-C6	75.25	167922	55221	80.88	622	147	342	925	345	935	583	-	0	0	2842	0	0	194	0	0	0	0	0
KP_F044-OP_R119	Bacteria	C3-C5	95.47	213036	10107	92.59	712	57	340	804	332	814	464	-	0	0	2842	0	0	194	0	0	0	0	0
KP_F044-OP_R139	Bacteria	C3-C5	89.04	198679	24464	83.75	644	125	340	804	345	814	464	-	0	0	2842	0	0	194	0	0	0	0	0
KP_F044-OP_R143	Bacteria	C3-C6	75.43	168310	54833	80.88	622	147	342	924	345	934	582	-	0	0	2842	0	0	194	0	0	0	0	0
KP_F044-OP_UI005	Bacteria	C3-C6	75.34	168125	55018	80.88	622	147	342	925	345	935	583	-	0	0	2842	0	0	194	0	0	0	0	0
KP_F045-KP_R029	Bacteria	C3-C5	88.64	197800	25343	78.02	600	169	342	804	347	814	462	-	0	0	2842	0	0	194	0	0	0	0	0
KP_F045-KP_R030	Bacteria	C3-C5	89.97	200757	22386	79.32	610	159	342	796	347	806	454	-	0	0	2842	0	0	194	0	0	0	0	0
KP_F045-KP_R031	Bacteria	C3-C5	96.07	214373	8770	89.99	692	77	342	800	334	810	458	-	0	0	2842	0	0	194	0	0	0	0	0
KP_F045-KP_R032	Bacteria	C3-C5	93	207517	15626	88.56	681	88	342	801	347	810	458	-	0	0	2842	0	0	194	0	0	0	0	0
KP_F045-KP_R033	Bacteria	C3-C5	89.65	200050	23093	78.67	605	164	342	801	347	811	459	-	0	0	2842	0	0	194	0	0	0	0	0
KP_F045-KP_R034	Bacteria	C3-C5	92.45	206290	16853	85.7	659	110	342	802	347	811	459	-	0	0	2842	0	0	194	0	0	0	0	0
KP_F045-KP_R035	Bacteria	C3-C5	92.73	206929	16214	88.43	680	89	342	804	347	813	461	-	0	0	2842	0	0	194	0	0	0	0	0
KP_F045-KP_R036	Bacteria	C3-C5	89.53	199774	23369	78.67	605	164	342	803	347	813	461	-	0	0	2842	0	0	194	0	0	0	0	0
KP_F045-KP_R037	Bacteria	C3-C5	89.21	199070	24073	78.54	604	165	342	804	347	814	462	-	0	0	2842	0	0	194	0	0	0	0	0
KP_F045-KP_R038	Bacteria	C3-C5	92.49	206379	16764	88.17	678	91	342	805	347	814	462	-	0	0	2842	0	0	194	0	0	0	0	0
KP_F045-KP_R039	Bacteria	C3-C6	75.05	167461	55682	76.07	585	184	344	925	347	935	581	-	0	0	2842	0	0	194	0	0	0	0	0
KP_F045-KP_R040	Bacteria	C3-C6	90.55	202062	21081	81.66	628	141	342	925	334	935	582	-	0	0	2842	0	0	194	0	0	0	0	0
KP_F045-KP_R041	Bacteria	C3-C6	90.75	202501	20642	81.66	628	141	342	924	334	934	581	-	0	0	2842	0	0	194	0	0	0	0	0
KP_F045-OP_R010	Bacteria	C3-C5	92.49	206384	16759	88.17	678	91	343	805	347	814	462	-	0	0	2842	0	0	194	0	0	0	0	0
KP_F045-OP_R014	Bacteria	C3-C5	92.49	206388	16755	88.17	678	91	343	805	347	814	462	-	0	0	2842	0	0	194	0	0	0	0	0
KP_F045-OP_R020	Bacteria	C3-C5	92.83	207143	16000	88.43	680	89	342	804	347	813	461	-	0	0	2842	0	0	194	0	0	0	0	0
KP_F045-OP_R032	Bacteria	C3-C5	92.98	207477	15666	88.17	678	91	342	801	347	810	458	-	0	0	2842	0	0	194	0	0	0	0	0
KP_F045-OP_R036	Bacteria	C3-C5	92.58	206584	16559	88.3	679	90	342	805	347	814	462	-	0	0	2842	0	0	194	0	0	0	0	0
KP_F045-OP_R048	Bacteria	C3-C5	92.4	206178	16965	88.17	678	91	342	805	347	814	462	-	0	0	2842	0	0	194	0	0	0	0	0
KP_F045-OP_R050	Bacteria	C3-C6	90.62	202214	20929	82.57	635	134	342	925	334	935	582	-	0	0	2842	0	0	194	0	0	0	0	0
KP_F045-OP_R052	Bacteria	C3-C6	90.9	202834	20309	82.57	635	134	342	925	334	935	582	-	0	0	2842	0	0	194	0	0	0	0	0
KP_F045-OP_R066	Bacteria	C3-C5	89.36	199394	23749	79.58	612	157	342	804	347	814	462	-	0	0	2842	0	0	194	0	0	0	0	0
KP_F045-OP_R067	Bacteria	C3-C6	91.06	203193	19950	82.57	635	134	342	925	334	935	582	-	0	0	2842	0	0	194	0	0	0	0	0
KP_F045-OP_R070	Bacteria	C3-C5	95.8	213772	9371	89.86	691	78	342	803	334	813	461	-	0	0	2842	0	0	194	0	0	0	0	0
KP_F045-OP_R073	Bacteria	C3-C6	95.41	212895	10248	89.08	685	84	342	892	334	903	550	-	0	0	2842	0	0	194	0	0	0	0	0
KP_F045-OP_R079	Bacteria	C3-C5	92.5	206399	16744	80.1	616	153	342	802	334	813	461	-	0	0	2842	0	0	194	0	0	0	0	0
KP_F045-OP_R086	Bacteria	C3-C5	89.21	199056	24087	78.28	602	167	342	800	347	810	458	-	0	0	2842	0	0	194	0	0	0	0	0
KP_F045-OP_R088	Bacteria	C3-C5	89.12	198872	24271	78.54	604	165	342	804	347	814	462	-	0	0	2842	0	0	194	0	0	0	0	0
KP_F045-OP_R089	Bacteria	C3-C6	79.1	176504	46639	78.41	603	166	344	925	347	935	581	-	0	0	2842	0	0	194	0	0	0	0	0
KP_F045-OP_R108	Bacteria	C3-C6	74.98	167313	55830	75.16	578	191	344	925	347	935	581	-	0	0	2842	0	0	194	0	0	0	0	0
KP_F045-OP_R119	Bacteria	C3-C5	95.2	212436	10707	86.87	668	101	342	804	334	814	462	-	0	0	2842	0	0	194	0	0	0	0	0
KP_F045-OP_R139	Bacteria	C3-C5	88.77	198086	25057	78.02	600	169	342	804	347	814	462	-	0	0	2842	0	0	194	0	0	0	0	0
KP_F045-OP_R143	Bacteria	C3-C6	75.15	167701	55442	75.16	578	191	344	924	347	934	580	-	0	0	2842	0	0	194	0	0	0	0	0
KP_F045-OP_UI005	Bacteria	C3-C6	75.07	167516	55627	75.16	578	191	344	925	347	935	581	-	0	0	2842	0	0	194	0	0	0	0	0
KP_F046-KP_R029	Bacteria	C3-C5	89.27	199198	23945	83.75	644	125	343	804	348	814	461	-	0	0	2842	0	0	194	0	0	0	0	0
KP_F046-KP_R030	Bacteria	C3-C5	90.6	202173	20970	85.05	654	115	343	796	348	806	453	-	0	0	2842	0	0	194	0	0	0	0	0
KP_F046-KP_R031	Bacteria	C3-C5	96.73	215844	7299	95.71	736	33	343	800	335	810	457	-	0	0	2842	0	0	194	0	0	0	0	0
KP_F046-KP_R032	Bacteria	C3-C5	93.64	208962	14181	94.28	725	44	343	801	348	810	457	-	0	0	2842	0	0	194	0	0	0	0	0
KP_F046-KP_R033	Bacteria	C3-C5	90.28	201464	21679	84.4	649	120	343	801	348	811	458	-	0	0	2842	0	0	194	0	0	0	0	0
KP_F046-KP_R034	Bacteria	C3-C5	93.09	207731	15412	91.42	703	66	343	802	348	811	458	-	0	0	2842	0	0	194	0	0	0	0	0
KP_F046-KP_R035	Bacteria	C3-C5	93.38	208371	14772	94.15	724	45	343	804	348	813	460	-	0	0	2842	0	0	194	0	0	0	0	0
KP_F046-KP_R036	Bacteria	C3-C5	90.16	201187	21956	84.4	649	120	343	803	348	813	460	-	0	0	2842	0	0	194	0	0	0	0	0
KP_F046-KP_R037	Bacteria	C3-C5	89.84	200480	22663	84.27	648	121	343	804	348	814	461	-	0	0	2842	0	0	194	0	0	0	0	0
KP_F046-KP_R038	Bacteria	C3-C5	93.13	207819	15324	93.89	722	47	343	805	348	814	461	-	0	0	2842	0	0	194	0	0	0	0	0
KP_F046-KP_R039	Bacteria	C3-C6	75.64	168790	54353	81.79	629	140	345	925	348	935	580	-	0	0	2842	0	0	194	0	0	0	0	0
KP_F046-KP_R040	Bacteria	C3-C6	91.19	203490	19653	87.39	672	97	343	925	335	935	581	-	0	0	2842	0	0	194	0	0	0	0	0
KP_F046-KP_R041	Bacteria	C3-C6	91.39	203930	19213	87.39	672	97	343	924	335	934	580	-	0	0	2842	0	0	194	0	0	0	0	0
KP_F046-OP_R010	Bacteria	C3-C5	93.13	207824	15319	93.89	722	47	343	805	348	814	461	-	0	0	2842	0	0	194	0	0	0	0	0
KP_F046-OP_R014	Bacteria	C3-C5	93.14	207828	15315	93.89	722	47	343	805	348	814	461	-	0	0	2842	0	0	194	0	0	0	0	0
KP_F046-OP_R020	Bacteria	C3-C5	93.48	208586	14557	94.15	724	45	343	804	348	813	460	-	0	0	2842	0	0	194	0	0	0	0	0
KP_F046-OP_R032	Bacteria	C3-C5	93.63	208922	14221	93.89	722	47	343	801	348	810	457	-	0	0	2842	0	0	194	0	0	0	0	0
KP_F046-OP_R036	Bacteria	C3-C5	93.22	208025	15118	94.02	723	46	343	805	348	814	461	-	0	0	2842	0	0	194	0	0	0	0	0
KP_F046-OP_R048	Bacteria	C3-C5	93.04	207617	15526	93.89	722	47	343	805	348	814	461	-	0	0	2842	0	0	194	0	0	0	0	0
KP_F046-OP_R050	Bacteria	C3-C6	91.26	203642	19501	88.3	679	90	343	925	335	935	581	-	0	0	2842	0	0	194	0	0	0	0	0
KP_F046-OP_R052	Bacteria	C3-C6	91.54	204265	18878	88.3	679	90	343	925	335	935	581	-	0	0	2842	0	0	194	0	0	0	0	0
KP_F046-OP_R066	Bacteria	C3-C5	89.99	200805	22338	85.31	656	113	343	804	348	814	461	-	0	0	2842	0	0	194	0	0	0	0	0
KP_F046-OP_R067	Bacteria	C3-C6	91.7	204629	18514	88.3	679	90	343	925	335	935	581	-	0	0	2842	0	0	194	0	0	0	0	0
KP_F046-OP_R070	Bacteria	C3-C5	96.46	215240	7903	95.58	735	34	343	803	335	813	460	-	0	0	2842	0	0	194	0	0	0	0	0
KP_F046-OP_R073	Bacteria	C3-C6	96.07	214376	8767	94.8	729	40	343	892	335	903	549	-	0	0	2842	0	0	194	0	0	0	0	0
KP_F046-OP_R079	Bacteria	C3-C5	93.14	207837	15306	85.83	660	109	343	802	335	813	460	-	0	0	2842	0	0	194	0	0	0	0	0
KP_F046-OP_R086	Bacteria	C3-C5	89.83	200460	22683	84.01	646	123	343	800	348	810	457	-	0	0	2842	0	0	194	0	0	0	0	0
KP_F046-OP_R088	Bacteria	C3-C5	89.75	200281	22862	84.27	648	121	343	804	348	814	461	-	0	0	2842	0	0	194	0	0	0	0	0
KP_F046-OP_R089	Bacteria	C3-C6	79.71	177868	45275	84.14	647	122	345	925	348	935	580	-	0	0	2842	0	0	194	0	0	0	0	0
KP_F046-OP_R108	Bacteria	C3-C6	75.58	168642	54501	80.88	622	147	345	925	348	935	580	-	0	0	2842	0	0	194	0	0	0	0	0
KP_F046-OP_R119	Bacteria	C3-C5	95.86	213903	9240	92.59	712	57	343	804	335	814	461	-	0	0	2842	0	0	194	0	0	0	0	0
KP_F046-OP_R139	Bacteria	C3-C5	89.4	199489	23654	83.75	644	125	343	804	348	814	461	-	0	0	2842	0	0	194	0	0	0	0	0
KP_F046-OP_R143	Bacteria	C3-C6	75.75	169030	54113	80.88	622	147	345	924	348	934	579	-	0	0	2842	0	0	194	0	0	0	0	0
KP_F046-OP_UI005	Bacteria	C3-C6	75.67	168847	54296	80.88	622	147	345	925	348	935	580	-	0	0	2842	0	0	194	0	0	0	0	0
KP_F047-KP_R029	Bacteria	C3-C5	89.47	199653	23490	83.75	644	125	343	804	348	814	461	-	0	0	2842	0	0	194	0	0	0	0	0
KP_F047-KP_R030	Bacteria	C3-C5	90.81	202632	20511	85.05	654	115	343	796	348	806	453	-	0	0	2842	0	0	194	0	0	0	0	0
KP_F047-KP_R031	Bacteria	C3-C5	96.95	216332	6811	95.71	736	33	343	800	335	810	457	-	0	0	2842	0	0	194	0	0	0	0	0
KP_F047-KP_R032	Bacteria	C3-C5	93.86	209439	13704	94.28	725	44	343	801	348	810	457	-	0	0	2842	0	0	194	0	0	0	0	0
KP_F047-KP_R033	Bacteria	C3-C5	90.49	201923	21220	84.4	649	120	343	801	348	811	458	-	0	0	2842	0	0	194	0	0	0	0	0
KP_F047-KP_R034	Bacteria	C3-C5	93.31	208207	14936	91.42	703	66	343	802	348	811	458	-	0	0	2842	0	0	194	0	0	0	0	0
KP_F047-KP_R035	Bacteria	C3-C5	93.59	208847	14296	94.15	724	45	343	804	348	813	460	-	0	0	2842	0	0	194	0	0	0	0	0
KP_F047-KP_R036	Bacteria	C3-C5	90.37	201645	21498	84.4	649	120	343	803	348	813	460	-	0	0	2842	0	0	194	0	0	0	0	0
KP_F047-KP_R037	Bacteria	C3-C5	90.05	200936	22207	84.27	648	121	343	804	348	814	461	-	0	0	2842	0	0	194	0	0	0	0	0
KP_F047-KP_R038	Bacteria	C3-C5	93.34	208293	14850	93.89	722	47	343	805	348	814	461	-	0	0	2842	0	0	194	0	0	0	0	0
KP_F047-KP_R039	Bacteria	C3-C6	75.82	169186	53957	81.92	630	139	345	925	348	935	580	-	0	0	2842	0	0	194	0	0	0	0	0
KP_F047-KP_R040	Bacteria	C3-C6	91.39	203941	19202	87.52	673	96	343	925	335	935	581	-	0	0	2842	0	0	194	0	0	0	0	0
KP_F047-KP_R041	Bacteria	C3-C6	91.59	204382	18761	87.52	673	96	343	924	335	934	580	-	0	0	2842	0	0	194	0	0	0	0	0
KP_F047-OP_R010	Bacteria	C3-C5	93.35	208298	14845	93.89	722	47	343	805	348	814	461	-	0	0	2842	0	0	194	0	0	0	0	0
KP_F047-OP_R014	Bacteria	C3-C5	93.35	208302	14841	93.89	722	47	343	805	348	814	461	-	0	0	2842	0	0	194	0	0	0	0	0
KP_F047-OP_R020	Bacteria	C3-C5	93.69	209062	14081	94.15	724	45	343	804	348	813	460	-	0	0	2842	0	0	194	0	0	0	0	0
KP_F047-OP_R032	Bacteria	C3-C5	93.84	209399	13744	93.89	722	47	343	801	348	810	457	-	0	0	2842	0	0	194	0	0	0	0	0
KP_F047-OP_R036	Bacteria	C3-C5	93.44	208499	14644	94.02	723	46	343	805	348	814	461	-	0	0	2842	0	0	194	0	0	0	0	0
KP_F047-OP_R048	Bacteria	C3-C5	93.25	208091	15052	93.89	722	47	343	805	348	814	461	-	0	0	2842	0	0	194	0	0	0	0	0
KP_F047-OP_R050	Bacteria	C3-C6	91.46	204093	19050	88.43	680	89	343	925	335	935	581	-	0	0	2842	0	0	194	0	0	0	0	0
KP_F047-OP_R052	Bacteria	C3-C6	91.74	204718	18425	88.43	680	89	343	925	335	935	581	-	0	0	2842	0	0	194	0	0	0	0	0
KP_F047-OP_R066	Bacteria	C3-C5	90.19	201261	21882	85.31	656	113	343	804	348	814	461	-	0	0	2842	0	0	194	0	0	0	0	0
KP_F047-OP_R067	Bacteria	C3-C6	91.91	205083	18060	88.43	680	89	343	925	335	935	581	-	0	0	2842	0	0	194	0	0	0	0	0
KP_F047-OP_R070	Bacteria	C3-C5	96.68	215727	7416	95.58	735	34	343	803	335	813	460	-	0	0	2842	0	0	194	0	0	0	0	0
KP_F047-OP_R073	Bacteria	C3-C6	96.28	214848	8295	94.93	730	39	343	892	335	903	549	-	0	0	2842	0	0	194	0	0	0	0	0
KP_F047-OP_R079	Bacteria	C3-C5	93.35	208306	14837	85.83	660	109	343	802	335	813	460	-	0	0	2842	0	0	194	0	0	0	0	0
KP_F047-OP_R086	Bacteria	C3-C5	90.04	200918	22225	84.01	646	123	343	800	348	810	457	-	0	0	2842	0	0	194	0	0	0	0	0
KP_F047-OP_R088	Bacteria	C3-C5	89.96	200737	22406	84.27	648	121	343	804	348	814	461	-	0	0	2842	0	0	194	0	0	0	0	0
KP_F047-OP_R089	Bacteria	C3-C6	79.91	178309	44834	84.27	648	121	345	925	348	935	580	-	0	0	2842	0	0	194	0	0	0	0	0
KP_F047-OP_R108	Bacteria	C3-C6	75.75	169038	54105	81.01	623	146	345	925	348	935	580	-	0	0	2842	0	0	194	0	0	0	0	0
KP_F047-OP_R119	Bacteria	C3-C5	96.08	214388	8755	92.59	712	57	343	804	335	814	461	-	0	0	2842	0	0	194	0	0	0	0	0
KP_F047-OP_R139	Bacteria	C3-C5	89.6	199944	23199	83.75	644	125	343	804	348	814	461	-	0	0	2842	0	0	194	0	0	0	0	0
KP_F047-OP_R143	Bacteria	C3-C6	75.93	169427	53716	81.01	623	146	345	924	348	934	579	-	0	0	2842	0	0	194	0	0	0	0	0
KP_F047-OP_UI005	Bacteria	C3-C6	75.84	169243	53900	81.01	623	146	345	925	348	935	580	-	0	0	2842	0	0	194	0	0	0	0	0
KP_F048-KP_R029	Bacteria	C3-C5	89.52	199752	23391	85.57	658	111	345	804	350	814	459	-	0	0	2842	0	0	194	0	0	0	0	0
KP_F048-KP_R030	Bacteria	C3-C5	90.86	202739	20404	86.87	668	101	345	796	350	806	451	-	0	0	2842	0	0	194	0	0	0	0	0
KP_F048-KP_R031	Bacteria	C3-C5	96.99	216423	6720	97.53	750	19	345	800	337	810	455	-	0	0	2842	0	0	194	0	0	0	0	0
KP_F048-KP_R032	Bacteria	C3-C5	93.9	209533	13610	96.1	739	30	345	801	350	810	455	-	0	0	2842	0	0	194	0	0	0	0	0
KP_F048-KP_R033	Bacteria	C3-C5	90.53	202023	21120	86.22	663	106	345	801	350	811	456	-	0	0	2842	0	0	194	0	0	0	0	0
KP_F048-KP_R034	Bacteria	C3-C5	93.35	208295	14848	93.24	717	52	345	802	350	811	456	-	0	0	2842	0	0	194	0	0	0	0	0
KP_F048-KP_R035	Bacteria	C3-C5	93.63	208938	14205	95.97	738	31	345	804	350	813	458	-	0	0	2842	0	0	194	0	0	0	0	0
KP_F048-KP_R036	Bacteria	C3-C5	90.41	201744	21399	86.22	663	106	345	803	350	813	458	-	0	0	2842	0	0	194	0	0	0	0	0
KP_F048-KP_R037	Bacteria	C3-C5	90.09	201036	22107	86.09	662	107	345	804	350	814	459	-	0	0	2842	0	0	194	0	0	0	0	0
KP_F048-KP_R038	Bacteria	C3-C5	93.39	208385	14758	95.71	736	33	345	805	350	814	459	-	0	0	2842	0	0	194	0	0	0	0	0
KP_F048-KP_R039	Bacteria	C3-C6	75.87	169309	53834	83.75	644	125	347	925	350	935	578	-	0	0	2842	0	0	194	0	0	0	0	0
KP_F048-KP_R040	Bacteria	C3-C6	91.44	204047	19096	89.34	687	82	345	925	337	935	579	-	0	0	2842	0	0	194	0	0	0	0	0
KP_F048-KP_R041	Bacteria	C3-C6	91.64	204488	18655	89.34	687	82	345	924	337	934	578	-	0	0	2842	0	0	194	0	0	0	0	0
KP_F048-OP_R010	Bacteria	C3-C5	93.39	208390	14753	95.71	736	33	346	805	350	814	459	-	0	0	2842	0	0	194	0	0	0	0	0
KP_F048-OP_R014	Bacteria	C3-C5	93.39	208394	14749	95.71	736	33	346	805	350	814	459	-	0	0	2842	0	0	194	0	0	0	0	0
KP_F048-OP_R020	Bacteria	C3-C5	93.73	209153	13990	95.97	738	31	345	804	350	813	458	-	0	0	2842	0	0	194	0	0	0	0	0
KP_F048-OP_R032	Bacteria	C3-C5	93.88	209493	13650	95.71	736	33	345	801	350	810	455	-	0	0	2842	0	0	194	0	0	0	0	0
KP_F048-OP_R036	Bacteria	C3-C5	93.48	208591	14552	95.84	737	32	345	805	350	814	459	-	0	0	2842	0	0	194	0	0	0	0	0
KP_F048-OP_R048	Bacteria	C3-C5	93.3	208183	14960	95.71	736	33	345	805	350	814	459	-	0	0	2842	0	0	194	0	0	0	0	0
KP_F048-OP_R050	Bacteria	C3-C6	91.51	204199	18944	90.25	694	75	345	925	337	935	579	-	0	0	2842	0	0	194	0	0	0	0	0
KP_F048-OP_R052	Bacteria	C3-C6	91.79	204823	18320	90.25	694	75	345	925	337	935	579	-	0	0	2842	0	0	194	0	0	0	0	0
KP_F048-OP_R066	Bacteria	C3-C5	90.24	201365	21778	87.13	670	99	345	804	350	814	459	-	0	0	2842	0	0	194	0	0	0	0	0
KP_F048-OP_R067	Bacteria	C3-C6	91.95	205188	17955	90.25	694	75	345	925	337	935	579	-	0	0	2842	0	0	194	0	0	0	0	0
KP_F048-OP_R070	Bacteria	C3-C5	96.72	215815	7328	97.4	749	20	345	803	337	813	458	-	0	0	2842	0	0	194	0	0	0	0	0
KP_F048-OP_R073	Bacteria	C3-C6	96.33	214952	8191	96.88	745	24	345	892	337	903	547	-	0	0	2842	0	0	194	0	0	0	0	0
KP_F048-OP_R079	Bacteria	C3-C5	93.39	208402	14741	87.65	674	95	345	802	337	813	458	-	0	0	2842	0	0	194	0	0	0	0	0
KP_F048-OP_R086	Bacteria	C3-C5	90.08	201019	22124	85.83	660	109	345	800	350	810	455	-	0	0	2842	0	0	194	0	0	0	0	0
KP_F048-OP_R088	Bacteria	C3-C5	90	200837	22306	86.09	662	107	345	804	350	814	459	-	0	0	2842	0	0	194	0	0	0	0	0
KP_F048-OP_R089	Bacteria	C3-C6	79.95	178397	44746	86.09	662	107	347	925	350	935	578	-	0	0	2842	0	0	194	0	0	0	0	0
KP_F048-OP_R108	Bacteria	C3-C6	75.81	169161	53982	82.83	637	132	347	925	350	935	578	-	0	0	2842	0	0	194	0	0	0	0	0
KP_F048-OP_R119	Bacteria	C3-C5	96.11	214472	8671	94.41	726	43	345	804	337	814	459	-	0	0	2842	0	0	194	0	0	0	0	0
KP_F048-OP_R139	Bacteria	C3-C5	89.65	200043	23100	85.57	658	111	345	804	350	814	459	-	0	0	2842	0	0	194	0	0	0	0	0
KP_F048-OP_R143	Bacteria	C3-C6	75.98	169550	53593	82.83	637	132	347	924	350	934	577	-	0	0	2842	0	0	194	0	0	0	0	0
KP_F048-OP_UI005	Bacteria	C3-C6	75.9	169366	53777	82.83	637	132	347	925	350	935	578	-	0	0	2842	0	0	194	0	0	0	0	0
KP_F049-KP_R029	Bacteria	C3-C5	88.6	197709	25434	75.94	584	185	349	804	354	814	455	-	0	0	2842	0	0	194	0	0	0	0	0
KP_F049-KP_R030	Bacteria	C3-C5	89.93	200677	22466	77.5	596	173	349	796	354	806	447	-	0	0	2842	0	0	194	0	0	0	0	0
KP_F049-KP_R031	Bacteria	C3-C5	96.04	214307	8836	88.17	678	91	349	800	341	810	451	-	0	0	2842	0	0	194	0	0	0	0	0
KP_F049-KP_R032	Bacteria	C3-C5	92.96	207436	15707	86.74	667	102	349	801	354	810	451	-	0	0	2842	0	0	194	0	0	0	0	0
KP_F049-KP_R033	Bacteria	C3-C5	89.61	199967	23176	76.59	589	180	349	801	354	811	452	-	0	0	2842	0	0	194	0	0	0	0	0
KP_F049-KP_R034	Bacteria	C3-C5	92.41	206203	16940	83.62	643	126	349	802	354	811	452	-	0	0	2842	0	0	194	0	0	0	0	0
KP_F049-KP_R035	Bacteria	C3-C5	92.7	206850	16293	86.61	666	103	349	804	354	813	454	-	0	0	2842	0	0	194	0	0	0	0	0
KP_F049-KP_R036	Bacteria	C3-C5	89.49	199690	23453	76.59	589	180	349	803	354	813	454	-	0	0	2842	0	0	194	0	0	0	0	0
KP_F049-KP_R037	Bacteria	C3-C5	89.17	198982	24161	76.46	588	181	349	804	354	814	455	-	0	0	2842	0	0	194	0	0	0	0	0
KP_F049-KP_R038	Bacteria	C3-C5	92.45	206295	16848	86.35	664	105	349	805	354	814	455	-	0	0	2842	0	0	194	0	0	0	0	0
KP_F049-KP_R039	Bacteria	C3-C6	75	167366	55777	74.12	570	199	351	925	354	935	574	-	0	0	2842	0	0	194	0	0	0	0	0
KP_F049-KP_R040	Bacteria	C3-C6	90.53	202002	21141	79.71	613	156	349	925	341	935	575	-	0	0	2842	0	0	194	0	0	0	0	0
KP_F049-KP_R041	Bacteria	C3-C6	90.72	202436	20707	79.71	613	156	349	924	341	934	574	-	0	0	2842	0	0	194	0	0	0	0	0
KP_F049-OP_R010	Bacteria	C3-C5	92.45	206300	16843	86.35	664	105	349	805	354	814	455	-	0	0	2842	0	0	194	0	0	0	0	0
KP_F049-OP_R014	Bacteria	C3-C5	92.45	206304	16839	86.35	664	105	349	805	354	814	455	-	0	0	2842	0	0	194	0	0	0	0	0
KP_F049-OP_R020	Bacteria	C3-C5	92.79	207063	16080	86.61	666	103	349	804	354	813	454	-	0	0	2842	0	0	194	0	0	0	0	0
KP_F049-OP_R032	Bacteria	C3-C5	92.94	207396	15747	86.35	664	105	349	801	354	810	451	-	0	0	2842	0	0	194	0	0	0	0	0
KP_F049-OP_R036	Bacteria	C3-C5	92.54	206504	16639	86.48	665	104	349	805	354	814	455	-	0	0	2842	0	0	194	0	0	0	0	0
KP_F049-OP_R048	Bacteria	C3-C5	92.36	206095	17048	86.35	664	105	349	805	354	814	455	-	0	0	2842	0	0	194	0	0	0	0	0
KP_F049-OP_R050	Bacteria	C3-C6	90.59	202154	20989	80.62	620	149	349	925	341	935	575	-	0	0	2842	0	0	194	0	0	0	0	0
KP_F049-OP_R052	Bacteria	C3-C6	90.87	202769	20374	80.62	620	149	349	925	341	935	575	-	0	0	2842	0	0	194	0	0	0	0	0
KP_F049-OP_R066	Bacteria	C3-C5	89.32	199311	23832	77.76	598	171	349	804	354	814	455	-	0	0	2842	0	0	194	0	0	0	0	0
KP_F049-OP_R067	Bacteria	C3-C6	91.03	203129	20014	80.62	620	149	349	925	341	935	575	-	0	0	2842	0	0	194	0	0	0	0	0
KP_F049-OP_R070	Bacteria	C3-C5	95.77	213708	9435	88.04	677	92	349	803	341	813	454	-	0	0	2842	0	0	194	0	0	0	0	0
KP_F049-OP_R073	Bacteria	C3-C6	95.39	212855	10288	87.52	673	96	349	892	341	903	543	-	0	0	2842	0	0	194	0	0	0	0	0
KP_F049-OP_R079	Bacteria	C3-C5	92.47	206332	16811	78.02	600	169	349	802	341	813	454	-	0	0	2842	0	0	194	0	0	0	0	0
KP_F049-OP_R086	Bacteria	C3-C5	89.17	198968	24175	76.2	586	183	349	800	354	810	451	-	0	0	2842	0	0	194	0	0	0	0	0
KP_F049-OP_R088	Bacteria	C3-C5	89.08	198786	24357	76.46	588	181	349	804	354	814	455	-	0	0	2842	0	0	194	0	0	0	0	0
KP_F049-OP_R089	Bacteria	C3-C6	79.06	176414	46729	76.59	589	180	351	925	354	935	574	-	0	0	2842	0	0	194	0	0	0	0	0
KP_F049-OP_R108	Bacteria	C3-C6	74.94	167218	55925	73.21	563	206	351	925	354	935	574	-	0	0	2842	0	0	194	0	0	0	0	0
KP_F049-OP_R119	Bacteria	C3-C5	95.17	212362	10781	84.79	652	117	349	804	341	814	455	-	0	0	2842	0	0	194	0	0	0	0	0
KP_F049-OP_R139	Bacteria	C3-C5	88.73	197995	25148	75.94	584	185	349	804	354	814	455	-	0	0	2842	0	0	194	0	0	0	0	0
KP_F049-OP_R143	Bacteria	C3-C6	75.11	167601	55542	73.21	563	206	351	924	354	934	573	-	0	0	2842	0	0	194	0	0	0	0	0
KP_F049-OP_UI005	Bacteria	C3-C6	75.03	167422	55721	73.21	563	206	351	925	354	935	574	-	0	0	2842	0	0	194	0	0	0	0	0
KP_F050-KP_R029	Bacteria	C3-C5	84.52	188601	34542	78.67	605	164	374	805	379	814	430	-	0	0	2842	0	0	194	0	0	0	0	0
KP_F050-KP_R030	Bacteria	C3-C5	85.53	190846	32297	79.97	615	154	374	797	379	806	422	-	0	0	2842	0	0	194	0	0	0	0	0
KP_F050-KP_R031	Bacteria	C3-C5	91.4	203953	19190	89.73	690	79	375	801	379	810	426	-	0	0	2842	0	0	194	0	0	0	0	0
KP_F050-KP_R032	Bacteria	C3-C5	88.53	197555	25588	88.3	679	90	375	801	379	810	426	-	0	0	2842	0	0	194	0	0	0	0	0
KP_F050-KP_R033	Bacteria	C3-C5	85.24	190214	32929	79.32	610	159	374	802	379	811	427	-	0	0	2842	0	0	194	0	0	0	0	0
KP_F050-KP_R034	Bacteria	C3-C5	88.02	196405	26738	85.57	658	111	375	802	379	811	427	-	0	0	2842	0	0	194	0	0	0	0	0
KP_F050-KP_R035	Bacteria	C3-C5	88.29	197003	26140	88.17	678	91	375	804	379	813	429	-	0	0	2842	0	0	194	0	0	0	0	0
KP_F050-KP_R036	Bacteria	C3-C5	85.13	189959	33184	79.32	610	159	374	804	379	813	429	-	0	0	2842	0	0	194	0	0	0	0	0
KP_F050-KP_R037	Bacteria	C3-C5	85.06	189811	33332	79.19	609	160	374	805	379	814	430	-	0	0	2842	0	0	194	0	0	0	0	0
KP_F050-KP_R038	Bacteria	C3-C5	88.28	196998	26145	87.91	676	93	375	805	379	814	430	-	0	0	2842	0	0	194	0	0	0	0	0
KP_F050-KP_R039	Bacteria	C3-C6	71.4	159317	63826	75.81	583	186	376	926	379	935	550	-	0	0	2842	0	0	194	0	0	0	0	0
KP_F050-KP_R040	Bacteria	C3-C6	86.96	194040	29103	82.05	631	138	375	926	379	935	551	-	0	0	2842	0	0	194	0	0	0	0	0
KP_F050-KP_R041	Bacteria	C3-C6	87.14	194457	28686	82.05	631	138	375	925	379	934	550	-	0	0	2842	0	0	194	0	0	0	0	0
KP_F050-OP_R010	Bacteria	C3-C5	88.28	197002	26141	87.91	676	93	375	805	379	814	430	-	0	0	2842	0	0	194	0	0	0	0	0
KP_F050-OP_R014	Bacteria	C3-C5	88.29	197006	26137	87.91	676	93	375	805	379	814	430	-	0	0	2842	0	0	194	0	0	0	0	0
KP_F050-OP_R020	Bacteria	C3-C5	88.38	197205	25938	88.17	678	91	375	804	379	813	429	-	0	0	2842	0	0	194	0	0	0	0	0
KP_F050-OP_R032	Bacteria	C3-C5	88.51	197515	25628	87.91	676	93	375	801	379	810	426	-	0	0	2842	0	0	194	0	0	0	0	0
KP_F050-OP_R036	Bacteria	C3-C5	88.37	197203	25940	88.04	677	92	375	805	379	814	430	-	0	0	2842	0	0	194	0	0	0	0	0
KP_F050-OP_R048	Bacteria	C3-C5	88.2	196807	26336	87.91	676	93	375	805	379	814	430	-	0	0	2842	0	0	194	0	0	0	0	0
KP_F050-OP_R050	Bacteria	C3-C6	86.98	194081	29062	82.31	633	136	375	926	379	935	551	-	0	0	2842	0	0	194	0	0	0	0	0
KP_F050-OP_R052	Bacteria	C3-C6	87.24	194667	28476	82.31	633	136	375	926	379	935	551	-	0	0	2842	0	0	194	0	0	0	0	0
KP_F050-OP_R066	Bacteria	C3-C5	85.18	190079	33064	80.23	617	152	374	805	379	814	430	-	0	0	2842	0	0	194	0	0	0	0	0
KP_F050-OP_R067	Bacteria	C3-C6	87.39	195008	28135	82.31	633	136	375	926	379	935	551	-	0	0	2842	0	0	194	0	0	0	0	0
KP_F050-OP_R070	Bacteria	C3-C5	91.15	203390	19753	89.6	689	80	375	804	379	813	429	-	0	0	2842	0	0	194	0	0	0	0	0
KP_F050-OP_R073	Bacteria	C3-C6	91.73	204689	18454	89.34	687	82	375	893	379	903	518	-	0	0	2842	0	0	194	0	0	0	0	0
KP_F050-OP_R079	Bacteria	C3-C5	87.9	196141	27002	80.75	621	148	374	803	379	813	429	-	0	0	2842	0	0	194	0	0	0	0	0
KP_F050-OP_R086	Bacteria	C3-C5	84.82	189270	33873	78.93	607	162	374	801	379	810	426	-	0	0	2842	0	0	194	0	0	0	0	0
KP_F050-OP_R088	Bacteria	C3-C5	84.98	189625	33518	79.19	609	160	374	805	379	814	430	-	0	0	2842	0	0	194	0	0	0	0	0
KP_F050-OP_R089	Bacteria	C3-C6	74.49	166219	56924	78.54	604	165	376	926	379	935	550	-	0	0	2842	0	0	194	0	0	0	0	0
KP_F050-OP_R108	Bacteria	C3-C6	71.38	159280	63863	75.55	581	188	376	926	379	935	550	-	0	0	2842	0	0	194	0	0	0	0	0
KP_F050-OP_R119	Bacteria	C3-C5	90.82	202665	20478	86.74	667	102	375	805	379	814	430	-	0	0	2842	0	0	194	0	0	0	0	0
KP_F050-OP_R139	Bacteria	C3-C5	84.64	188876	34267	78.67	605	164	374	805	379	814	430	-	0	0	2842	0	0	194	0	0	0	0	0
KP_F050-OP_R143	Bacteria	C3-C6	71.54	159646	63497	75.55	581	188	376	925	379	934	549	-	0	0	2842	0	0	194	0	0	0	0	0
KP_F050-OP_UI005	Bacteria	C3-C6	71.46	159465	63678	75.55	581	188	376	926	379	935	550	-	0	0	2842	0	0	194	0	0	0	0	0
KP_F051-KP_R039	Bacteria	C4-C6	75.92	169416	53727	85.18	655	114	513	925	522	935	412	V3-C6	0.14	4	2838	1.03	2	192	451	868	455	871	416
KP_F051-KP_R040	Bacteria	C4-C6	91.46	204080	19063	90.77	698	71	513	925	522	935	412	-	0	0	2842	0	0	194	0	0	0	0	0
KP_F051-KP_R041	Bacteria	C4-C6	91.65	204521	18622	90.77	698	71	513	924	522	934	411	-	0	0	2842	0	0	194	0	0	0	0	0
KP_F051-KP_R046	Bacteria	C4-C7	91.08	203250	19893	90.25	694	75	511	1062	522	1075	550	-	0	0	2842	0	0	194	0	0	0	0	0
KP_F051-KP_R050	Bacteria	C4-C7	93.48	208592	14551	95.06	731	38	511	1062	522	1075	550	V3-C6	9.22	262	2580	8.25	16	178	448	996	447	996	549
KP_F051-KP_R053	Bacteria	C4-C7	96.45	215212	7931	96.36	741	28	512	1076	522	1088	563	-	0	0	2842	0	0	194	0	0	0	0	0
KP_F051-KP_R054	Bacteria	C4-C7	87.83	195979	27164	93.37	718	51	512	1078	522	1090	566	-	0	0	2842	0	0	194	0	0	0	0	0
KP_F051-KP_R055	Bacteria	C4-C7	87.64	195556	27587	93.37	718	51	512	1079	522	1091	567	-	0	0	2842	0	0	194	0	0	0	0	0
KP_F051-KP_R074	Bacteria	C4-V7	97.27	217046	6097	98.7	759	10	512	1112	522	1125	600	V3-C7	50.6	1438	1404	59.79	116	78	450	1050	453	1049	600
KP_F051-OP_R030	Bacteria	C4-C7	96.68	215732	7411	98.83	760	9	512	1079	522	1091	566	-	0	0	2842	0	0	194	0	0	0	0	0
KP_F051-OP_R050	Bacteria	C4-C6	91.52	204232	18911	91.68	705	64	513	925	522	935	412	V3-C6	0.14	4	2838	1.03	2	192	451	868	455	871	416
KP_F051-OP_R052	Bacteria	C4-C6	91.8	204857	18286	91.68	705	64	513	925	522	935	412	V3-C6	0.14	4	2838	1.03	2	192	451	868	455	871	416
KP_F051-OP_R067	Bacteria	C4-C6	91.97	205226	17917	91.68	705	64	513	925	522	935	412	V3-C6	0.14	4	2838	1.03	2	192	451	868	455	871	416
KP_F051-OP_R073	Bacteria	C4-C6	96.34	214976	8167	98.83	760	9	512	892	522	903	380	V3-V5	50.18	1426	1416	57.22	111	83	450	835	453	838	385
KP_F051-OP_R089	Bacteria	C4-C6	79.99	178504	44639	87.78	675	94	512	925	522	935	412	V3-C6	0.14	4	2838	1.03	2	192	451	868	455	871	416
KP_F051-OP_R108	Bacteria	C4-C6	75.86	169268	53875	84.27	648	121	513	925	522	935	412	-	0	0	2842	0	0	194	0	0	0	0	0
KP_F051-OP_R143	Bacteria	C4-C6	76.03	169658	53485	84.27	648	121	513	924	522	934	411	-	0	0	2842	0	0	194	0	0	0	0	0
KP_F051-OP_UI005	Bacteria	C4-C6	75.95	169472	53671	84.27	648	121	513	925	522	935	412	-	0	0	2842	0	0	194	0	0	0	0	0
KP_F051-OP_UI009	Bacteria	C4-C7	90.38	201672	21471	89.08	685	84	512	1072	522	1085	560	-	0	0	2842	0	0	194	0	0	0	0	0
KP_F052-KP_R039	Bacteria	C4-C6	72.61	162032	61111	84.01	646	123	515	926	523	935	411	-	0	0	2842	0	0	194	0	0	0	0	0
KP_F052-KP_R040	Bacteria	C4-C6	88.09	196571	26572	89.6	689	80	514	925	523	935	411	-	0	0	2842	0	0	194	0	0	0	0	0
KP_F052-KP_R041	Bacteria	C4-C6	88.28	197000	26143	89.6	689	80	514	924	523	934	410	-	0	0	2842	0	0	194	0	0	0	0	0
KP_F052-KP_R046	Bacteria	C4-C7	87.77	195853	27290	88.82	683	86	513	1062	523	1075	549	-	0	0	2842	0	0	194	0	0	0	0	0
KP_F052-KP_R050	Bacteria	C4-C7	89.84	200469	22674	91.94	707	62	513	1063	523	1075	549	V3-V6	1.72	49	2793	3.61	7	187	448	995	459	1006	547
KP_F052-KP_R053	Bacteria	C4-C7	92.65	206746	16397	93.11	716	53	514	1076	523	1088	562	-	0	0	2842	0	0	194	0	0	0	0	0
KP_F052-KP_R054	Bacteria	C4-C7	84.06	187574	35569	90.12	693	76	514	1078	523	1090	564	-	0	0	2842	0	0	194	0	0	0	0	0
KP_F052-KP_R055	Bacteria	C4-C7	83.88	187166	35977	90.12	693	76	514	1079	523	1091	565	-	0	0	2842	0	0	194	0	0	0	0	0
KP_F052-KP_R056	Bacteria	C4-V7	88.31	197067	26076	80.62	620	149	514	1113	523	1125	600	-	0	0	2842	0	0	194	0	0	0	0	0
KP_F052-KP_R057	Bacteria	C4-V7	85.15	190009	33134	79.58	612	157	514	1113	523	1125	600	-	0	0	2842	0	0	194	0	0	0	0	0
KP_F052-KP_R074	Bacteria	C4-V7	93.47	208572	14571	95.45	734	35	514	1113	523	1125	599	V3-V6	3.24	92	2750	9.79	19	175	446	1043	443	1040	597
KP_F052-OP_R026	Bacteria	C4-V7	84.8	189226	33917	78.02	600	169	514	1113	523	1125	600	-	0	0	2842	0	0	194	0	0	0	0	0
KP_F052-OP_R030	Bacteria	C4-C7	92.89	207286	15857	95.58	735	34	514	1079	523	1091	565	-	0	0	2842	0	0	194	0	0	0	0	0
KP_F052-OP_R050	Bacteria	C4-C6	88.16	196719	26424	90.51	696	73	514	925	523	935	411	-	0	0	2842	0	0	194	0	0	0	0	0
KP_F052-OP_R052	Bacteria	C4-C6	88.43	197325	25818	90.51	696	73	514	925	523	935	411	-	0	0	2842	0	0	194	0	0	0	0	0
KP_F052-OP_R067	Bacteria	C4-C6	88.59	197683	25460	90.51	696	73	514	925	523	935	411	-	0	0	2842	0	0	194	0	0	0	0	0
KP_F052-OP_R073	Bacteria	C4-C6	92.56	206532	16611	95.71	736	33	514	893	523	903	379	V3-C5	3.24	92	2750	9.79	19	175	446	829	443	826	383
KP_F052-OP_R089	Bacteria	C4-C6	76.66	171061	52082	86.48	665	104	514	925	523	935	411	-	0	0	2842	0	0	194	0	0	0	0	0
KP_F052-OP_R108	Bacteria	C4-C6	72.55	161888	61255	83.09	639	130	515	926	523	935	411	-	0	0	2842	0	0	194	0	0	0	0	0
KP_F052-OP_R143	Bacteria	C4-C6	72.72	162266	60877	83.09	639	130	515	925	523	934	410	-	0	0	2842	0	0	194	0	0	0	0	0
KP_F052-OP_UI005	Bacteria	C4-C6	72.64	162083	61060	83.09	639	130	515	926	523	935	411	-	0	0	2842	0	0	194	0	0	0	0	0
KP_F052-OP_UI009	Bacteria	C4-C7	87.07	194289	28854	87.52	673	96	513	1073	523	1085	559	-	0	0	2842	0	0	194	0	0	0	0	0
KP_F054-KP_R039	Bacteria	C4-C6	72.75	162338	60805	84.01	646	123	516	926	524	935	410	-	0	0	2842	0	0	194	0	0	0	0	0
KP_F054-KP_R040	Bacteria	C4-C6	88.25	196932	26211	89.6	689	80	515	925	524	935	410	-	0	0	2842	0	0	194	0	0	0	0	0
KP_F054-KP_R041	Bacteria	C4-C6	88.45	197361	25782	89.6	689	80	515	924	524	934	409	-	0	0	2842	0	0	194	0	0	0	0	0
KP_F054-KP_R046	Bacteria	C4-C7	87.93	196215	26928	88.82	683	86	514	1062	524	1075	548	-	0	0	2842	0	0	194	0	0	0	0	0
KP_F054-KP_R050	Bacteria	C4-C7	90	200839	22304	91.94	707	62	514	1062	524	1075	548	V3-V6	1.72	49	2793	3.61	7	187	449	995	460	1006	546
KP_F054-KP_R053	Bacteria	C4-C7	92.82	207131	16012	93.11	716	53	515	1076	524	1088	561	-	0	0	2842	0	0	194	0	0	0	0	0
KP_F054-KP_R054	Bacteria	C4-C7	84.22	187939	35204	90.12	693	76	515	1078	524	1090	563	-	0	0	2842	0	0	194	0	0	0	0	0
KP_F054-KP_R055	Bacteria	C4-C7	84.04	187531	35612	90.12	693	76	515	1079	524	1091	564	-	0	0	2842	0	0	194	0	0	0	0	0
KP_F054-KP_R056	Bacteria	C4-V7	88.48	197430	25713	80.62	620	149	515	1113	524	1125	599	-	0	0	2842	0	0	194	0	0	0	0	0
KP_F054-KP_R057	Bacteria	C4-V7	85.31	190361	32782	79.58	612	157	515	1113	524	1125	599	-	0	0	2842	0	0	194	0	0	0	0	0
KP_F054-KP_R074	Bacteria	C4-V7	93.64	208956	14187	95.45	734	35	515	1113	524	1125	598	V3-V6	3.24	92	2750	9.79	19	175	447	1043	444	1040	596
KP_F054-OP_R026	Bacteria	C4-V7	84.96	189576	33567	78.02	600	169	515	1113	524	1125	599	-	0	0	2842	0	0	194	0	0	0	0	0
KP_F054-OP_R030	Bacteria	C4-C7	93.07	207671	15472	95.58	735	34	515	1079	524	1091	564	-	0	0	2842	0	0	194	0	0	0	0	0
KP_F054-OP_R050	Bacteria	C4-C6	88.32	197080	26063	90.51	696	73	515	925	524	935	410	-	0	0	2842	0	0	194	0	0	0	0	0
KP_F054-OP_R052	Bacteria	C4-C6	88.59	197686	25457	90.51	696	73	515	925	524	935	410	-	0	0	2842	0	0	194	0	0	0	0	0
KP_F054-OP_R067	Bacteria	C4-C6	88.75	198046	25097	90.51	696	73	515	925	524	935	410	-	0	0	2842	0	0	194	0	0	0	0	0
KP_F054-OP_R073	Bacteria	C4-C6	92.73	206916	16227	95.71	736	33	515	893	524	903	378	V3-C5	3.24	92	2750	9.79	19	175	447	829	444	826	382
KP_F054-OP_R089	Bacteria	C4-C6	76.81	171388	51755	86.48	665	104	515	925	524	935	410	-	0	0	2842	0	0	194	0	0	0	0	0
KP_F054-OP_R108	Bacteria	C4-C6	72.69	162194	60949	83.09	639	130	516	926	524	935	410	-	0	0	2842	0	0	194	0	0	0	0	0
KP_F054-OP_R143	Bacteria	C4-C6	72.86	162572	60571	83.09	639	130	516	925	524	934	409	-	0	0	2842	0	0	194	0	0	0	0	0
KP_F054-OP_UI005	Bacteria	C4-C6	72.77	162390	60753	83.09	639	130	516	926	524	935	410	-	0	0	2842	0	0	194	0	0	0	0	0
KP_F054-OP_UI009	Bacteria	C4-C7	87.23	194652	28491	87.52	673	96	514	1073	524	1085	558	-	0	0	2842	0	0	194	0	0	0	0	0
KP_F055-KP_R039	Bacteria	C4-C6	72.4	161549	61594	78.41	603	166	517	926	525	935	409	-	0	0	2842	0	0	194	0	0	0	0	0
KP_F055-KP_R040	Bacteria	C4-C6	87.9	196143	27000	84.01	646	123	516	925	525	935	409	-	0	0	2842	0	0	194	0	0	0	0	0
KP_F055-KP_R041	Bacteria	C4-C6	88.09	196572	26571	84.01	646	123	516	924	525	934	408	-	0	0	2842	0	0	194	0	0	0	0	0
KP_F055-KP_R046	Bacteria	C4-C7	87.58	195421	27722	83.22	640	129	515	1062	525	1075	547	-	0	0	2842	0	0	194	0	0	0	0	0
KP_F055-KP_R050	Bacteria	C4-C7	89.65	200048	23095	86.35	664	105	515	1062	525	1075	547	V3-V6	1.72	49	2793	3.61	7	187	450	995	461	1006	545
KP_F055-KP_R053	Bacteria	C4-C7	92.47	206337	16806	87.39	672	97	516	1076	525	1088	560	-	0	0	2842	0	0	194	0	0	0	0	0
KP_F055-KP_R054	Bacteria	C4-C7	83.87	187145	35998	84.4	649	120	516	1078	525	1090	563	-	0	0	2842	0	0	194	0	0	0	0	0
KP_F055-KP_R055	Bacteria	C4-C7	83.68	186737	36406	84.4	649	120	516	1079	525	1091	564	-	0	0	2842	0	0	194	0	0	0	0	0
KP_F055-KP_R056	Bacteria	C4-V7	88.12	196642	26501	75.03	577	192	516	1113	525	1125	598	-	0	0	2842	0	0	194	0	0	0	0	0
KP_F055-KP_R057	Bacteria	C4-V7	84.95	189570	33573	73.99	569	200	516	1113	525	1125	598	-	0	0	2842	0	0	194	0	0	0	0	0
KP_F055-KP_R074	Bacteria	C4-V7	93.28	208159	14984	89.73	690	79	516	1113	525	1125	597	V3-C7	1.83	52	2790	4.12	8	186	451	1046	461	1056	595
KP_F055-OP_R026	Bacteria	C4-V7	84.6	188786	34357	72.43	557	212	516	1113	525	1125	598	-	0	0	2842	0	0	194	0	0	0	0	0
KP_F055-OP_R030	Bacteria	C4-C7	92.71	206878	16265	89.86	691	78	516	1079	525	1091	563	-	0	0	2842	0	0	194	0	0	0	0	0
KP_F055-OP_R050	Bacteria	C4-C6	87.97	196291	26852	84.92	653	116	516	925	525	935	409	-	0	0	2842	0	0	194	0	0	0	0	0
KP_F055-OP_R052	Bacteria	C4-C6	88.24	196897	26246	84.92	653	116	516	925	525	935	409	-	0	0	2842	0	0	194	0	0	0	0	0
KP_F055-OP_R067	Bacteria	C4-C6	88.4	197256	25887	84.92	653	116	516	925	525	935	409	-	0	0	2842	0	0	194	0	0	0	0	0
KP_F055-OP_R073	Bacteria	C4-C6	92.37	206115	17028	90.12	693	76	516	893	525	903	377	V3-V5	1.83	52	2790	4.12	8	186	451	832	461	842	381
KP_F055-OP_R089	Bacteria	C4-C6	76.45	170600	52543	80.88	622	147	516	925	525	935	409	-	0	0	2842	0	0	194	0	0	0	0	0
KP_F055-OP_R108	Bacteria	C4-C6	72.33	161405	61738	77.5	596	173	517	926	525	935	409	-	0	0	2842	0	0	194	0	0	0	0	0
KP_F055-OP_R143	Bacteria	C4-C6	72.5	161783	61360	77.5	596	173	517	925	525	934	408	-	0	0	2842	0	0	194	0	0	0	0	0
KP_F055-OP_UI005	Bacteria	C4-C6	72.42	161599	61544	77.5	596	173	517	926	525	935	409	-	0	0	2842	0	0	194	0	0	0	0	0
KP_F055-OP_UI009	Bacteria	C4-C7	86.88	193864	29279	81.92	630	139	515	1073	525	1085	557	-	0	0	2842	0	0	194	0	0	0	0	0
KP_F056-KP_R039	Bacteria	C4-C6	75.68	168884	54259	84.92	653	116	561	925	570	935	364	V3-C6	0.04	1	2841	0.52	1	193	489	858	489	858	369
KP_F056-KP_R040	Bacteria	C4-C6	91.14	203369	19774	90.51	696	73	561	925	570	935	364	-	0	0	2842	0	0	194	0	0	0	0	0
KP_F056-KP_R041	Bacteria	C4-C6	91.34	203810	19333	90.51	696	73	561	924	570	934	363	-	0	0	2842	0	0	194	0	0	0	0	0
KP_F056-KP_R046	Bacteria	C4-C7	90.76	202523	20620	89.86	691	78	559	1062	570	1075	502	-	0	0	2842	0	0	194	0	0	0	0	0
KP_F056-KP_R050	Bacteria	C4-C7	93.15	207856	15287	94.67	728	41	559	1062	570	1075	502	-	0	0	2842	0	0	194	0	0	0	0	0
KP_F056-KP_R053	Bacteria	C4-C7	95.8	213766	9377	94.93	730	39	560	1076	570	1088	515	C4-V6	0.39	11	2831	3.09	6	188	846	1431	517	1030	584
KP_F056-KP_R054	Bacteria	C4-C7	87.21	194593	28550	91.94	707	62	560	1078	570	1090	518	C4-V6	0.39	11	2831	3.09	6	188	846	1433	517	1032	586
KP_F056-KP_R055	Bacteria	C4-C7	87.01	194167	28976	91.94	707	62	560	1079	570	1091	519	C4-V6	0.39	11	2831	3.09	6	188	846	1434	517	1033	587
KP_F056-KP_R056	Bacteria	C4-V7	91.07	203226	19917	80.49	619	150	560	1113	570	1125	553	-	0	0	2842	0	0	194	0	0	0	0	0
KP_F056-KP_R057	Bacteria	C4-V7	88.28	197000	26143	81.27	625	144	560	1113	570	1125	553	-	0	0	2842	0	0	194	0	0	0	0	0
KP_F056-KP_R074	Bacteria	C4-V7	96.61	215582	7561	97.27	748	21	560	1113	570	1125	552	V3-V6	3.24	92	2750	7.73	15	179	536	1102	492	1043	566
KP_F056-OP_R026	Bacteria	C4-V7	87.56	195384	27759	77.89	599	170	560	1113	570	1125	553	-	0	0	2842	0	0	194	0	0	0	0	0
KP_F056-OP_R030	Bacteria	C4-C7	96.03	214284	8859	97.4	749	20	560	1079	570	1091	518	C4-V6	0.39	11	2831	3.09	6	188	846	1434	517	1033	587
KP_F056-OP_R050	Bacteria	C4-C6	91.21	203522	19621	91.42	703	66	561	925	570	935	364	V3-C6	0.04	1	2841	0.52	1	193	489	858	489	858	369
KP_F056-OP_R052	Bacteria	C4-C6	91.49	204145	18998	91.42	703	66	561	925	570	935	364	V3-C6	0.04	1	2841	0.52	1	193	489	858	489	858	369
KP_F056-OP_R067	Bacteria	C4-C6	91.65	204508	18635	91.42	703	66	561	925	570	935	364	V3-C6	0.04	1	2841	0.52	1	193	489	858	489	858	369
KP_F056-OP_R073	Bacteria	C4-C6	95.69	213535	9608	97.4	749	20	560	892	570	903	332	V3-C5	4.29	122	2720	8.76	17	177	524	868	489	826	343
KP_F056-OP_R089	Bacteria	C4-C6	79.75	177953	45190	87.52	673	96	560	925	570	935	364	V3-C6	0.04	1	2841	0.52	1	193	489	858	489	858	369
KP_F056-OP_R108	Bacteria	C4-C6	75.62	168735	54408	84.01	646	123	561	925	570	935	364	-	0	0	2842	0	0	194	0	0	0	0	0
KP_F056-OP_R143	Bacteria	C4-C6	75.79	169124	54019	84.01	646	123	561	924	570	934	363	-	0	0	2842	0	0	194	0	0	0	0	0
KP_F056-OP_UI005	Bacteria	C4-C6	75.71	168937	54206	84.01	646	123	561	925	570	935	364	-	0	0	2842	0	0	194	0	0	0	0	0
KP_F056-OP_UI009	Bacteria	C4-C7	90.06	200955	22188	88.69	682	87	560	1072	570	1085	512	-	0	0	2842	0	0	194	0	0	0	0	0
KP_F057-KP_R056	Bacteria	C5-V7	85.72	191289	31854	73.21	563	206	781	1113	791	1125	332	-	0	0	2842	0	0	194	0	0	0	0	0
KP_F057-KP_R057	Bacteria	C5-V7	82.56	184222	38921	72.17	555	214	781	1113	791	1125	332	-	0	0	2842	0	0	194	0	0	0	0	0
KP_F057-KP_R074	Bacteria	C5-V7	90.88	202803	20340	87.78	675	94	781	1113	791	1125	331	C5-C7	0.07	2	2840	0.52	1	193	734	1063	734	1063	329
KP_F057-OP_R026	Bacteria	C5-V7	82.21	183451	39692	70.61	543	226	781	1113	791	1125	332	-	0	0	2842	0	0	194	0	0	0	0	0
KP_F057-OP_R029	Bacteria	C5-C8	87.78	195879	27264	80.75	621	148	781	1192	791	1204	411	-	0	0	2842	0	0	194	0	0	0	0	0
KP_F058-KP_R056	Bacteria	C5-V7	85.31	190359	32784	72.17	555	214	781	1113	791	1125	332	-	0	0	2842	0	0	194	0	0	0	0	0
KP_F058-KP_R057	Bacteria	C5-V7	82.15	183306	39837	71.13	547	222	781	1113	791	1125	332	-	0	0	2842	0	0	194	0	0	0	0	0
KP_F058-KP_R074	Bacteria	C5-V7	90.44	201805	21338	86.48	665	104	781	1113	791	1125	331	-	0	0	2842	0	0	194	0	0	0	0	0
KP_F058-OP_R026	Bacteria	C5-V7	81.81	182544	40599	69.57	535	234	781	1113	791	1125	332	-	0	0	2842	0	0	194	0	0	0	0	0
KP_F058-OP_R029	Bacteria	C5-C8	87.38	194991	28152	79.97	615	154	781	1192	791	1204	411	-	0	0	2842	0	0	194	0	0	0	0	0
KP_F059-KP_R056	Bacteria	C5-V7	91.54	204257	18886	81.92	630	139	782	1113	792	1125	331	-	0	0	2842	0	0	194	0	0	0	0	0
KP_F059-KP_R057	Bacteria	C5-V7	88.69	197914	25229	82.57	635	134	782	1113	792	1125	331	-	0	0	2842	0	0	194	0	0	0	0	0
KP_F059-OP_R026	Bacteria	C5-V7	88.02	196408	26735	79.32	610	159	782	1113	792	1125	331	-	0	0	2842	0	0	194	0	0	0	0	0
KP_F059-OP_R029	Bacteria	C5-C8	93.65	208969	14174	89.6	689	80	782	1192	792	1204	410	-	0	0	2842	0	0	194	0	0	0	0	0
KP_F060-KP_R060	Bacteria	C6-C9	25.66	57266	165877	83.36	641	128	908	1410	914	1414	501	V5-C9	0.14	4	2838	1.03	2	192	848	1352	851	1356	504
KP_F060-KP_R061	Bacteria	C6-C9	25.31	56472	166671	83.36	641	128	908	1409	914	1414	501	V5-C9	0.14	4	2838	1.03	2	192	848	1352	851	1356	504
KP_F060-KP_R062	Bacteria	C6-C9	25.34	56551	166592	83.36	641	128	908	1409	914	1414	501	V5-C9	0.14	4	2838	1.03	2	192	848	1352	851	1356	504
KP_F060-KP_R075	Bacteria	C6-C9	25.22	56280	166863	83.36	641	128	908	1408	914	1413	500	V5-C9	0.14	4	2838	1.03	2	192	848	1350	851	1355	503
KP_F060-KP_R076	Bacteria	C6-C9	25.58	57090	166053	83.36	641	128	909	1409	914	1413	500	V5-C9	0.14	4	2838	1.03	2	192	848	1350	851	1355	503
KP_F060-KP_R077	Bacteria	C6-C9	21.72	48462	174681	83.09	639	130	909	1410	914	1414	501	V5-C9	0.11	3	2839	0.52	1	193	851	1355	851	1356	504
KP_F060-KP_R078	Bacteria	C6-C9	25.47	56845	166298	83.36	641	128	908	1408	914	1413	500	V5-C9	0.14	4	2838	1.03	2	192	848	1350	851	1355	503
KP_F060-OP_R055	Bacteria	C6-C9	68.32	152454	70689	65.41	503	266	906	1387	915	1397	481	-	0	0	2842	0	0	194	0	0	0	0	0
KP_F060-OP_R101	Bacteria	C6-C9	68.5	152851	70292	65.41	503	266	906	1386	915	1393	480	-	0	0	2842	0	0	194	0	0	0	0	0
KP_F060-OP_R121	Bacteria	C6-C9	25.84	57668	165475	83.36	641	128	908	1409	914	1413	500	V5-C9	0.14	4	2838	1.03	2	192	848	1350	851	1355	503
KP_F061-KP_R060	Bacteria	C6-C9	32.03	71465	151678	87.26	671	98	910	1409	909	1414	499	-	0	0	2842	0	0	194	0	0	0	0	0
KP_F061-KP_R061	Bacteria	C6-C9	31.29	69830	153313	86.61	666	103	910	1409	909	1414	499	-	0	0	2842	0	0	194	0	0	0	0	0
KP_F061-KP_R062	Bacteria	C6-C9	31.34	69925	153218	86.61	666	103	910	1409	909	1414	499	-	0	0	2842	0	0	194	0	0	0	0	0
KP_F061-KP_R063	Bacteria	C6-C10	5.08	11337	211806	73.34	564	205	907	1506	917	1503	599	-	0	0	2842	0	0	194	0	0	0	0	0
KP_F061-KP_R066	Bacteria	C6-C10	4.83	10787	212356	72.69	559	210	907	1507	917	1504	600	-	0	0	2842	0	0	194	0	0	0	0	0
KP_F061-KP_R075	Bacteria	C6-C9	31.22	69662	153481	86.61	666	103	910	1408	909	1413	498	-	0	0	2842	0	0	194	0	0	0	0	0
KP_F061-KP_R076	Bacteria	C6-C9	31.96	71309	151834	87.26	671	98	910	1408	909	1413	498	-	0	0	2842	0	0	194	0	0	0	0	0
KP_F061-KP_R077	Bacteria	C6-C9	27.52	61408	161735	86.22	663	106	910	1409	916	1414	499	-	0	0	2842	0	0	194	0	0	0	0	0
KP_F061-KP_R078	Bacteria	C6-C9	31.49	70264	152879	86.61	666	103	910	1408	909	1413	498	-	0	0	2842	0	0	194	0	0	0	0	0
KP_F061-OP_R055	Bacteria	C6-C9	81.4	181648	41495	71.91	553	216	908	1387	917	1397	479	-	0	0	2842	0	0	194	0	0	0	0	0
KP_F061-OP_R101	Bacteria	C6-C9	81.62	182120	41023	71.91	553	216	908	1386	917	1396	478	-	0	0	2842	0	0	194	0	0	0	0	0
KP_F061-OP_R121	Bacteria	C6-C9	32.23	71930	151213	87.26	671	98	910	1408	909	1413	498	-	0	0	2842	0	0	194	0	0	0	0	0
KP_F062-KP_R060	Bacteria	C6-C9	31.77	70903	152240	88.04	677	92	918	1409	917	1414	491	-	0	0	2842	0	0	194	0	0	0	0	0
KP_F062-KP_R061	Bacteria	C6-C9	31.2	69616	153527	88.04	677	92	918	1409	917	1414	491	-	0	0	2842	0	0	194	0	0	0	0	0
KP_F062-KP_R062	Bacteria	C6-C9	31.24	69711	153432	88.04	677	92	918	1409	917	1414	491	-	0	0	2842	0	0	194	0	0	0	0	0
KP_F062-KP_R063	Bacteria	C6-C10	5.04	11252	211891	73.34	564	205	915	1506	925	1503	591	-	0	0	2842	0	0	194	0	0	0	0	0
KP_F062-KP_R066	Bacteria	C6-C10	4.8	10705	212438	72.56	558	211	916	1507	925	1504	592	-	0	0	2842	0	0	194	0	0	0	0	0
KP_F062-KP_R075	Bacteria	C6-C9	31.11	69416	153727	88.04	677	92	918	1408	917	1413	490	-	0	0	2842	0	0	194	0	0	0	0	0
KP_F062-KP_R076	Bacteria	C6-C9	31.69	70715	152428	88.04	677	92	918	1408	917	1413	490	-	0	0	2842	0	0	194	0	0	0	0	0
KP_F062-KP_R077	Bacteria	C6-C9	27.4	61147	161996	87.78	675	94	918	1409	924	1414	491	-	0	0	2842	0	0	194	0	0	0	0	0
KP_F062-KP_R078	Bacteria	C6-C9	31.39	70036	153107	88.04	677	92	918	1408	917	1413	490	-	0	0	2842	0	0	194	0	0	0	0	0
KP_F062-OP_R055	Bacteria	C6-C9	78.98	176231	46912	71.91	553	216	917	1387	925	1397	471	-	0	0	2842	0	0	194	0	0	0	0	0
KP_F062-OP_R101	Bacteria	C6-C9	79.18	176691	46452	71.91	553	216	917	1386	925	1393	470	-	0	0	2842	0	0	194	0	0	0	0	0
KP_F062-OP_R121	Bacteria	C6-C9	31.98	71353	151790	88.04	677	92	918	1408	917	1413	490	-	0	0	2842	0	0	194	0	0	0	0	0
KP_F063-KP_R060	Bacteria	C6-C9	31.67	70677	152466	86.09	662	107	918	1409	917	1414	491	-	0	0	2842	0	0	194	0	0	0	0	0
KP_F063-KP_R061	Bacteria	C6-C9	31.1	69391	153752	86.09	662	107	918	1409	917	1414	491	-	0	0	2842	0	0	194	0	0	0	0	0
KP_F063-KP_R062	Bacteria	C6-C9	31.14	69485	153658	86.09	662	107	918	1409	917	1414	491	-	0	0	2842	0	0	194	0	0	0	0	0
KP_F063-KP_R063	Bacteria	C6-C10	5.03	11221	211922	72.69	559	210	915	1506	925	1503	591	-	0	0	2842	0	0	194	0	0	0	0	0
KP_F063-KP_R066	Bacteria	C6-C10	4.78	10675	212468	71.91	553	216	916	1507	925	1504	592	-	0	0	2842	0	0	194	0	0	0	0	0
KP_F063-KP_R075	Bacteria	C6-C9	31.01	69192	153951	86.09	662	107	918	1408	917	1413	490	-	0	0	2842	0	0	194	0	0	0	0	0
KP_F063-KP_R076	Bacteria	C6-C9	31.59	70490	152653	86.09	662	107	918	1408	917	1413	490	-	0	0	2842	0	0	194	0	0	0	0	0
KP_F063-KP_R077	Bacteria	C6-C9	27.31	60950	162193	85.83	660	109	918	1409	924	1414	491	-	0	0	2842	0	0	194	0	0	0	0	0
KP_F063-KP_R078	Bacteria	C6-C9	31.28	69810	153333	86.09	662	107	918	1408	917	1413	490	-	0	0	2842	0	0	194	0	0	0	0	0
KP_F063-OP_R055	Bacteria	C6-C9	78.86	175976	47167	71.78	552	217	917	1387	925	1397	471	-	0	0	2842	0	0	194	0	0	0	0	0
KP_F063-OP_R101	Bacteria	C6-C9	79.07	176435	46708	71.78	552	217	917	1386	925	1393	470	-	0	0	2842	0	0	194	0	0	0	0	0
KP_F063-OP_R121	Bacteria	C6-C9	31.87	71126	152017	86.09	662	107	918	1408	917	1413	490	-	0	0	2842	0	0	194	0	0	0	0	0
KP_F064-KP_R060	Bacteria	C6-C9	31.65	70616	152527	86.09	662	107	918	1409	917	1414	491	-	0	0	2842	0	0	194	0	0	0	0	0
KP_F064-KP_R061	Bacteria	C6-C9	31.07	69332	153811	86.09	662	107	918	1409	917	1414	491	-	0	0	2842	0	0	194	0	0	0	0	0
KP_F064-KP_R062	Bacteria	C6-C9	31.11	69425	153718	86.09	662	107	918	1409	917	1414	491	-	0	0	2842	0	0	194	0	0	0	0	0
KP_F064-KP_R063	Bacteria	C6-C10	5.02	11208	211935	72.69	559	210	915	1506	925	1503	591	-	0	0	2842	0	0	194	0	0	0	0	0
KP_F064-KP_R066	Bacteria	C6-C10	4.78	10662	212481	71.91	553	216	916	1507	925	1504	592	-	0	0	2842	0	0	194	0	0	0	0	0
KP_F064-KP_R075	Bacteria	C6-C9	30.98	69132	154011	86.09	662	107	918	1408	917	1413	490	-	0	0	2842	0	0	194	0	0	0	0	0
KP_F064-KP_R076	Bacteria	C6-C9	31.56	70428	152715	86.09	662	107	918	1408	917	1413	490	-	0	0	2842	0	0	194	0	0	0	0	0
KP_F064-KP_R077	Bacteria	C6-C9	27.29	60901	162242	85.83	660	109	918	1409	924	1414	491	-	0	0	2842	0	0	194	0	0	0	0	0
KP_F064-KP_R078	Bacteria	C6-C9	31.26	69749	153394	86.09	662	107	918	1408	917	1413	490	-	0	0	2842	0	0	194	0	0	0	0	0
KP_F064-OP_R055	Bacteria	C6-C9	78.74	175693	47450	71.78	552	217	917	1387	925	1394	471	-	0	0	2842	0	0	194	0	0	0	0	0
KP_F064-OP_R101	Bacteria	C6-C9	78.94	176151	46992	71.78	552	217	917	1386	925	1393	470	-	0	0	2842	0	0	194	0	0	0	0	0
KP_F064-OP_R121	Bacteria	C6-C9	31.85	71063	152080	86.09	662	107	918	1408	917	1413	490	-	0	0	2842	0	0	194	0	0	0	0	0
KP_F076-KP_R060	Bacteria	C7-C9	30.82	68770	154373	78.15	601	168	1100	1409	1099	1414	309	-	0	0	2842	0	0	194	0	0	0	0	0
KP_F076-KP_R061	Bacteria	C7-C9	30.1	67156	155987	77.76	598	171	1100	1409	1099	1414	309	-	0	0	2842	0	0	194	0	0	0	0	0
KP_F076-KP_R062	Bacteria	C7-C9	30.14	67249	155894	77.76	598	171	1100	1409	1099	1414	309	-	0	0	2842	0	0	194	0	0	0	0	0
KP_F076-KP_R063	Bacteria	C7-C10	5.06	11295	211848	65.67	505	264	1098	1506	1094	1503	408	-	0	0	2842	0	0	194	0	0	0	0	0
KP_F076-KP_R066	Bacteria	C7-C10	4.82	10753	212390	64.89	499	270	1098	1507	1094	1504	409	-	0	0	2842	0	0	194	0	0	0	0	0
KP_F076-KP_R075	Bacteria	C7-C9	30.01	66965	156178	77.76	598	171	1100	1408	1106	1413	308	-	0	0	2842	0	0	194	0	0	0	0	0
KP_F076-KP_R076	Bacteria	C7-C9	30.74	68589	154554	78.15	601	168	1100	1408	1099	1413	308	-	0	0	2842	0	0	194	0	0	0	0	0
KP_F076-KP_R077	Bacteria	C7-C9	26.64	59449	163694	76.98	592	177	1100	1409	1106	1414	308	-	0	0	2842	0	0	194	0	0	0	0	0
KP_F076-KP_R078	Bacteria	C7-C9	30.27	67548	155595	77.76	598	171	1100	1408	1099	1413	308	-	0	0	2842	0	0	194	0	0	0	0	0
KP_F076-OP_R121	Bacteria	C7-C9	31.01	69192	153951	78.15	601	168	1100	1408	1099	1413	308	-	0	0	2842	0	0	194	0	0	0	0	0
KP_F077-KP_R029	Bacteria	C3-C5	89.42	199535	23608	83.75	644	125	343	804	348	814	461	-	0	0	2842	0	0	194	0	0	0	0	0
KP_F077-KP_R030	Bacteria	C3-C5	90.75	202513	20630	85.05	654	115	343	796	348	806	453	-	0	0	2842	0	0	194	0	0	0	0	0
KP_F077-KP_R031	Bacteria	C3-C5	96.89	216207	6936	95.71	736	33	343	800	335	810	457	C3-C5	52.04	1479	1363	70.62	137	57	320	741	321	742	421
KP_F077-KP_R032	Bacteria	C3-C5	93.8	209316	13827	94.28	725	44	343	801	348	810	457	C3-C5	52.04	1479	1363	70.62	137	57	320	741	321	742	421
KP_F077-KP_R033	Bacteria	C3-C5	90.44	201804	21339	84.4	649	120	343	801	348	811	458	C3-C5	0.21	6	2836	0.52	1	193	320	743	320	743	423
KP_F077-KP_R034	Bacteria	C3-C5	93.25	208084	15059	91.42	703	66	343	802	348	811	458	C3-C5	1.13	32	2810	3.09	6	188	306	725	313	731	419
KP_F077-KP_R035	Bacteria	C3-C5	93.54	208725	14418	94.15	724	45	343	804	348	813	460	C3-C5	52.01	1478	1364	70.62	137	57	320	744	321	745	424
KP_F077-KP_R036	Bacteria	C3-C5	90.31	201527	21616	84.4	649	120	343	803	348	813	460	C3-C5	0.21	6	2836	0.52	1	193	320	745	320	745	425
KP_F077-KP_R037	Bacteria	C3-C5	89.99	200818	22325	84.27	648	121	343	804	348	814	461	C3-C5	0.21	6	2836	0.52	1	193	320	746	320	746	426
KP_F077-KP_R038	Bacteria	C3-C5	93.29	208171	14972	93.89	722	47	343	805	348	814	461	C3-C5	51.9	1475	1367	69.59	135	59	320	745	321	746	425
KP_F077-KP_R039	Bacteria	C3-C6	75.78	169090	54053	81.79	629	140	345	925	348	935	580	C3-C6	0.14	4	2838	1.03	2	192	320	868	323	871	547
KP_F077-KP_R040	Bacteria	C3-C6	91.35	203835	19308	87.39	672	97	343	925	335	935	581	-	0	0	2842	0	0	194	0	0	0	0	0
KP_F077-KP_R041	Bacteria	C3-C6	91.54	204276	18867	87.39	672	97	343	924	335	934	580	-	0	0	2842	0	0	194	0	0	0	0	0
KP_F077-OP_R010	Bacteria	C3-C5	93.29	208176	14967	93.89	722	47	343	805	348	814	461	C3-C5	51.9	1475	1367	69.59	135	59	320	745	321	746	425
KP_F077-OP_R014	Bacteria	C3-C5	93.29	208180	14963	93.89	722	47	343	805	348	814	461	C3-C5	51.9	1475	1367	69.59	135	59	320	745	321	746	425
KP_F077-OP_R020	Bacteria	C3-C5	93.63	208940	14203	94.15	724	45	343	804	348	813	460	C3-C5	52.01	1478	1364	70.62	137	57	320	744	321	745	424
KP_F077-OP_R032	Bacteria	C3-C5	93.79	209276	13867	93.89	722	47	343	801	348	810	457	C3-C5	52.04	1479	1363	70.62	137	57	320	741	321	742	421
KP_F077-OP_R036	Bacteria	C3-C5	93.38	208377	14766	94.02	723	46	343	805	348	814	461	C3-C5	51.9	1475	1367	69.59	135	59	320	745	321	746	425
KP_F077-OP_R048	Bacteria	C3-C5	93.2	207969	15174	93.89	722	47	343	805	348	814	461	C3-C5	51.9	1475	1367	69.59	135	59	320	745	321	746	425
KP_F077-OP_R050	Bacteria	C3-C6	91.41	203987	19156	88.3	679	90	343	925	335	935	581	C3-C6	0.14	4	2838	1.03	2	192	320	868	323	871	547
KP_F077-OP_R052	Bacteria	C3-C6	91.7	204612	18531	88.3	679	90	343	925	335	935	581	C3-C6	0.14	4	2838	1.03	2	192	320	868	323	871	547
KP_F077-OP_R066	Bacteria	C3-C5	90.14	201143	22000	85.31	656	113	343	804	348	814	461	C3-C5	0.21	6	2836	0.52	1	193	320	746	320	746	426
KP_F077-OP_R067	Bacteria	C3-C6	91.86	204977	18166	88.3	679	90	343	925	335	935	581	C3-C6	0.14	4	2838	1.03	2	192	320	868	323	871	547
KP_F077-OP_R070	Bacteria	C3-C5	96.62	215603	7540	95.58	735	34	343	803	335	813	460	C3-C5	52.01	1478	1364	70.62	137	57	320	744	321	745	424
KP_F077-OP_R073	Bacteria	C3-C6	96.23	214737	8406	94.8	729	40	343	892	335	903	549	C3-V5	50.39	1432	1410	64.43	125	69	320	837	321	838	517
KP_F077-OP_R079	Bacteria	C3-C5	93.3	208186	14957	85.83	660	109	343	802	335	813	460	C3-C5	0.21	6	2836	0.52	1	193	320	745	320	745	425
KP_F077-OP_R086	Bacteria	C3-C5	89.99	200799	22344	84.01	646	123	343	800	348	810	457	-	0	0	2842	0	0	194	0	0	0	0	0
KP_F077-OP_R088	Bacteria	C3-C5	89.91	200619	22524	84.27	648	121	343	804	348	814	461	C3-C5	0.21	6	2836	0.52	1	193	320	746	320	746	426
KP_F077-OP_R089	Bacteria	C3-C6	79.85	178181	44962	84.14	647	122	345	925	348	935	580	C3-C6	0.14	4	2838	1.03	2	192	320	868	323	871	547
KP_F077-OP_R108	Bacteria	C3-C6	75.71	168942	54201	80.88	622	147	345	925	348	935	580	-	0	0	2842	0	0	194	0	0	0	0	0
KP_F077-OP_R119	Bacteria	C3-C5	96.02	214264	8879	92.59	712	57	343	804	335	814	461	C3-C5	1.06	30	2812	2.06	4	190	315	737	313	734	422
KP_F077-OP_R139	Bacteria	C3-C5	89.55	199826	23317	83.75	644	125	343	804	348	814	461	-	0	0	2842	0	0	194	0	0	0	0	0
KP_F077-OP_R143	Bacteria	C3-C6	75.88	169331	53812	80.88	622	147	345	924	348	934	579	-	0	0	2842	0	0	194	0	0	0	0	0
KP_F077-OP_UI005	Bacteria	C3-C6	75.8	169147	53996	80.88	622	147	345	925	348	935	580	-	0	0	2842	0	0	194	0	0	0	0	0
KP_F078-KP_R039	Bacteria	C4-C6	72.57	161926	61217	84.01	646	123	514	926	522	935	412	V3-C6	0.14	4	2838	1.03	2	192	451	868	455	871	416
KP_F078-KP_R040	Bacteria	C4-C6	88.04	196452	26691	89.6	689	80	513	925	522	935	412	-	0	0	2842	0	0	194	0	0	0	0	0
KP_F078-KP_R041	Bacteria	C4-C6	88.23	196880	26263	89.6	689	80	513	924	522	934	411	-	0	0	2842	0	0	194	0	0	0	0	0
KP_F078-KP_R046	Bacteria	C4-C7	87.72	195733	27410	88.82	683	86	512	1062	522	1075	550	-	0	0	2842	0	0	194	0	0	0	0	0
KP_F078-KP_R050	Bacteria	C4-C7	89.78	200345	22798	91.94	707	62	512	1063	522	1075	550	V3-C6	9.22	262	2580	8.25	16	178	448	996	447	996	549
KP_F078-KP_R053	Bacteria	C4-C7	92.6	206621	16522	93.11	716	53	513	1076	522	1088	563	-	0	0	2842	0	0	194	0	0	0	0	0
KP_F078-KP_R054	Bacteria	C4-C7	84.01	187458	35685	90.12	693	76	513	1078	522	1090	565	-	0	0	2842	0	0	194	0	0	0	0	0
KP_F078-KP_R055	Bacteria	C4-C7	83.82	187050	36093	90.12	693	76	513	1079	522	1091	566	-	0	0	2842	0	0	194	0	0	0	0	0
KP_F078-KP_R074	Bacteria	C4-V7	93.41	208446	14697	95.45	734	35	513	1113	522	1125	600	V3-C7	50.32	1430	1412	59.79	116	78	450	1050	453	1049	600
KP_F078-OP_R030	Bacteria	C4-C7	92.84	207159	15984	95.58	735	34	513	1079	522	1091	566	-	0	0	2842	0	0	194	0	0	0	0	0
KP_F078-OP_R050	Bacteria	C4-C6	88.1	196600	26543	90.51	696	73	513	925	522	935	412	V3-C6	0.14	4	2838	1.03	2	192	451	868	455	871	416
KP_F078-OP_R052	Bacteria	C4-C6	88.38	197205	25938	90.51	696	73	513	925	522	935	412	V3-C6	0.14	4	2838	1.03	2	192	451	868	455	871	416
KP_F078-OP_R067	Bacteria	C4-C6	88.54	197563	25580	90.51	696	73	513	925	522	935	412	V3-C6	0.14	4	2838	1.03	2	192	451	868	455	871	416
KP_F078-OP_R073	Bacteria	C4-C6	92.5	206403	16740	95.71	736	33	513	893	522	903	380	V3-V5	49.89	1418	1424	57.22	111	83	450	835	453	838	385
KP_F078-OP_R089	Bacteria	C4-C6	76.61	170947	52196	86.48	665	104	513	925	522	935	412	V3-C6	0.14	4	2838	1.03	2	192	451	868	455	871	416
KP_F078-OP_R108	Bacteria	C4-C6	72.5	161782	61361	83.09	639	130	514	926	522	935	412	-	0	0	2842	0	0	194	0	0	0	0	0
KP_F078-OP_R143	Bacteria	C4-C6	72.67	162159	60984	83.09	639	130	514	925	522	934	411	-	0	0	2842	0	0	194	0	0	0	0	0
KP_F078-OP_UI005	Bacteria	C4-C6	72.59	161977	61166	83.09	639	130	514	926	522	935	412	-	0	0	2842	0	0	194	0	0	0	0	0
KP_F078-OP_UI009	Bacteria	C4-C7	87.02	194173	28970	87.52	673	96	512	1073	522	1085	560	-	0	0	2842	0	0	194	0	0	0	0	0
KP_F079-KP_R039	Bacteria	C4-C6	72.36	161470	61673	78.41	603	166	518	926	526	935	408	V3-C6	0.04	1	2841	0.52	1	193	445	858	445	858	413
KP_F079-KP_R040	Bacteria	C4-C6	87.86	196044	27099	84.01	646	123	517	925	526	935	408	-	0	0	2842	0	0	194	0	0	0	0	0
KP_F079-KP_R041	Bacteria	C4-C6	88.05	196472	26671	84.01	646	123	517	924	526	934	407	-	0	0	2842	0	0	194	0	0	0	0	0
KP_F079-KP_R046	Bacteria	C4-C7	87.53	195316	27827	83.22	640	129	516	1062	526	1075	546	-	0	0	2842	0	0	194	0	0	0	0	0
KP_F079-KP_R050	Bacteria	C4-C7	89.6	199936	23207	86.35	664	105	516	1062	526	1075	546	V3-V6	1.83	52	2790	5.15	10	184	453	997	462	1006	544
KP_F079-KP_R053	Bacteria	C4-C7	92.42	206220	16923	87.39	672	97	517	1076	526	1088	559	V3-V6	0.6	17	2825	3.61	7	187	682	1285	461	1018	603
KP_F079-KP_R054	Bacteria	C4-C7	83.82	187044	36099	84.4	649	120	517	1078	526	1090	562	V3-V6	0.6	17	2825	3.61	7	187	682	1287	461	1020	605
KP_F079-KP_R055	Bacteria	C4-C7	83.64	186635	36508	84.4	649	120	517	1079	526	1091	563	V3-V6	0.6	17	2825	3.61	7	187	682	1288	461	1021	606
KP_F079-KP_R056	Bacteria	C4-V7	88.07	196528	26615	75.03	577	192	517	1113	526	1125	597	-	0	0	2842	0	0	194	0	0	0	0	0
KP_F079-KP_R057	Bacteria	C4-V7	84.9	189458	33685	73.99	569	200	517	1113	526	1125	597	-	0	0	2842	0	0	194	0	0	0	0	0
KP_F079-KP_R074	Bacteria	C4-V7	93.23	208041	15102	89.73	690	79	517	1113	526	1125	596	V3-C7	40.15	1141	1701	52.06	101	93	468	1067	458	1056	599
KP_F079-OP_R026	Bacteria	C4-V7	84.55	188673	34470	72.43	557	212	517	1113	526	1125	597	-	0	0	2842	0	0	194	0	0	0	0	0
KP_F079-OP_R030	Bacteria	C4-C7	92.66	206764	16379	89.86	691	78	517	1079	526	1091	562	V3-V6	0.6	17	2825	3.61	7	187	682	1288	461	1021	606
KP_F079-OP_R050	Bacteria	C4-C6	87.92	196192	26951	84.92	653	116	517	925	526	935	408	V3-C6	0.04	1	2841	0.52	1	193	445	858	445	858	413
KP_F079-OP_R052	Bacteria	C4-C6	88.19	196797	26346	84.92	653	116	517	925	526	935	408	V3-C6	0.04	1	2841	0.52	1	193	445	858	445	858	413
KP_F079-OP_R067	Bacteria	C4-C6	88.35	197156	25987	84.92	653	116	517	925	526	935	408	V3-C6	0.04	1	2841	0.52	1	193	445	858	445	858	413
KP_F079-OP_R073	Bacteria	C4-C6	92.32	206005	17138	90.12	693	76	517	893	526	903	376	V3-V5	41.31	1174	1668	55.15	107	87	468	850	458	839	382
KP_F079-OP_R089	Bacteria	C4-C6	76.41	170507	52636	80.88	622	147	517	925	526	935	408	V3-C6	0.04	1	2841	0.52	1	193	445	858	445	858	413
KP_F079-OP_R108	Bacteria	C4-C6	72.3	161326	61817	77.5	596	173	518	926	526	935	408	-	0	0	2842	0	0	194	0	0	0	0	0
KP_F079-OP_R143	Bacteria	C4-C6	72.47	161703	61440	77.5	596	173	518	925	526	934	407	-	0	0	2842	0	0	194	0	0	0	0	0
KP_F079-OP_UI005	Bacteria	C4-C6	72.38	161520	61623	77.5	596	173	518	926	526	935	408	-	0	0	2842	0	0	194	0	0	0	0	0
KP_F079-OP_UI009	Bacteria	C4-C7	86.83	193760	29383	81.92	630	139	516	1073	526	1085	556	-	0	0	2842	0	0	194	0	0	0	0	0
KP_F085-KP_R077	Bacteria	C7-C9	28.39	63344	159799	92.72	713	56	1101	1408	1107	1414	308	V6-C9	0.11	3	2839	0.52	1	193	1039	1355	1039	1356	316
OP_F009-KP_R056	Bacteria	C5-V7	88.2	196805	26338	80.49	619	150	783	1113	792	1125	331	-	0	0	2842	0	0	194	0	0	0	0	0
OP_F009-KP_R057	Bacteria	C5-V7	85.36	190469	32674	81.14	624	145	783	1113	792	1125	331	-	0	0	2842	0	0	194	0	0	0	0	0
OP_F009-OP_R026	Bacteria	C5-V7	84.69	188979	34164	77.89	599	170	783	1113	792	1125	331	-	0	0	2842	0	0	194	0	0	0	0	0
OP_F009-OP_R029	Bacteria	C5-C8	90.33	201564	21579	88.3	679	90	783	1193	792	1204	410	-	0	0	2842	0	0	194	0	0	0	0	0
OP_F014-KP_R039	Bacteria	C4-C6	72.61	162023	61120	84.01	646	123	514	926	522	935	412	V3-C6	0.14	4	2838	1.03	2	192	451	868	455	871	416
OP_F014-KP_R040	Bacteria	C4-C6	88.09	196561	26582	89.6	689	80	513	925	522	935	412	-	0	0	2842	0	0	194	0	0	0	0	0
OP_F014-KP_R041	Bacteria	C4-C6	88.28	196989	26154	89.6	689	80	513	924	522	934	411	-	0	0	2842	0	0	194	0	0	0	0	0
OP_F014-KP_R046	Bacteria	C4-C7	87.76	195838	27305	88.82	683	86	512	1062	522	1075	550	V3-C6	0.14	4	2838	2.06	4	190	446	994	446	994	548
OP_F014-KP_R050	Bacteria	C4-C7	89.83	200450	22693	91.94	707	62	512	1062	522	1075	550	V3-C6	26.67	758	2084	11.34	22	172	446	994	446	994	548
OP_F014-KP_R053	Bacteria	C4-C7	92.64	206729	16414	93.11	716	53	513	1076	522	1088	563	V3-V6	0.6	17	2825	3.61	7	187	678	1285	457	1018	607
OP_F014-KP_R054	Bacteria	C4-C7	84.05	187562	35581	90.12	693	76	513	1078	522	1090	565	V3-V6	0.6	17	2825	3.61	7	187	678	1287	457	1020	609
OP_F014-KP_R055	Bacteria	C4-C7	83.87	187153	35990	90.12	693	76	513	1079	522	1091	566	V3-V6	0.6	17	2825	3.61	7	187	678	1288	457	1021	610
OP_F014-OP_R030	Bacteria	C4-C7	92.89	207268	15875	95.58	735	34	513	1079	522	1091	566	V3-V6	0.6	17	2825	3.61	7	187	678	1288	457	1021	610
OP_F014-OP_R050	Bacteria	C4-C6	88.15	196709	26434	90.51	696	73	513	925	522	935	412	V3-C6	0.14	4	2838	1.03	2	192	451	868	455	871	416
OP_F014-OP_R052	Bacteria	C4-C6	88.42	197314	25829	90.51	696	73	513	925	522	935	412	V3-C6	0.14	4	2838	1.03	2	192	451	868	455	871	416
OP_F014-OP_R067	Bacteria	C4-C6	88.58	197672	25471	90.51	696	73	513	925	522	935	412	V3-C6	0.14	4	2838	1.03	2	192	451	868	455	871	416
OP_F014-OP_R089	Bacteria	C4-C6	76.65	171047	52096	86.48	665	104	513	925	522	935	412	V3-C6	0.14	4	2838	1.03	2	192	451	868	455	871	416
OP_F014-OP_R108	Bacteria	C4-C6	72.54	161879	61264	83.09	639	130	514	926	522	935	412	-	0	0	2842	0	0	194	0	0	0	0	0
OP_F014-OP_R143	Bacteria	C4-C6	72.71	162256	60887	83.09	639	130	514	925	522	934	411	-	0	0	2842	0	0	194	0	0	0	0	0
OP_F014-OP_UI005	Bacteria	C4-C6	72.63	162074	61069	83.09	639	130	514	926	522	935	412	-	0	0	2842	0	0	194	0	0	0	0	0
OP_F014-OP_UI009	Bacteria	C4-C7	87.06	194276	28867	87.52	673	96	512	1073	522	1085	560	-	0	0	2842	0	0	194	0	0	0	0	0
OP_F021-KP_R039	Bacteria	C4-C6	75.88	169319	53824	85.18	655	114	513	925	522	935	412	V3-C6	0.14	4	2838	1.03	2	192	451	868	455	871	416
OP_F021-KP_R040	Bacteria	C4-C6	91.41	203968	19175	90.77	698	71	513	925	522	935	412	-	0	0	2842	0	0	194	0	0	0	0	0
OP_F021-KP_R041	Bacteria	C4-C6	91.6	204409	18734	90.77	698	71	513	924	522	934	411	-	0	0	2842	0	0	194	0	0	0	0	0
OP_F021-KP_R046	Bacteria	C4-C7	91.02	203112	20031	90.12	693	76	511	1062	522	1075	550	-	0	0	2842	0	0	194	0	0	0	0	0
OP_F021-KP_R050	Bacteria	C4-C7	93.42	208451	14692	94.93	730	39	511	1062	522	1075	550	V3-C6	9.22	262	2580	8.25	16	178	448	996	447	996	549
OP_F021-KP_R053	Bacteria	C4-C7	96.38	215064	8079	96.23	740	29	512	1076	522	1088	563	-	0	0	2842	0	0	194	0	0	0	0	0
OP_F021-KP_R054	Bacteria	C4-C7	87.76	195839	27304	93.24	717	52	512	1078	522	1090	566	-	0	0	2842	0	0	194	0	0	0	0	0
OP_F021-KP_R055	Bacteria	C4-C7	87.57	195416	27727	93.24	717	52	512	1079	522	1091	567	-	0	0	2842	0	0	194	0	0	0	0	0
OP_F021-KP_R074	Bacteria	C4-V7	97.2	216898	6245	98.57	758	11	512	1112	522	1125	600	V3-C7	50.6	1438	1404	59.79	116	78	450	1050	453	1049	600
OP_F021-OP_R030	Bacteria	C4-C7	96.61	215584	7559	98.7	759	10	512	1079	522	1091	566	-	0	0	2842	0	0	194	0	0	0	0	0
OP_F021-OP_R050	Bacteria	C4-C6	91.47	204120	19023	91.68	705	64	513	925	522	935	412	V3-C6	0.14	4	2838	1.03	2	192	451	868	455	871	416
OP_F021-OP_R052	Bacteria	C4-C6	91.75	204745	18398	91.68	705	64	513	925	522	935	412	V3-C6	0.14	4	2838	1.03	2	192	451	868	455	871	416
OP_F021-OP_R067	Bacteria	C4-C6	91.92	205114	18029	91.68	705	64	513	925	522	935	412	V3-C6	0.14	4	2838	1.03	2	192	451	868	455	871	416
OP_F021-OP_R073	Bacteria	C4-C6	96.29	214861	8282	98.83	760	9	512	892	522	903	380	V3-V5	50.18	1426	1416	57.22	111	83	450	835	453	838	385
OP_F021-OP_R089	Bacteria	C4-C6	79.94	178372	44771	87.65	674	95	512	925	522	935	412	V3-C6	0.14	4	2838	1.03	2	192	451	868	455	871	416
OP_F021-OP_R108	Bacteria	C4-C6	75.81	169171	53972	84.27	648	121	513	925	522	935	412	-	0	0	2842	0	0	194	0	0	0	0	0
OP_F021-OP_R143	Bacteria	C4-C6	75.99	169561	53582	84.27	648	121	513	924	522	934	411	-	0	0	2842	0	0	194	0	0	0	0	0
OP_F021-OP_UI005	Bacteria	C4-C6	75.9	169375	53768	84.27	648	121	513	925	522	935	412	-	0	0	2842	0	0	194	0	0	0	0	0
OP_F021-OP_UI009	Bacteria	C4-C7	90.32	201535	21608	88.95	684	85	512	1072	522	1085	560	-	0	0	2842	0	0	194	0	0	0	0	0
OP_F025-KP_R002	Bacteria	C1-C4	10.61	23669	199474	73.73	567	202	11	535	11	541	525	-	0	0	2842	0	0	194	0	0	0	0	0
OP_F025-KP_R018	Bacteria	C1-C3	10.67	23813	199330	73.6	566	203	11	361	11	363	350	-	0	0	2842	0	0	194	0	0	0	0	0
OP_F025-KP_R020	Bacteria	C1-C3	10.72	23928	199215	75.03	577	192	11	362	11	364	351	-	0	0	2842	0	0	194	0	0	0	0	0
OP_F025-KP_R021	Bacteria	C1-C4	10.58	23617	199526	73.6	566	203	11	535	11	541	525	-	0	0	2842	0	0	194	0	0	0	0	0
OP_F025-KP_R022	Bacteria	C1-C4	10.47	23371	199772	70.22	540	229	11	536	11	542	526	-	0	0	2842	0	0	194	0	0	0	0	0
OP_F025-KP_R023	Bacteria	C1-C4	10.48	23378	199765	70.22	540	229	11	536	11	542	526	-	0	0	2842	0	0	194	0	0	0	0	0
OP_F025-KP_R025	Bacteria	C1-C4	10.48	23387	199756	70.48	542	227	11	536	11	542	526	-	0	0	2842	0	0	194	0	0	0	0	0
OP_F025-KP_R070	Bacteria	C1-C4	10.48	23375	199768	70.09	539	230	11	538	11	544	528	-	0	0	2842	0	0	194	0	0	0	0	0
OP_F025-KP_R071	Bacteria	C1-C4	10.72	23912	199231	76.33	587	182	11	533	11	539	522	-	0	0	2842	0	0	194	0	0	0	0	0
OP_F025-OP_R019	Bacteria	C1-C4	10.03	22386	200757	71.39	549	220	11	536	11	541	525	-	0	0	2842	0	0	194	0	0	0	0	0
OP_F025-OP_R028	Bacteria	C1-C3	10.57	23590	199553	70.48	542	227	11	366	11	368	355	-	0	0	2842	0	0	194	0	0	0	0	0
OP_F025-OP_R038	Bacteria	C1-C4	10.59	23626	199517	73.6	566	203	11	534	11	540	524	-	0	0	2842	0	0	194	0	0	0	0	0
OP_F025-OP_R040	Bacteria	C1-C4	10.7	23873	199270	76.2	586	183	11	533	11	539	522	-	0	0	2842	0	0	194	0	0	0	0	0
OP_F025-OP_R043	Bacteria	C1-C4	10.74	23964	199179	76.46	588	181	11	532	11	538	521	-	0	0	2842	0	0	194	0	0	0	0	0
OP_F025-OP_R045	Bacteria	C1-C4	10.48	23396	199747	70.22	540	229	11	536	11	542	526	-	0	0	2842	0	0	194	0	0	0	0	0
OP_F025-OP_R047	Bacteria	C1-C4	10.03	22379	200764	71.39	549	220	11	536	11	541	525	-	0	0	2842	0	0	194	0	0	0	0	0
OP_F025-OP_R051	Bacteria	C1-C4	10.45	23326	199817	69.96	538	231	11	538	11	544	528	-	0	0	2842	0	0	194	0	0	0	0	0
OP_F025-OP_R054	Bacteria	C1-C3	10.68	23835	199308	73.6	566	203	11	360	11	362	349	-	0	0	2842	0	0	194	0	0	0	0	0
OP_F025-OP_R100	Bacteria	C1-C4	10.46	23341	199802	70.09	539	230	11	537	11	543	527	-	0	0	2842	0	0	194	0	0	0	0	0
OP_F025-OP_R102	Bacteria	C1-C4	10.6	23658	199485	73.6	566	203	11	538	11	544	528	-	0	0	2842	0	0	194	0	0	0	0	0
OP_F025-OP_R115	Bacteria	C1-C4	10.47	23368	199775	70.09	539	230	11	538	11	544	528	-	0	0	2842	0	0	194	0	0	0	0	0
OP_F025-OP_R116	Bacteria	C1-C3	10.68	23835	199308	73.6	566	203	11	360	11	362	349	-	0	0	2842	0	0	194	0	0	0	0	0
OP_F025-OP_R146	Bacteria	C1-C4	10.71	23905	199238	76.33	587	182	11	533	11	539	522	-	0	0	2842	0	0	194	0	0	0	0	0
OP_F028-KP_R060	Bacteria	C7-C9	29.08	64887	158256	75.81	583	186	1101	1409	1099	1414	309	-	0	0	2842	0	0	194	0	0	0	0	0
OP_F028-KP_R061	Bacteria	C7-C9	28.53	63668	159475	75.42	580	189	1101	1409	1099	1414	309	-	0	0	2842	0	0	194	0	0	0	0	0
OP_F028-KP_R062	Bacteria	C7-C9	28.57	63758	159385	75.42	580	189	1101	1409	1099	1414	309	-	0	0	2842	0	0	194	0	0	0	0	0
OP_F028-KP_R063	Bacteria	C7-C10	4.62	10314	212829	64.24	494	275	1098	1506	1094	1514	408	-	0	0	2842	0	0	194	0	0	0	0	0
OP_F028-KP_R066	Bacteria	C7-C10	4.42	9860	213283	63.59	489	280	1098	1507	1094	1515	409	-	0	0	2842	0	0	194	0	0	0	0	0
OP_F028-KP_R075	Bacteria	C7-C9	28.44	63471	159672	75.42	580	189	1101	1408	1106	1413	308	-	0	0	2842	0	0	194	0	0	0	0	0
OP_F028-KP_R076	Bacteria	C7-C9	29	64705	158438	75.81	583	186	1101	1408	1099	1413	308	-	0	0	2842	0	0	194	0	0	0	0	0
OP_F028-KP_R077	Bacteria	C7-C9	25.12	56057	167086	74.9	576	193	1101	1409	1106	1414	308	-	0	0	2842	0	0	194	0	0	0	0	0
OP_F028-KP_R078	Bacteria	C7-C9	28.7	64045	159098	75.42	580	189	1101	1408	1099	1413	308	-	0	0	2842	0	0	194	0	0	0	0	0
OP_F028-OP_R121	Bacteria	C7-C9	29.26	65292	157851	75.81	583	186	1101	1408	1099	1413	308	-	0	0	2842	0	0	194	0	0	0	0	0
OP_F030-KP_R039	Bacteria	C4-C6	72.56	161907	61236	84.01	646	123	514	926	522	935	412	-	0	0	2842	0	0	194	0	0	0	0	0
OP_F030-KP_R040	Bacteria	C4-C6	88.03	196430	26713	89.6	689	80	513	925	522	935	412	-	0	0	2842	0	0	194	0	0	0	0	0
OP_F030-KP_R041	Bacteria	C4-C6	88.22	196858	26285	89.6	689	80	513	924	522	934	411	-	0	0	2842	0	0	194	0	0	0	0	0
OP_F030-KP_R046	Bacteria	C4-C7	87.71	195711	27432	88.82	683	86	512	1062	522	1075	550	-	0	0	2842	0	0	194	0	0	0	0	0
OP_F030-KP_R050	Bacteria	C4-C7	89.77	200323	22820	91.94	707	62	512	1063	522	1075	550	V3-V6	1.72	49	2793	3.61	7	187	447	995	458	1006	548
OP_F030-KP_R053	Bacteria	C4-C7	92.59	206599	16544	93.11	716	53	513	1076	522	1088	563	-	0	0	2842	0	0	194	0	0	0	0	0
OP_F030-KP_R054	Bacteria	C4-C7	84	187437	35706	90.12	693	76	513	1078	522	1090	565	-	0	0	2842	0	0	194	0	0	0	0	0
OP_F030-KP_R055	Bacteria	C4-C7	83.82	187029	36114	90.12	693	76	513	1079	522	1091	566	-	0	0	2842	0	0	194	0	0	0	0	0
OP_F030-KP_R074	Bacteria	C4-V7	93.4	208424	14719	95.45	734	35	513	1113	522	1125	600	V3-V6	3.24	92	2750	9.79	19	175	445	1043	442	1040	598
OP_F030-OP_R030	Bacteria	C4-C7	92.83	207137	16006	95.58	735	34	513	1079	522	1091	566	-	0	0	2842	0	0	194	0	0	0	0	0
OP_F030-OP_R050	Bacteria	C4-C6	88.09	196578	26565	90.51	696	73	513	925	522	935	412	-	0	0	2842	0	0	194	0	0	0	0	0
OP_F030-OP_R052	Bacteria	C4-C6	88.37	197183	25960	90.51	696	73	513	925	522	935	412	-	0	0	2842	0	0	194	0	0	0	0	0
OP_F030-OP_R067	Bacteria	C4-C6	88.53	197541	25602	90.51	696	73	513	925	522	935	412	-	0	0	2842	0	0	194	0	0	0	0	0
OP_F030-OP_R073	Bacteria	C4-C6	92.49	206381	16762	95.71	736	33	513	893	522	903	380	V3-C5	3.24	92	2750	9.79	19	175	445	829	442	826	384
OP_F030-OP_R089	Bacteria	C4-C6	76.6	170928	52215	86.48	665	104	513	925	522	935	412	-	0	0	2842	0	0	194	0	0	0	0	0
OP_F030-OP_R108	Bacteria	C4-C6	72.49	161763	61380	83.09	639	130	514	926	522	935	412	-	0	0	2842	0	0	194	0	0	0	0	0
OP_F030-OP_R143	Bacteria	C4-C6	72.66	162140	61003	83.09	639	130	514	925	522	934	411	-	0	0	2842	0	0	194	0	0	0	0	0
OP_F030-OP_UI005	Bacteria	C4-C6	72.58	161958	61185	83.09	639	130	514	926	522	935	412	-	0	0	2842	0	0	194	0	0	0	0	0
OP_F030-OP_UI009	Bacteria	C4-C7	87.01	194151	28992	87.52	673	96	512	1073	522	1085	560	-	0	0	2842	0	0	194	0	0	0	0	0
OP_F032-KP_R002	Bacteria	C1-C4	19.11	42641	180502	78.8	606	163	11	534	11	534	523	-	0	0	2842	0	0	194	0	0	0	0	0
OP_F032-KP_R018	Bacteria	C1-C3	19.24	42932	180211	78.67	605	164	11	360	11	357	349	-	0	0	2842	0	0	194	0	0	0	0	0
OP_F032-KP_R020	Bacteria	C1-C3	19.34	43165	179978	80.1	616	153	11	361	11	358	350	-	0	0	2842	0	0	194	0	0	0	0	0
OP_F032-KP_R021	Bacteria	C1-C4	19.06	42535	180608	78.67	605	164	11	534	11	534	523	-	0	0	2842	0	0	194	0	0	0	0	0
OP_F032-KP_R022	Bacteria	C1-C4	18.85	42069	181074	75.03	577	192	11	535	11	535	524	-	0	0	2842	0	0	194	0	0	0	0	0
OP_F032-KP_R023	Bacteria	C1-C4	18.86	42091	181052	75.03	577	192	11	535	11	535	524	-	0	0	2842	0	0	194	0	0	0	0	0
OP_F032-KP_R025	Bacteria	C1-C4	18.87	42102	181041	75.29	579	190	11	535	11	535	524	-	0	0	2842	0	0	194	0	0	0	0	0
OP_F032-KP_R070	Bacteria	C1-C4	18.86	42076	181067	74.9	576	193	11	537	11	537	526	-	0	0	2842	0	0	194	0	0	0	0	0
OP_F032-KP_R071	Bacteria	C1-C4	19.37	43213	179930	81.66	628	141	11	531	11	532	521	-	0	0	2842	0	0	194	0	0	0	0	0
OP_F032-OP_R019	Bacteria	C1-C4	18.05	40286	182857	76.46	588	181	11	534	11	534	523	-	0	0	2842	0	0	194	0	0	0	0	0
OP_F032-OP_R028	Bacteria	C1-C3	19.04	42488	180655	75.03	577	192	11	365	11	362	354	-	0	0	2842	0	0	194	0	0	0	0	0
OP_F032-OP_R038	Bacteria	C1-C4	19.07	42550	180593	78.67	605	164	11	533	11	533	522	-	0	0	2842	0	0	194	0	0	0	0	0
OP_F032-OP_R040	Bacteria	C1-C4	19.33	43144	179999	81.53	627	142	11	531	11	532	521	-	0	0	2842	0	0	194	0	0	0	0	0
OP_F032-OP_R043	Bacteria	C1-C4	19.38	43255	179888	81.79	629	140	11	530	11	531	520	-	0	0	2842	0	0	194	0	0	0	0	0
OP_F032-OP_R045	Bacteria	C1-C4	18.88	42119	181024	75.03	577	192	11	535	11	535	524	-	0	0	2842	0	0	194	0	0	0	0	0
OP_F032-OP_R047	Bacteria	C1-C4	18.05	40278	182865	76.46	588	181	11	534	11	534	523	-	0	0	2842	0	0	194	0	0	0	0	0
OP_F032-OP_R051	Bacteria	C1-C4	18.81	41976	181167	74.77	575	194	11	537	11	537	526	-	0	0	2842	0	0	194	0	0	0	0	0
OP_F032-OP_R054	Bacteria	C1-C3	19.26	42976	180167	78.67	605	164	11	359	11	356	348	-	0	0	2842	0	0	194	0	0	0	0	0
OP_F032-OP_R100	Bacteria	C1-C4	18.82	42005	181138	74.9	576	193	11	536	11	536	525	-	0	0	2842	0	0	194	0	0	0	0	0
OP_F032-OP_R102	Bacteria	C1-C4	19.1	42620	180523	78.67	605	164	11	537	11	537	526	-	0	0	2842	0	0	194	0	0	0	0	0
OP_F032-OP_R115	Bacteria	C1-C4	18.85	42068	181075	74.9	576	193	11	537	11	537	526	-	0	0	2842	0	0	194	0	0	0	0	0
OP_F032-OP_R116	Bacteria	C1-C3	19.26	42979	180164	78.67	605	164	11	359	11	356	348	-	0	0	2842	0	0	194	0	0	0	0	0
OP_F032-OP_R146	Bacteria	C1-C4	19.36	43205	179938	81.66	628	141	11	531	11	532	521	-	0	0	2842	0	0	194	0	0	0	0	0
OP_F033-KP_R039	Bacteria	C4-C6	70.1	156420	66723	69.31	533	236	559	925	568	935	366	-	0	0	2842	0	0	194	0	0	0	0	0
OP_F033-KP_R040	Bacteria	C4-C6	85.55	190905	32238	74.9	576	193	559	925	568	935	366	-	0	0	2842	0	0	194	0	0	0	0	0
OP_F033-KP_R041	Bacteria	C4-C6	85.73	191308	31835	74.9	576	193	559	924	568	934	365	-	0	0	2842	0	0	194	0	0	0	0	0
OP_F033-KP_R046	Bacteria	C4-C7	85.1	189886	33257	74.12	570	199	557	1062	568	1075	505	-	0	0	2842	0	0	194	0	0	0	0	0
OP_F033-KP_R050	Bacteria	C4-C7	87.47	195181	27962	78.93	607	162	557	1062	568	1075	505	-	0	0	2842	0	0	194	0	0	0	0	0
OP_F033-KP_R053	Bacteria	C4-C7	90.44	201820	21323	80.36	618	151	558	1076	568	1088	518	-	0	0	2842	0	0	194	0	0	0	0	0
OP_F033-KP_R054	Bacteria	C4-C7	81.87	182687	40456	77.37	595	174	558	1078	568	1090	520	-	0	0	2842	0	0	194	0	0	0	0	0
OP_F033-KP_R055	Bacteria	C4-C7	81.69	182292	40851	77.37	595	174	558	1079	568	1091	521	-	0	0	2842	0	0	194	0	0	0	0	0
OP_F033-KP_R056	Bacteria	C4-V7	90.08	201005	22138	79.06	608	161	558	1113	568	1125	555	-	0	0	2842	0	0	194	0	0	0	0	0
OP_F033-KP_R057	Bacteria	C4-V7	87.26	194717	28426	79.97	615	154	558	1113	568	1125	555	-	0	0	2842	0	0	194	0	0	0	0	0
OP_F033-KP_R074	Bacteria	C4-V7	91.21	203526	19617	82.7	636	133	558	1113	568	1125	555	-	0	0	2842	0	0	194	0	0	0	0	0
OP_F033-OP_R026	Bacteria	C4-V7	86.57	193186	29957	77.76	598	171	558	1113	568	1125	555	-	0	0	2842	0	0	194	0	0	0	0	0
OP_F033-OP_R030	Bacteria	C4-C7	90.67	202320	20823	82.57	635	134	558	1079	568	1091	521	-	0	0	2842	0	0	194	0	0	0	0	0
OP_F033-OP_R050	Bacteria	C4-C6	85.62	191050	32093	75.81	583	186	559	925	568	935	366	-	0	0	2842	0	0	194	0	0	0	0	0
OP_F033-OP_R052	Bacteria	C4-C6	85.87	191612	31531	75.81	583	186	559	925	568	935	366	-	0	0	2842	0	0	194	0	0	0	0	0
OP_F033-OP_R067	Bacteria	C4-C6	86.02	191947	31196	75.81	583	186	559	925	568	935	366	-	0	0	2842	0	0	194	0	0	0	0	0
OP_F033-OP_R073	Bacteria	C4-C6	90.28	201451	21692	82.31	633	136	558	892	568	903	334	-	0	0	2842	0	0	194	0	0	0	0	0
OP_F033-OP_R089	Bacteria	C4-C6	74.16	165484	57659	71.91	553	216	558	925	568	935	366	-	0	0	2842	0	0	194	0	0	0	0	0
OP_F033-OP_R108	Bacteria	C4-C6	70.04	156279	66864	68.4	526	243	559	925	568	935	366	-	0	0	2842	0	0	194	0	0	0	0	0
OP_F033-OP_R143	Bacteria	C4-C6	70.19	156630	66513	68.4	526	243	559	924	568	934	365	-	0	0	2842	0	0	194	0	0	0	0	0
OP_F033-OP_UI005	Bacteria	C4-C6	70.12	156460	66683	68.4	526	243	559	925	568	935	366	-	0	0	2842	0	0	194	0	0	0	0	0
OP_F033-OP_UI009	Bacteria	C4-C7	84.43	188391	34752	73.08	562	207	557	1072	568	1085	515	-	0	0	2842	0	0	194	0	0	0	0	0
OP_F043-KP_R029	Bacteria	C3-C5	89.46	199623	23520	83.75	644	125	343	804	348	814	461	-	0	0	2842	0	0	194	0	0	0	0	0
OP_F043-KP_R030	Bacteria	C3-C5	90.79	202601	20542	85.05	654	115	343	796	348	806	453	-	0	0	2842	0	0	194	0	0	0	0	0
OP_F043-KP_R033	Bacteria	C3-C5	90.48	201892	21251	84.4	649	120	343	801	348	811	458	C3-C5	0.21	6	2836	0.52	1	193	320	743	320	743	423
OP_F043-KP_R034	Bacteria	C3-C5	93.29	208174	14969	91.42	703	66	343	802	348	811	458	C3-C5	1.13	32	2810	3.09	6	188	306	725	313	731	419
OP_F043-KP_R036	Bacteria	C3-C5	90.35	201615	21528	84.4	649	120	343	803	348	813	460	C3-C5	0.21	6	2836	0.52	1	193	320	745	320	745	425
OP_F043-KP_R037	Bacteria	C3-C5	90.03	200906	22237	84.27	648	121	343	804	348	814	461	C3-C5	0.21	6	2836	0.52	1	193	320	746	320	746	426
OP_F043-KP_R039	Bacteria	C3-C6	75.81	169159	53984	81.79	629	140	345	925	348	935	580	C3-C6	0.14	4	2838	1.03	2	192	320	868	323	871	547
OP_F043-KP_R040	Bacteria	C3-C6	91.38	203918	19225	87.39	672	97	343	925	335	935	581	-	0	0	2842	0	0	194	0	0	0	0	0
OP_F043-KP_R041	Bacteria	C3-C6	91.58	204359	18784	87.39	672	97	343	924	335	934	580	-	0	0	2842	0	0	194	0	0	0	0	0
OP_F043-OP_R050	Bacteria	C3-C6	91.45	204070	19073	88.3	679	90	343	925	335	935	581	C3-C6	0.14	4	2838	1.03	2	192	320	868	323	871	547
OP_F043-OP_R052	Bacteria	C3-C6	91.73	204696	18447	88.3	679	90	343	925	335	935	581	C3-C6	0.14	4	2838	1.03	2	192	320	868	323	871	547
OP_F043-OP_R066	Bacteria	C3-C5	90.18	201231	21912	85.31	656	113	343	804	348	814	461	C3-C5	0.21	6	2836	0.52	1	193	320	746	320	746	426
OP_F043-OP_R067	Bacteria	C3-C6	91.9	205063	18080	88.3	679	90	343	925	335	935	581	C3-C6	0.14	4	2838	1.03	2	192	320	868	323	871	547
OP_F043-OP_R079	Bacteria	C3-C5	93.34	208279	14864	85.83	660	109	343	802	335	813	460	C3-C5	0.21	6	2836	0.52	1	193	320	745	320	745	425
OP_F043-OP_R086	Bacteria	C3-C5	90.03	200887	22256	84.01	646	123	343	800	348	810	457	-	0	0	2842	0	0	194	0	0	0	0	0
OP_F043-OP_R088	Bacteria	C3-C5	89.95	200707	22436	84.27	648	121	343	804	348	814	461	C3-C5	0.21	6	2836	0.52	1	193	320	746	320	746	426
OP_F043-OP_R089	Bacteria	C3-C6	79.88	178257	44886	84.14	647	122	345	925	348	935	580	C3-C6	0.14	4	2838	1.03	2	192	320	868	323	871	547
OP_F043-OP_R108	Bacteria	C3-C6	75.74	169011	54132	80.88	622	147	345	925	348	935	580	-	0	0	2842	0	0	194	0	0	0	0	0
OP_F043-OP_R119	Bacteria	C3-C5	96.06	214359	8784	92.59	712	57	343	804	335	814	461	C3-C5	1.06	30	2812	2.06	4	190	315	737	313	734	422
OP_F043-OP_R139	Bacteria	C3-C5	89.59	199914	23229	83.75	644	125	343	804	348	814	461	-	0	0	2842	0	0	194	0	0	0	0	0
OP_F043-OP_R143	Bacteria	C3-C6	75.92	169400	53743	80.88	622	147	345	924	348	934	579	-	0	0	2842	0	0	194	0	0	0	0	0
OP_F043-OP_UI005	Bacteria	C3-C6	75.83	169216	53927	80.88	622	147	345	925	348	935	580	-	0	0	2842	0	0	194	0	0	0	0	0
OP_F046-KP_R029	Bacteria	C3-C5	88.37	197193	25950	75.29	579	190	343	804	348	814	461	-	0	0	2842	0	0	194	0	0	0	0	0
OP_F046-KP_R030	Bacteria	C3-C5	89.69	200141	23002	76.59	589	180	343	796	348	806	453	-	0	0	2842	0	0	194	0	0	0	0	0
OP_F046-KP_R031	Bacteria	C3-C5	95.78	213725	9418	87.26	671	98	343	800	335	810	457	C3-C5	0.39	11	2831	3.09	6	188	343	1158	338	757	815
OP_F046-KP_R032	Bacteria	C3-C5	92.72	206888	16255	85.83	660	109	343	801	348	810	457	C3-C5	0.39	11	2831	3.09	6	188	343	1158	338	757	815
OP_F046-KP_R033	Bacteria	C3-C5	89.38	199441	23702	75.94	584	185	343	801	348	811	458	-	0	0	2842	0	0	194	0	0	0	0	0
OP_F046-KP_R034	Bacteria	C3-C5	92.17	205663	17480	82.96	638	131	343	802	348	811	458	-	0	0	2842	0	0	194	0	0	0	0	0
OP_F046-KP_R035	Bacteria	C3-C5	92.45	206307	16836	85.7	659	110	343	804	348	813	460	C3-C5	0.39	11	2831	3.09	6	188	343	1161	338	760	818
OP_F046-KP_R036	Bacteria	C3-C5	89.26	199169	23974	75.94	584	185	343	803	348	813	460	-	0	0	2842	0	0	194	0	0	0	0	0
OP_F046-KP_R037	Bacteria	C3-C5	88.94	198462	24681	75.81	583	186	343	804	348	814	461	-	0	0	2842	0	0	194	0	0	0	0	0
OP_F046-KP_R038	Bacteria	C3-C5	92.21	205752	17391	85.44	657	112	343	805	348	814	461	C3-C5	0.39	11	2831	3.09	6	188	343	1162	338	761	819
OP_F046-KP_R039	Bacteria	C3-C6	74.77	166850	56293	73.34	564	205	345	925	348	935	580	-	0	0	2842	0	0	194	0	0	0	0	0
OP_F046-KP_R040	Bacteria	C3-C6	90.27	201433	21710	78.93	607	162	343	925	335	935	581	-	0	0	2842	0	0	194	0	0	0	0	0
OP_F046-KP_R041	Bacteria	C3-C6	90.47	201869	21274	78.93	607	162	343	924	335	934	580	-	0	0	2842	0	0	194	0	0	0	0	0
OP_F046-OP_R010	Bacteria	C3-C5	92.21	205757	17386	85.44	657	112	343	805	348	814	461	C3-C5	0.39	11	2831	3.09	6	188	343	1162	338	761	819
OP_F046-OP_R014	Bacteria	C3-C5	92.21	205761	17382	85.44	657	112	343	805	348	814	461	C3-C5	0.39	11	2831	3.09	6	188	343	1162	338	761	819
OP_F046-OP_R020	Bacteria	C3-C5	92.55	206519	16624	85.7	659	110	343	804	348	813	460	C3-C5	0.39	11	2831	3.09	6	188	343	1161	338	760	818
OP_F046-OP_R032	Bacteria	C3-C5	92.7	206848	16295	85.44	657	112	343	801	348	810	457	-	0	0	2842	0	0	194	0	0	0	0	0
OP_F046-OP_R036	Bacteria	C3-C5	92.3	205958	17185	85.57	658	111	343	805	348	814	461	C3-C5	0.39	11	2831	3.09	6	188	343	1162	338	761	819
OP_F046-OP_R048	Bacteria	C3-C5	92.12	205553	17590	85.44	657	112	343	805	348	814	461	C3-C5	0.39	11	2831	3.09	6	188	343	1162	338	761	819
OP_F046-OP_R050	Bacteria	C3-C6	90.34	201585	21558	79.84	614	155	343	925	335	935	581	-	0	0	2842	0	0	194	0	0	0	0	0
OP_F046-OP_R052	Bacteria	C3-C6	90.61	202201	20942	79.84	614	155	343	925	335	935	581	-	0	0	2842	0	0	194	0	0	0	0	0
OP_F046-OP_R066	Bacteria	C3-C5	89.08	198786	24357	76.85	591	178	343	804	348	814	461	-	0	0	2842	0	0	194	0	0	0	0	0
OP_F046-OP_R067	Bacteria	C3-C6	90.77	202558	20585	79.84	614	155	343	925	335	935	581	-	0	0	2842	0	0	194	0	0	0	0	0
OP_F046-OP_R070	Bacteria	C3-C5	95.51	213131	10012	87.13	670	99	343	803	335	813	460	C3-C5	0.39	11	2831	3.09	6	188	343	1161	338	760	818
OP_F046-OP_R073	Bacteria	C3-C6	95.12	212257	10886	86.35	664	105	343	892	335	903	549	C3-V5	0.39	11	2831	3.09	6	188	343	1254	338	853	911
OP_F046-OP_R079	Bacteria	C3-C5	92.22	205777	17366	77.37	595	174	343	802	335	813	460	-	0	0	2842	0	0	194	0	0	0	0	0
OP_F046-OP_R086	Bacteria	C3-C5	88.93	198446	24697	75.55	581	188	343	800	348	810	457	-	0	0	2842	0	0	194	0	0	0	0	0
OP_F046-OP_R088	Bacteria	C3-C5	88.85	198266	24877	75.81	583	186	343	804	348	814	461	-	0	0	2842	0	0	194	0	0	0	0	0
OP_F046-OP_R089	Bacteria	C3-C6	78.82	175883	47260	75.68	582	187	344	925	348	935	580	-	0	0	2842	0	0	194	0	0	0	0	0
OP_F046-OP_R108	Bacteria	C3-C6	74.71	166702	56441	72.43	557	212	345	925	348	935	580	-	0	0	2842	0	0	194	0	0	0	0	0
OP_F046-OP_R119	Bacteria	C3-C5	94.91	211795	11348	84.14	647	122	343	804	335	814	461	-	0	0	2842	0	0	194	0	0	0	0	0
OP_F046-OP_R139	Bacteria	C3-C5	88.5	197480	25663	75.29	579	190	343	804	348	814	461	-	0	0	2842	0	0	194	0	0	0	0	0
OP_F046-OP_R143	Bacteria	C3-C6	74.88	167087	56056	72.43	557	212	345	924	348	934	579	-	0	0	2842	0	0	194	0	0	0	0	0
OP_F046-OP_UI005	Bacteria	C3-C6	74.8	166905	56238	72.43	557	212	345	925	348	935	580	-	0	0	2842	0	0	194	0	0	0	0	0
OP_F048-KP_R029	Bacteria	C3-C5	88.95	198491	24652	83.75	644	125	340	804	345	814	464	-	0	0	2842	0	0	194	0	0	0	0	0
OP_F048-KP_R030	Bacteria	C3-C5	90.28	201457	21686	85.05	654	115	340	796	345	806	456	-	0	0	2842	0	0	194	0	0	0	0	0
OP_F048-KP_R031	Bacteria	C3-C5	96.39	215083	8060	95.71	736	33	340	800	332	810	460	-	0	0	2842	0	0	194	0	0	0	0	0
OP_F048-KP_R032	Bacteria	C3-C5	93.31	208222	14921	94.28	725	44	340	801	345	810	460	-	0	0	2842	0	0	194	0	0	0	0	0
OP_F048-KP_R033	Bacteria	C3-C5	89.96	200748	22395	84.4	649	120	340	801	345	811	461	-	0	0	2842	0	0	194	0	0	0	0	0
OP_F048-KP_R034	Bacteria	C3-C5	92.76	206992	16151	91.42	703	66	340	802	345	811	461	-	0	0	2842	0	0	194	0	0	0	0	0
OP_F048-KP_R035	Bacteria	C3-C5	93.05	207631	15512	94.15	724	45	340	804	345	813	463	-	0	0	2842	0	0	194	0	0	0	0	0
OP_F048-KP_R036	Bacteria	C3-C5	89.84	200470	22673	84.4	649	120	340	803	345	813	463	-	0	0	2842	0	0	194	0	0	0	0	0
OP_F048-KP_R037	Bacteria	C3-C5	89.52	199765	23378	84.27	648	121	340	804	345	814	464	-	0	0	2842	0	0	194	0	0	0	0	0
OP_F048-KP_R038	Bacteria	C3-C5	92.8	207081	16062	93.89	722	47	340	805	345	814	464	-	0	0	2842	0	0	194	0	0	0	0	0
OP_F048-KP_R039	Bacteria	C3-C6	75.36	168156	54987	81.79	629	140	342	925	345	935	583	-	0	0	2842	0	0	194	0	0	0	0	0
OP_F048-KP_R040	Bacteria	C3-C6	90.87	202765	20378	87.39	672	97	340	925	332	935	584	-	0	0	2842	0	0	194	0	0	0	0	0
OP_F048-KP_R041	Bacteria	C3-C6	91.06	203204	19939	87.39	672	97	340	924	332	934	583	-	0	0	2842	0	0	194	0	0	0	0	0
OP_F048-OP_R010	Bacteria	C3-C5	92.8	207086	16057	93.89	722	47	340	805	345	814	464	-	0	0	2842	0	0	194	0	0	0	0	0
OP_F048-OP_R014	Bacteria	C3-C5	92.81	207090	16053	93.89	722	47	340	805	345	814	464	-	0	0	2842	0	0	194	0	0	0	0	0
OP_F048-OP_R020	Bacteria	C3-C5	93.14	207845	15298	94.15	724	45	340	804	345	813	463	-	0	0	2842	0	0	194	0	0	0	0	0
OP_F048-OP_R032	Bacteria	C3-C5	93.29	208182	14961	93.89	722	47	340	801	345	810	460	-	0	0	2842	0	0	194	0	0	0	0	0
OP_F048-OP_R036	Bacteria	C3-C5	92.89	207285	15858	94.02	723	46	340	805	345	814	464	-	0	0	2842	0	0	194	0	0	0	0	0
OP_F048-OP_R048	Bacteria	C3-C5	92.71	206880	16263	93.89	722	47	340	805	345	814	464	-	0	0	2842	0	0	194	0	0	0	0	0
OP_F048-OP_R050	Bacteria	C3-C6	90.94	202917	20226	88.3	679	90	340	925	332	935	584	-	0	0	2842	0	0	194	0	0	0	0	0
OP_F048-OP_R052	Bacteria	C3-C6	91.21	203537	19606	88.3	679	90	340	925	332	935	584	-	0	0	2842	0	0	194	0	0	0	0	0
OP_F048-OP_R066	Bacteria	C3-C5	89.67	200089	23054	85.31	656	113	340	804	345	814	464	-	0	0	2842	0	0	194	0	0	0	0	0
OP_F048-OP_R067	Bacteria	C3-C6	91.38	203899	19244	88.3	679	90	340	925	332	935	584	-	0	0	2842	0	0	194	0	0	0	0	0
OP_F048-OP_R070	Bacteria	C3-C5	96.12	214479	8664	95.58	735	34	340	803	332	813	463	-	0	0	2842	0	0	194	0	0	0	0	0
OP_F048-OP_R073	Bacteria	C3-C6	95.73	213610	9533	94.8	729	40	340	892	332	903	552	-	0	0	2842	0	0	194	0	0	0	0	0
OP_F048-OP_R079	Bacteria	C3-C5	92.81	207100	16043	85.83	660	109	340	802	332	813	463	-	0	0	2842	0	0	194	0	0	0	0	0
OP_F048-OP_R086	Bacteria	C3-C5	89.52	199751	23392	84.01	646	123	340	800	345	810	460	-	0	0	2842	0	0	194	0	0	0	0	0
OP_F048-OP_R088	Bacteria	C3-C5	89.43	199567	23576	84.27	648	121	340	804	345	814	464	-	0	0	2842	0	0	194	0	0	0	0	0
OP_F048-OP_R089	Bacteria	C3-C6	79.41	177202	45941	84.14	647	122	342	925	345	935	583	-	0	0	2842	0	0	194	0	0	0	0	0
OP_F048-OP_R108	Bacteria	C3-C6	75.29	168008	55135	80.88	622	147	342	925	345	935	583	-	0	0	2842	0	0	194	0	0	0	0	0
OP_F048-OP_R119	Bacteria	C3-C5	95.52	213143	10000	92.59	712	57	340	804	332	814	464	-	0	0	2842	0	0	194	0	0	0	0	0
OP_F048-OP_R139	Bacteria	C3-C5	89.08	198780	24363	83.75	644	125	340	804	345	814	464	-	0	0	2842	0	0	194	0	0	0	0	0
OP_F048-OP_R143	Bacteria	C3-C6	75.47	168397	54746	80.88	622	147	342	924	345	934	582	-	0	0	2842	0	0	194	0	0	0	0	0
OP_F048-OP_UI005	Bacteria	C3-C6	75.38	168211	54932	80.88	622	147	342	925	345	935	583	-	0	0	2842	0	0	194	0	0	0	0	0
OP_F049-KP_R002	Bacteria	C1-C4	10.32	23037	200106	72.3	556	213	9	535	9	541	527	-	0	0	2842	0	0	194	0	0	0	0	0
OP_F049-KP_R018	Bacteria	C1-C3	10.39	23176	199967	72.17	555	214	9	361	9	363	352	-	0	0	2842	0	0	194	0	0	0	0	0
OP_F049-KP_R020	Bacteria	C1-C3	10.44	23291	199852	73.6	566	203	9	362	9	364	353	-	0	0	2842	0	0	194	0	0	0	0	0
OP_F049-KP_R021	Bacteria	C1-C4	10.3	22988	200155	72.17	555	214	9	535	9	541	527	-	0	0	2842	0	0	194	0	0	0	0	0
OP_F049-KP_R022	Bacteria	C1-C4	10.19	22743	200400	68.79	529	240	9	536	9	542	528	-	0	0	2842	0	0	194	0	0	0	0	0
OP_F049-KP_R023	Bacteria	C1-C4	10.19	22749	200394	68.79	529	240	9	536	9	542	528	-	0	0	2842	0	0	194	0	0	0	0	0
OP_F049-KP_R025	Bacteria	C1-C4	10.2	22758	200385	69.05	531	238	9	536	9	542	528	-	0	0	2842	0	0	194	0	0	0	0	0
OP_F049-KP_R070	Bacteria	C1-C4	10.19	22746	200397	68.66	528	241	9	538	9	544	530	-	0	0	2842	0	0	194	0	0	0	0	0
OP_F049-KP_R071	Bacteria	C1-C4	10.43	23279	199864	74.9	576	193	9	533	9	539	525	-	0	0	2842	0	0	194	0	0	0	0	0
OP_F049-OP_R019	Bacteria	C1-C4	9.77	21793	201350	69.96	538	231	9	536	9	541	527	-	0	0	2842	0	0	194	0	0	0	0	0
OP_F049-OP_R028	Bacteria	C1-C3	10.29	22958	200185	69.05	531	238	9	366	9	368	357	-	0	0	2842	0	0	194	0	0	0	0	0
OP_F049-OP_R038	Bacteria	C1-C4	10.31	22996	200147	72.17	555	214	9	534	9	540	526	-	0	0	2842	0	0	194	0	0	0	0	0
OP_F049-OP_R040	Bacteria	C1-C4	10.42	23242	199901	74.77	575	194	9	533	9	539	525	-	0	0	2842	0	0	194	0	0	0	0	0
OP_F049-OP_R043	Bacteria	C1-C4	10.46	23331	199812	75.03	577	192	9	532	9	538	524	-	0	0	2842	0	0	194	0	0	0	0	0
OP_F049-OP_R045	Bacteria	C1-C4	10.2	22767	200376	68.79	529	240	9	536	9	542	528	-	0	0	2842	0	0	194	0	0	0	0	0
OP_F049-OP_R047	Bacteria	C1-C4	9.76	21786	201357	69.96	538	231	9	536	9	541	527	-	0	0	2842	0	0	194	0	0	0	0	0
OP_F049-OP_R051	Bacteria	C1-C4	10.17	22700	200443	68.53	527	242	9	538	9	544	530	-	0	0	2842	0	0	194	0	0	0	0	0
OP_F049-OP_R054	Bacteria	C1-C3	10.4	23196	199947	72.17	555	214	9	360	9	362	351	-	0	0	2842	0	0	194	0	0	0	0	0
OP_F049-OP_R100	Bacteria	C1-C4	10.18	22714	200429	68.66	528	241	9	537	9	543	529	-	0	0	2842	0	0	194	0	0	0	0	0
OP_F049-OP_R102	Bacteria	C1-C4	10.32	23025	200118	72.17	555	214	9	538	9	544	530	-	0	0	2842	0	0	194	0	0	0	0	0
OP_F049-OP_R115	Bacteria	C1-C4	10.19	22739	200404	68.66	528	241	9	538	9	544	530	-	0	0	2842	0	0	194	0	0	0	0	0
OP_F049-OP_R116	Bacteria	C1-C3	10.4	23196	199947	72.17	555	214	9	360	9	362	351	-	0	0	2842	0	0	194	0	0	0	0	0
OP_F049-OP_R146	Bacteria	C1-C4	10.43	23272	199871	74.9	576	193	9	533	9	539	525	-	0	0	2842	0	0	194	0	0	0	0	0
OP_F050-KP_R029	Bacteria	C3-C5	89.56	199850	23293	84.92	653	116	346	804	351	814	458	-	0	0	2842	0	0	194	0	0	0	0	0
OP_F050-KP_R030	Bacteria	C3-C5	90.9	202839	20304	86.22	663	106	346	796	351	806	450	-	0	0	2842	0	0	194	0	0	0	0	0
OP_F050-KP_R031	Bacteria	C3-C5	97.04	216539	6604	96.88	745	24	346	800	338	810	454	-	0	0	2842	0	0	194	0	0	0	0	0
OP_F050-KP_R032	Bacteria	C3-C5	93.95	209646	13497	95.45	734	35	346	801	351	810	454	-	0	0	2842	0	0	194	0	0	0	0	0
OP_F050-KP_R033	Bacteria	C3-C5	90.58	202125	21018	85.57	658	111	346	801	351	811	455	-	0	0	2842	0	0	194	0	0	0	0	0
OP_F050-KP_R034	Bacteria	C3-C5	93.4	208409	14734	92.59	712	57	346	802	351	811	455	-	0	0	2842	0	0	194	0	0	0	0	0
OP_F050-KP_R035	Bacteria	C3-C5	93.68	209051	14092	95.32	733	36	346	804	351	813	457	-	0	0	2842	0	0	194	0	0	0	0	0
OP_F050-KP_R036	Bacteria	C3-C5	90.46	201846	21297	85.57	658	111	346	803	351	813	457	-	0	0	2842	0	0	194	0	0	0	0	0
OP_F050-KP_R037	Bacteria	C3-C5	90.14	201136	22007	85.44	657	112	346	804	351	814	458	-	0	0	2842	0	0	194	0	0	0	0	0
OP_F050-KP_R038	Bacteria	C3-C5	93.44	208496	14647	95.06	731	38	346	805	351	814	458	-	0	0	2842	0	0	194	0	0	0	0	0
OP_F050-KP_R039	Bacteria	C3-C6	75.92	169407	53736	83.09	639	130	348	925	351	935	577	-	0	0	2842	0	0	194	0	0	0	0	0
OP_F050-KP_R040	Bacteria	C3-C6	91.5	204167	18976	88.69	682	87	346	925	338	935	578	-	0	0	2842	0	0	194	0	0	0	0	0
OP_F050-KP_R041	Bacteria	C3-C6	91.69	204607	18536	88.69	682	87	346	924	338	934	577	-	0	0	2842	0	0	194	0	0	0	0	0
OP_F050-OP_R010	Bacteria	C3-C5	93.44	208501	14642	95.06	731	38	346	805	351	814	458	-	0	0	2842	0	0	194	0	0	0	0	0
OP_F050-OP_R014	Bacteria	C3-C5	93.44	208505	14638	95.06	731	38	346	805	351	814	458	-	0	0	2842	0	0	194	0	0	0	0	0
OP_F050-OP_R020	Bacteria	C3-C5	93.78	209266	13877	95.32	733	36	346	804	351	813	457	-	0	0	2842	0	0	194	0	0	0	0	0
OP_F050-OP_R032	Bacteria	C3-C5	93.93	209606	13537	95.06	731	38	346	801	351	810	454	-	0	0	2842	0	0	194	0	0	0	0	0
OP_F050-OP_R036	Bacteria	C3-C5	93.53	208704	14439	95.19	732	37	346	805	351	814	458	-	0	0	2842	0	0	194	0	0	0	0	0
OP_F050-OP_R048	Bacteria	C3-C5	93.35	208294	14849	95.06	731	38	346	805	351	814	458	-	0	0	2842	0	0	194	0	0	0	0	0
OP_F050-OP_R050	Bacteria	C3-C6	91.56	204319	18824	89.6	689	80	346	925	338	935	578	-	0	0	2842	0	0	194	0	0	0	0	0
OP_F050-OP_R052	Bacteria	C3-C6	91.84	204942	18201	89.6	689	80	346	925	338	935	578	-	0	0	2842	0	0	194	0	0	0	0	0
OP_F050-OP_R066	Bacteria	C3-C5	90.28	201463	21680	86.48	665	104	346	804	351	814	458	-	0	0	2842	0	0	194	0	0	0	0	0
OP_F050-OP_R067	Bacteria	C3-C6	92.01	205307	17836	89.6	689	80	346	925	338	935	578	-	0	0	2842	0	0	194	0	0	0	0	0
OP_F050-OP_R070	Bacteria	C3-C5	96.77	215931	7212	96.75	744	25	346	803	338	813	457	-	0	0	2842	0	0	194	0	0	0	0	0
OP_F050-OP_R073	Bacteria	C3-C6	96.38	215073	8070	96.23	740	29	346	892	338	903	546	-	0	0	2842	0	0	194	0	0	0	0	0
OP_F050-OP_R079	Bacteria	C3-C5	93.44	208507	14636	87	669	100	346	802	338	813	457	-	0	0	2842	0	0	194	0	0	0	0	0
OP_F050-OP_R086	Bacteria	C3-C5	90.13	201119	22024	85.18	655	114	346	800	351	810	454	-	0	0	2842	0	0	194	0	0	0	0	0
OP_F050-OP_R088	Bacteria	C3-C5	90.05	200937	22206	85.44	657	112	346	804	351	814	458	-	0	0	2842	0	0	194	0	0	0	0	0
OP_F050-OP_R089	Bacteria	C3-C6	79.99	178499	44644	85.44	657	112	348	925	351	935	577	-	0	0	2842	0	0	194	0	0	0	0	0
OP_F050-OP_R108	Bacteria	C3-C6	75.85	169259	53884	82.18	632	137	348	925	351	935	577	-	0	0	2842	0	0	194	0	0	0	0	0
OP_F050-OP_R119	Bacteria	C3-C5	96.17	214587	8556	93.76	721	48	346	804	338	814	458	-	0	0	2842	0	0	194	0	0	0	0	0
OP_F050-OP_R139	Bacteria	C3-C5	89.69	200141	23002	84.92	653	116	346	804	351	814	458	-	0	0	2842	0	0	194	0	0	0	0	0
OP_F050-OP_R143	Bacteria	C3-C6	76.03	169647	53496	82.18	632	137	348	924	351	934	576	-	0	0	2842	0	0	194	0	0	0	0	0
OP_F050-OP_UI005	Bacteria	C3-C6	75.94	169464	53679	82.18	632	137	348	925	351	935	577	-	0	0	2842	0	0	194	0	0	0	0	0
OP_F053-KP_R002	Bacteria	C1-C4	19.03	42471	180672	79.58	612	157	9	534	9	534	525	-	0	0	2842	0	0	194	0	0	0	0	0
OP_F053-KP_R018	Bacteria	C1-C3	19.17	42768	180375	79.71	613	156	9	360	9	357	351	-	0	0	2842	0	0	194	0	0	0	0	0
OP_F053-KP_R020	Bacteria	C1-C3	19.27	43003	180140	81.14	624	145	9	361	9	358	352	-	0	0	2842	0	0	194	0	0	0	0	0
OP_F053-KP_R021	Bacteria	C1-C4	18.99	42367	180776	79.45	611	158	9	534	9	534	525	-	0	0	2842	0	0	194	0	0	0	0	0
OP_F053-KP_R022	Bacteria	C1-C4	18.77	41895	181248	75.68	582	187	9	535	9	535	526	-	0	0	2842	0	0	194	0	0	0	0	0
OP_F053-KP_R023	Bacteria	C1-C4	18.78	41917	181226	75.68	582	187	9	535	9	535	526	-	0	0	2842	0	0	194	0	0	0	0	0
OP_F053-KP_R025	Bacteria	C1-C4	18.79	41928	181215	75.94	584	185	9	535	9	535	526	-	0	0	2842	0	0	194	0	0	0	0	0
OP_F053-KP_R070	Bacteria	C1-C4	18.78	41900	181243	75.68	582	187	9	537	9	537	528	-	0	0	2842	0	0	194	0	0	0	0	0
OP_F053-KP_R071	Bacteria	C1-C4	19.3	43056	180087	82.44	634	135	9	531	9	532	523	-	0	0	2842	0	0	194	0	0	0	0	0
OP_F053-OP_R019	Bacteria	C1-C4	17.96	40082	183061	77.11	593	176	9	534	9	534	525	-	0	0	2842	0	0	194	0	0	0	0	0
OP_F053-OP_R028	Bacteria	C1-C3	18.97	42322	180821	75.94	584	185	9	365	9	362	356	-	0	0	2842	0	0	194	0	0	0	0	0
OP_F053-OP_R038	Bacteria	C1-C4	18.99	42383	180760	79.45	611	158	9	533	9	533	524	-	0	0	2842	0	0	194	0	0	0	0	0
OP_F053-OP_R040	Bacteria	C1-C4	19.27	42989	180154	82.31	633	136	9	531	9	532	523	-	0	0	2842	0	0	194	0	0	0	0	0
OP_F053-OP_R043	Bacteria	C1-C4	19.31	43099	180044	82.57	635	134	9	530	9	531	522	-	0	0	2842	0	0	194	0	0	0	0	0
OP_F053-OP_R045	Bacteria	C1-C4	18.8	41945	181198	75.68	582	187	9	535	9	535	526	-	0	0	2842	0	0	194	0	0	0	0	0
OP_F053-OP_R047	Bacteria	C1-C4	17.96	40074	183069	77.11	593	176	9	534	9	534	525	-	0	0	2842	0	0	194	0	0	0	0	0
OP_F053-OP_R051	Bacteria	C1-C4	18.73	41802	181341	75.55	581	188	9	537	9	537	528	-	0	0	2842	0	0	194	0	0	0	0	0
OP_F053-OP_R054	Bacteria	C1-C3	19.18	42810	180333	79.71	613	156	9	359	9	356	350	-	0	0	2842	0	0	194	0	0	0	0	0
OP_F053-OP_R100	Bacteria	C1-C4	18.75	41831	181312	75.55	581	188	9	536	9	536	527	-	0	0	2842	0	0	194	0	0	0	0	0
OP_F053-OP_R102	Bacteria	C1-C4	19.02	42447	180696	79.58	612	157	9	537	9	537	528	-	0	0	2842	0	0	194	0	0	0	0	0
OP_F053-OP_R115	Bacteria	C1-C4	18.77	41892	181251	75.68	582	187	9	537	9	537	528	-	0	0	2842	0	0	194	0	0	0	0	0
OP_F053-OP_R116	Bacteria	C1-C3	19.19	42813	180330	79.71	613	156	9	359	9	356	350	-	0	0	2842	0	0	194	0	0	0	0	0
OP_F053-OP_R146	Bacteria	C1-C4	19.29	43048	180095	82.44	634	135	9	531	9	532	523	-	0	0	2842	0	0	194	0	0	0	0	0
OP_F058-KP_R002	Bacteria	C1-C4	10.46	23349	199794	72.95	561	208	10	535	10	541	526	-	0	0	2842	0	0	194	0	0	0	0	0
OP_F058-KP_R018	Bacteria	C1-C3	10.53	23488	199655	72.82	560	209	10	361	10	363	351	-	0	0	2842	0	0	194	0	0	0	0	0
OP_F058-KP_R020	Bacteria	C1-C3	10.58	23603	199540	74.25	571	198	10	362	10	364	352	-	0	0	2842	0	0	194	0	0	0	0	0
OP_F058-KP_R021	Bacteria	C1-C4	10.44	23300	199843	72.82	560	209	10	535	10	541	526	-	0	0	2842	0	0	194	0	0	0	0	0
OP_F058-KP_R022	Bacteria	C1-C4	10.33	23055	200088	69.44	534	235	10	536	10	542	527	-	0	0	2842	0	0	194	0	0	0	0	0
OP_F058-KP_R023	Bacteria	C1-C4	10.33	23061	200082	69.44	534	235	10	536	10	542	527	-	0	0	2842	0	0	194	0	0	0	0	0
OP_F058-KP_R025	Bacteria	C1-C4	10.34	23070	200073	69.7	536	233	10	536	10	542	527	-	0	0	2842	0	0	194	0	0	0	0	0
OP_F058-KP_R070	Bacteria	C1-C4	10.33	23058	200085	69.31	533	236	10	538	10	544	529	-	0	0	2842	0	0	194	0	0	0	0	0
OP_F058-KP_R071	Bacteria	C1-C4	10.57	23592	199551	75.55	581	188	10	533	10	539	524	-	0	0	2842	0	0	194	0	0	0	0	0
OP_F058-OP_R019	Bacteria	C1-C4	9.89	22080	201063	70.61	543	226	10	536	10	541	526	-	0	0	2842	0	0	194	0	0	0	0	0
OP_F058-OP_R028	Bacteria	C1-C3	10.43	23269	199874	69.7	536	233	10	366	10	368	356	-	0	0	2842	0	0	194	0	0	0	0	0
OP_F058-OP_R038	Bacteria	C1-C4	10.45	23308	199835	72.82	560	209	10	534	10	540	525	-	0	0	2842	0	0	194	0	0	0	0	0
OP_F058-OP_R040	Bacteria	C1-C4	10.56	23555	199588	75.42	580	189	10	533	10	539	524	-	0	0	2842	0	0	194	0	0	0	0	0
OP_F058-OP_R043	Bacteria	C1-C4	10.6	23644	199499	75.68	582	187	10	532	10	538	522	-	0	0	2842	0	0	194	0	0	0	0	0
OP_F058-OP_R045	Bacteria	C1-C4	10.34	23079	200064	69.44	534	235	10	536	10	542	527	-	0	0	2842	0	0	194	0	0	0	0	0
OP_F058-OP_R047	Bacteria	C1-C4	9.89	22073	201070	70.61	543	226	10	536	10	541	526	-	0	0	2842	0	0	194	0	0	0	0	0
OP_F058-OP_R051	Bacteria	C1-C4	10.31	23012	200131	69.18	532	237	10	538	10	544	529	-	0	0	2842	0	0	194	0	0	0	0	0
OP_F058-OP_R054	Bacteria	C1-C3	10.54	23509	199634	72.82	560	209	10	360	10	362	350	-	0	0	2842	0	0	194	0	0	0	0	0
OP_F058-OP_R100	Bacteria	C1-C4	10.32	23026	200117	69.31	533	236	10	537	10	543	528	-	0	0	2842	0	0	194	0	0	0	0	0
OP_F058-OP_R102	Bacteria	C1-C4	10.46	23337	199806	72.82	560	209	10	538	10	544	529	-	0	0	2842	0	0	194	0	0	0	0	0
OP_F058-OP_R115	Bacteria	C1-C4	10.33	23051	200092	69.31	533	236	10	538	10	544	529	-	0	0	2842	0	0	194	0	0	0	0	0
OP_F058-OP_R116	Bacteria	C1-C3	10.54	23509	199634	72.82	560	209	10	360	10	362	350	-	0	0	2842	0	0	194	0	0	0	0	0
OP_F058-OP_R146	Bacteria	C1-C4	10.57	23585	199558	75.55	581	188	10	533	10	539	524	-	0	0	2842	0	0	194	0	0	0	0	0
OP_F059-KP_R039	Bacteria	C4-C6	71.82	160258	62885	76.98	592	177	513	926	521	935	413	-	0	0	2842	0	0	194	0	0	0	0	0
OP_F059-KP_R040	Bacteria	C4-C6	81.58	182048	41095	81.92	630	139	513	926	521	935	413	-	0	0	2842	0	0	194	0	0	0	0	0
OP_F059-KP_R041	Bacteria	C4-C6	81.76	182450	40693	81.92	630	139	513	925	521	934	412	-	0	0	2842	0	0	194	0	0	0	0	0
OP_F059-KP_R046	Bacteria	C4-C7	80.84	180396	42747	81.01	623	146	511	1063	521	1075	551	-	0	0	2842	0	0	194	0	0	0	0	0
OP_F059-KP_R050	Bacteria	C4-C7	82.88	184950	38193	84.14	647	122	512	1063	521	1075	551	-	0	0	2842	0	0	194	0	0	0	0	0
OP_F059-KP_R053	Bacteria	C4-C7	85.62	191064	32079	84.14	647	122	512	1077	521	1088	564	-	0	0	2842	0	0	194	0	0	0	0	0
OP_F059-KP_R054	Bacteria	C4-C7	77.08	172008	51135	81.14	624	145	512	1079	521	1090	567	-	0	0	2842	0	0	194	0	0	0	0	0
OP_F059-KP_R055	Bacteria	C4-C7	76.91	171630	51513	81.14	624	145	512	1080	521	1091	568	-	0	0	2842	0	0	194	0	0	0	0	0
OP_F059-OP_R030	Bacteria	C4-C7	85.89	191667	31476	86.61	666	103	512	1080	521	1091	567	-	0	0	2842	0	0	194	0	0	0	0	0
OP_F059-OP_R050	Bacteria	C4-C6	81.6	182081	41062	81.92	630	139	513	926	521	935	413	-	0	0	2842	0	0	194	0	0	0	0	0
OP_F059-OP_R052	Bacteria	C4-C6	81.85	182649	40494	81.92	630	139	513	926	521	935	413	-	0	0	2842	0	0	194	0	0	0	0	0
OP_F059-OP_R067	Bacteria	C4-C6	82	182989	40154	81.92	630	139	513	926	521	935	413	-	0	0	2842	0	0	194	0	0	0	0	0
OP_F059-OP_R073	Bacteria	C4-C6	85.51	190815	32328	87	669	100	512	893	521	903	381	-	0	0	2842	0	0	194	0	0	0	0	0
OP_F059-OP_R089	Bacteria	C4-C6	75.42	168304	54839	79.45	611	158	512	925	521	935	413	-	0	0	2842	0	0	194	0	0	0	0	0
OP_F059-OP_R108	Bacteria	C4-C6	71.8	160227	62916	76.98	592	177	513	926	521	935	413	-	0	0	2842	0	0	194	0	0	0	0	0
OP_F059-OP_R143	Bacteria	C4-C6	71.97	160602	62541	76.98	592	177	513	925	521	934	412	-	0	0	2842	0	0	194	0	0	0	0	0
OP_F059-OP_UI005	Bacteria	C4-C6	71.89	160420	62723	76.98	592	177	513	926	521	935	413	-	0	0	2842	0	0	194	0	0	0	0	0
OP_F059-OP_UI009	Bacteria	C4-C7	80.11	178769	44374	78.67	605	164	512	1073	521	1085	561	-	0	0	2842	0	0	194	0	0	0	0	0
OP_F063-KP_R002	Bacteria	C1-C4	18.87	42109	181034	78.02	600	169	10	534	10	534	524	-	0	0	2842	0	0	194	0	0	0	0	0
OP_F063-KP_R018	Bacteria	C1-C3	19	42399	180744	78.02	600	169	10	360	10	357	350	-	0	0	2842	0	0	194	0	0	0	0	0
OP_F063-KP_R020	Bacteria	C1-C3	19.1	42629	180514	79.45	611	158	10	361	10	358	351	-	0	0	2842	0	0	194	0	0	0	0	0
OP_F063-KP_R021	Bacteria	C1-C4	18.82	42006	181137	77.89	599	170	10	534	10	534	524	-	0	0	2842	0	0	194	0	0	0	0	0
OP_F063-KP_R022	Bacteria	C1-C4	18.62	41541	181602	74.25	571	198	10	535	10	535	525	-	0	0	2842	0	0	194	0	0	0	0	0
OP_F063-KP_R023	Bacteria	C1-C4	18.63	41562	181581	74.25	571	198	10	535	10	535	525	-	0	0	2842	0	0	194	0	0	0	0	0
OP_F063-KP_R025	Bacteria	C1-C4	18.63	41573	181570	74.51	573	196	10	535	10	535	525	-	0	0	2842	0	0	194	0	0	0	0	0
OP_F063-KP_R070	Bacteria	C1-C4	18.62	41548	181595	74.12	570	199	10	537	10	537	527	-	0	0	2842	0	0	194	0	0	0	0	0
OP_F063-KP_R071	Bacteria	C1-C4	19.13	42681	180462	80.88	622	147	10	532	10	532	522	-	0	0	2842	0	0	194	0	0	0	0	0
OP_F063-OP_R019	Bacteria	C1-C4	17.83	39787	183356	75.68	582	187	10	534	10	534	524	-	0	0	2842	0	0	194	0	0	0	0	0
OP_F063-OP_R028	Bacteria	C1-C3	18.8	41957	181186	74.38	572	197	10	365	10	362	355	-	0	0	2842	0	0	194	0	0	0	0	0
OP_F063-OP_R038	Bacteria	C1-C4	18.83	42020	181123	77.89	599	170	10	533	10	533	523	-	0	0	2842	0	0	194	0	0	0	0	0
OP_F063-OP_R040	Bacteria	C1-C4	19.1	42614	180529	80.75	621	148	10	532	10	532	522	-	0	0	2842	0	0	194	0	0	0	0	0
OP_F063-OP_R043	Bacteria	C1-C4	19.15	42721	180422	81.01	623	146	10	531	10	531	521	-	0	0	2842	0	0	194	0	0	0	0	0
OP_F063-OP_R045	Bacteria	C1-C4	18.64	41590	181553	74.25	571	198	10	535	10	535	525	-	0	0	2842	0	0	194	0	0	0	0	0
OP_F063-OP_R047	Bacteria	C1-C4	17.83	39779	183364	75.68	582	187	10	534	10	534	524	-	0	0	2842	0	0	194	0	0	0	0	0
OP_F063-OP_R051	Bacteria	C1-C4	18.58	41451	181692	73.99	569	200	10	537	10	537	527	-	0	0	2842	0	0	194	0	0	0	0	0
OP_F063-OP_R054	Bacteria	C1-C3	19.02	42441	180702	78.02	600	169	10	359	10	356	349	-	0	0	2842	0	0	194	0	0	0	0	0
OP_F063-OP_R100	Bacteria	C1-C4	18.59	41478	181665	74.12	570	199	10	536	10	536	526	-	0	0	2842	0	0	194	0	0	0	0	0
OP_F063-OP_R102	Bacteria	C1-C4	18.86	42088	181055	77.89	599	170	10	537	10	537	527	-	0	0	2842	0	0	194	0	0	0	0	0
OP_F063-OP_R115	Bacteria	C1-C4	18.62	41540	181603	74.12	570	199	10	537	10	537	527	-	0	0	2842	0	0	194	0	0	0	0	0
OP_F063-OP_R116	Bacteria	C1-C3	19.02	42444	180699	78.02	600	169	10	359	10	356	349	-	0	0	2842	0	0	194	0	0	0	0	0
OP_F063-OP_R146	Bacteria	C1-C4	19.12	42673	180470	80.88	622	147	10	532	10	532	522	-	0	0	2842	0	0	194	0	0	0	0	0
OP_F066-KP_R056	Bacteria	C5-V7	91.96	205195	17948	81.92	630	139	782	1113	792	1125	331	-	0	0	2842	0	0	194	0	0	0	0	0
OP_F066-KP_R057	Bacteria	C5-V7	89.16	198957	24186	82.7	636	133	782	1113	792	1125	331	-	0	0	2842	0	0	194	0	0	0	0	0
OP_F066-OP_R026	Bacteria	C5-V7	88.43	197322	25821	79.32	610	159	782	1113	792	1125	331	-	0	0	2842	0	0	194	0	0	0	0	0
OP_F066-OP_R029	Bacteria	C5-C8	94.08	209936	13207	89.6	689	80	782	1192	792	1204	410	-	0	0	2842	0	0	194	0	0	0	0	0
OP_F076-KP_R056	Bacteria	C5-V7	85.23	190176	32967	72.56	558	211	782	1113	792	1125	331	-	0	0	2842	0	0	194	0	0	0	0	0
OP_F076-KP_R057	Bacteria	C5-V7	82.07	183132	40011	71.52	550	219	782	1113	792	1125	331	-	0	0	2842	0	0	194	0	0	0	0	0
OP_F076-KP_R074	Bacteria	C5-V7	90.35	201610	21533	86.74	667	102	782	1113	792	1125	330	C5-C7	0.21	6	2836	0.52	1	193	724	1054	724	1054	330
OP_F076-OP_R026	Bacteria	C5-V7	81.73	182371	40772	69.96	538	231	782	1113	792	1125	331	-	0	0	2842	0	0	194	0	0	0	0	0
OP_F076-OP_R029	Bacteria	C5-C8	87.31	194820	28323	80.49	619	150	782	1192	792	1204	410	-	0	0	2842	0	0	194	0	0	0	0	0
OP_F077-KP_R029	Bacteria	C3-C5	88.47	197414	25729	78.02	600	169	340	804	345	814	464	-	0	0	2842	0	0	194	0	0	0	0	0
OP_F077-KP_R030	Bacteria	C3-C5	89.79	200367	22776	79.32	610	159	340	796	345	806	456	-	0	0	2842	0	0	194	0	0	0	0	0
OP_F077-KP_R031	Bacteria	C3-C5	95.88	213957	9186	89.99	692	77	340	800	332	810	460	-	0	0	2842	0	0	194	0	0	0	0	0
OP_F077-KP_R032	Bacteria	C3-C5	92.82	207112	16031	88.56	681	88	340	801	345	810	460	-	0	0	2842	0	0	194	0	0	0	0	0
OP_F077-KP_R033	Bacteria	C3-C5	89.48	199661	23482	78.67	605	164	340	801	345	811	461	-	0	0	2842	0	0	194	0	0	0	0	0
OP_F077-KP_R034	Bacteria	C3-C5	92.27	205886	17257	85.7	659	110	340	802	345	811	461	-	0	0	2842	0	0	194	0	0	0	0	0
OP_F077-KP_R035	Bacteria	C3-C5	92.55	206524	16619	88.43	680	89	340	804	345	813	463	-	0	0	2842	0	0	194	0	0	0	0	0
OP_F077-KP_R036	Bacteria	C3-C5	89.35	199385	23758	78.67	605	164	340	803	345	813	463	-	0	0	2842	0	0	194	0	0	0	0	0
OP_F077-KP_R037	Bacteria	C3-C5	89.04	198681	24462	78.54	604	165	340	804	345	814	464	-	0	0	2842	0	0	194	0	0	0	0	0
OP_F077-KP_R038	Bacteria	C3-C5	92.31	205975	17168	88.17	678	91	341	805	345	814	464	-	0	0	2842	0	0	194	0	0	0	0	0
OP_F077-KP_R039	Bacteria	C3-C6	74.89	167110	56033	76.07	585	184	342	925	345	935	583	-	0	0	2842	0	0	194	0	0	0	0	0
OP_F077-KP_R040	Bacteria	C3-C6	90.38	201672	21471	81.66	628	141	340	925	332	935	584	-	0	0	2842	0	0	194	0	0	0	0	0
OP_F077-KP_R041	Bacteria	C3-C6	90.57	202110	21033	81.66	628	141	340	924	332	934	583	-	0	0	2842	0	0	194	0	0	0	0	0
OP_F077-OP_R010	Bacteria	C3-C5	92.31	205980	17163	88.17	678	91	341	805	345	814	464	-	0	0	2842	0	0	194	0	0	0	0	0
OP_F077-OP_R014	Bacteria	C3-C5	92.31	205984	17159	88.17	678	91	341	805	345	814	464	-	0	0	2842	0	0	194	0	0	0	0	0
OP_F077-OP_R020	Bacteria	C3-C5	92.65	206738	16405	88.43	680	89	340	804	345	813	463	-	0	0	2842	0	0	194	0	0	0	0	0
OP_F077-OP_R032	Bacteria	C3-C5	92.8	207072	16071	88.17	678	91	340	801	345	810	460	-	0	0	2842	0	0	194	0	0	0	0	0
OP_F077-OP_R036	Bacteria	C3-C5	92.4	206179	16964	88.3	679	90	340	805	345	814	464	-	0	0	2842	0	0	194	0	0	0	0	0
OP_F077-OP_R048	Bacteria	C3-C5	92.22	205774	17369	88.17	678	91	340	805	345	814	464	-	0	0	2842	0	0	194	0	0	0	0	0
OP_F077-OP_R050	Bacteria	C3-C6	90.45	201824	21319	82.57	635	134	340	925	332	935	584	-	0	0	2842	0	0	194	0	0	0	0	0
OP_F077-OP_R052	Bacteria	C3-C6	90.72	202441	20702	82.57	635	134	340	925	332	935	584	-	0	0	2842	0	0	194	0	0	0	0	0
OP_F077-OP_R066	Bacteria	C3-C5	89.18	199004	24139	79.58	612	157	340	804	345	814	464	-	0	0	2842	0	0	194	0	0	0	0	0
OP_F077-OP_R067	Bacteria	C3-C6	90.88	202799	20344	82.57	635	134	340	925	332	935	584	-	0	0	2842	0	0	194	0	0	0	0	0
OP_F077-OP_R070	Bacteria	C3-C5	95.61	213356	9787	89.86	691	78	340	803	332	813	463	-	0	0	2842	0	0	194	0	0	0	0	0
OP_F077-OP_R073	Bacteria	C3-C6	95.22	212481	10662	89.08	685	84	340	892	332	903	552	-	0	0	2842	0	0	194	0	0	0	0	0
OP_F077-OP_R079	Bacteria	C3-C5	92.32	205999	17144	80.1	616	153	340	802	332	813	463	-	0	0	2842	0	0	194	0	0	0	0	0
OP_F077-OP_R086	Bacteria	C3-C5	89.03	198670	24473	78.28	602	167	340	800	345	810	460	-	0	0	2842	0	0	194	0	0	0	0	0
OP_F077-OP_R088	Bacteria	C3-C5	88.95	198483	24660	78.54	604	165	340	804	345	814	464	-	0	0	2842	0	0	194	0	0	0	0	0
OP_F077-OP_R089	Bacteria	C3-C6	78.93	176134	47009	78.41	603	166	342	925	345	935	583	-	0	0	2842	0	0	194	0	0	0	0	0
OP_F077-OP_R108	Bacteria	C3-C6	74.82	166962	56181	75.16	578	191	342	925	345	935	583	-	0	0	2842	0	0	194	0	0	0	0	0
OP_F077-OP_R119	Bacteria	C3-C5	95.02	212022	11121	86.87	668	101	340	804	332	814	464	-	0	0	2842	0	0	194	0	0	0	0	0
OP_F077-OP_R139	Bacteria	C3-C5	88.6	197700	25443	78.02	600	169	340	804	345	814	464	-	0	0	2842	0	0	194	0	0	0	0	0
OP_F077-OP_R143	Bacteria	C3-C6	75	167350	55793	75.16	578	191	342	924	345	934	582	-	0	0	2842	0	0	194	0	0	0	0	0
OP_F077-OP_UI005	Bacteria	C3-C6	74.91	167163	55980	75.16	578	191	342	925	345	935	583	-	0	0	2842	0	0	194	0	0	0	0	0
OP_F079-KP_R056	Bacteria	C5-V7	84.99	189657	33486	72.56	558	211	784	1113	794	1125	329	-	0	0	2842	0	0	194	0	0	0	0	0
OP_F079-KP_R057	Bacteria	C5-V7	81.84	182614	40529	71.52	550	219	784	1113	794	1125	329	-	0	0	2842	0	0	194	0	0	0	0	0
OP_F079-KP_R074	Bacteria	C5-V7	90.12	201088	22055	86.74	667	102	784	1113	794	1125	329	C5-C7	0.21	6	2836	0.52	1	193	726	1054	726	1054	328
OP_F079-OP_R026	Bacteria	C5-V7	81.49	181850	41293	69.96	538	231	784	1113	794	1125	329	-	0	0	2842	0	0	194	0	0	0	0	0
OP_F079-OP_R029	Bacteria	C5-C8	87.08	194314	28829	80.36	618	151	784	1192	794	1204	408	-	0	0	2842	0	0	194	0	0	0	0	0
OP_F079-OP_R101	Bacteria	C5-C9	78.64	175484	47659	64.89	499	270	785	1385	794	1393	600	-	0	0	2842	0	0	194	0	0	0	0	0
OP_F080-KP_R002	Bacteria	C1-C4	13.18	29401	193742	73.34	564	205	8	535	8	534	527	-	0	0	2842	0	0	194	0	0	0	0	0
OP_F080-KP_R018	Bacteria	C1-C3	13.23	29529	193614	72.95	561	208	8	360	8	357	352	-	0	0	2842	0	0	194	0	0	0	0	0
OP_F080-KP_R020	Bacteria	C1-C3	13.28	29641	193502	74.25	571	198	8	361	8	358	353	-	0	0	2842	0	0	194	0	0	0	0	0
OP_F080-KP_R021	Bacteria	C1-C4	13.15	29350	193793	73.21	563	206	8	535	8	534	527	-	0	0	2842	0	0	194	0	0	0	0	0
OP_F080-KP_R022	Bacteria	C1-C4	13.04	29094	194049	69.44	534	235	8	536	8	535	528	-	0	0	2842	0	0	194	0	0	0	0	0
OP_F080-KP_R023	Bacteria	C1-C4	13.04	29105	194038	69.44	534	235	8	536	8	535	528	-	0	0	2842	0	0	194	0	0	0	0	0
OP_F080-KP_R025	Bacteria	C1-C4	13.04	29109	194034	69.7	536	233	8	536	8	535	528	-	0	0	2842	0	0	194	0	0	0	0	0
OP_F080-KP_R070	Bacteria	C1-C4	13.04	29093	194050	69.44	534	235	8	538	8	537	530	-	0	0	2842	0	0	194	0	0	0	0	0
OP_F080-KP_R071	Bacteria	C1-C4	13.28	29628	193515	75.68	582	187	8	533	8	532	525	-	0	0	2842	0	0	194	0	0	0	0	0
OP_F080-OP_R019	Bacteria	C1-C4	12.21	27250	195893	70.87	545	224	8	536	8	534	528	-	0	0	2842	0	0	194	0	0	0	0	0
OP_F080-OP_R028	Bacteria	C1-C3	13.13	29296	193847	69.18	532	237	8	365	8	362	357	-	0	0	2842	0	0	194	0	0	0	0	0
OP_F080-OP_R038	Bacteria	C1-C4	13.16	29358	193785	73.21	563	206	8	534	8	533	526	-	0	0	2842	0	0	194	0	0	0	0	0
OP_F080-OP_R040	Bacteria	C1-C4	13.26	29593	193550	75.55	581	188	8	533	8	532	525	-	0	0	2842	0	0	194	0	0	0	0	0
OP_F080-OP_R043	Bacteria	C1-C4	13.3	29682	193461	75.81	583	186	8	532	8	531	524	-	0	0	2842	0	0	194	0	0	0	0	0
OP_F080-OP_R045	Bacteria	C1-C4	13.05	29121	194022	69.44	534	235	8	536	8	535	528	-	0	0	2842	0	0	194	0	0	0	0	0
OP_F080-OP_R047	Bacteria	C1-C4	12.21	27242	195901	70.87	545	224	8	536	8	534	528	-	0	0	2842	0	0	194	0	0	0	0	0
OP_F080-OP_R051	Bacteria	C1-C4	13.02	29044	194099	69.31	533	236	8	538	8	537	530	-	0	0	2842	0	0	194	0	0	0	0	0
OP_F080-OP_R054	Bacteria	C1-C3	13.24	29553	193590	72.95	561	208	8	359	8	356	351	-	0	0	2842	0	0	194	0	0	0	0	0
OP_F080-OP_R100	Bacteria	C1-C4	13.02	29056	194087	69.31	533	236	8	537	8	536	529	-	0	0	2842	0	0	194	0	0	0	0	0
OP_F080-OP_R102	Bacteria	C1-C4	13.17	29384	193759	73.34	564	205	8	538	8	537	530	-	0	0	2842	0	0	194	0	0	0	0	0
OP_F080-OP_R115	Bacteria	C1-C4	13.03	29085	194058	69.44	534	235	8	538	8	537	530	-	0	0	2842	0	0	194	0	0	0	0	0
OP_F080-OP_R116	Bacteria	C1-C3	13.25	29556	193587	72.95	561	208	8	359	8	356	351	-	0	0	2842	0	0	194	0	0	0	0	0
OP_F080-OP_R146	Bacteria	C1-C4	13.27	29620	193523	75.68	582	187	8	533	8	532	525	-	0	0	2842	0	0	194	0	0	0	0	0
OP_F082-KP_R002	Bacteria	C1-C4	18.87	42107	181036	79.45	611	158	9	534	9	534	525	-	0	0	2842	0	0	194	0	0	0	0	0
OP_F082-KP_R018	Bacteria	C1-C3	19	42406	180737	79.58	612	157	9	360	9	357	351	-	0	0	2842	0	0	194	0	0	0	0	0
OP_F082-KP_R020	Bacteria	C1-C3	19.11	42640	180503	81.01	623	146	9	361	9	358	352	-	0	0	2842	0	0	194	0	0	0	0	0
OP_F082-KP_R021	Bacteria	C1-C4	18.82	42003	181140	79.32	610	159	9	534	9	534	525	-	0	0	2842	0	0	194	0	0	0	0	0
OP_F082-KP_R022	Bacteria	C1-C4	18.61	41532	181611	75.55	581	188	9	535	9	535	526	-	0	0	2842	0	0	194	0	0	0	0	0
OP_F082-KP_R023	Bacteria	C1-C4	18.62	41554	181589	75.55	581	188	9	535	9	535	526	-	0	0	2842	0	0	194	0	0	0	0	0
OP_F082-KP_R025	Bacteria	C1-C4	18.63	41565	181578	75.81	583	186	9	535	9	535	526	-	0	0	2842	0	0	194	0	0	0	0	0
OP_F082-KP_R070	Bacteria	C1-C4	18.62	41539	181604	75.55	581	188	9	537	9	537	528	-	0	0	2842	0	0	194	0	0	0	0	0
OP_F082-KP_R071	Bacteria	C1-C4	19.13	42692	180451	82.31	633	136	9	532	9	532	523	-	0	0	2842	0	0	194	0	0	0	0	0
OP_F082-OP_R019	Bacteria	C1-C4	17.82	39761	183382	76.98	592	177	9	534	9	534	525	-	0	0	2842	0	0	194	0	0	0	0	0
OP_F082-OP_R028	Bacteria	C1-C3	18.8	41960	181183	75.81	583	186	9	365	9	362	356	-	0	0	2842	0	0	194	0	0	0	0	0
OP_F082-OP_R038	Bacteria	C1-C4	18.83	42019	181124	79.32	610	159	9	533	9	533	524	-	0	0	2842	0	0	194	0	0	0	0	0
OP_F082-OP_R040	Bacteria	C1-C4	19.1	42625	180518	82.18	632	137	9	532	9	532	523	-	0	0	2842	0	0	194	0	0	0	0	0
OP_F082-OP_R043	Bacteria	C1-C4	19.15	42734	180409	82.44	634	135	9	531	9	531	522	-	0	0	2842	0	0	194	0	0	0	0	0
OP_F082-OP_R045	Bacteria	C1-C4	18.63	41582	181561	75.55	581	188	9	535	9	535	526	-	0	0	2842	0	0	194	0	0	0	0	0
OP_F082-OP_R047	Bacteria	C1-C4	17.81	39753	183390	76.98	592	177	9	534	9	534	525	-	0	0	2842	0	0	194	0	0	0	0	0
OP_F082-OP_R051	Bacteria	C1-C4	18.57	41441	181702	75.42	580	189	9	537	9	537	528	-	0	0	2842	0	0	194	0	0	0	0	0
OP_F082-OP_R054	Bacteria	C1-C3	19.02	42447	180696	79.58	612	157	9	359	9	356	350	-	0	0	2842	0	0	194	0	0	0	0	0
OP_F082-OP_R100	Bacteria	C1-C4	18.58	41469	181674	75.42	580	189	9	536	9	536	527	-	0	0	2842	0	0	194	0	0	0	0	0
OP_F082-OP_R102	Bacteria	C1-C4	18.86	42085	181058	79.45	611	158	9	537	9	537	528	-	0	0	2842	0	0	194	0	0	0	0	0
OP_F082-OP_R115	Bacteria	C1-C4	18.61	41531	181612	75.55	581	188	9	537	9	537	528	-	0	0	2842	0	0	194	0	0	0	0	0
OP_F082-OP_R116	Bacteria	C1-C3	19.02	42450	180693	79.58	612	157	9	359	9	356	350	-	0	0	2842	0	0	194	0	0	0	0	0
OP_F082-OP_R146	Bacteria	C1-C4	19.13	42684	180459	82.31	633	136	9	532	9	532	523	-	0	0	2842	0	0	194	0	0	0	0	0
OP_F086-KP_R002	Bacteria	C1-C4	19.9	44406	178737	79.32	610	159	12	534	12	534	522	-	0	0	2842	0	0	194	0	0	0	0	0
OP_F086-KP_R018	Bacteria	C1-C3	20.04	44711	178432	79.32	610	159	12	360	12	357	348	-	0	0	2842	0	0	194	0	0	0	0	0
OP_F086-KP_R020	Bacteria	C1-C3	20.15	44956	178187	80.75	621	148	12	361	12	358	349	-	0	0	2842	0	0	194	0	0	0	0	0
OP_F086-KP_R021	Bacteria	C1-C4	19.85	44295	178848	79.19	609	160	12	534	12	534	522	-	0	0	2842	0	0	194	0	0	0	0	0
OP_F086-KP_R022	Bacteria	C1-C4	19.64	43816	179327	75.42	580	189	12	535	12	535	523	-	0	0	2842	0	0	194	0	0	0	0	0
OP_F086-KP_R023	Bacteria	C1-C4	19.65	43841	179302	75.42	580	189	12	535	12	535	523	-	0	0	2842	0	0	194	0	0	0	0	0
OP_F086-KP_R025	Bacteria	C1-C4	19.65	43852	179291	75.68	582	187	12	535	12	535	523	-	0	0	2842	0	0	194	0	0	0	0	0
OP_F086-KP_R070	Bacteria	C1-C4	19.64	43823	179320	75.29	579	190	12	537	12	537	525	-	0	0	2842	0	0	194	0	0	0	0	0
OP_F086-KP_R071	Bacteria	C1-C4	20.17	45010	178133	82.18	632	137	12	531	12	532	520	-	0	0	2842	0	0	194	0	0	0	0	0
OP_F086-OP_R019	Bacteria	C1-C4	18.83	42010	181133	76.98	592	177	12	534	12	534	522	-	0	0	2842	0	0	194	0	0	0	0	0
OP_F086-OP_R028	Bacteria	C1-C3	19.83	44257	178886	75.55	581	188	12	365	12	362	353	-	0	0	2842	0	0	194	0	0	0	0	0
OP_F086-OP_R038	Bacteria	C1-C4	19.86	44311	178832	79.19	609	160	12	533	12	533	521	-	0	0	2842	0	0	194	0	0	0	0	0
OP_F086-OP_R040	Bacteria	C1-C4	20.14	44939	178204	82.05	631	138	12	531	12	532	520	-	0	0	2842	0	0	194	0	0	0	0	0
OP_F086-OP_R043	Bacteria	C1-C4	20.19	45052	178091	82.31	633	136	12	530	12	531	519	-	0	0	2842	0	0	194	0	0	0	0	0
OP_F086-OP_R045	Bacteria	C1-C4	19.66	43869	179274	75.42	580	189	12	535	12	535	523	-	0	0	2842	0	0	194	0	0	0	0	0
OP_F086-OP_R047	Bacteria	C1-C4	18.82	42002	181141	76.98	592	177	12	534	12	534	522	-	0	0	2842	0	0	194	0	0	0	0	0
OP_F086-OP_R051	Bacteria	C1-C4	19.59	43718	179425	75.16	578	191	12	537	12	537	525	-	0	0	2842	0	0	194	0	0	0	0	0
OP_F086-OP_R054	Bacteria	C1-C3	20.06	44758	178385	79.32	610	159	12	359	12	356	347	-	0	0	2842	0	0	194	0	0	0	0	0
OP_F086-OP_R100	Bacteria	C1-C4	19.6	43747	179396	75.29	579	190	12	536	12	536	524	-	0	0	2842	0	0	194	0	0	0	0	0
OP_F086-OP_R102	Bacteria	C1-C4	19.89	44383	178760	79.19	609	160	12	537	12	537	525	-	0	0	2842	0	0	194	0	0	0	0	0
OP_F086-OP_R115	Bacteria	C1-C4	19.64	43815	179328	75.29	579	190	12	537	12	537	525	-	0	0	2842	0	0	194	0	0	0	0	0
OP_F086-OP_R116	Bacteria	C1-C3	20.06	44761	178382	79.32	610	159	12	359	12	356	347	-	0	0	2842	0	0	194	0	0	0	0	0
OP_F086-OP_R146	Bacteria	C1-C4	20.17	45002	178141	82.18	632	137	12	531	12	532	520	-	0	0	2842	0	0	194	0	0	0	0	0
OP_F091-KP_R002	Bacteria	C1-C4	13.2	29455	193688	73.21	563	206	8	535	8	534	527	-	0	0	2842	0	0	194	0	0	0	0	0
OP_F091-KP_R018	Bacteria	C1-C3	13.26	29584	193559	72.82	560	209	8	360	8	357	352	-	0	0	2842	0	0	194	0	0	0	0	0
OP_F091-KP_R020	Bacteria	C1-C3	13.31	29695	193448	74.12	570	199	8	361	8	358	353	-	0	0	2842	0	0	194	0	0	0	0	0
OP_F091-KP_R021	Bacteria	C1-C4	13.18	29404	193739	73.08	562	207	8	535	8	534	527	-	0	0	2842	0	0	194	0	0	0	0	0
OP_F091-KP_R022	Bacteria	C1-C4	13.06	29148	193995	69.31	533	236	8	536	8	535	528	-	0	0	2842	0	0	194	0	0	0	0	0
OP_F091-KP_R023	Bacteria	C1-C4	13.07	29159	193984	69.31	533	236	8	536	8	535	528	-	0	0	2842	0	0	194	0	0	0	0	0
OP_F091-KP_R025	Bacteria	C1-C4	13.07	29163	193980	69.57	535	234	8	536	8	535	528	-	0	0	2842	0	0	194	0	0	0	0	0
OP_F091-KP_R070	Bacteria	C1-C4	13.06	29146	193997	69.31	533	236	8	538	8	537	530	-	0	0	2842	0	0	194	0	0	0	0	0
OP_F091-KP_R071	Bacteria	C1-C4	13.3	29682	193461	75.55	581	188	8	533	8	532	525	-	0	0	2842	0	0	194	0	0	0	0	0
OP_F091-OP_R019	Bacteria	C1-C4	12.24	27314	195829	70.74	544	225	8	536	8	534	528	-	0	0	2842	0	0	194	0	0	0	0	0
OP_F091-OP_R028	Bacteria	C1-C3	13.15	29350	193793	69.05	531	238	8	365	8	362	357	-	0	0	2842	0	0	194	0	0	0	0	0
OP_F091-OP_R038	Bacteria	C1-C4	13.18	29412	193731	73.08	562	207	8	534	8	533	526	-	0	0	2842	0	0	194	0	0	0	0	0
OP_F091-OP_R040	Bacteria	C1-C4	13.29	29647	193496	75.42	580	189	8	533	8	532	525	-	0	0	2842	0	0	194	0	0	0	0	0
OP_F091-OP_R043	Bacteria	C1-C4	13.33	29736	193407	75.68	582	187	8	532	8	531	524	-	0	0	2842	0	0	194	0	0	0	0	0
OP_F091-OP_R045	Bacteria	C1-C4	13.07	29175	193968	69.31	533	236	8	536	8	535	528	-	0	0	2842	0	0	194	0	0	0	0	0
OP_F091-OP_R047	Bacteria	C1-C4	12.24	27306	195837	70.74	544	225	8	536	8	534	528	-	0	0	2842	0	0	194	0	0	0	0	0
OP_F091-OP_R051	Bacteria	C1-C4	13.04	29097	194046	69.18	532	237	8	538	8	537	530	-	0	0	2842	0	0	194	0	0	0	0	0
OP_F091-OP_R054	Bacteria	C1-C3	13.27	29609	193534	72.82	560	209	8	359	8	356	351	-	0	0	2842	0	0	194	0	0	0	0	0
OP_F091-OP_R100	Bacteria	C1-C4	13.05	29110	194033	69.18	532	237	8	537	8	536	529	-	0	0	2842	0	0	194	0	0	0	0	0
OP_F091-OP_R102	Bacteria	C1-C4	13.19	29437	193706	73.21	563	206	8	538	8	537	530	-	0	0	2842	0	0	194	0	0	0	0	0
OP_F091-OP_R115	Bacteria	C1-C4	13.06	29138	194005	69.31	533	236	8	538	8	537	530	-	0	0	2842	0	0	194	0	0	0	0	0
OP_F091-OP_R116	Bacteria	C1-C3	13.27	29612	193531	72.82	560	209	8	359	8	356	351	-	0	0	2842	0	0	194	0	0	0	0	0
OP_F091-OP_R146	Bacteria	C1-C4	13.3	29674	193469	75.55	581	188	8	533	8	532	525	-	0	0	2842	0	0	194	0	0	0	0	0
OP_F096-KP_R029	Bacteria	C3-C5	89.06	198721	24422	83.75	644	125	341	804	346	814	463	-	0	0	2842	0	0	194	0	0	0	0	0
OP_F096-KP_R030	Bacteria	C3-C5	90.39	201689	21454	85.05	654	115	341	796	346	806	455	-	0	0	2842	0	0	194	0	0	0	0	0
OP_F096-KP_R031	Bacteria	C3-C5	96.5	215331	7812	95.71	736	33	341	800	333	810	459	-	0	0	2842	0	0	194	0	0	0	0	0
OP_F096-KP_R032	Bacteria	C3-C5	93.42	208465	14678	94.28	725	44	341	801	346	810	459	-	0	0	2842	0	0	194	0	0	0	0	0
OP_F096-KP_R033	Bacteria	C3-C5	90.07	200980	22163	84.4	649	120	341	801	346	811	460	-	0	0	2842	0	0	194	0	0	0	0	0
OP_F096-KP_R034	Bacteria	C3-C5	92.87	207235	15908	91.42	703	66	341	802	346	811	460	-	0	0	2842	0	0	194	0	0	0	0	0
OP_F096-KP_R035	Bacteria	C3-C5	93.16	207874	15269	94.15	724	45	341	804	346	813	462	-	0	0	2842	0	0	194	0	0	0	0	0
OP_F096-KP_R036	Bacteria	C3-C5	89.94	200702	22441	84.4	649	120	341	803	346	813	462	-	0	0	2842	0	0	194	0	0	0	0	0
OP_F096-KP_R037	Bacteria	C3-C5	89.63	199998	23145	84.27	648	121	341	804	346	814	463	-	0	0	2842	0	0	194	0	0	0	0	0
OP_F096-KP_R038	Bacteria	C3-C5	92.91	207324	15819	93.89	722	47	341	805	346	814	463	-	0	0	2842	0	0	194	0	0	0	0	0
OP_F096-KP_R039	Bacteria	C3-C6	75.45	168367	54776	81.79	629	140	343	925	346	935	582	-	0	0	2842	0	0	194	0	0	0	0	0
OP_F096-KP_R040	Bacteria	C3-C6	90.97	203000	20143	87.39	672	97	341	925	333	935	583	-	0	0	2842	0	0	194	0	0	0	0	0
OP_F096-KP_R041	Bacteria	C3-C6	91.17	203439	19704	87.39	672	97	341	924	333	934	582	-	0	0	2842	0	0	194	0	0	0	0	0
OP_F096-OP_R010	Bacteria	C3-C5	92.91	207329	15814	93.89	722	47	341	805	346	814	463	-	0	0	2842	0	0	194	0	0	0	0	0
OP_F096-OP_R014	Bacteria	C3-C5	92.91	207333	15810	93.89	722	47	341	805	346	814	463	-	0	0	2842	0	0	194	0	0	0	0	0
OP_F096-OP_R020	Bacteria	C3-C5	93.25	208088	15055	94.15	724	45	341	804	346	813	462	-	0	0	2842	0	0	194	0	0	0	0	0
OP_F096-OP_R032	Bacteria	C3-C5	93.4	208425	14718	93.89	722	47	341	801	346	810	459	-	0	0	2842	0	0	194	0	0	0	0	0
OP_F096-OP_R036	Bacteria	C3-C5	93	207529	15614	94.02	723	46	341	805	346	814	463	-	0	0	2842	0	0	194	0	0	0	0	0
OP_F096-OP_R048	Bacteria	C3-C5	92.82	207123	16020	93.89	722	47	341	805	346	814	463	-	0	0	2842	0	0	194	0	0	0	0	0
OP_F096-OP_R050	Bacteria	C3-C6	91.04	203152	19991	88.3	679	90	341	925	333	935	583	-	0	0	2842	0	0	194	0	0	0	0	0
OP_F096-OP_R052	Bacteria	C3-C6	91.32	203774	19369	88.3	679	90	341	925	333	935	583	-	0	0	2842	0	0	194	0	0	0	0	0
OP_F096-OP_R066	Bacteria	C3-C5	89.77	200323	22820	85.31	656	113	341	804	346	814	463	-	0	0	2842	0	0	194	0	0	0	0	0
OP_F096-OP_R067	Bacteria	C3-C6	91.48	204136	19007	88.3	679	90	341	925	333	935	583	-	0	0	2842	0	0	194	0	0	0	0	0
OP_F096-OP_R070	Bacteria	C3-C5	96.23	214727	8416	95.58	735	34	341	803	333	813	462	-	0	0	2842	0	0	194	0	0	0	0	0
OP_F096-OP_R073	Bacteria	C3-C6	95.84	213859	9284	94.8	729	40	341	892	333	903	551	-	0	0	2842	0	0	194	0	0	0	0	0
OP_F096-OP_R079	Bacteria	C3-C5	92.92	207337	15806	85.83	660	109	341	802	333	813	462	-	0	0	2842	0	0	194	0	0	0	0	0
OP_F096-OP_R086	Bacteria	C3-C5	89.62	199980	23163	84.01	646	123	341	800	346	810	459	-	0	0	2842	0	0	194	0	0	0	0	0
OP_F096-OP_R088	Bacteria	C3-C5	89.54	199800	23343	84.27	648	121	341	804	346	814	463	-	0	0	2842	0	0	194	0	0	0	0	0
OP_F096-OP_R089	Bacteria	C3-C6	79.51	177421	45722	84.14	647	122	343	925	346	935	582	-	0	0	2842	0	0	194	0	0	0	0	0
OP_F096-OP_R108	Bacteria	C3-C6	75.39	168219	54924	80.88	622	147	343	925	346	935	582	-	0	0	2842	0	0	194	0	0	0	0	0
OP_F096-OP_R119	Bacteria	C3-C5	95.63	213391	9752	92.59	712	57	341	804	333	814	463	-	0	0	2842	0	0	194	0	0	0	0	0
OP_F096-OP_R139	Bacteria	C3-C5	89.18	199010	24133	83.75	644	125	341	804	346	814	463	-	0	0	2842	0	0	194	0	0	0	0	0
OP_F096-OP_R143	Bacteria	C3-C6	75.56	168607	54536	80.88	622	147	343	924	346	934	581	-	0	0	2842	0	0	194	0	0	0	0	0
OP_F096-OP_UI005	Bacteria	C3-C6	75.48	168424	54719	80.88	622	147	343	925	346	935	582	-	0	0	2842	0	0	194	0	0	0	0	0
OP_F098-KP_R039	Bacteria	C4-C6	72.84	162531	60612	84.01	646	123	517	926	525	935	409	-	0	0	2842	0	0	194	0	0	0	0	0
OP_F098-KP_R040	Bacteria	C4-C6	88.36	197161	25982	89.6	689	80	516	925	525	935	409	-	0	0	2842	0	0	194	0	0	0	0	0
OP_F098-KP_R041	Bacteria	C4-C6	88.55	197590	25553	89.6	689	80	516	924	525	934	408	-	0	0	2842	0	0	194	0	0	0	0	0
OP_F098-KP_R046	Bacteria	C4-C7	88.05	196471	26672	88.95	684	85	515	1062	525	1075	547	-	0	0	2842	0	0	194	0	0	0	0	0
OP_F098-KP_R050	Bacteria	C4-C7	90.12	201103	22040	92.07	708	61	515	1062	525	1075	547	V3-V6	1.72	49	2793	3.61	7	187	450	995	461	1006	545
OP_F098-KP_R053	Bacteria	C4-C7	92.94	207401	15742	93.24	717	52	516	1076	525	1088	560	-	0	0	2842	0	0	194	0	0	0	0	0
OP_F098-KP_R054	Bacteria	C4-C7	84.34	188193	34950	90.25	694	75	516	1078	525	1090	562	-	0	0	2842	0	0	194	0	0	0	0	0
OP_F098-KP_R055	Bacteria	C4-C7	84.15	187785	35358	90.25	694	75	516	1079	525	1091	563	-	0	0	2842	0	0	194	0	0	0	0	0
OP_F098-KP_R056	Bacteria	C4-V7	88.59	197682	25461	80.75	621	148	516	1113	525	1125	598	-	0	0	2842	0	0	194	0	0	0	0	0
OP_F098-KP_R057	Bacteria	C4-V7	85.42	190606	32537	79.71	613	156	516	1113	525	1125	598	-	0	0	2842	0	0	194	0	0	0	0	0
OP_F098-KP_R074	Bacteria	C4-V7	93.76	209227	13916	95.58	735	34	516	1113	525	1125	597	V3-V6	3.24	92	2750	9.79	19	175	448	1043	445	1040	595
OP_F098-OP_R026	Bacteria	C4-V7	85.07	189819	33324	78.15	601	168	516	1113	525	1125	598	-	0	0	2842	0	0	194	0	0	0	0	0
OP_F098-OP_R030	Bacteria	C4-C7	93.19	207943	15200	95.71	736	33	516	1079	525	1091	563	-	0	0	2842	0	0	194	0	0	0	0	0
OP_F098-OP_R050	Bacteria	C4-C6	88.42	197309	25834	90.51	696	73	516	925	525	935	409	-	0	0	2842	0	0	194	0	0	0	0	0
OP_F098-OP_R052	Bacteria	C4-C6	88.69	197916	25227	90.51	696	73	516	925	525	935	409	-	0	0	2842	0	0	194	0	0	0	0	0
OP_F098-OP_R067	Bacteria	C4-C6	88.86	198276	24867	90.51	696	73	516	925	525	935	409	-	0	0	2842	0	0	194	0	0	0	0	0
OP_F098-OP_R073	Bacteria	C4-C6	92.83	207152	15991	95.71	736	33	516	893	525	903	377	V3-C5	3.24	92	2750	9.79	19	175	448	829	445	826	381
OP_F098-OP_R089	Bacteria	C4-C6	76.91	171624	51519	86.61	666	103	516	925	525	935	409	-	0	0	2842	0	0	194	0	0	0	0	0
OP_F098-OP_R108	Bacteria	C4-C6	72.77	162387	60756	83.09	639	130	517	926	525	935	409	-	0	0	2842	0	0	194	0	0	0	0	0
OP_F098-OP_R143	Bacteria	C4-C6	72.94	162765	60378	83.09	639	130	517	925	525	934	408	-	0	0	2842	0	0	194	0	0	0	0	0
OP_F098-OP_UI005	Bacteria	C4-C6	72.86	162583	60560	83.09	639	130	517	926	525	935	409	-	0	0	2842	0	0	194	0	0	0	0	0
OP_F098-OP_UI009	Bacteria	C4-C7	87.34	194905	28238	87.65	674	95	515	1073	525	1085	557	-	0	0	2842	0	0	194	0	0	0	0	0
OP_F100-KP_R039	Bacteria	C4-C6	72.69	162203	60940	84.01	646	123	514	926	522	935	412	V3-C6	0.14	4	2838	1.03	2	192	451	868	455	871	416
OP_F100-KP_R040	Bacteria	C4-C6	88.18	196768	26375	89.6	689	80	513	925	522	935	412	-	0	0	2842	0	0	194	0	0	0	0	0
OP_F100-KP_R041	Bacteria	C4-C6	88.37	197196	25947	89.6	689	80	513	924	522	934	411	-	0	0	2842	0	0	194	0	0	0	0	0
OP_F100-KP_R046	Bacteria	C4-C7	87.86	196046	27097	88.82	683	86	512	1062	522	1075	550	V3-C6	0.14	4	2838	2.06	4	190	446	994	446	994	548
OP_F100-KP_R050	Bacteria	C4-C7	89.93	200665	22478	91.94	707	62	512	1062	522	1075	550	V3-C6	26.67	758	2084	11.34	22	172	446	994	446	994	548
OP_F100-KP_R053	Bacteria	C4-C7	92.74	206948	16195	93.11	716	53	513	1076	522	1088	563	V3-V6	0.6	17	2825	3.61	7	187	678	1285	457	1018	607
OP_F100-KP_R054	Bacteria	C4-C7	84.15	187769	35374	90.12	693	76	513	1078	522	1090	565	V3-V6	0.6	17	2825	3.61	7	187	678	1287	457	1020	609
OP_F100-KP_R055	Bacteria	C4-C7	83.96	187359	35784	90.12	693	76	513	1079	522	1091	566	V3-V6	0.6	17	2825	3.61	7	187	678	1288	457	1021	610
OP_F100-OP_R030	Bacteria	C4-C7	92.98	207487	15656	95.58	735	34	513	1079	522	1091	566	V3-V6	0.6	17	2825	3.61	7	187	678	1288	457	1021	610
OP_F100-OP_R050	Bacteria	C4-C6	88.25	196916	26227	90.51	696	73	513	925	522	935	412	V3-C6	0.14	4	2838	1.03	2	192	451	868	455	871	416
OP_F100-OP_R052	Bacteria	C4-C6	88.52	197521	25622	90.51	696	73	513	925	522	935	412	V3-C6	0.14	4	2838	1.03	2	192	451	868	455	871	416
OP_F100-OP_R067	Bacteria	C4-C6	88.68	197879	25264	90.51	696	73	513	925	522	935	412	V3-C6	0.14	4	2838	1.03	2	192	451	868	455	871	416
OP_F100-OP_R089	Bacteria	C4-C6	76.74	171240	51903	86.48	665	104	513	925	522	935	412	V3-C6	0.14	4	2838	1.03	2	192	451	868	455	871	416
OP_F100-OP_R108	Bacteria	C4-C6	72.63	162059	61084	83.09	639	130	514	926	522	935	412	-	0	0	2842	0	0	194	0	0	0	0	0
OP_F100-OP_R143	Bacteria	C4-C6	72.79	162436	60707	83.09	639	130	514	925	522	934	411	-	0	0	2842	0	0	194	0	0	0	0	0
OP_F100-OP_UI005	Bacteria	C4-C6	72.71	162254	60889	83.09	639	130	514	926	522	935	412	-	0	0	2842	0	0	194	0	0	0	0	0
OP_F100-OP_UI009	Bacteria	C4-C7	87.15	194481	28662	87.52	673	96	512	1073	522	1085	560	-	0	0	2842	0	0	194	0	0	0	0	0
OP_F101-KP_R060	Bacteria	C6-C9	31.9	71179	151964	88.69	682	87	918	1409	917	1414	491	-	0	0	2842	0	0	194	0	0	0	0	0
OP_F101-KP_R061	Bacteria	C6-C9	31.32	69889	153254	88.69	682	87	918	1409	917	1414	491	-	0	0	2842	0	0	194	0	0	0	0	0
OP_F101-KP_R062	Bacteria	C6-C9	31.36	69984	153159	88.69	682	87	918	1409	917	1414	491	-	0	0	2842	0	0	194	0	0	0	0	0
OP_F101-KP_R063	Bacteria	C6-C10	5.08	11327	211816	73.99	569	200	915	1506	925	1503	591	-	0	0	2842	0	0	194	0	0	0	0	0
OP_F101-KP_R066	Bacteria	C6-C10	4.83	10772	212371	73.21	563	206	915	1507	925	1504	592	-	0	0	2842	0	0	194	0	0	0	0	0
OP_F101-KP_R075	Bacteria	C6-C9	31.23	69695	153448	88.69	682	87	918	1408	917	1413	490	-	0	0	2842	0	0	194	0	0	0	0	0
OP_F101-KP_R076	Bacteria	C6-C9	31.82	70997	152146	88.69	682	87	918	1408	917	1413	490	-	0	0	2842	0	0	194	0	0	0	0	0
OP_F101-KP_R077	Bacteria	C6-C9	27.51	61391	161752	88.43	680	89	918	1409	924	1414	491	-	0	0	2842	0	0	194	0	0	0	0	0
OP_F101-KP_R078	Bacteria	C6-C9	31.51	70317	152826	88.69	682	87	918	1408	917	1413	490	-	0	0	2842	0	0	194	0	0	0	0	0
OP_F101-OP_R055	Bacteria	C6-C9	79.21	176746	46397	72.17	555	214	917	1387	925	1397	471	-	0	0	2842	0	0	194	0	0	0	0	0
OP_F101-OP_R101	Bacteria	C6-C9	79.41	177207	45936	72.17	555	214	917	1386	925	1393	470	-	0	0	2842	0	0	194	0	0	0	0	0
OP_F101-OP_R121	Bacteria	C6-C9	32.1	71637	151506	88.69	682	87	918	1408	917	1413	490	-	0	0	2842	0	0	194	0	0	0	0	0
OP_F108-KP_R029	Bacteria	C3-C5	89.08	198778	24365	83.75	644	125	342	804	347	814	462	-	0	0	2842	0	0	194	0	0	0	0	0
OP_F108-KP_R030	Bacteria	C3-C5	90.41	201747	21396	85.05	654	115	342	796	347	806	454	-	0	0	2842	0	0	194	0	0	0	0	0
OP_F108-KP_R031	Bacteria	C3-C5	96.53	215392	7751	95.71	736	33	342	800	334	810	458	-	0	0	2842	0	0	194	0	0	0	0	0
OP_F108-KP_R032	Bacteria	C3-C5	93.45	208522	14621	94.28	725	44	342	801	347	810	458	-	0	0	2842	0	0	194	0	0	0	0	0
OP_F108-KP_R033	Bacteria	C3-C5	90.09	201037	22106	84.4	649	120	342	801	347	811	459	-	0	0	2842	0	0	194	0	0	0	0	0
OP_F108-KP_R034	Bacteria	C3-C5	92.9	207292	15851	91.42	703	66	342	802	347	811	459	-	0	0	2842	0	0	194	0	0	0	0	0
OP_F108-KP_R035	Bacteria	C3-C5	93.18	207931	15212	94.15	724	45	342	804	347	813	461	-	0	0	2842	0	0	194	0	0	0	0	0
OP_F108-KP_R036	Bacteria	C3-C5	89.97	200759	22384	84.4	649	120	342	803	347	813	461	-	0	0	2842	0	0	194	0	0	0	0	0
OP_F108-KP_R037	Bacteria	C3-C5	89.65	200055	23088	84.27	648	121	342	804	347	814	462	-	0	0	2842	0	0	194	0	0	0	0	0
OP_F108-KP_R038	Bacteria	C3-C5	92.94	207381	15762	93.89	722	47	342	805	347	814	462	-	0	0	2842	0	0	194	0	0	0	0	0
OP_F108-KP_R039	Bacteria	C3-C6	75.48	168423	54720	81.79	629	140	344	925	347	935	581	-	0	0	2842	0	0	194	0	0	0	0	0
OP_F108-KP_R040	Bacteria	C3-C6	91	203060	20083	87.39	672	97	342	925	334	935	582	-	0	0	2842	0	0	194	0	0	0	0	0
OP_F108-KP_R041	Bacteria	C3-C6	91.2	203499	19644	87.39	672	97	342	924	334	934	581	-	0	0	2842	0	0	194	0	0	0	0	0
OP_F108-OP_R010	Bacteria	C3-C5	92.94	207386	15757	93.89	722	47	342	805	347	814	462	-	0	0	2842	0	0	194	0	0	0	0	0
OP_F108-OP_R014	Bacteria	C3-C5	92.94	207390	15753	93.89	722	47	342	805	347	814	462	-	0	0	2842	0	0	194	0	0	0	0	0
OP_F108-OP_R020	Bacteria	C3-C5	93.28	208145	14998	94.15	724	45	342	804	347	813	461	-	0	0	2842	0	0	194	0	0	0	0	0
OP_F108-OP_R032	Bacteria	C3-C5	93.43	208482	14661	93.89	722	47	342	801	347	810	458	-	0	0	2842	0	0	194	0	0	0	0	0
OP_F108-OP_R036	Bacteria	C3-C5	93.03	207586	15557	94.02	723	46	342	805	347	814	462	-	0	0	2842	0	0	194	0	0	0	0	0
OP_F108-OP_R048	Bacteria	C3-C5	92.85	207180	15963	93.89	722	47	342	805	347	814	462	-	0	0	2842	0	0	194	0	0	0	0	0
OP_F108-OP_R050	Bacteria	C3-C6	91.07	203212	19931	88.3	679	90	342	925	334	935	582	-	0	0	2842	0	0	194	0	0	0	0	0
OP_F108-OP_R052	Bacteria	C3-C6	91.35	203834	19309	88.3	679	90	342	925	334	935	582	-	0	0	2842	0	0	194	0	0	0	0	0
OP_F108-OP_R066	Bacteria	C3-C5	89.8	200380	22763	85.31	656	113	342	804	347	814	462	-	0	0	2842	0	0	194	0	0	0	0	0
OP_F108-OP_R067	Bacteria	C3-C6	91.51	204196	18947	88.3	679	90	342	925	334	935	582	-	0	0	2842	0	0	194	0	0	0	0	0
OP_F108-OP_R070	Bacteria	C3-C5	96.26	214788	8355	95.58	735	34	342	803	334	813	461	-	0	0	2842	0	0	194	0	0	0	0	0
OP_F108-OP_R073	Bacteria	C3-C6	95.87	213920	9223	94.8	729	40	342	892	334	903	550	-	0	0	2842	0	0	194	0	0	0	0	0
OP_F108-OP_R079	Bacteria	C3-C5	92.94	207398	15745	85.83	660	109	342	802	334	813	461	-	0	0	2842	0	0	194	0	0	0	0	0
OP_F108-OP_R086	Bacteria	C3-C5	89.64	200037	23106	84.01	646	123	342	800	347	810	458	-	0	0	2842	0	0	194	0	0	0	0	0
OP_F108-OP_R088	Bacteria	C3-C5	89.56	199857	23286	84.27	648	121	342	804	347	814	462	-	0	0	2842	0	0	194	0	0	0	0	0
OP_F108-OP_R089	Bacteria	C3-C6	79.54	177480	45663	84.14	647	122	344	925	347	935	581	-	0	0	2842	0	0	194	0	0	0	0	0
OP_F108-OP_R108	Bacteria	C3-C6	75.41	168275	54868	80.88	622	147	344	925	347	935	581	-	0	0	2842	0	0	194	0	0	0	0	0
OP_F108-OP_R119	Bacteria	C3-C5	95.66	213452	9691	92.59	712	57	342	804	334	814	462	-	0	0	2842	0	0	194	0	0	0	0	0
OP_F108-OP_R139	Bacteria	C3-C5	89.21	199067	24076	83.75	644	125	342	804	347	814	462	-	0	0	2842	0	0	194	0	0	0	0	0
OP_F108-OP_R143	Bacteria	C3-C6	75.58	168663	54480	80.88	622	147	344	924	347	934	580	-	0	0	2842	0	0	194	0	0	0	0	0
OP_F108-OP_UI005	Bacteria	C3-C6	75.5	168480	54663	80.88	622	147	344	925	347	935	581	-	0	0	2842	0	0	194	0	0	0	0	0
OP_F113-KP_R002	Bacteria	C1-C4	10.37	23131	200012	72.43	557	212	9	535	9	541	527	-	0	0	2842	0	0	194	0	0	0	0	0
OP_F113-KP_R018	Bacteria	C1-C3	10.43	23268	199875	72.3	556	213	9	361	9	363	352	-	0	0	2842	0	0	194	0	0	0	0	0
OP_F113-KP_R020	Bacteria	C1-C3	10.48	23384	199759	73.73	567	202	9	362	9	364	353	-	0	0	2842	0	0	194	0	0	0	0	0
OP_F113-KP_R021	Bacteria	C1-C4	10.34	23082	200061	72.3	556	213	9	535	9	541	527	-	0	0	2842	0	0	194	0	0	0	0	0
OP_F113-KP_R022	Bacteria	C1-C4	10.23	22837	200306	68.92	530	239	9	536	9	542	528	-	0	0	2842	0	0	194	0	0	0	0	0
OP_F113-KP_R023	Bacteria	C1-C4	10.24	22843	200300	68.92	530	239	9	536	9	542	528	-	0	0	2842	0	0	194	0	0	0	0	0
OP_F113-KP_R025	Bacteria	C1-C4	10.24	22852	200291	69.18	532	237	9	536	9	542	528	-	0	0	2842	0	0	194	0	0	0	0	0
OP_F113-KP_R070	Bacteria	C1-C4	10.24	22840	200303	68.79	529	240	9	538	9	544	530	-	0	0	2842	0	0	194	0	0	0	0	0
OP_F113-KP_R071	Bacteria	C1-C4	10.47	23374	199769	75.03	577	192	9	533	9	539	525	-	0	0	2842	0	0	194	0	0	0	0	0
OP_F113-OP_R019	Bacteria	C1-C4	9.8	21878	201265	70.09	539	230	9	536	9	541	527	-	0	0	2842	0	0	194	0	0	0	0	0
OP_F113-OP_R028	Bacteria	C1-C3	10.33	23050	200093	69.18	532	237	9	366	9	368	357	-	0	0	2842	0	0	194	0	0	0	0	0
OP_F113-OP_R038	Bacteria	C1-C4	10.35	23090	200053	72.3	556	213	9	534	9	540	526	-	0	0	2842	0	0	194	0	0	0	0	0
OP_F113-OP_R040	Bacteria	C1-C4	10.46	23337	199806	74.9	576	193	9	533	9	539	525	-	0	0	2842	0	0	194	0	0	0	0	0
OP_F113-OP_R043	Bacteria	C1-C4	10.5	23426	199717	75.16	578	191	9	532	9	538	524	-	0	0	2842	0	0	194	0	0	0	0	0
OP_F113-OP_R045	Bacteria	C1-C4	10.24	22861	200282	68.92	530	239	9	536	9	542	528	-	0	0	2842	0	0	194	0	0	0	0	0
OP_F113-OP_R047	Bacteria	C1-C4	9.8	21871	201272	70.09	539	230	9	536	9	541	527	-	0	0	2842	0	0	194	0	0	0	0	0
OP_F113-OP_R051	Bacteria	C1-C4	10.21	22794	200349	68.66	528	241	9	538	9	544	530	-	0	0	2842	0	0	194	0	0	0	0	0
OP_F113-OP_R054	Bacteria	C1-C3	10.44	23288	199855	72.3	556	213	9	360	9	362	351	-	0	0	2842	0	0	194	0	0	0	0	0
OP_F113-OP_R100	Bacteria	C1-C4	10.22	22808	200335	68.79	529	240	9	537	9	543	529	-	0	0	2842	0	0	194	0	0	0	0	0
OP_F113-OP_R102	Bacteria	C1-C4	10.36	23119	200024	72.3	556	213	9	538	9	544	530	-	0	0	2842	0	0	194	0	0	0	0	0
OP_F113-OP_R115	Bacteria	C1-C4	10.23	22833	200310	68.79	529	240	9	538	9	544	530	-	0	0	2842	0	0	194	0	0	0	0	0
OP_F113-OP_R116	Bacteria	C1-C3	10.44	23288	199855	72.3	556	213	9	360	9	362	351	-	0	0	2842	0	0	194	0	0	0	0	0
OP_F113-OP_R146	Bacteria	C1-C4	10.47	23367	199776	75.03	577	192	9	533	9	539	525	-	0	0	2842	0	0	194	0	0	0	0	0
OP_F114-KP_R029	Bacteria	C3-C5	89.46	199625	23518	83.75	644	125	343	804	348	814	461	-	0	0	2842	0	0	194	0	0	0	0	0
OP_F114-KP_R030	Bacteria	C3-C5	90.79	202603	20540	85.05	654	115	343	796	348	806	453	C3-C5	0.07	2	2840	0.52	1	193	337	749	337	749	412
OP_F114-KP_R033	Bacteria	C3-C5	90.48	201894	21249	84.4	649	120	343	801	348	811	458	C3-C5	0.21	6	2836	0.52	1	193	320	743	320	743	423
OP_F114-KP_R034	Bacteria	C3-C5	93.29	208176	14967	91.42	703	66	343	802	348	811	458	C3-C5	1.83	52	2790	5.15	10	184	420	838	313	731	418
OP_F114-KP_R036	Bacteria	C3-C5	90.35	201617	21526	84.4	649	120	343	803	348	813	460	C3-C5	0.21	6	2836	0.52	1	193	320	745	320	745	425
OP_F114-KP_R037	Bacteria	C3-C5	90.04	200908	22235	84.27	648	121	343	804	348	814	461	C3-C5	0.21	6	2836	0.52	1	193	320	746	320	746	426
OP_F114-KP_R039	Bacteria	C3-C6	75.81	169163	53980	81.79	629	140	345	925	348	935	580	C3-C6	0.14	4	2838	1.03	2	192	320	868	323	871	547
OP_F114-KP_R040	Bacteria	C3-C6	91.39	203921	19222	87.39	672	97	343	925	335	935	581	-	0	0	2842	0	0	194	0	0	0	0	0
OP_F114-KP_R041	Bacteria	C3-C6	91.58	204362	18781	87.39	672	97	343	924	335	934	580	-	0	0	2842	0	0	194	0	0	0	0	0
OP_F114-OP_R050	Bacteria	C3-C6	91.45	204073	19070	88.3	679	90	343	925	335	935	581	C3-C6	0.14	4	2838	1.03	2	192	320	868	323	871	547
OP_F114-OP_R052	Bacteria	C3-C6	91.73	204699	18444	88.3	679	90	343	925	335	935	581	C3-C6	0.14	4	2838	1.03	2	192	320	868	323	871	547
OP_F114-OP_R066	Bacteria	C3-C5	90.18	201233	21910	85.31	656	113	343	804	348	814	461	C3-C5	0.28	8	2834	1.03	2	192	324	748	320	746	424
OP_F114-OP_R067	Bacteria	C3-C6	91.9	205065	18078	88.3	679	90	343	925	335	935	581	C3-C6	0.14	4	2838	1.03	2	192	320	868	323	871	547
OP_F114-OP_R079	Bacteria	C3-C5	93.34	208281	14862	85.83	660	109	343	802	335	813	460	C3-C5	0.21	6	2836	0.52	1	193	320	745	320	745	425
OP_F114-OP_R086	Bacteria	C3-C5	90.03	200889	22254	84.01	646	123	343	800	348	810	457	-	0	0	2842	0	0	194	0	0	0	0	0
OP_F114-OP_R088	Bacteria	C3-C5	89.95	200709	22434	84.27	648	121	343	804	348	814	461	C3-C5	0.21	6	2836	0.52	1	193	320	746	320	746	426
OP_F114-OP_R089	Bacteria	C3-C6	79.89	178261	44882	84.14	647	122	345	925	348	935	580	C3-C6	0.14	4	2838	1.03	2	192	320	868	323	871	547
OP_F114-OP_R108	Bacteria	C3-C6	75.74	169015	54128	80.88	622	147	345	925	348	935	580	-	0	0	2842	0	0	194	0	0	0	0	0
OP_F114-OP_R119	Bacteria	C3-C5	96.06	214361	8782	92.59	712	57	343	804	335	814	461	C3-C5	1.76	50	2792	4.12	8	186	430	851	313	734	421
OP_F114-OP_R139	Bacteria	C3-C5	89.59	199916	23227	83.75	644	125	343	804	348	814	461	-	0	0	2842	0	0	194	0	0	0	0	0
OP_F114-OP_R143	Bacteria	C3-C6	75.92	169404	53739	80.88	622	147	345	924	348	934	579	-	0	0	2842	0	0	194	0	0	0	0	0
OP_F114-OP_UI005	Bacteria	C3-C6	75.83	169220	53923	80.88	622	147	345	925	348	935	580	-	0	0	2842	0	0	194	0	0	0	0	0
OP_F116-KP_R060	Bacteria	C7-C9	33.29	74277	148866	94.02	723	46	1101	1408	1098	1414	308	-	0	0	2842	0	0	194	0	0	0	0	0
OP_F116-KP_R061	Bacteria	C7-C9	32.55	72625	150518	93.37	718	51	1101	1408	1098	1414	308	-	0	0	2842	0	0	194	0	0	0	0	0
OP_F116-KP_R062	Bacteria	C7-C9	32.59	72725	150418	93.37	718	51	1101	1408	1098	1414	308	-	0	0	2842	0	0	194	0	0	0	0	0
OP_F116-KP_R063	Bacteria	C7-C10	5.2	11602	211541	78.54	604	165	1098	1506	1095	1503	407	-	0	0	2842	0	0	194	0	0	0	0	0
OP_F116-KP_R066	Bacteria	C7-C10	4.95	11047	212096	77.5	596	173	1098	1507	1095	1504	408	-	0	0	2842	0	0	194	0	0	0	0	0
OP_F116-KP_R075	Bacteria	C7-C9	32.45	72413	150730	93.37	718	51	1101	1407	1098	1413	307	-	0	0	2842	0	0	194	0	0	0	0	0
OP_F116-KP_R076	Bacteria	C7-C9	33.2	74078	149065	94.02	723	46	1101	1407	1098	1413	307	-	0	0	2842	0	0	194	0	0	0	0	0
OP_F116-KP_R077	Bacteria	C7-C9	28.36	63289	159854	92.46	711	58	1101	1408	1107	1414	308	-	0	0	2842	0	0	194	0	0	0	0	0
OP_F116-KP_R078	Bacteria	C7-C9	32.75	73079	150064	93.37	718	51	1101	1407	1098	1413	307	-	0	0	2842	0	0	194	0	0	0	0	0
OP_F116-OP_R121	Bacteria	C7-C9	33.5	74764	148379	94.02	723	46	1101	1407	1098	1413	307	-	0	0	2842	0	0	194	0	0	0	0	0
OP_F118-KP_R056	Bacteria	C5-V7	85.27	190275	32868	72.17	555	214	781	1113	791	1125	332	-	0	0	2842	0	0	194	0	0	0	0	0
OP_F118-KP_R057	Bacteria	C5-V7	82.11	183226	39917	71.13	547	222	781	1113	791	1125	332	-	0	0	2842	0	0	194	0	0	0	0	0
OP_F118-KP_R074	Bacteria	C5-V7	90.4	201714	21429	86.35	664	105	781	1113	791	1125	331	-	0	0	2842	0	0	194	0	0	0	0	0
OP_F118-OP_R026	Bacteria	C5-V7	81.77	182464	40679	69.57	535	234	781	1113	791	1125	332	-	0	0	2842	0	0	194	0	0	0	0	0
OP_F118-OP_R029	Bacteria	C5-C8	87.35	194909	28234	79.97	615	154	781	1192	791	1204	411	-	0	0	2842	0	0	194	0	0	0	0	0
OP_UI001-KP_R002	Bacteria	C1-C4	13.24	29542	193601	73.34	564	205	8	535	8	534	527	-	0	0	2842	0	0	194	0	0	0	0	0
OP_UI001-KP_R018	Bacteria	C1-C3	13.3	29670	193473	72.95	561	208	8	360	8	357	352	-	0	0	2842	0	0	194	0	0	0	0	0
OP_UI001-KP_R020	Bacteria	C1-C3	13.35	29785	193358	74.25	571	198	8	361	8	358	353	-	0	0	2842	0	0	194	0	0	0	0	0
OP_UI001-KP_R021	Bacteria	C1-C4	13.22	29491	193652	73.21	563	206	8	535	8	534	527	-	0	0	2842	0	0	194	0	0	0	0	0
OP_UI001-KP_R022	Bacteria	C1-C4	13.1	29235	193908	69.44	534	235	8	536	8	535	528	-	0	0	2842	0	0	194	0	0	0	0	0
OP_UI001-KP_R023	Bacteria	C1-C4	13.11	29246	193897	69.44	534	235	8	536	8	535	528	-	0	0	2842	0	0	194	0	0	0	0	0
OP_UI001-KP_R025	Bacteria	C1-C4	13.11	29250	193893	69.7	536	233	8	536	8	535	528	-	0	0	2842	0	0	194	0	0	0	0	0
OP_UI001-KP_R070	Bacteria	C1-C4	13.1	29234	193909	69.44	534	235	8	538	8	537	530	-	0	0	2842	0	0	194	0	0	0	0	0
OP_UI001-KP_R071	Bacteria	C1-C4	13.34	29773	193370	75.68	582	187	8	533	8	532	525	-	0	0	2842	0	0	194	0	0	0	0	0
OP_UI001-OP_R019	Bacteria	C1-C4	12.28	27403	195740	70.87	545	224	8	536	8	534	528	-	0	0	2842	0	0	194	0	0	0	0	0
OP_UI001-OP_R028	Bacteria	C1-C3	13.19	29439	193704	69.18	532	237	8	365	8	362	357	-	0	0	2842	0	0	194	0	0	0	0	0
OP_UI001-OP_R038	Bacteria	C1-C4	13.22	29499	193644	73.21	563	206	8	534	8	533	526	-	0	0	2842	0	0	194	0	0	0	0	0
OP_UI001-OP_R040	Bacteria	C1-C4	13.33	29738	193405	75.55	581	188	8	533	8	532	525	-	0	0	2842	0	0	194	0	0	0	0	0
OP_UI001-OP_R043	Bacteria	C1-C4	13.37	29827	193316	75.81	583	186	8	532	8	531	524	-	0	0	2842	0	0	194	0	0	0	0	0
OP_UI001-OP_R045	Bacteria	C1-C4	13.11	29263	193880	69.44	534	235	8	536	8	535	528	-	0	0	2842	0	0	194	0	0	0	0	0
OP_UI001-OP_R047	Bacteria	C1-C4	12.28	27395	195748	70.87	545	224	8	536	8	534	528	-	0	0	2842	0	0	194	0	0	0	0	0
OP_UI001-OP_R051	Bacteria	C1-C4	13.08	29185	193958	69.31	533	236	8	538	8	537	530	-	0	0	2842	0	0	194	0	0	0	0	0
OP_UI001-OP_R054	Bacteria	C1-C3	13.31	29694	193449	72.95	561	208	8	359	8	356	351	-	0	0	2842	0	0	194	0	0	0	0	0
OP_UI001-OP_R100	Bacteria	C1-C4	13.08	29197	193946	69.31	533	236	8	537	8	536	529	-	0	0	2842	0	0	194	0	0	0	0	0
OP_UI001-OP_R102	Bacteria	C1-C4	13.23	29525	193618	73.34	564	205	8	538	8	537	530	-	0	0	2842	0	0	194	0	0	0	0	0
OP_UI001-OP_R115	Bacteria	C1-C4	13.1	29226	193917	69.44	534	235	8	538	8	537	530	-	0	0	2842	0	0	194	0	0	0	0	0
OP_UI001-OP_R116	Bacteria	C1-C3	13.31	29697	193446	72.95	561	208	8	359	8	356	351	-	0	0	2842	0	0	194	0	0	0	0	0
OP_UI001-OP_R146	Bacteria	C1-C4	13.34	29765	193378	75.68	582	187	8	533	8	532	525	-	0	0	2842	0	0	194	0	0	0	0	0
OP_UI006-KP_R039	Bacteria	C4-C6	72.35	161442	61701	78.41	603	166	518	926	526	935	408	-	0	0	2842	0	0	194	0	0	0	0	0
OP_UI006-KP_R040	Bacteria	C4-C6	87.84	196013	27130	84.01	646	123	517	925	526	935	408	-	0	0	2842	0	0	194	0	0	0	0	0
OP_UI006-KP_R041	Bacteria	C4-C6	88.03	196441	26702	84.01	646	123	517	924	526	934	407	-	0	0	2842	0	0	194	0	0	0	0	0
OP_UI006-KP_R046	Bacteria	C4-C7	87.52	195287	27856	83.22	640	129	516	1062	526	1075	546	-	0	0	2842	0	0	194	0	0	0	0	0
OP_UI006-KP_R050	Bacteria	C4-C7	89.59	199904	23239	86.35	664	105	516	1062	526	1075	546	V3-V6	1.72	49	2793	3.61	7	187	451	995	462	1006	544
OP_UI006-KP_R053	Bacteria	C4-C7	92.4	206187	16956	87.39	672	97	517	1076	526	1088	559	-	0	0	2842	0	0	194	0	0	0	0	0
OP_UI006-KP_R054	Bacteria	C4-C7	83.81	187012	36131	84.4	649	120	517	1078	526	1090	562	-	0	0	2842	0	0	194	0	0	0	0	0
OP_UI006-KP_R055	Bacteria	C4-C7	83.62	186603	36540	84.4	649	120	517	1079	526	1091	563	-	0	0	2842	0	0	194	0	0	0	0	0
OP_UI006-KP_R056	Bacteria	C4-V7	88.06	196495	26648	75.03	577	192	517	1113	526	1125	597	-	0	0	2842	0	0	194	0	0	0	0	0
OP_UI006-KP_R057	Bacteria	C4-V7	84.89	189425	33718	73.99	569	200	517	1113	526	1125	597	-	0	0	2842	0	0	194	0	0	0	0	0
OP_UI006-KP_R074	Bacteria	C4-V7	93.22	208008	15135	89.73	690	79	517	1113	526	1125	596	V3-C7	1.83	52	2790	4.12	8	186	452	1046	462	1056	594
OP_UI006-OP_R026	Bacteria	C4-V7	84.54	188640	34503	72.43	557	212	517	1113	526	1125	597	-	0	0	2842	0	0	194	0	0	0	0	0
OP_UI006-OP_R030	Bacteria	C4-C7	92.64	206731	16412	89.86	691	78	517	1079	526	1091	562	-	0	0	2842	0	0	194	0	0	0	0	0
OP_UI006-OP_R050	Bacteria	C4-C6	87.91	196161	26982	84.92	653	116	517	925	526	935	408	-	0	0	2842	0	0	194	0	0	0	0	0
OP_UI006-OP_R052	Bacteria	C4-C6	88.18	196766	26377	84.92	653	116	517	925	526	935	408	-	0	0	2842	0	0	194	0	0	0	0	0
OP_UI006-OP_R067	Bacteria	C4-C6	88.34	197125	26018	84.92	653	116	517	925	526	935	408	-	0	0	2842	0	0	194	0	0	0	0	0
OP_UI006-OP_R073	Bacteria	C4-C6	92.3	205972	17171	90.12	693	76	517	893	526	903	376	V3-V5	1.83	52	2790	4.12	8	186	452	832	462	842	380
OP_UI006-OP_R089	Bacteria	C4-C6	76.4	170478	52665	80.88	622	147	517	925	526	935	408	-	0	0	2842	0	0	194	0	0	0	0	0
OP_UI006-OP_R108	Bacteria	C4-C6	72.28	161298	61845	77.5	596	173	518	926	526	935	408	-	0	0	2842	0	0	194	0	0	0	0	0
OP_UI006-OP_R143	Bacteria	C4-C6	72.45	161675	61468	77.5	596	173	518	925	526	934	407	-	0	0	2842	0	0	194	0	0	0	0	0
OP_UI006-OP_UI005	Bacteria	C4-C6	72.37	161492	61651	77.5	596	173	518	926	526	935	408	-	0	0	2842	0	0	194	0	0	0	0	0
OP_UI006-OP_UI009	Bacteria	C4-C7	86.82	193731	29412	81.92	630	139	516	1073	526	1085	556	-	0	0	2842	0	0	194	0	0	0	0	0
KP_F015-KP_R005	Archaea	-	0	0	223143	0	0	769	0	0	0	0	0	C3-C5	58.69	1668	1174	75.77	147	47	329	747	324	746	419
KP_F015-KP_R006	Archaea	-	0	0	223143	0	0	769	0	0	0	0	0	C3-C6	59.15	1681	1161	75.26	146	48	329	872	324	871	543
KP_F015-KP_R007	Archaea	-	0	0	223143	0	0	769	0	0	0	0	0	C3-C6	58.37	1659	1183	71.13	138	56	329	877	324	878	548
KP_F015-KP_R008	Archaea	-	0	0	223143	0	0	769	0	0	0	0	0	C3-C6	58.34	1658	1184	71.13	138	56	329	873	324	874	544
KP_F015-KP_R010	Archaea	-	0	0	223143	0	0	769	0	0	0	0	0	C3-C6	57.42	1632	1210	73.71	143	51	329	922	324	921	594
KP_F015-KP_R031	Archaea	-	0	0	223143	0	0	769	0	0	0	0	0	C3-C5	58.94	1675	1167	75.77	147	47	329	743	324	742	415
KP_F015-KP_R032	Archaea	-	0	0	223143	0	0	769	0	0	0	0	0	C3-C5	58.97	1676	1166	75.77	147	47	329	743	324	742	415
KP_F015-KP_R035	Archaea	-	0	0	223143	0	0	769	0	0	0	0	0	C3-C5	58.9	1674	1168	75.77	147	47	329	746	324	745	418
KP_F015-KP_R038	Archaea	-	0	0	223143	0	0	769	0	0	0	0	0	C3-C5	58.87	1673	1169	75.77	147	47	329	747	324	746	419
KP_F015-KP_R072	Archaea	-	0	0	223143	0	0	769	0	0	0	0	0	C3-C6	59.29	1685	1157	75.26	146	48	329	867	324	866	538
KP_F015-OP_R010	Archaea	-	0	0	223143	0	0	769	0	0	0	0	0	C3-C5	58.87	1673	1169	75.77	147	47	329	747	324	746	419
KP_F015-OP_R012	Archaea	-	0	0	223143	0	0	769	0	0	0	0	0	C3-C6	58.48	1662	1180	71.65	139	55	329	877	324	878	548
KP_F015-OP_R014	Archaea	-	0	0	223143	0	0	769	0	0	0	0	0	C3-C5	58.9	1674	1168	75.77	147	47	329	747	324	746	419
KP_F015-OP_R020	Archaea	-	0	0	223143	0	0	769	0	0	0	0	0	C3-C5	58.9	1674	1168	75.77	147	47	329	746	324	745	418
KP_F015-OP_R032	Archaea	-	0	0	223143	0	0	769	0	0	0	0	0	C3-C5	58.34	1658	1184	72.16	140	54	329	740	324	742	412
KP_F015-OP_R036	Archaea	-	0	0	223143	0	0	769	0	0	0	0	0	C3-C5	58.9	1674	1168	75.77	147	47	329	747	324	746	419
KP_F015-OP_R048	Archaea	-	0	0	223143	0	0	769	0	0	0	0	0	C3-C5	58.9	1674	1168	75.77	147	47	329	747	324	746	419
KP_F015-OP_R070	Archaea	-	0	0	223143	0	0	769	0	0	0	0	0	C3-C5	58.9	1674	1168	75.77	147	47	329	746	324	745	418
KP_F015-OP_R073	Archaea	-	0	0	223143	0	0	769	0	0	0	0	0	C3-V5	57.74	1641	1201	72.16	140	54	329	839	324	838	511
KP_F016-KP_R005	Archaea	-	0	0	223143	0	0	769	0	0	0	0	0	C3-C5	63.72	1811	1031	93.81	182	12	324	752	314	746	428
KP_F016-KP_R006	Archaea	-	0	0	223143	0	0	769	0	0	0	0	0	C3-C6	63.51	1805	1037	91.75	178	16	323	876	314	871	553
KP_F016-KP_R007	Archaea	-	0	0	223143	0	0	769	0	0	0	0	0	C3-C6	63.16	1795	1047	89.18	173	21	323	882	314	878	558
KP_F016-KP_R008	Archaea	-	0	0	223143	0	0	769	0	0	0	0	0	C3-C6	62.7	1782	1060	87.63	170	24	323	878	314	874	554
KP_F016-KP_R031	Archaea	-	0	0	223143	0	0	769	0	0	0	0	0	C3-C5	64.04	1820	1022	94.85	184	10	323	747	314	742	424
KP_F016-KP_R032	Archaea	-	0	0	223143	0	0	769	0	0	0	0	0	C3-C5	64.14	1823	1019	95.36	185	9	323	747	314	742	424
KP_F016-KP_R035	Archaea	-	0	0	223143	0	0	769	0	0	0	0	0	C3-C5	64	1819	1023	94.85	184	10	323	750	314	745	427
KP_F016-KP_R038	Archaea	-	0	0	223143	0	0	769	0	0	0	0	0	C3-C5	63.9	1816	1026	93.81	182	12	324	751	314	746	428
KP_F016-KP_R072	Archaea	-	0	0	223143	0	0	769	0	0	0	0	0	C3-C6	63.79	1813	1029	92.27	179	15	323	871	314	866	548
KP_F016-OP_R010	Archaea	-	0	0	223143	0	0	769	0	0	0	0	0	C3-C5	63.9	1816	1026	93.81	182	12	324	751	314	746	428
KP_F016-OP_R012	Archaea	-	0	0	223143	0	0	769	0	0	0	0	0	C3-C6	63.27	1798	1044	89.69	174	20	323	882	314	878	558
KP_F016-OP_R014	Archaea	-	0	0	223143	0	0	769	0	0	0	0	0	C3-C5	64	1819	1023	94.33	183	11	324	751	314	746	428
KP_F016-OP_R020	Archaea	-	0	0	223143	0	0	769	0	0	0	0	0	C3-C5	64	1819	1023	94.85	184	10	323	750	314	745	427
KP_F016-OP_R032	Archaea	-	0	0	223143	0	0	769	0	0	0	0	0	C3-C5	60.91	1731	1111	85.57	166	28	322	744	314	742	422
KP_F016-OP_R036	Archaea	-	0	0	223143	0	0	769	0	0	0	0	0	C3-C5	64	1819	1023	94.33	183	11	324	751	314	746	428
KP_F016-OP_R048	Archaea	-	0	0	223143	0	0	769	0	0	0	0	0	C3-C5	64	1819	1023	94.33	183	11	324	751	314	746	428
KP_F016-OP_R070	Archaea	-	0	0	223143	0	0	769	0	0	0	0	0	C3-C5	64	1819	1023	94.85	184	10	323	750	314	745	427
KP_F016-OP_R073	Archaea	-	0	0	223143	0	0	769	0	0	0	0	0	C3-V5	62.7	1782	1060	89.69	174	20	324	844	314	838	520
KP_F018-KP_R005	Archaea	-	0	0	223143	0	0	769	0	0	0	0	0	C3-C5	81.49	2316	526	94.85	184	10	331	749	322	738	418
KP_F018-KP_R006	Archaea	-	0	0	223143	0	0	769	0	0	0	0	0	C3-C6	80.33	2283	559	92.78	180	14	330	874	322	863	543
KP_F018-KP_R007	Archaea	-	0	0	223143	0	0	769	0	0	0	0	0	C3-C6	80.3	2282	560	90.21	175	19	330	880	322	870	549
KP_F018-KP_R008	Archaea	-	0	0	223143	0	0	769	0	0	0	0	0	C3-C6	79.77	2267	575	88.66	172	22	330	875	322	866	545
KP_F018-KP_R010	Archaea	-	0	0	223143	0	0	769	0	0	0	0	0	C3-C6	58.23	1655	1187	81.96	159	35	328	924	323	921	595
KP_F018-KP_R031	Archaea	-	0	0	223143	0	0	769	0	0	0	0	0	C3-C5	81.81	2325	517	95.88	186	8	330	745	322	734	414
KP_F018-KP_R032	Archaea	-	0	0	223143	0	0	769	0	0	0	0	0	C3-C5	81.84	2326	516	95.88	186	8	330	745	322	734	414
KP_F018-KP_R035	Archaea	-	0	0	223143	0	0	769	0	0	0	0	0	C3-C5	81.77	2324	518	95.88	186	8	330	748	322	737	417
KP_F018-KP_R038	Archaea	-	0	0	223143	0	0	769	0	0	0	0	0	C3-C5	81.67	2321	521	94.85	184	10	331	749	322	738	418
KP_F018-KP_R072	Archaea	-	0	0	223143	0	0	769	0	0	0	0	0	C3-C6	80.51	2288	554	92.78	180	14	330	869	322	858	538
KP_F018-OP_R010	Archaea	-	0	0	223143	0	0	769	0	0	0	0	0	C3-C5	81.67	2321	521	94.85	184	10	331	749	322	738	418
KP_F018-OP_R012	Archaea	-	0	0	223143	0	0	769	0	0	0	0	0	C3-C6	80.72	2294	548	90.72	176	18	330	879	322	870	549
KP_F018-OP_R014	Archaea	-	0	0	223143	0	0	769	0	0	0	0	0	C3-C5	81.7	2322	520	94.85	184	10	331	749	322	738	418
KP_F018-OP_R020	Archaea	-	0	0	223143	0	0	769	0	0	0	0	0	C3-C5	81.77	2324	518	95.88	186	8	330	748	322	737	417
KP_F018-OP_R032	Archaea	-	0	0	223143	0	0	769	0	0	0	0	0	C3-C5	77.59	2205	637	86.6	168	26	329	742	322	734	413
KP_F018-OP_R036	Archaea	-	0	0	223143	0	0	769	0	0	0	0	0	C3-C5	81.7	2322	520	94.85	184	10	331	749	322	738	418
KP_F018-OP_R048	Archaea	-	0	0	223143	0	0	769	0	0	0	0	0	C3-C5	81.7	2322	520	94.85	184	10	331	749	322	738	418
KP_F018-OP_R070	Archaea	-	0	0	223143	0	0	769	0	0	0	0	0	C3-C5	81.77	2324	518	95.88	186	8	330	748	322	737	417
KP_F018-OP_R073	Archaea	-	0	0	223143	0	0	769	0	0	0	0	0	C3-V5	81.25	2309	533	90.72	176	18	331	841	322	830	510
KP_F019-KP_R006	Archaea	-	0	0	223143	0	0	769	0	0	0	0	0	V3-C6	70.83	2013	829	74.23	144	50	457	874	447	863	417
KP_F019-KP_R007	Archaea	-	0	0	223143	0	0	769	0	0	0	0	0	V3-C6	70.65	2008	834	72.16	140	54	455	879	447	870	424
KP_F019-KP_R008	Archaea	-	0	0	223143	0	0	769	0	0	0	0	0	V3-C6	70.16	1994	848	70.62	137	57	455	875	447	866	420
KP_F019-KP_R010	Archaea	-	0	0	223143	0	0	769	0	0	0	0	0	V3-C6	48.94	1391	1451	63.92	124	70	455	924	454	921	469
KP_F019-KP_R013	Archaea	-	0	0	223143	0	0	769	0	0	0	0	0	V3-C6	71.64	2036	806	74.23	144	50	457	1001	447	990	545
KP_F019-KP_R014	Archaea	-	0	0	223143	0	0	769	0	0	0	0	0	V3-C6	72.27	2054	788	75.26	146	48	457	1006	447	994	549
KP_F019-KP_R072	Archaea	-	0	0	223143	0	0	769	0	0	0	0	0	V3-C6	71.15	2022	820	74.74	145	49	457	869	447	858	412
KP_F019-OP_R012	Archaea	-	0	0	223143	0	0	769	0	0	0	0	0	V3-C6	71.08	2020	822	72.68	141	53	455	879	447	870	424
KP_F019-OP_R073	Archaea	-	0	0	223143	0	0	769	0	0	0	0	0	V3-V5	71.15	2022	820	72.16	140	54	457	841	447	830	384
KP_F020-KP_R006	Archaea	-	0	0	223143	0	0	769	0	0	0	0	0	V3-C6	82.23	2337	505	95.88	186	8	460	874	450	863	414
KP_F020-KP_R007	Archaea	-	0	0	223143	0	0	769	0	0	0	0	0	V3-C6	82.09	2333	509	93.3	181	13	458	879	450	870	421
KP_F020-KP_R008	Archaea	-	0	0	223143	0	0	769	0	0	0	0	0	V3-C6	81.56	2318	524	91.75	178	16	458	875	450	866	417
KP_F020-KP_R010	Archaea	-	0	0	223143	0	0	769	0	0	0	0	0	V3-C6	60.06	1707	1135	84.54	164	30	458	924	457	921	465
KP_F020-KP_R013	Archaea	-	0	0	223143	0	0	769	0	0	0	0	0	V3-C6	83.08	2361	481	95.88	186	8	460	1001	450	990	542
KP_F020-KP_R014	Archaea	V3-V6	6.96	15521	207622	23.54	181	588	508	1054	492	1037	546	V3-C6	82.2	2336	506	90.21	175	19	460	1006	450	994	546
KP_F020-KP_R015	Archaea	-	0	0	223143	0	0	769	0	0	0	0	0	V3-C7	63.05	1792	1050	86.08	167	27	463	1060	457	1049	597
KP_F020-KP_R072	Archaea	C4-C6	0.03	57	223086	3.38	26	743	515	912	512	906	397	V3-C6	82.55	2346	496	96.39	187	7	460	869	450	858	409
KP_F020-OP_R012	Archaea	-	0	0	223143	0	0	769	0	0	0	0	0	V3-C6	82.51	2345	497	93.81	182	12	458	879	450	870	421
KP_F022-KP_R016	Archaea	-	0	0	223143	0	0	769	0	0	0	0	0	C6-V9	45.6	1296	1546	87.63	170	24	864	1452	858	1444	588
KP_F022-KP_R060	Archaea	-	0	0	223143	0	0	769	0	0	0	0	0	V5-C9	80.79	2296	546	92.27	179	15	859	1355	850	1346	496
KP_F022-KP_R061	Archaea	-	0	0	223143	0	0	769	0	0	0	0	0	V5-C9	80.79	2296	546	92.27	179	15	859	1355	850	1346	496
KP_F022-KP_R062	Archaea	-	0	0	223143	0	0	769	0	0	0	0	0	V5-C9	80.79	2296	546	92.27	179	15	859	1355	850	1346	496
KP_F022-KP_R063	Archaea	-	0	0	223143	0	0	769	0	0	0	0	0	V5-V9	71.22	2024	818	91.75	178	16	860	1446	850	1436	585
KP_F022-KP_R064	Archaea	-	0	0	223143	0	0	769	0	0	0	0	0	V5-V9	62.98	1790	1052	88.66	172	22	861	1449	850	1439	588
KP_F022-KP_R065	Archaea	-	0	0	223143	0	0	769	0	0	0	0	0	C6-V9	43.21	1228	1614	87.11	169	25	864	1456	858	1447	591
KP_F022-KP_R066	Archaea	-	0	0	223143	0	0	769	0	0	0	0	0	V5-V9	67.17	1909	933	91.75	178	16	861	1447	850	1437	586
KP_F022-KP_R075	Archaea	-	0	0	223143	0	0	769	0	0	0	0	0	V5-C9	80.86	2298	544	92.27	179	15	859	1354	850	1345	495
KP_F022-KP_R076	Archaea	-	0	0	223143	0	0	769	0	0	0	0	0	V5-C9	80.86	2298	544	92.27	179	15	859	1354	850	1345	495
KP_F022-KP_R078	Archaea	-	0	0	223143	0	0	769	0	0	0	0	0	V5-C9	80.86	2298	544	92.27	179	15	859	1354	850	1345	495
KP_F022-KP_R079	Archaea	-	0	0	223143	0	0	769	0	0	0	0	0	C6-V9	42.75	1215	1627	86.6	168	26	865	1455	858	1446	590
KP_F022-OP_R004	Archaea	-	0	0	223143	0	0	769	0	0	0	0	0	V5-C9	79.98	2273	569	89.18	173	21	860	1347	850	1337	487
KP_F022-OP_R016	Archaea	-	0	0	223143	0	0	769	0	0	0	0	0	V5-C9	80.82	2297	545	92.78	180	14	859	1349	850	1340	490
KP_F022-OP_R076	Archaea	-	0	0	223143	0	0	769	0	0	0	0	0	V5-V9	65.62	1865	977	88.66	172	22	861	1448	850	1438	587
KP_F022-OP_R084	Archaea	-	0	0	223143	0	0	769	0	0	0	0	0	V5-V9	62.98	1790	1052	88.66	172	22	861	1449	850	1439	588
KP_F022-OP_R094	Archaea	-	0	0	223143	0	0	769	0	0	0	0	0	C6-V9	43.24	1229	1613	86.6	168	26	865	1454	858	1445	589
KP_F022-OP_R121	Archaea	-	0	0	223143	0	0	769	0	0	0	0	0	V5-C9	80.86	2298	544	92.27	179	15	859	1354	850	1345	495
KP_F022-OP_R123	Archaea	-	0	0	223143	0	0	769	0	0	0	0	0	C6-V9	43.21	1228	1614	87.11	169	25	864	1456	858	1447	591
KP_F023-KP_R016	Archaea	-	0	0	223143	0	0	769	0	0	0	0	0	C6-V9	45.53	1294	1548	87.63	170	24	864	1452	858	1444	588
KP_F023-KP_R060	Archaea	-	0	0	223143	0	0	769	0	0	0	0	0	V5-C9	80.72	2294	548	92.27	179	15	859	1355	850	1346	496
KP_F023-KP_R061	Archaea	-	0	0	223143	0	0	769	0	0	0	0	0	V5-C9	80.72	2294	548	92.27	179	15	859	1355	850	1346	496
KP_F023-KP_R062	Archaea	-	0	0	223143	0	0	769	0	0	0	0	0	V5-C9	80.72	2294	548	92.27	179	15	859	1355	850	1346	496
KP_F023-KP_R063	Archaea	-	0	0	223143	0	0	769	0	0	0	0	0	V5-V9	71.15	2022	820	91.75	178	16	860	1446	850	1436	585
KP_F023-KP_R064	Archaea	-	0	0	223143	0	0	769	0	0	0	0	0	V5-V9	62.91	1788	1054	88.66	172	22	861	1449	850	1439	588
KP_F023-KP_R065	Archaea	-	0	0	223143	0	0	769	0	0	0	0	0	C6-V9	43.14	1226	1616	87.11	169	25	864	1456	858	1447	591
KP_F023-KP_R066	Archaea	-	0	0	223143	0	0	769	0	0	0	0	0	V5-V9	67.1	1907	935	91.75	178	16	861	1447	850	1437	586
KP_F023-KP_R075	Archaea	-	0	0	223143	0	0	769	0	0	0	0	0	V5-C9	80.79	2296	546	92.27	179	15	859	1354	850	1345	495
KP_F023-KP_R076	Archaea	-	0	0	223143	0	0	769	0	0	0	0	0	V5-C9	80.79	2296	546	92.27	179	15	859	1354	850	1345	495
KP_F023-KP_R078	Archaea	-	0	0	223143	0	0	769	0	0	0	0	0	V5-C9	80.79	2296	546	92.27	179	15	859	1354	850	1345	495
KP_F023-KP_R079	Archaea	-	0	0	223143	0	0	769	0	0	0	0	0	C6-V9	42.68	1213	1629	86.6	168	26	865	1455	858	1446	590
KP_F023-OP_R004	Archaea	-	0	0	223143	0	0	769	0	0	0	0	0	V5-C9	79.91	2271	571	89.18	173	21	860	1347	850	1337	487
KP_F023-OP_R016	Archaea	-	0	0	223143	0	0	769	0	0	0	0	0	V5-C9	80.75	2295	547	92.78	180	14	859	1349	850	1340	490
KP_F023-OP_R076	Archaea	-	0	0	223143	0	0	769	0	0	0	0	0	V5-V9	65.55	1863	979	88.66	172	22	861	1448	850	1438	587
KP_F023-OP_R084	Archaea	-	0	0	223143	0	0	769	0	0	0	0	0	V5-V9	62.91	1788	1054	88.66	172	22	861	1449	850	1439	588
KP_F023-OP_R094	Archaea	-	0	0	223143	0	0	769	0	0	0	0	0	C6-V9	43.17	1227	1615	86.6	168	26	865	1454	858	1445	589
KP_F023-OP_R121	Archaea	-	0	0	223143	0	0	769	0	0	0	0	0	V5-C9	80.79	2296	546	92.27	179	15	859	1354	850	1345	495
KP_F023-OP_R123	Archaea	-	0	0	223143	0	0	769	0	0	0	0	0	C6-V9	43.14	1226	1616	87.11	169	25	864	1456	858	1447	591
KP_F025-KP_R016	Archaea	-	0	0	223143	0	0	769	0	0	0	0	0	C6-V9	40.85	1161	1681	79.9	155	39	908	1454	902	1444	546
KP_F025-KP_R060	Archaea	-	0	0	223143	0	0	769	0	0	0	0	0	C6-C9	59.36	1687	1155	81.96	159	35	905	1359	902	1356	454
KP_F025-KP_R061	Archaea	-	0	0	223143	0	0	769	0	0	0	0	0	C6-C9	59.36	1687	1155	81.96	159	35	905	1359	902	1356	454
KP_F025-KP_R062	Archaea	-	0	0	223143	0	0	769	0	0	0	0	0	C6-C9	59.36	1687	1155	81.96	159	35	905	1359	902	1356	454
KP_F025-KP_R063	Archaea	-	0	0	223143	0	0	769	0	0	0	0	0	C6-V9	52.18	1483	1359	81.96	159	35	906	1450	902	1440	543
KP_F025-KP_R064	Archaea	-	0	0	223143	0	0	769	0	0	0	0	0	C6-V9	47.15	1340	1502	80.41	156	38	907	1453	902	1444	546
KP_F025-KP_R065	Archaea	-	0	0	223143	0	0	769	0	0	0	0	0	C6-V9	37.83	1075	1767	78.87	153	41	908	1458	902	1447	550
KP_F025-KP_R066	Archaea	-	0	0	223143	0	0	769	0	0	0	0	0	C6-V9	49.12	1396	1446	81.96	159	35	907	1451	902	1441	544
KP_F025-KP_R075	Archaea	-	0	0	223143	0	0	769	0	0	0	0	0	C6-C9	59.32	1686	1156	81.96	159	35	905	1357	902	1355	453
KP_F025-KP_R076	Archaea	-	0	0	223143	0	0	769	0	0	0	0	0	C6-C9	59.32	1686	1156	81.96	159	35	905	1357	902	1355	453
KP_F025-KP_R078	Archaea	-	0	0	223143	0	0	769	0	0	0	0	0	C6-C9	59.36	1687	1155	81.96	159	35	905	1358	902	1355	453
KP_F025-KP_R079	Archaea	-	0	0	223143	0	0	769	0	0	0	0	0	C6-V9	38.88	1105	1737	78.87	153	41	908	1457	902	1446	548
KP_F025-OP_R004	Archaea	-	0	0	223143	0	0	769	0	0	0	0	0	C6-C9	57.64	1638	1204	76.8	149	45	902	1345	902	1347	443
KP_F025-OP_R016	Archaea	-	0	0	223143	0	0	769	0	0	0	0	0	C6-C9	58.41	1660	1182	77.84	151	43	901	1347	902	1350	446
KP_F025-OP_R076	Archaea	-	0	0	223143	0	0	769	0	0	0	0	0	C6-V9	47.82	1359	1483	81.44	158	36	907	1452	902	1443	545
KP_F025-OP_R084	Archaea	-	0	0	223143	0	0	769	0	0	0	0	0	C6-V9	47.15	1340	1502	80.41	156	38	907	1453	902	1444	546
KP_F025-OP_R094	Archaea	-	0	0	223143	0	0	769	0	0	0	0	0	C6-V9	39.23	1115	1727	78.87	153	41	908	1456	902	1445	547
KP_F025-OP_R121	Archaea	-	0	0	223143	0	0	769	0	0	0	0	0	C6-C9	59.36	1687	1155	81.96	159	35	905	1358	902	1355	453
KP_F025-OP_R123	Archaea	-	0	0	223143	0	0	769	0	0	0	0	0	C6-V9	37.83	1075	1767	78.87	153	41	908	1458	902	1447	550
KP_F026-KP_R016	Archaea	-	0	0	223143	0	0	769	0	0	0	0	0	C6-V9	40.85	1161	1681	79.9	155	39	908	1454	902	1444	546
KP_F026-KP_R060	Archaea	-	0	0	223143	0	0	769	0	0	0	0	0	C6-C9	59.36	1687	1155	81.96	159	35	905	1359	902	1356	454
KP_F026-KP_R061	Archaea	-	0	0	223143	0	0	769	0	0	0	0	0	C6-C9	59.36	1687	1155	81.96	159	35	905	1359	902	1356	454
KP_F026-KP_R062	Archaea	-	0	0	223143	0	0	769	0	0	0	0	0	C6-C9	59.36	1687	1155	81.96	159	35	905	1359	902	1356	454
KP_F026-KP_R063	Archaea	-	0	0	223143	0	0	769	0	0	0	0	0	C6-V9	52.18	1483	1359	81.96	159	35	906	1450	902	1440	543
KP_F026-KP_R064	Archaea	-	0	0	223143	0	0	769	0	0	0	0	0	C6-V9	47.15	1340	1502	80.41	156	38	907	1453	902	1444	546
KP_F026-KP_R065	Archaea	-	0	0	223143	0	0	769	0	0	0	0	0	C6-V9	37.83	1075	1767	78.87	153	41	908	1458	902	1447	550
KP_F026-KP_R066	Archaea	-	0	0	223143	0	0	769	0	0	0	0	0	C6-V9	49.12	1396	1446	81.96	159	35	907	1451	902	1441	544
KP_F026-KP_R075	Archaea	-	0	0	223143	0	0	769	0	0	0	0	0	C6-C9	59.32	1686	1156	81.96	159	35	905	1357	902	1355	453
KP_F026-KP_R076	Archaea	-	0	0	223143	0	0	769	0	0	0	0	0	C6-C9	59.32	1686	1156	81.96	159	35	905	1357	902	1355	453
KP_F026-KP_R078	Archaea	-	0	0	223143	0	0	769	0	0	0	0	0	C6-C9	59.36	1687	1155	81.96	159	35	905	1358	902	1355	453
KP_F026-KP_R079	Archaea	-	0	0	223143	0	0	769	0	0	0	0	0	C6-V9	38.88	1105	1737	78.87	153	41	908	1457	902	1446	548
KP_F026-OP_R004	Archaea	-	0	0	223143	0	0	769	0	0	0	0	0	C6-C9	57.64	1638	1204	76.8	149	45	902	1345	902	1347	443
KP_F026-OP_R016	Archaea	-	0	0	223143	0	0	769	0	0	0	0	0	C6-C9	58.41	1660	1182	77.84	151	43	901	1347	902	1350	446
KP_F026-OP_R076	Archaea	-	0	0	223143	0	0	769	0	0	0	0	0	C6-V9	47.82	1359	1483	81.44	158	36	907	1452	902	1443	545
KP_F026-OP_R084	Archaea	-	0	0	223143	0	0	769	0	0	0	0	0	C6-V9	47.15	1340	1502	80.41	156	38	907	1453	902	1444	546
KP_F026-OP_R094	Archaea	-	0	0	223143	0	0	769	0	0	0	0	0	C6-V9	39.23	1115	1727	78.87	153	41	908	1456	902	1445	547
KP_F026-OP_R121	Archaea	-	0	0	223143	0	0	769	0	0	0	0	0	C6-C9	59.36	1687	1155	81.96	159	35	905	1358	902	1355	453
KP_F026-OP_R123	Archaea	-	0	0	223143	0	0	769	0	0	0	0	0	C6-V9	37.83	1075	1767	78.87	153	41	908	1458	902	1447	550
KP_F059-KP_R015	Archaea	-	0	0	223143	0	0	769	0	0	0	0	0	C5-C7	62.77	1784	1058	86.08	167	27	731	1061	724	1049	330
KP_F082-KP_R015	Archaea	-	0	0	223143	0	0	769	0	0	0	0	0	C5-C7	58.27	1656	1186	76.29	148	46	730	1056	728	1049	326
KP_F082-KP_R074	Archaea	C5-V7	3.12	6960	216183	26.27	202	567	803	1130	808	1135	327	C5-C7	59.36	1687	1155	78.35	152	42	730	1056	728	1049	326
KP_F083-KP_R016	Archaea	-	0	0	223143	0	0	769	0	0	0	0	0	V5-V9	45.43	1291	1551	89.69	174	20	859	1458	849	1444	599
KP_F083-KP_R060	Archaea	C6-C9	0.01	32	223111	1.69	13	756	892	1391	889	1386	499	V5-C9	81.21	2308	534	95.36	185	9	853	1359	841	1346	507
KP_F083-KP_R061	Archaea	C6-C9	0.01	32	223111	1.69	13	756	892	1391	889	1386	499	V5-C9	81.21	2308	534	95.36	185	9	853	1359	841	1346	507
KP_F083-KP_R062	Archaea	C6-C9	0.01	32	223111	1.69	13	756	892	1391	889	1386	499	V5-C9	81.21	2308	534	95.36	185	9	853	1359	841	1346	507
KP_F083-KP_R063	Archaea	C6-C10	0.01	15	223128	0.52	4	765	888	1484	889	1484	596	V5-V9	71.18	2023	819	93.81	182	12	853	1449	841	1436	596
KP_F083-KP_R064	Archaea	C6-C10	0	1	223142	0.13	1	768	886	1486	886	1486	600	V5-V9	62.88	1787	1055	90.72	176	18	855	1453	841	1439	599
KP_F083-KP_R066	Archaea	C6-C10	0	11	223132	0.52	4	765	888	1485	889	1485	597	V5-V9	67.14	1908	934	93.81	182	12	854	1451	841	1437	597
KP_F083-KP_R075	Archaea	C6-C9	0.01	32	223111	1.69	13	756	892	1390	889	1385	498	V5-C9	81.25	2309	533	95.36	185	9	853	1358	841	1345	505
KP_F083-KP_R076	Archaea	C6-C9	0.01	32	223111	1.69	13	756	892	1390	889	1385	498	V5-C9	81.25	2309	533	95.36	185	9	853	1358	841	1345	505
KP_F083-KP_R078	Archaea	C6-C9	0.01	32	223111	1.69	13	756	892	1390	889	1385	498	V5-C9	81.28	2310	532	95.36	185	9	853	1358	841	1345	506
KP_F083-OP_R004	Archaea	-	0	0	223143	0	0	769	0	0	0	0	0	V5-C9	79.28	2253	589	87.11	169	25	850	1346	841	1337	496
KP_F083-OP_R016	Archaea	-	0	0	223143	0	0	769	0	0	0	0	0	V5-C9	80.3	2282	560	91.24	177	17	850	1349	841	1340	499
KP_F083-OP_R076	Archaea	C6-C10	0	1	223142	0.13	1	768	886	1485	886	1485	599	V5-V9	65.52	1862	980	90.72	176	18	854	1452	841	1438	598
KP_F083-OP_R084	Archaea	C6-C10	0	1	223142	0.13	1	768	886	1486	886	1486	600	V5-V9	62.88	1787	1055	90.72	176	18	855	1453	841	1439	599
KP_F083-OP_R094	Archaea	-	0	0	223143	0	0	769	0	0	0	0	0	V5-V9	43.07	1224	1618	88.66	172	22	859	1459	849	1445	600
KP_F083-OP_R121	Archaea	C6-C9	0.01	32	223111	1.69	13	756	892	1390	889	1385	498	V5-C9	81.28	2310	532	95.36	185	9	853	1358	841	1345	506
KP_F085-KP_R016	Archaea	C7-C10	2.74	6124	217019	60.47	465	304	1099	1510	1107	1517	410	V6-V9	44.69	1270	1572	85.57	166	28	1050	1460	1034	1444	409
KP_F085-KP_R064	Archaea	C7-C10	4.55	10163	212980	73.73	567	202	1099	1509	1095	1506	410	V6-V9	50.95	1448	1394	86.08	167	27	1049	1458	1034	1444	409
KP_F085-KP_R065	Archaea	C7-C10	2.75	6132	217011	59.43	457	312	1100	1513	1110	1520	413	V6-V9	41.34	1175	1667	85.57	166	28	1051	1464	1034	1447	413
KP_F085-KP_R079	Archaea	C7-C10	2.41	5380	217763	59.69	459	310	1100	1512	1110	1519	412	V6-V9	42.12	1197	1645	85.57	166	28	1051	1462	1034	1446	411
KP_F085-OP_R004	Archaea	-	0	0	223143	0	0	769	0	0	0	0	0	V6-C9	61.89	1759	1083	80.93	157	37	1042	1349	1034	1341	307
KP_F085-OP_R016	Archaea	-	0	0	223143	0	0	769	0	0	0	0	0	V6-C9	62.63	1780	1062	81.44	158	36	1041	1351	1034	1344	310
KP_F085-OP_R076	Archaea	C7-C10	4.64	10358	212785	74.12	570	199	1099	1508	1095	1505	409	V6-V9	51.55	1465	1377	86.08	167	27	1049	1457	1034	1443	408
KP_F085-OP_R084	Archaea	C7-C10	4.55	10149	212994	73.73	567	202	1099	1509	1095	1506	410	V6-V9	50.95	1448	1394	86.08	167	27	1049	1458	1034	1444	409
KP_F085-OP_R094	Archaea	C7-C10	2.56	5703	217440	59.95	461	308	1100	1511	1107	1518	411	V6-V9	42.61	1211	1631	85.57	166	28	1051	1461	1034	1445	410
KP_F085-OP_R123	Archaea	C7-C10	2.76	6159	216984	59.43	457	312	1099	1513	1110	1520	413	V6-V9	41.34	1175	1667	85.57	166	28	1051	1464	1034	1447	413
OP_F009-KP_R015	Archaea	-	0	0	223143	0	0	769	0	0	0	0	0	C5-C7	58.48	1662	1180	76.8	149	45	726	1056	724	1049	330
OP_F014-KP_R006	Archaea	-	0	0	223143	0	0	769	0	0	0	0	0	V3-C6	74.28	2111	731	85.05	165	29	455	873	446	863	418
OP_F014-KP_R007	Archaea	-	0	0	223143	0	0	769	0	0	0	0	0	V3-C6	74.1	2106	736	82.99	161	33	453	879	446	870	425
OP_F014-KP_R008	Archaea	-	0	0	223143	0	0	769	0	0	0	0	0	V3-C6	73.61	2092	750	81.44	158	36	453	875	446	866	421
OP_F014-KP_R010	Archaea	-	0	0	223143	0	0	769	0	0	0	0	0	V3-C6	52.25	1485	1357	74.23	144	50	454	923	453	921	469
OP_F014-KP_R013	Archaea	-	0	0	223143	0	0	769	0	0	0	0	0	V3-C6	75.09	2134	708	85.05	165	29	455	1001	446	990	546
OP_F014-KP_R014	Archaea	V3-V6	6.93	15462	207681	23.54	181	588	504	1054	488	1037	550	V3-C6	74.21	2109	733	79.9	155	39	456	1005	446	994	550
OP_F014-KP_R072	Archaea	C4-C6	0.03	57	223086	3.38	26	743	511	912	508	906	401	V3-C6	74.6	2120	722	85.57	166	28	455	868	446	858	413
OP_F014-OP_R012	Archaea	-	0	0	223143	0	0	769	0	0	0	0	0	V3-C6	74.52	2118	724	83.51	162	32	453	879	446	870	425
OP_F043-KP_R005	Archaea	C3-C5	3.1	6917	216226	26.01	200	569	358	821	360	826	463	C3-C5	77.3	2197	645	80.93	157	37	318	745	314	738	427
OP_F043-KP_R006	Archaea	-	0	0	223143	0	0	769	0	0	0	0	0	C3-C6	76.64	2178	664	80.93	157	37	318	870	314	863	552
OP_F043-KP_R007	Archaea	-	0	0	223143	0	0	769	0	0	0	0	0	C3-C6	76.07	2162	680	76.8	149	45	318	875	314	870	557
OP_F043-KP_R008	Archaea	-	0	0	223143	0	0	769	0	0	0	0	0	C3-C6	75.97	2159	683	76.8	149	45	318	871	314	866	553
OP_F043-KP_R072	Archaea	C3-C6	0.03	58	223085	3.25	25	744	339	913	334	906	574	C3-C6	76.95	2187	655	81.44	158	36	318	865	314	858	547
OP_F043-OP_R012	Archaea	-	0	0	223143	0	0	769	0	0	0	0	0	C3-C6	76.5	2174	668	77.32	150	44	318	875	314	870	557
OP_F066-KP_R015	Archaea	-	0	0	223143	0	0	769	0	0	0	0	0	C5-C7	63.02	1791	1051	86.08	167	27	731	1061	724	1049	330
OP_F100-KP_R006	Archaea	-	0	0	223143	0	0	769	0	0	0	0	0	V3-C6	74.52	2118	724	85.05	165	29	455	873	446	863	418
OP_F100-KP_R007	Archaea	-	0	0	223143	0	0	769	0	0	0	0	0	V3-C6	74.35	2113	729	82.99	161	33	453	879	446	870	425
OP_F100-KP_R008	Archaea	-	0	0	223143	0	0	769	0	0	0	0	0	V3-C6	73.86	2099	743	81.44	158	36	453	875	446	866	421
OP_F100-KP_R010	Archaea	-	0	0	223143	0	0	769	0	0	0	0	0	V3-C6	52.5	1492	1350	74.23	144	50	454	923	453	921	469
OP_F100-KP_R013	Archaea	-	0	0	223143	0	0	769	0	0	0	0	0	V3-C6	75.33	2141	701	85.05	165	29	455	1001	446	990	546
OP_F100-KP_R014	Archaea	V3-V6	6.94	15481	207662	23.54	181	588	504	1054	488	1037	550	V3-C6	74.45	2116	726	79.9	155	39	456	1005	446	994	550
OP_F100-KP_R072	Archaea	C4-C6	0.03	57	223086	3.38	26	743	511	912	508	906	401	V3-C6	74.84	2127	715	85.57	166	28	455	868	446	858	413
OP_F100-OP_R012	Archaea	-	0	0	223143	0	0	769	0	0	0	0	0	V3-C6	74.77	2125	717	83.51	162	32	453	879	446	870	425
OP_F114-KP_R005	Archaea	C3-C5	3.1	6917	216226	26.01	200	569	358	821	360	826	463	C3-C5	83.25	2366	476	97.42	189	5	322	749	314	738	426
OP_F114-KP_R006	Archaea	-	0	0	223143	0	0	769	0	0	0	0	0	C3-C6	81.98	2330	512	95.36	185	9	322	874	314	863	551
OP_F114-KP_R007	Archaea	-	0	0	223143	0	0	769	0	0	0	0	0	C3-C6	81.84	2326	516	92.78	180	14	322	879	314	870	557
OP_F114-KP_R008	Archaea	-	0	0	223143	0	0	769	0	0	0	0	0	C3-C6	81.32	2311	531	91.24	177	17	322	875	314	866	553
OP_F114-KP_R072	Archaea	C3-C6	0.03	58	223085	3.25	25	744	339	913	334	906	574	C3-C6	82.3	2339	503	95.88	186	8	322	869	314	858	546
OP_F114-OP_R012	Archaea	-	0	0	223143	0	0	769	0	0	0	0	0	C3-C6	82.27	2338	504	93.3	181	13	322	879	314	870	557
KP_F020-KP_R074	Universal	C4-V7	93.78	209270	13873	95.45	734	35	517	1113	526	1125	596	V3-C7	64.14	1823	1019	88.14	171	23	463	1060	457	1049	597
KP_F020-OP_R073	Universal	C4-C6	92.87	207226	15917	95.71	736	33	517	893	526	903	376	V3-V5	82.44	2343	499	92.78	180	14	460	841	450	830	381
KP_F059-KP_R074	Universal	C5-V7	97.03	216526	6617	98.44	757	12	782	1112	792	1125	331	C5-C7	63.86	1815	1027	88.14	171	23	731	1061	724	1049	330
KP_F085-KP_R060	Universal	C7-C9	33.32	74341	148802	94.28	725	44	1101	1408	1098	1414	308	V6-C9	63.48	1804	1038	85.57	166	28	1045	1363	1034	1350	318
KP_F085-KP_R061	Universal	C7-C9	32.57	72687	150456	93.63	720	49	1101	1408	1098	1414	308	V6-C9	63.48	1804	1038	85.57	166	28	1045	1363	1034	1350	318
KP_F085-KP_R062	Universal	C7-C9	32.62	72787	150356	93.63	720	49	1101	1408	1098	1414	308	V6-C9	63.48	1804	1038	85.57	166	28	1045	1363	1034	1350	318
KP_F085-KP_R063	Universal	C7-C10	5.21	11622	211521	78.8	606	163	1098	1506	1095	1503	407	V6-V9	56.4	1603	1239	86.08	167	27	1047	1454	1034	1441	407
KP_F085-KP_R066	Universal	C7-C10	4.96	11058	212085	77.76	598	171	1098	1507	1095	1504	408	V6-V9	52.64	1496	1346	86.08	167	27	1048	1456	1034	1441	408
KP_F085-KP_R075	Universal	C7-C9	32.48	72474	150669	93.63	720	49	1101	1407	1098	1413	307	V6-C9	63.44	1803	1039	85.57	166	28	1045	1361	1034	1349	316
KP_F085-KP_R076	Universal	C7-C9	33.23	74141	149002	94.28	725	44	1101	1407	1098	1413	307	V6-C9	63.44	1803	1039	85.57	166	28	1045	1361	1034	1349	316
KP_F085-KP_R078	Universal	C7-C9	32.78	73141	150002	93.63	720	49	1101	1407	1098	1413	307	V6-C9	63.48	1804	1038	85.57	166	28	1045	1362	1034	1349	317
KP_F085-OP_R121	Universal	C7-C9	33.53	74828	148315	94.28	725	44	1101	1407	1098	1413	307	V6-C9	63.48	1804	1038	85.57	166	28	1045	1362	1034	1349	317
OP_F009-KP_R074	Universal	C5-V7	93.66	208995	14148	96.49	742	27	783	1113	792	1125	331	C5-C7	59.57	1693	1149	78.87	153	41	726	1056	724	1049	330
OP_F014-KP_R074	Universal	C4-V7	93.46	208559	14584	95.45	734	35	513	1113	522	1125	600	V3-C7	56.23	1598	1244	77.84	151	43	459	1060	453	1049	602
OP_F014-OP_R073	Universal	C4-C6	92.55	206514	16629	95.71	736	33	513	893	522	903	380	V3-V5	74.56	2119	723	82.47	160	34	455	841	446	830	385
OP_F043-KP_R031	Universal	C3-C5	96.93	216304	6839	95.71	736	33	343	800	335	810	457	C3-C5	77.62	2206	636	81.96	159	35	318	741	314	734	423
OP_F043-KP_R032	Universal	C3-C5	93.84	209408	13735	94.28	725	44	343	801	348	810	457	C3-C5	77.66	2207	635	81.96	159	35	318	741	314	734	423
OP_F043-KP_R035	Universal	C3-C5	93.58	208817	14326	94.15	724	45	343	804	348	813	460	C3-C5	77.59	2205	637	81.96	159	35	318	744	314	737	426
OP_F043-KP_R038	Universal	C3-C5	93.33	208263	14880	93.89	722	47	343	805	348	814	461	C3-C5	77.48	2202	640	80.93	157	37	318	745	314	738	427
OP_F043-OP_R010	Universal	C3-C5	93.33	208268	14875	93.89	722	47	343	805	348	814	461	C3-C5	77.48	2202	640	80.93	157	37	318	745	314	738	427
OP_F043-OP_R014	Universal	C3-C5	93.34	208272	14871	93.89	722	47	343	805	348	814	461	C3-C5	77.52	2203	639	80.93	157	37	318	745	314	738	427
OP_F043-OP_R020	Universal	C3-C5	93.68	209032	14111	94.15	724	45	343	804	348	813	460	C3-C5	77.59	2205	637	81.96	159	35	318	744	314	737	426
OP_F043-OP_R032	Universal	C3-C5	93.83	209368	13775	93.89	722	47	343	801	348	810	457	C3-C5	77.02	2189	653	78.35	152	42	318	739	314	734	421
OP_F043-OP_R036	Universal	C3-C5	93.42	208469	14674	94.02	723	46	343	805	348	814	461	C3-C5	77.52	2203	639	80.93	157	37	318	745	314	738	427
OP_F043-OP_R048	Universal	C3-C5	93.24	208061	15082	93.89	722	47	343	805	348	814	461	C3-C5	77.52	2203	639	80.93	157	37	318	745	314	738	427
OP_F043-OP_R070	Universal	C3-C5	96.66	215700	7443	95.58	735	34	343	803	335	813	460	C3-C5	77.59	2205	637	81.96	159	35	318	744	314	737	426
OP_F043-OP_R073	Universal	C3-C6	96.28	214833	8310	94.8	729	40	343	892	335	903	549	C3-V5	76.21	2166	676	75.77	147	47	318	837	314	830	519
OP_F066-KP_R074	Universal	C5-V7	97.53	217638	5505	98.57	758	11	782	1112	792	1125	331	C5-C7	64.14	1823	1019	88.14	171	23	731	1061	724	1049	330
OP_F100-KP_R074	Universal	C4-V7	93.56	208781	14362	95.45	734	35	513	1113	522	1125	600	V3-C7	56.47	1605	1237	77.84	151	43	459	1060	453	1049	602
OP_F100-OP_R073	Universal	C4-C6	92.65	206734	16409	95.71	736	33	513	893	522	903	380	V3-V5	74.81	2126	716	82.47	160	34	455	841	446	830	385
OP_F114-KP_R031	Universal	C3-C5	96.94	216306	6837	95.71	736	33	343	800	335	810	457	C3-C5	83.57	2375	467	98.45	191	3	322	745	314	734	422
OP_F114-KP_R032	Universal	C3-C5	93.85	209410	13733	94.28	725	44	343	801	348	810	457	C3-C5	83.67	2378	464	98.97	192	2	322	745	314	734	422
OP_F114-KP_R035	Universal	C3-C5	93.58	208819	14324	94.15	724	45	343	804	348	813	460	C3-C5	83.53	2374	468	98.45	191	3	322	748	314	737	425
OP_F114-KP_R038	Universal	C3-C5	93.33	208265	14878	93.89	722	47	343	805	348	814	461	C3-C5	83.43	2371	471	97.42	189	5	322	749	314	738	426
OP_F114-OP_R010	Universal	C3-C5	93.33	208270	14873	93.89	722	47	343	805	348	814	461	C3-C5	83.43	2371	471	97.42	189	5	322	749	314	738	426
OP_F114-OP_R014	Universal	C3-C5	93.34	208274	14869	93.89	722	47	343	805	348	814	461	C3-C5	83.53	2374	468	97.94	190	4	322	749	314	738	426
OP_F114-OP_R020	Universal	C3-C5	93.68	209034	14109	94.15	724	45	343	804	348	813	460	C3-C5	83.53	2374	468	98.45	191	3	322	748	314	737	425
OP_F114-OP_R032	Universal	C3-C5	93.83	209370	13773	93.89	722	47	343	801	348	810	457	C3-C5	79.38	2256	586	89.18	173	21	321	742	314	734	421
OP_F114-OP_R036	Universal	C3-C5	93.42	208471	14672	94.02	723	46	343	805	348	814	461	C3-C5	83.53	2374	468	97.94	190	4	322	749	314	738	426
OP_F114-OP_R048	Universal	C3-C5	93.24	208063	15080	93.89	722	47	343	805	348	814	461	C3-C5	83.53	2374	468	97.94	190	4	322	749	314	738	426
OP_F114-OP_R070	Universal	C3-C5	96.66	215702	7441	95.58	735	34	343	803	335	813	460	C3-C5	83.53	2374	468	98.45	191	3	322	748	314	737	425
OP_F114-OP_R073	Universal	C3-C6	96.28	214835	8308	94.8	729	40	343	892	335	903	549	C3-V5	82.3	2339	503	93.3	181	13	323	841	314	830	518

## Sheet: >600bp
		BACTERIA												ARCHAEA
			VARIANT LEVEL			SPECIES LEVEL									VARIANT LEVEL			SPECIES LEVEL
PP_identifier	PP_type	16S_gene_region	Coverage (%)	Covered	Non_covered	Coverage (%)	Covered	Non_covered	PP_Mean_IP	PP_Mean_EP	PP_Mode_IP	PP_Mode_EP	PP_Mean_length	16S_gene_region	Coverage (%)	Covered	Non_covered	Coverage (%)	Covered	Non_covered	PP_Mean_IP	PP_Mean_EP	PP_Mode_IP	PP_Mode_EP	PP_Mean_length
KP_F020-KP_R077	Bacteria	C4-C9	28	62480	160663	89.47	688	81	520	1409	519	1414	889	V3-C9	0.14	4	2838	1.03	2	192	449	1344	459	1356	895
KP_F020-OP_R029	Bacteria	C4-C8	90.71	202409	20734	88.69	682	87	517	1193	526	1204	676	-	0	0	2842	0	0	194	0	0	0	0	0
KP_F020-OP_R055	Bacteria	C4-C9	81.65	182205	40938	72.3	556	213	518	1387	526	1397	869	-	0	0	2842	0	0	194	0	0	0	0	0
KP_F020-OP_R101	Bacteria	C4-C9	81.92	182806	40337	72.56	558	211	518	1386	526	1393	868	-	0	0	2842	0	0	194	0	0	0	0	0
KP_F032-KP_R029	Bacteria	C1-C5	12.84	28644	194499	67.23	517	252	8	808	8	807	800	-	0	0	2842	0	0	194	0	0	0	0	0
KP_F032-KP_R030	Bacteria	C1-C5	12.98	28955	194188	68.27	525	244	8	800	8	799	792	-	0	0	2842	0	0	194	0	0	0	0	0
KP_F032-KP_R031	Bacteria	C1-C5	13.23	29517	193626	75.29	579	190	8	804	8	803	796	-	0	0	2842	0	0	194	0	0	0	0	0
KP_F032-KP_R032	Bacteria	C1-C5	13.16	29365	193778	74.12	570	199	8	804	8	803	796	-	0	0	2842	0	0	194	0	0	0	0	0
KP_F032-KP_R033	Bacteria	C1-C5	12.9	28785	194358	67.23	517	252	8	805	8	804	797	-	0	0	2842	0	0	194	0	0	0	0	0
KP_F032-KP_R034	Bacteria	C1-C5	13.05	29115	194028	71.91	553	216	8	805	8	804	797	-	0	0	2842	0	0	194	0	0	0	0	0
KP_F032-KP_R035	Bacteria	C1-C5	13.13	29306	193837	73.99	569	200	8	807	8	806	799	-	0	0	2842	0	0	194	0	0	0	0	0
KP_F032-KP_R036	Bacteria	C1-C5	12.88	28750	194393	67.23	517	252	8	807	8	806	799	-	0	0	2842	0	0	194	0	0	0	0	0
KP_F032-KP_R037	Bacteria	C1-C5	12.87	28729	194414	67.23	517	252	8	808	8	807	800	-	0	0	2842	0	0	194	0	0	0	0	0
KP_F032-KP_R038	Bacteria	C1-C5	13.13	29301	193842	73.86	568	201	8	808	8	807	800	-	0	0	2842	0	0	194	0	0	0	0	0
KP_F032-KP_R039	Bacteria	C1-C6	8.71	19441	203702	64.89	499	270	8	931	8	935	923	-	0	0	2842	0	0	194	0	0	0	0	0
KP_F032-KP_R040	Bacteria	C1-C6	12.87	28725	194418	69.83	537	232	8	929	8	927	921	-	0	0	2842	0	0	194	0	0	0	0	0
KP_F032-KP_R041	Bacteria	C1-C6	12.88	28748	194395	69.83	537	232	8	928	8	926	920	-	0	0	2842	0	0	194	0	0	0	0	0
KP_F032-KP_R046	Bacteria	C1-C7	12.68	28305	194838	69.05	531	238	8	1066	8	1065	1058	-	0	0	2842	0	0	194	0	0	0	0	0
KP_F032-KP_R050	Bacteria	C1-C7	12.97	28936	194207	72.3	556	213	8	1067	8	1065	1059	-	0	0	2842	0	0	194	0	0	0	0	0
KP_F032-KP_R053	Bacteria	C1-C7	13.23	29528	193615	73.34	564	205	8	1079	8	1078	1072	-	0	0	2842	0	0	194	0	0	0	0	0
KP_F032-KP_R054	Bacteria	C1-C7	10.45	23310	199833	69.7	536	233	8	1082	8	1087	1074	-	0	0	2842	0	0	194	0	0	0	0	0
KP_F032-KP_R055	Bacteria	C1-C7	10.44	23287	199856	69.7	536	233	8	1083	8	1088	1075	-	0	0	2842	0	0	194	0	0	0	0	0
KP_F032-KP_R056	Bacteria	C1-C7	12.89	28766	194377	62.42	480	289	8	1117	8	1115	1109	-	0	0	2842	0	0	194	0	0	0	0	0
KP_F032-KP_R057	Bacteria	C1-C7	12.01	26790	196353	63.07	485	284	8	1117	8	1115	1109	-	0	0	2842	0	0	194	0	0	0	0	0
KP_F032-KP_R060	Bacteria	C1-C9	9.05	20194	202949	74.77	575	194	8	1409	8	1414	1401	-	0	0	2842	0	0	194	0	0	0	0	0
KP_F032-KP_R061	Bacteria	C1-C9	8.66	19334	203809	74.25	571	198	8	1408	8	1414	1401	-	0	0	2842	0	0	194	0	0	0	0	0
KP_F032-KP_R062	Bacteria	C1-C9	8.67	19341	203802	74.25	571	198	8	1408	8	1414	1401	-	0	0	2842	0	0	194	0	0	0	0	0
KP_F032-KP_R063	Bacteria	C1-C10	2.69	6010	217133	60.47	465	304	8	1507	8	1503	1499	-	0	0	2842	0	0	194	0	0	0	0	0
KP_F032-KP_R066	Bacteria	C1-C10	2.6	5807	217336	60.21	463	306	8	1508	8	1504	1500	-	0	0	2842	0	0	194	0	0	0	0	0
KP_F032-KP_R074	Bacteria	C1-C7	13.29	29646	193497	75.55	581	188	8	1116	8	1115	1109	-	0	0	2842	0	0	194	0	0	0	0	0
KP_F032-KP_R075	Bacteria	C1-C9	8.58	19155	203988	74.12	570	199	8	1408	8	1413	1400	-	0	0	2842	0	0	194	0	0	0	0	0
KP_F032-KP_R076	Bacteria	C1-C9	8.97	20005	203138	74.64	574	195	8	1408	8	1413	1400	-	0	0	2842	0	0	194	0	0	0	0	0
KP_F032-KP_R077	Bacteria	C1-C9	7.91	17650	205493	72.17	555	214	8	1408	8	1414	1401	-	0	0	2842	0	0	194	0	0	0	0	0
KP_F032-KP_R078	Bacteria	C1-C9	8.71	19429	203714	74.25	571	198	8	1407	8	1413	1400	-	0	0	2842	0	0	194	0	0	0	0	0
KP_F032-OP_R010	Bacteria	C1-C5	13.13	29301	193842	73.86	568	201	8	808	8	807	800	-	0	0	2842	0	0	194	0	0	0	0	0
KP_F032-OP_R014	Bacteria	C1-C5	13.13	29301	193842	73.86	568	201	8	808	8	807	800	-	0	0	2842	0	0	194	0	0	0	0	0
KP_F032-OP_R020	Bacteria	C1-C5	13.14	29325	193818	73.99	569	200	8	807	8	806	799	-	0	0	2842	0	0	194	0	0	0	0	0
KP_F032-OP_R026	Bacteria	C1-C7	11.95	26665	196478	61.38	472	297	8	1117	8	1115	1110	-	0	0	2842	0	0	194	0	0	0	0	0
KP_F032-OP_R029	Bacteria	C1-C8	13.05	29116	194027	69.44	534	235	8	1196	8	1195	1188	-	0	0	2842	0	0	194	0	0	0	0	0
KP_F032-OP_R030	Bacteria	C1-C7	13.26	29584	193559	75.68	582	187	8	1082	8	1081	1075	-	0	0	2842	0	0	194	0	0	0	0	0
KP_F032-OP_R032	Bacteria	C1-C5	13.16	29363	193780	74.12	570	199	8	804	8	803	796	-	0	0	2842	0	0	194	0	0	0	0	0
KP_F032-OP_R036	Bacteria	C1-C5	13.14	29312	193831	73.99	569	200	8	808	8	807	800	-	0	0	2842	0	0	194	0	0	0	0	0
KP_F032-OP_R048	Bacteria	C1-C5	13.12	29282	193861	73.86	568	201	8	808	8	807	800	-	0	0	2842	0	0	194	0	0	0	0	0
KP_F032-OP_R050	Bacteria	C1-C6	12.89	28771	194372	70.48	542	227	8	929	8	927	921	-	0	0	2842	0	0	194	0	0	0	0	0
KP_F032-OP_R052	Bacteria	C1-C6	12.91	28815	194328	70.48	542	227	8	929	8	927	921	-	0	0	2842	0	0	194	0	0	0	0	0
KP_F032-OP_R055	Bacteria	C1-C9	12.46	27808	195335	56.83	437	332	8	1389	8	1388	1382	-	0	0	2842	0	0	194	0	0	0	0	0
KP_F032-OP_R066	Bacteria	C1-C5	12.93	28844	194299	68.14	524	245	8	808	8	807	800	-	0	0	2842	0	0	194	0	0	0	0	0
KP_F032-OP_R067	Bacteria	C1-C6	12.92	28835	194308	70.48	542	227	8	929	8	927	921	-	0	0	2842	0	0	194	0	0	0	0	0
KP_F032-OP_R070	Bacteria	C1-C5	13.2	29458	193685	75.16	578	191	8	807	8	806	799	-	0	0	2842	0	0	194	0	0	0	0	0
KP_F032-OP_R073	Bacteria	C1-C6	13.23	29518	193625	75.29	579	190	8	896	8	895	888	-	0	0	2842	0	0	194	0	0	0	0	0
KP_F032-OP_R079	Bacteria	C1-C5	12.94	28883	194260	68.4	526	243	8	807	8	806	799	-	0	0	2842	0	0	194	0	0	0	0	0
KP_F032-OP_R086	Bacteria	C1-C5	12.87	28723	194420	67.36	518	251	8	804	8	803	796	-	0	0	2842	0	0	194	0	0	0	0	0
KP_F032-OP_R088	Bacteria	C1-C5	12.87	28710	194433	67.23	517	252	8	808	8	807	800	-	0	0	2842	0	0	194	0	0	0	0	0
KP_F032-OP_R089	Bacteria	C1-C6	8.83	19704	203439	66.84	514	255	8	930	8	935	923	-	0	0	2842	0	0	194	0	0	0	0	0
KP_F032-OP_R101	Bacteria	C1-C9	12.49	27869	195274	57.22	440	329	8	1388	8	1387	1381	-	0	0	2842	0	0	194	0	0	0	0	0
KP_F032-OP_R108	Bacteria	C1-C6	8.69	19395	203748	64.24	494	275	8	931	8	935	923	-	0	0	2842	0	0	194	0	0	0	0	0
KP_F032-OP_R119	Bacteria	C1-C5	13.1	29230	193913	72.95	561	208	8	808	8	807	800	-	0	0	2842	0	0	194	0	0	0	0	0
KP_F032-OP_R121	Bacteria	C1-C9	9.09	20293	202850	74.77	575	194	8	1408	8	1413	1400	-	0	0	2842	0	0	194	0	0	0	0	0
KP_F032-OP_R139	Bacteria	C1-C5	12.84	28660	194483	67.23	517	252	8	808	8	807	800	-	0	0	2842	0	0	194	0	0	0	0	0
KP_F032-OP_R143	Bacteria	C1-C6	8.7	19411	203732	64.24	494	275	8	930	8	934	922	-	0	0	2842	0	0	194	0	0	0	0	0
KP_F032-OP_UI005	Bacteria	C1-C6	8.69	19399	203744	64.24	494	275	8	931	8	935	923	-	0	0	2842	0	0	194	0	0	0	0	0
KP_F032-OP_UI009	Bacteria	C1-C7	12.66	28257	194886	67.49	519	250	8	1076	8	1075	1069	-	0	0	2842	0	0	194	0	0	0	0	0
KP_F033-KP_R029	Bacteria	C1-C5	12.99	28977	194166	67.49	519	250	8	808	8	807	800	-	0	0	2842	0	0	194	0	0	0	0	0
KP_F033-KP_R030	Bacteria	C1-C5	13.13	29292	193851	68.53	527	242	8	800	8	799	792	-	0	0	2842	0	0	194	0	0	0	0	0
KP_F033-KP_R031	Bacteria	C1-C5	13.38	29855	193288	75.55	581	188	8	804	8	803	796	-	0	0	2842	0	0	194	0	0	0	0	0
KP_F033-KP_R032	Bacteria	C1-C5	13.31	29702	193441	74.38	572	197	8	804	8	803	796	-	0	0	2842	0	0	194	0	0	0	0	0
KP_F033-KP_R033	Bacteria	C1-C5	13.05	29120	194023	67.49	519	250	8	805	8	804	797	-	0	0	2842	0	0	194	0	0	0	0	0
KP_F033-KP_R034	Bacteria	C1-C5	13.2	29451	193692	72.17	555	214	8	805	8	804	797	-	0	0	2842	0	0	194	0	0	0	0	0
KP_F033-KP_R035	Bacteria	C1-C5	13.28	29640	193503	74.25	571	198	8	807	8	806	799	-	0	0	2842	0	0	194	0	0	0	0	0
KP_F033-KP_R036	Bacteria	C1-C5	13.03	29083	194060	67.49	519	250	8	807	8	806	799	-	0	0	2842	0	0	194	0	0	0	0	0
KP_F033-KP_R037	Bacteria	C1-C5	13.02	29062	194081	67.49	519	250	8	808	8	807	800	-	0	0	2842	0	0	194	0	0	0	0	0
KP_F033-KP_R038	Bacteria	C1-C5	13.28	29635	193508	74.12	570	199	8	808	8	807	800	-	0	0	2842	0	0	194	0	0	0	0	0
KP_F033-KP_R039	Bacteria	C1-C6	8.75	19529	203614	65.02	500	269	8	931	8	935	923	-	0	0	2842	0	0	194	0	0	0	0	0
KP_F033-KP_R040	Bacteria	C1-C6	12.94	28871	194272	69.96	538	231	8	929	8	927	921	-	0	0	2842	0	0	194	0	0	0	0	0
KP_F033-KP_R041	Bacteria	C1-C6	12.95	28895	194248	69.96	538	231	8	928	8	926	920	-	0	0	2842	0	0	194	0	0	0	0	0
KP_F033-KP_R046	Bacteria	C1-C7	12.75	28452	194691	69.18	532	237	8	1066	8	1065	1058	-	0	0	2842	0	0	194	0	0	0	0	0
KP_F033-KP_R050	Bacteria	C1-C7	13.12	29271	193872	72.56	558	211	8	1066	8	1065	1059	-	0	0	2842	0	0	194	0	0	0	0	0
KP_F033-KP_R053	Bacteria	C1-C7	13.38	29867	193276	73.6	566	203	8	1079	8	1078	1072	-	0	0	2842	0	0	194	0	0	0	0	0
KP_F033-KP_R054	Bacteria	C1-C7	10.59	23631	199512	69.96	538	231	8	1082	8	1087	1074	-	0	0	2842	0	0	194	0	0	0	0	0
KP_F033-KP_R055	Bacteria	C1-C7	10.58	23608	199535	69.96	538	231	8	1083	8	1088	1075	-	0	0	2842	0	0	194	0	0	0	0	0
KP_F033-KP_R056	Bacteria	C1-C7	13.04	29107	194036	62.68	482	287	8	1117	8	1115	1109	-	0	0	2842	0	0	194	0	0	0	0	0
KP_F033-KP_R057	Bacteria	C1-C7	12.15	27103	196040	63.33	487	282	8	1117	8	1115	1109	-	0	0	2842	0	0	194	0	0	0	0	0
KP_F033-KP_R060	Bacteria	C1-C9	9.12	20353	202790	74.9	576	193	8	1409	8	1414	1401	-	0	0	2842	0	0	194	0	0	0	0	0
KP_F033-KP_R061	Bacteria	C1-C9	8.72	19468	203675	74.38	572	197	8	1408	8	1414	1401	-	0	0	2842	0	0	194	0	0	0	0	0
KP_F033-KP_R062	Bacteria	C1-C9	8.73	19476	203667	74.38	572	197	8	1408	8	1414	1401	-	0	0	2842	0	0	194	0	0	0	0	0
KP_F033-KP_R063	Bacteria	C1-C10	2.72	6071	217072	60.47	465	304	8	1507	8	1503	1499	-	0	0	2842	0	0	194	0	0	0	0	0
KP_F033-KP_R066	Bacteria	C1-C10	2.63	5868	217275	60.21	463	306	8	1508	8	1504	1500	-	0	0	2842	0	0	194	0	0	0	0	0
KP_F033-KP_R074	Bacteria	C1-C7	13.44	29987	193156	75.81	583	186	8	1116	8	1115	1109	-	0	0	2842	0	0	194	0	0	0	0	0
KP_F033-KP_R075	Bacteria	C1-C9	8.65	19293	203850	74.25	571	198	8	1408	8	1413	1400	-	0	0	2842	0	0	194	0	0	0	0	0
KP_F033-KP_R076	Bacteria	C1-C9	9.04	20168	202975	74.77	575	194	8	1408	8	1413	1400	-	0	0	2842	0	0	194	0	0	0	0	0
KP_F033-KP_R077	Bacteria	C1-C9	7.97	17776	205367	72.3	556	213	8	1408	8	1414	1401	-	0	0	2842	0	0	194	0	0	0	0	0
KP_F033-KP_R078	Bacteria	C1-C9	8.77	19568	203575	74.38	572	197	8	1407	8	1413	1400	-	0	0	2842	0	0	194	0	0	0	0	0
KP_F033-OP_R010	Bacteria	C1-C5	13.28	29635	193508	74.12	570	199	8	808	8	807	800	-	0	0	2842	0	0	194	0	0	0	0	0
KP_F033-OP_R014	Bacteria	C1-C5	13.28	29635	193508	74.12	570	199	8	808	8	807	800	-	0	0	2842	0	0	194	0	0	0	0	0
KP_F033-OP_R020	Bacteria	C1-C5	13.29	29659	193484	74.25	571	198	8	807	8	806	799	-	0	0	2842	0	0	194	0	0	0	0	0
KP_F033-OP_R026	Bacteria	C1-C7	12.09	26978	196165	61.64	474	295	8	1117	8	1115	1109	-	0	0	2842	0	0	194	0	0	0	0	0
KP_F033-OP_R029	Bacteria	C1-C8	13.2	29453	193690	69.7	536	233	8	1196	8	1195	1188	-	0	0	2842	0	0	194	0	0	0	0	0
KP_F033-OP_R030	Bacteria	C1-C7	13.41	29922	193221	75.94	584	185	8	1082	8	1081	1075	-	0	0	2842	0	0	194	0	0	0	0	0
KP_F033-OP_R032	Bacteria	C1-C5	13.31	29700	193443	74.38	572	197	8	804	8	803	796	-	0	0	2842	0	0	194	0	0	0	0	0
KP_F033-OP_R036	Bacteria	C1-C5	13.29	29646	193497	74.25	571	198	8	808	8	807	800	-	0	0	2842	0	0	194	0	0	0	0	0
KP_F033-OP_R048	Bacteria	C1-C5	13.27	29616	193527	74.12	570	199	8	808	8	807	800	-	0	0	2842	0	0	194	0	0	0	0	0
KP_F033-OP_R050	Bacteria	C1-C6	12.96	28918	194225	70.61	543	226	8	929	8	927	921	-	0	0	2842	0	0	194	0	0	0	0	0
KP_F033-OP_R052	Bacteria	C1-C6	12.98	28963	194180	70.61	543	226	8	929	8	927	921	-	0	0	2842	0	0	194	0	0	0	0	0
KP_F033-OP_R055	Bacteria	C1-C9	12.52	27938	195205	56.96	438	331	8	1389	8	1388	1382	-	0	0	2842	0	0	194	0	0	0	0	0
KP_F033-OP_R066	Bacteria	C1-C5	13.08	29177	193966	68.4	526	243	8	808	8	807	800	-	0	0	2842	0	0	194	0	0	0	0	0
KP_F033-OP_R067	Bacteria	C1-C6	12.99	28983	194160	70.61	543	226	8	929	8	927	921	-	0	0	2842	0	0	194	0	0	0	0	0
KP_F033-OP_R070	Bacteria	C1-C5	13.35	29793	193350	75.42	580	189	8	807	8	806	799	-	0	0	2842	0	0	194	0	0	0	0	0
KP_F033-OP_R073	Bacteria	C1-C6	13.38	29857	193286	75.55	581	188	8	896	8	895	888	-	0	0	2842	0	0	194	0	0	0	0	0
KP_F033-OP_R079	Bacteria	C1-C5	13.09	29217	193926	68.66	528	241	8	807	8	806	799	-	0	0	2842	0	0	194	0	0	0	0	0
KP_F033-OP_R086	Bacteria	C1-C5	13.02	29059	194084	67.62	520	249	8	804	8	803	796	-	0	0	2842	0	0	194	0	0	0	0	0
KP_F033-OP_R088	Bacteria	C1-C5	13.02	29043	194100	67.49	519	250	8	808	8	807	800	-	0	0	2842	0	0	194	0	0	0	0	0
KP_F033-OP_R089	Bacteria	C1-C6	8.95	19982	203161	67.1	516	253	8	930	8	935	923	-	0	0	2842	0	0	194	0	0	0	0	0
KP_F033-OP_R101	Bacteria	C1-C9	12.55	27999	195144	57.35	441	328	8	1388	8	1387	1381	-	0	0	2842	0	0	194	0	0	0	0	0
KP_F033-OP_R108	Bacteria	C1-C6	8.73	19482	203661	64.37	495	274	8	931	8	935	923	-	0	0	2842	0	0	194	0	0	0	0	0
KP_F033-OP_R119	Bacteria	C1-C5	13.25	29565	193578	73.21	563	206	8	808	8	807	800	-	0	0	2842	0	0	194	0	0	0	0	0
KP_F033-OP_R121	Bacteria	C1-C9	9.17	20457	202686	74.9	576	193	8	1408	8	1413	1400	-	0	0	2842	0	0	194	0	0	0	0	0
KP_F033-OP_R139	Bacteria	C1-C5	12.99	28993	194150	67.49	519	250	8	808	8	807	800	-	0	0	2842	0	0	194	0	0	0	0	0
KP_F033-OP_R143	Bacteria	C1-C6	8.74	19498	203645	64.37	495	274	8	930	8	934	922	-	0	0	2842	0	0	194	0	0	0	0	0
KP_F033-OP_UI005	Bacteria	C1-C6	8.73	19486	203657	64.37	495	274	8	931	8	935	923	-	0	0	2842	0	0	194	0	0	0	0	0
KP_F033-OP_UI009	Bacteria	C1-C7	12.73	28404	194739	67.62	520	249	8	1076	8	1075	1068	-	0	0	2842	0	0	194	0	0	0	0	0
KP_F035-KP_R029	Bacteria	C1-C5	9.98	22277	200866	65.02	500	269	9	808	9	814	800	-	0	0	2842	0	0	194	0	0	0	0	0
KP_F035-KP_R030	Bacteria	C1-C5	10.12	22575	200568	66.19	509	260	9	800	9	806	791	-	0	0	2842	0	0	194	0	0	0	0	0
KP_F035-KP_R031	Bacteria	C1-C5	10.43	23271	199872	74.25	571	198	9	804	9	810	795	-	0	0	2842	0	0	194	0	0	0	0	0
KP_F035-KP_R032	Bacteria	C1-C5	10.36	23110	200033	72.95	561	208	9	804	9	810	796	-	0	0	2842	0	0	194	0	0	0	0	0
KP_F035-KP_R033	Bacteria	C1-C5	10.04	22410	200733	65.02	500	269	9	805	9	811	797	-	0	0	2842	0	0	194	0	0	0	0	0
KP_F035-KP_R034	Bacteria	C1-C5	10.26	22887	200256	70.48	542	227	9	805	9	811	797	-	0	0	2842	0	0	194	0	0	0	0	0
KP_F035-KP_R035	Bacteria	C1-C5	10.33	23056	200087	72.82	560	209	9	807	9	813	799	-	0	0	2842	0	0	194	0	0	0	0	0
KP_F035-KP_R036	Bacteria	C1-C5	10.03	22384	200759	65.15	501	268	9	807	9	813	799	-	0	0	2842	0	0	194	0	0	0	0	0
KP_F035-KP_R037	Bacteria	C1-C5	10.02	22364	200779	65.15	501	268	9	808	9	814	800	-	0	0	2842	0	0	194	0	0	0	0	0
KP_F035-KP_R038	Bacteria	C1-C5	10.33	23052	200091	72.82	560	209	9	808	9	814	800	-	0	0	2842	0	0	194	0	0	0	0	0
KP_F035-KP_R039	Bacteria	C1-C6	8.84	19731	203412	64.5	496	273	9	930	9	935	921	-	0	0	2842	0	0	194	0	0	0	0	0
KP_F035-KP_R040	Bacteria	C1-C6	10.05	22419	200724	68.53	527	242	9	929	9	935	920	-	0	0	2842	0	0	194	0	0	0	0	0
KP_F035-KP_R041	Bacteria	C1-C6	10.06	22443	200700	68.66	528	241	9	928	9	934	919	-	0	0	2842	0	0	194	0	0	0	0	0
KP_F035-KP_R046	Bacteria	C1-C7	9.84	21952	201191	67.88	522	247	9	1066	9	1072	1058	-	0	0	2842	0	0	194	0	0	0	0	0
KP_F035-KP_R050	Bacteria	C1-C7	10.1	22546	200597	71.65	551	218	9	1067	9	1072	1058	-	0	0	2842	0	0	194	0	0	0	0	0
KP_F035-KP_R053	Bacteria	C1-C7	10.4	23217	199926	72.17	555	214	9	1080	9	1085	1071	-	0	0	2842	0	0	194	0	0	0	0	0
KP_F035-KP_R054	Bacteria	C1-C7	9.93	22153	200990	69.31	533	236	9	1082	9	1087	1073	-	0	0	2842	0	0	194	0	0	0	0	0
KP_F035-KP_R055	Bacteria	C1-C7	9.92	22136	201007	69.31	533	236	9	1083	9	1088	1074	-	0	0	2842	0	0	194	0	0	0	0	0
KP_F035-KP_R056	Bacteria	C1-V7	9.93	22149	200994	61.38	472	297	9	1117	9	1122	1109	-	0	0	2842	0	0	194	0	0	0	0	0
KP_F035-KP_R057	Bacteria	C1-V7	9.39	20943	202200	62.29	479	290	9	1118	9	1122	1109	-	0	0	2842	0	0	194	0	0	0	0	0
KP_F035-KP_R060	Bacteria	C1-C9	7.79	17387	205756	74.77	575	194	9	1409	9	1414	1400	-	0	0	2842	0	0	194	0	0	0	0	0
KP_F035-KP_R061	Bacteria	C1-C9	7.43	16584	206559	74.12	570	199	9	1408	9	1414	1400	-	0	0	2842	0	0	194	0	0	0	0	0
KP_F035-KP_R062	Bacteria	C1-C9	7.44	16595	206548	74.12	570	199	9	1408	9	1414	1400	-	0	0	2842	0	0	194	0	0	0	0	0
KP_F035-KP_R063	Bacteria	C1-C10	2.32	5179	217964	59.17	455	314	9	1505	9	1503	1497	-	0	0	2842	0	0	194	0	0	0	0	0
KP_F035-KP_R066	Bacteria	C1-C10	2.25	5010	218133	58.39	449	320	9	1506	9	1504	1498	-	0	0	2842	0	0	194	0	0	0	0	0
KP_F035-KP_R074	Bacteria	C1-V7	10.48	23382	199761	74.9	576	193	9	1117	9	1122	1108	-	0	0	2842	0	0	194	0	0	0	0	0
KP_F035-KP_R075	Bacteria	C1-C9	7.39	16498	206645	74.12	570	199	9	1407	9	1413	1399	-	0	0	2842	0	0	194	0	0	0	0	0
KP_F035-KP_R076	Bacteria	C1-C9	7.75	17292	205851	74.77	575	194	9	1408	9	1413	1399	-	0	0	2842	0	0	194	0	0	0	0	0
KP_F035-KP_R077	Bacteria	C1-C9	6.5	14499	208644	72.43	557	212	9	1408	9	1414	1400	-	0	0	2842	0	0	194	0	0	0	0	0
KP_F035-KP_R078	Bacteria	C1-C9	7.46	16651	206492	74.12	570	199	9	1407	9	1413	1399	-	0	0	2842	0	0	194	0	0	0	0	0
KP_F035-OP_R010	Bacteria	C1-C5	10.33	23052	200091	72.82	560	209	9	808	9	814	800	-	0	0	2842	0	0	194	0	0	0	0	0
KP_F035-OP_R014	Bacteria	C1-C5	10.33	23052	200091	72.82	560	209	9	808	9	814	800	-	0	0	2842	0	0	194	0	0	0	0	0
KP_F035-OP_R020	Bacteria	C1-C5	10.34	23078	200065	72.95	561	208	9	807	9	813	799	-	0	0	2842	0	0	194	0	0	0	0	0
KP_F035-OP_R026	Bacteria	C1-V7	9.33	20829	202314	60.34	464	305	9	1118	9	1122	1109	-	0	0	2842	0	0	194	0	0	0	0	0
KP_F035-OP_R029	Bacteria	C1-C8	10.24	22850	200293	68.14	524	245	9	1196	9	1201	1187	-	0	0	2842	0	0	194	0	0	0	0	0
KP_F035-OP_R030	Bacteria	C1-C7	10.45	23327	199816	74.51	573	196	9	1083	9	1088	1074	-	0	0	2842	0	0	194	0	0	0	0	0
KP_F035-OP_R032	Bacteria	C1-C5	10.35	23106	200037	72.69	559	210	9	804	9	810	796	-	0	0	2842	0	0	194	0	0	0	0	0
KP_F035-OP_R036	Bacteria	C1-C5	10.34	23064	200079	73.08	562	207	9	808	9	814	800	-	0	0	2842	0	0	194	0	0	0	0	0
KP_F035-OP_R048	Bacteria	C1-C5	10.32	23030	200113	72.69	559	210	9	808	9	814	800	-	0	0	2842	0	0	194	0	0	0	0	0
KP_F035-OP_R050	Bacteria	C1-C6	10.07	22466	200677	69.05	531	238	9	929	9	935	920	-	0	0	2842	0	0	194	0	0	0	0	0
KP_F035-OP_R052	Bacteria	C1-C6	10.08	22499	200644	69.18	532	237	9	929	9	935	920	-	0	0	2842	0	0	194	0	0	0	0	0
KP_F035-OP_R055	Bacteria	C1-C9	9.56	21334	201809	56.31	433	336	9	1390	9	1394	1381	-	0	0	2842	0	0	194	0	0	0	0	0
KP_F035-OP_R066	Bacteria	C1-C5	10.07	22476	200667	66.19	509	260	9	808	9	814	800	-	0	0	2842	0	0	194	0	0	0	0	0
KP_F035-OP_R067	Bacteria	C1-C6	10.09	22520	200623	69.18	532	237	9	929	9	935	920	-	0	0	2842	0	0	194	0	0	0	0	0
KP_F035-OP_R070	Bacteria	C1-C5	10.4	23217	199926	74.12	570	199	9	807	9	813	798	-	0	0	2842	0	0	194	0	0	0	0	0
KP_F035-OP_R073	Bacteria	C1-C6	10.44	23286	199857	74.64	574	195	9	896	9	903	888	-	0	0	2842	0	0	194	0	0	0	0	0
KP_F035-OP_R079	Bacteria	C1-C5	10.09	22523	200620	66.32	510	259	9	807	9	813	798	-	0	0	2842	0	0	194	0	0	0	0	0
KP_F035-OP_R086	Bacteria	C1-C5	10.02	22350	200793	65.15	501	268	9	804	9	810	796	-	0	0	2842	0	0	194	0	0	0	0	0
KP_F035-OP_R088	Bacteria	C1-C5	10.01	22342	200801	65.02	500	269	9	808	9	814	800	-	0	0	2842	0	0	194	0	0	0	0	0
KP_F035-OP_R089	Bacteria	C1-C6	8.98	20046	203097	66.58	512	257	9	930	9	935	921	-	0	0	2842	0	0	194	0	0	0	0	0
KP_F035-OP_R101	Bacteria	C1-C9	9.57	21366	201777	56.7	436	333	9	1389	9	1393	1380	-	0	0	2842	0	0	194	0	0	0	0	0
KP_F035-OP_R108	Bacteria	C1-C6	8.82	19684	203459	63.98	492	277	9	930	9	935	921	-	0	0	2842	0	0	194	0	0	0	0	0
KP_F035-OP_R119	Bacteria	C1-C5	10.31	23016	200127	71.91	553	216	9	808	9	814	800	-	0	0	2842	0	0	194	0	0	0	0	0
KP_F035-OP_R121	Bacteria	C1-C9	7.82	17458	205685	74.77	575	194	9	1408	9	1413	1399	-	0	0	2842	0	0	194	0	0	0	0	0
KP_F035-OP_R139	Bacteria	C1-C5	9.99	22295	200848	65.02	500	269	9	808	9	814	800	-	0	0	2842	0	0	194	0	0	0	0	0
KP_F035-OP_R143	Bacteria	C1-C6	8.83	19703	203440	64.11	493	276	9	929	9	934	920	-	0	0	2842	0	0	194	0	0	0	0	0
KP_F035-OP_UI005	Bacteria	C1-C6	8.82	19690	203453	63.98	492	277	9	930	9	935	921	-	0	0	2842	0	0	194	0	0	0	0	0
KP_F035-OP_UI009	Bacteria	C1-C7	9.8	21869	201274	66.19	509	260	9	1077	9	1082	1068	-	0	0	2842	0	0	194	0	0	0	0	0
KP_F036-KP_R029	Bacteria	C1-C5	17.82	39771	183372	69.7	536	233	9	806	9	807	798	-	0	0	2842	0	0	194	0	0	0	0	0
KP_F036-KP_R030	Bacteria	C1-C5	18.01	40187	182956	71.13	547	222	9	798	9	799	790	-	0	0	2842	0	0	194	0	0	0	0	0
KP_F036-KP_R031	Bacteria	C1-C5	18.84	42034	181109	79.71	613	156	9	802	9	803	794	-	0	0	2842	0	0	194	0	0	0	0	0
KP_F036-KP_R032	Bacteria	C1-C5	18.71	41760	181383	78.41	603	166	9	803	9	803	794	-	0	0	2842	0	0	194	0	0	0	0	0
KP_F036-KP_R033	Bacteria	C1-C5	17.92	39991	183152	69.83	537	232	9	803	9	804	795	-	0	0	2842	0	0	194	0	0	0	0	0
KP_F036-KP_R034	Bacteria	C1-C5	18.51	41306	181837	75.42	580	189	9	804	9	804	795	-	0	0	2842	0	0	194	0	0	0	0	0
KP_F036-KP_R035	Bacteria	C1-C5	18.68	41677	181466	78.15	601	168	9	806	9	806	797	-	0	0	2842	0	0	194	0	0	0	0	0
KP_F036-KP_R036	Bacteria	C1-C5	17.9	39947	183196	69.7	536	233	9	805	9	806	797	-	0	0	2842	0	0	194	0	0	0	0	0
KP_F036-KP_R037	Bacteria	C1-C5	17.89	39919	183224	69.7	536	233	9	806	9	807	798	-	0	0	2842	0	0	194	0	0	0	0	0
KP_F036-KP_R038	Bacteria	C1-C5	18.67	41654	181489	78.02	600	169	9	807	9	807	798	-	0	0	2842	0	0	194	0	0	0	0	0
KP_F036-KP_R039	Bacteria	C1-C6	13.28	29637	193506	68.4	526	243	9	928	9	935	920	-	0	0	2842	0	0	194	0	0	0	0	0
KP_F036-KP_R040	Bacteria	C1-C6	17.95	40047	183096	73.47	565	204	9	927	9	927	919	-	0	0	2842	0	0	194	0	0	0	0	0
KP_F036-KP_R041	Bacteria	C1-C6	17.97	40091	183052	73.47	565	204	9	926	9	926	918	-	0	0	2842	0	0	194	0	0	0	0	0
KP_F036-KP_R046	Bacteria	C1-C7	17.65	39390	183753	72.95	561	208	9	1064	9	1065	1056	-	0	0	2842	0	0	194	0	0	0	0	0
KP_F036-KP_R050	Bacteria	C1-C7	18.1	40400	182743	76.98	592	177	9	1065	9	1065	1056	-	0	0	2842	0	0	194	0	0	0	0	0
KP_F036-KP_R053	Bacteria	C1-C7	18.68	41674	181469	77.24	594	175	9	1078	9	1078	1069	-	0	0	2842	0	0	194	0	0	0	0	0
KP_F036-KP_R054	Bacteria	C1-C7	15.42	34418	188725	73.47	565	204	9	1080	9	1087	1072	-	0	0	2842	0	0	194	0	0	0	0	0
KP_F036-KP_R055	Bacteria	C1-C7	15.4	34374	188769	73.47	565	204	9	1081	9	1088	1073	-	0	0	2842	0	0	194	0	0	0	0	0
KP_F036-KP_R056	Bacteria	C1-C7	17.39	38805	184338	65.54	504	265	9	1115	9	1115	1107	-	0	0	2842	0	0	194	0	0	0	0	0
KP_F036-KP_R057	Bacteria	C1-C7	16.59	37020	186123	66.58	512	257	9	1116	9	1115	1107	-	0	0	2842	0	0	194	0	0	0	0	0
KP_F036-KP_R060	Bacteria	C1-C9	14.26	31819	191324	79.97	615	154	9	1407	9	1414	1398	-	0	0	2842	0	0	194	0	0	0	0	0
KP_F036-KP_R061	Bacteria	C1-C9	13.88	30981	192162	79.32	610	159	9	1407	9	1414	1398	-	0	0	2842	0	0	194	0	0	0	0	0
KP_F036-KP_R062	Bacteria	C1-C9	13.9	31010	192133	79.32	610	159	9	1407	9	1414	1398	-	0	0	2842	0	0	194	0	0	0	0	0
KP_F036-KP_R063	Bacteria	C1-C10	3.01	6719	216424	65.28	502	267	9	1506	9	1503	1497	-	0	0	2842	0	0	194	0	0	0	0	0
KP_F036-KP_R066	Bacteria	C1-C10	2.9	6467	216676	64.63	497	272	9	1507	9	1504	1498	-	0	0	2842	0	0	194	0	0	0	0	0
KP_F036-KP_R074	Bacteria	C1-C7	18.92	42218	180925	80.36	618	151	9	1115	9	1115	1106	-	0	0	2842	0	0	194	0	0	0	0	0
KP_F036-KP_R075	Bacteria	C1-C9	13.77	30737	192406	79.45	611	158	9	1406	9	1413	1397	-	0	0	2842	0	0	194	0	0	0	0	0
KP_F036-KP_R076	Bacteria	C1-C9	14.15	31567	191576	80.1	616	153	9	1406	9	1413	1397	-	0	0	2842	0	0	194	0	0	0	0	0
KP_F036-KP_R077	Bacteria	C1-C9	11.06	24672	198471	77.37	595	174	9	1407	9	1414	1398	-	0	0	2842	0	0	194	0	0	0	0	0
KP_F036-KP_R078	Bacteria	C1-C9	13.98	31196	191947	79.45	611	158	9	1406	9	1413	1397	-	0	0	2842	0	0	194	0	0	0	0	0
KP_F036-OP_R010	Bacteria	C1-C5	18.67	41654	181489	78.02	600	169	9	807	9	807	798	-	0	0	2842	0	0	194	0	0	0	0	0
KP_F036-OP_R014	Bacteria	C1-C5	18.67	41654	181489	78.02	600	169	9	807	9	807	798	-	0	0	2842	0	0	194	0	0	0	0	0
KP_F036-OP_R020	Bacteria	C1-C5	18.69	41707	181436	78.15	601	168	9	806	9	806	797	-	0	0	2842	0	0	194	0	0	0	0	0
KP_F036-OP_R026	Bacteria	C1-C7	16.42	36635	186508	64.11	493	276	9	1116	9	1115	1107	-	0	0	2842	0	0	194	0	0	0	0	0
KP_F036-OP_R029	Bacteria	C1-C8	18.36	40965	182178	72.95	561	208	9	1194	9	1195	1186	-	0	0	2842	0	0	194	0	0	0	0	0
KP_F036-OP_R030	Bacteria	C1-C7	18.84	42051	181092	79.71	613	156	9	1081	9	1081	1072	-	0	0	2842	0	0	194	0	0	0	0	0
KP_F036-OP_R032	Bacteria	C1-C5	18.71	41750	181393	78.02	600	169	9	803	9	803	794	-	0	0	2842	0	0	194	0	0	0	0	0
KP_F036-OP_R036	Bacteria	C1-C5	18.69	41698	181445	78.28	602	167	9	807	9	807	798	-	0	0	2842	0	0	194	0	0	0	0	0
KP_F036-OP_R048	Bacteria	C1-C5	18.65	41624	181519	78.02	600	169	9	807	9	807	798	-	0	0	2842	0	0	194	0	0	0	0	0
KP_F036-OP_R050	Bacteria	C1-C6	17.97	40101	183042	74.12	570	199	9	927	9	927	918	-	0	0	2842	0	0	194	0	0	0	0	0
KP_F036-OP_R052	Bacteria	C1-C6	18	40168	182975	74.12	570	199	9	927	9	927	918	-	0	0	2842	0	0	194	0	0	0	0	0
KP_F036-OP_R055	Bacteria	C1-C9	16.45	36701	186442	60.73	467	302	9	1389	9	1388	1380	-	0	0	2842	0	0	194	0	0	0	0	0
KP_F036-OP_R066	Bacteria	C1-C5	17.95	40049	183094	70.87	545	224	9	806	9	807	798	-	0	0	2842	0	0	194	0	0	0	0	0
KP_F036-OP_R067	Bacteria	C1-C6	18.02	40211	182932	74.12	570	199	9	927	9	927	918	-	0	0	2842	0	0	194	0	0	0	0	0
KP_F036-OP_R070	Bacteria	C1-C5	18.8	41950	181193	79.45	611	158	9	805	9	806	797	-	0	0	2842	0	0	194	0	0	0	0	0
KP_F036-OP_R073	Bacteria	C1-C6	18.85	42060	181083	79.97	615	154	9	894	9	895	886	-	0	0	2842	0	0	194	0	0	0	0	0
KP_F036-OP_R079	Bacteria	C1-C5	18.01	40190	182953	71	546	223	9	805	9	806	796	-	0	0	2842	0	0	194	0	0	0	0	0
KP_F036-OP_R086	Bacteria	C1-C5	17.87	39880	183263	69.96	538	231	9	802	9	803	794	-	0	0	2842	0	0	194	0	0	0	0	0
KP_F036-OP_R088	Bacteria	C1-C5	17.88	39889	183254	69.7	536	233	9	806	9	807	798	-	0	0	2842	0	0	194	0	0	0	0	0
KP_F036-OP_R089	Bacteria	C1-C6	13.72	30607	192536	70.48	542	227	9	928	9	935	919	-	0	0	2842	0	0	194	0	0	0	0	0
KP_F036-OP_R101	Bacteria	C1-C9	16.49	36804	186339	61.12	470	299	9	1388	9	1387	1379	-	0	0	2842	0	0	194	0	0	0	0	0
KP_F036-OP_R108	Bacteria	C1-C6	13.26	29583	193560	67.75	521	248	9	928	9	935	920	-	0	0	2842	0	0	194	0	0	0	0	0
KP_F036-OP_R119	Bacteria	C1-C5	18.61	41521	181622	76.59	589	180	9	807	9	807	798	-	0	0	2842	0	0	194	0	0	0	0	0
KP_F036-OP_R121	Bacteria	C1-C9	14.36	32040	191103	80.1	616	153	9	1406	9	1413	1397	-	0	0	2842	0	0	194	0	0	0	0	0
KP_F036-OP_R139	Bacteria	C1-C5	17.84	39800	183343	69.7	536	233	9	806	9	807	798	-	0	0	2842	0	0	194	0	0	0	0	0
KP_F036-OP_R143	Bacteria	C1-C6	13.27	29620	193523	67.75	521	248	9	927	9	934	919	-	0	0	2842	0	0	194	0	0	0	0	0
KP_F036-OP_UI005	Bacteria	C1-C6	13.26	29597	193546	67.75	521	248	9	928	9	935	920	-	0	0	2842	0	0	194	0	0	0	0	0
KP_F036-OP_UI009	Bacteria	C1-C7	17.5	39046	184097	71.26	548	221	9	1075	9	1075	1066	-	0	0	2842	0	0	194	0	0	0	0	0
KP_F037-KP_R029	Bacteria	C1-C5	19.43	43359	179784	66.32	510	259	20	808	20	807	788	-	0	0	2842	0	0	194	0	0	0	0	0
KP_F037-KP_R030	Bacteria	C1-C5	19.6	43738	179405	66.97	515	254	20	800	20	799	780	-	0	0	2842	0	0	194	0	0	0	0	0
KP_F037-KP_R031	Bacteria	C1-C5	20.63	46038	177105	75.42	580	189	20	804	20	803	784	-	0	0	2842	0	0	194	0	0	0	0	0
KP_F037-KP_R032	Bacteria	C1-C5	20.47	45678	177465	74.12	570	199	20	804	20	803	785	-	0	0	2842	0	0	194	0	0	0	0	0
KP_F037-KP_R033	Bacteria	C1-C5	19.54	43597	179546	66.45	511	258	20	805	20	804	785	-	0	0	2842	0	0	194	0	0	0	0	0
KP_F037-KP_R034	Bacteria	C1-C5	20.32	45338	177805	72.43	557	212	20	806	20	804	786	-	0	0	2842	0	0	194	0	0	0	0	0
KP_F037-KP_R035	Bacteria	C1-C5	20.43	45592	177551	73.86	568	201	20	807	20	806	788	-	0	0	2842	0	0	194	0	0	0	0	0
KP_F037-KP_R036	Bacteria	C1-C5	19.52	43562	179581	66.32	510	259	20	807	20	806	787	-	0	0	2842	0	0	194	0	0	0	0	0
KP_F037-KP_R037	Bacteria	C1-C5	19.51	43530	179613	66.32	510	259	20	808	20	807	788	-	0	0	2842	0	0	194	0	0	0	0	0
KP_F037-KP_R038	Bacteria	C1-C5	20.43	45597	177546	73.86	568	201	20	808	20	807	789	-	0	0	2842	0	0	194	0	0	0	0	0
KP_F037-KP_R039	Bacteria	C1-C6	14.35	32027	191116	65.28	502	267	20	931	20	935	911	-	0	0	2842	0	0	194	0	0	0	0	0
KP_F037-KP_R040	Bacteria	C1-C6	19.74	44053	179090	70.48	542	227	20	929	20	927	909	-	0	0	2842	0	0	194	0	0	0	0	0
KP_F037-KP_R041	Bacteria	C1-C6	19.77	44116	179027	70.48	542	227	20	928	20	926	908	-	0	0	2842	0	0	194	0	0	0	0	0
KP_F037-KP_R046	Bacteria	C1-C7	19.55	43632	179511	69.57	535	234	20	1066	20	1065	1046	-	0	0	2842	0	0	194	0	0	0	0	0
KP_F037-KP_R050	Bacteria	C1-C7	19.93	44465	178678	73.08	562	207	20	1066	20	1065	1046	-	0	0	2842	0	0	194	0	0	0	0	0
KP_F037-KP_R053	Bacteria	C1-C7	20.7	46188	176955	75.55	581	188	20	1079	20	1078	1060	-	0	0	2842	0	0	194	0	0	0	0	0
KP_F037-KP_R054	Bacteria	C1-C7	17.06	38074	185069	71.78	552	217	20	1082	20	1087	1062	-	0	0	2842	0	0	194	0	0	0	0	0
KP_F037-KP_R055	Bacteria	C1-C7	17.04	38029	185114	71.78	552	217	20	1083	20	1088	1063	-	0	0	2842	0	0	194	0	0	0	0	0
KP_F037-KP_R056	Bacteria	C1-C7	18.83	42020	181123	62.55	481	288	20	1117	20	1115	1097	-	0	0	2842	0	0	194	0	0	0	0	0
KP_F037-KP_R057	Bacteria	C1-C7	17.7	39501	183642	62.55	481	288	20	1118	20	1115	1098	-	0	0	2842	0	0	194	0	0	0	0	0
KP_F037-KP_R060	Bacteria	C1-C9	15.97	35631	187512	75.68	582	187	20	1409	20	1414	1389	-	0	0	2842	0	0	194	0	0	0	0	0
KP_F037-KP_R061	Bacteria	C1-C9	15.57	34754	188389	75.42	580	189	20	1409	20	1414	1389	-	0	0	2842	0	0	194	0	0	0	0	0
KP_F037-KP_R062	Bacteria	C1-C9	15.59	34790	188353	75.42	580	189	20	1409	20	1414	1389	-	0	0	2842	0	0	194	0	0	0	0	0
KP_F037-KP_R063	Bacteria	C1-C10	3.43	7653	215490	62.42	480	289	20	1507	20	1503	1487	-	0	0	2842	0	0	194	0	0	0	0	0
KP_F037-KP_R066	Bacteria	C1-C10	3.26	7282	215861	61.9	476	293	20	1508	20	1504	1488	-	0	0	2842	0	0	194	0	0	0	0	0
KP_F037-KP_R074	Bacteria	C1-C7	20.72	46232	176911	75.29	579	190	20	1116	20	1115	1097	-	0	0	2842	0	0	194	0	0	0	0	0
KP_F037-KP_R075	Bacteria	C1-C9	15.52	34635	188508	75.42	580	189	20	1408	20	1413	1388	-	0	0	2842	0	0	194	0	0	0	0	0
KP_F037-KP_R076	Bacteria	C1-C9	15.91	35509	187634	75.68	582	187	20	1408	20	1413	1388	-	0	0	2842	0	0	194	0	0	0	0	0
KP_F037-KP_R077	Bacteria	C1-C9	12.49	27872	195271	73.99	569	200	20	1409	20	1414	1389	-	0	0	2842	0	0	194	0	0	0	0	0
KP_F037-KP_R078	Bacteria	C1-C9	15.69	35014	188129	75.42	580	189	20	1408	20	1413	1388	-	0	0	2842	0	0	194	0	0	0	0	0
KP_F037-OP_R010	Bacteria	C1-C5	20.43	45597	177546	73.86	568	201	20	808	20	807	789	-	0	0	2842	0	0	194	0	0	0	0	0
KP_F037-OP_R014	Bacteria	C1-C5	20.43	45597	177546	73.86	568	201	20	808	20	807	789	-	0	0	2842	0	0	194	0	0	0	0	0
KP_F037-OP_R020	Bacteria	C1-C5	20.45	45630	177513	73.86	568	201	20	807	20	806	788	-	0	0	2842	0	0	194	0	0	0	0	0
KP_F037-OP_R026	Bacteria	C1-C7	17.59	39240	183903	60.73	467	302	20	1118	20	1115	1098	-	0	0	2842	0	0	194	0	0	0	0	0
KP_F037-OP_R029	Bacteria	C1-C8	20.24	45165	177978	69.7	536	233	20	1196	20	1193	1176	-	0	0	2842	0	0	194	0	0	0	0	0
KP_F037-OP_R030	Bacteria	C1-C7	20.64	46065	177078	75.16	578	191	20	1082	20	1081	1063	-	0	0	2842	0	0	194	0	0	0	0	0
KP_F037-OP_R032	Bacteria	C1-C5	20.47	45675	177468	73.99	569	200	20	804	20	803	785	-	0	0	2842	0	0	194	0	0	0	0	0
KP_F037-OP_R036	Bacteria	C1-C5	20.44	45609	177534	74.12	570	199	20	808	20	807	789	-	0	0	2842	0	0	194	0	0	0	0	0
KP_F037-OP_R048	Bacteria	C1-C5	20.42	45559	177584	73.86	568	201	20	808	20	807	789	-	0	0	2842	0	0	194	0	0	0	0	0
KP_F037-OP_R050	Bacteria	C1-C6	19.77	44118	179025	71.13	547	222	20	929	20	927	909	-	0	0	2842	0	0	194	0	0	0	0	0
KP_F037-OP_R052	Bacteria	C1-C6	19.81	44198	178945	71.13	547	222	20	929	20	927	909	-	0	0	2842	0	0	194	0	0	0	0	0
KP_F037-OP_R055	Bacteria	C1-C9	18.62	41552	181591	59.95	461	308	20	1389	20	1388	1369	-	0	0	2842	0	0	194	0	0	0	0	0
KP_F037-OP_R066	Bacteria	C1-C5	19.54	43602	179541	66.71	513	256	20	808	20	807	788	-	0	0	2842	0	0	194	0	0	0	0	0
KP_F037-OP_R067	Bacteria	C1-C6	19.83	44249	178894	71.13	547	222	20	929	20	927	909	-	0	0	2842	0	0	194	0	0	0	0	0
KP_F037-OP_R070	Bacteria	C1-C5	20.59	45951	177192	75.16	578	191	20	807	20	806	787	-	0	0	2842	0	0	194	0	0	0	0	0
KP_F037-OP_R073	Bacteria	C1-C6	20.65	46088	177055	75.29	579	190	20	896	20	895	876	-	0	0	2842	0	0	194	0	0	0	0	0
KP_F037-OP_R079	Bacteria	C1-C5	19.67	43882	179261	67.62	520	249	20	807	20	806	787	-	0	0	2842	0	0	194	0	0	0	0	0
KP_F037-OP_R086	Bacteria	C1-C5	19.48	43474	179669	66.58	512	257	20	804	20	803	784	-	0	0	2842	0	0	194	0	0	0	0	0
KP_F037-OP_R088	Bacteria	C1-C5	19.49	43492	179651	66.32	510	259	20	808	20	807	788	-	0	0	2842	0	0	194	0	0	0	0	0
KP_F037-OP_R089	Bacteria	C1-C6	15.06	33600	189543	67.75	521	248	20	930	20	935	910	-	0	0	2842	0	0	194	0	0	0	0	0
KP_F037-OP_R101	Bacteria	C1-C9	18.69	41699	181444	60.34	464	305	20	1388	20	1387	1368	-	0	0	2842	0	0	194	0	0	0	0	0
KP_F037-OP_R108	Bacteria	C1-C6	14.32	31962	191181	64.63	497	272	20	931	20	935	911	-	0	0	2842	0	0	194	0	0	0	0	0
KP_F037-OP_R119	Bacteria	C1-C5	20.47	45677	177466	73.6	566	203	20	808	20	807	789	-	0	0	2842	0	0	194	0	0	0	0	0
KP_F037-OP_R121	Bacteria	C1-C9	16.09	35900	187243	75.68	582	187	20	1408	20	1413	1388	-	0	0	2842	0	0	194	0	0	0	0	0
KP_F037-OP_R139	Bacteria	C1-C5	19.45	43393	179750	66.32	510	259	20	808	20	807	788	-	0	0	2842	0	0	194	0	0	0	0	0
KP_F037-OP_R143	Bacteria	C1-C6	14.34	32010	191133	64.63	497	272	20	930	20	934	910	-	0	0	2842	0	0	194	0	0	0	0	0
KP_F037-OP_UI005	Bacteria	C1-C6	14.33	31973	191170	64.63	497	272	20	931	20	935	911	-	0	0	2842	0	0	194	0	0	0	0	0
KP_F037-OP_UI009	Bacteria	C1-C7	19.65	43837	179306	70.35	541	228	20	1076	20	1075	1056	-	0	0	2842	0	0	194	0	0	0	0	0
KP_F044-KP_R046	Bacteria	C3-C7	90.46	201864	21279	86.61	666	103	340	1062	345	1075	722	-	0	0	2842	0	0	194	0	0	0	0	0
KP_F044-KP_R050	Bacteria	C3-C7	92.85	207196	15947	91.29	702	67	340	1062	332	1075	722	-	0	0	2842	0	0	194	0	0	0	0	0
KP_F044-KP_R053	Bacteria	C3-C7	95.86	213908	9235	92.98	715	54	340	1076	332	1088	735	-	0	0	2842	0	0	194	0	0	0	0	0
KP_F044-KP_R054	Bacteria	C3-C7	87.26	194712	28431	89.99	692	77	341	1078	332	1090	737	-	0	0	2842	0	0	194	0	0	0	0	0
KP_F044-KP_R055	Bacteria	C3-C7	87.07	194289	28854	89.99	692	77	341	1079	332	1091	738	-	0	0	2842	0	0	194	0	0	0	0	0
KP_F044-KP_R056	Bacteria	C3-V7	91.1	203285	19858	78.54	604	165	340	1113	332	1125	773	-	0	0	2842	0	0	194	0	0	0	0	0
KP_F044-KP_R057	Bacteria	C3-V7	88.31	197049	26094	79.32	610	159	340	1113	338	1125	772	-	0	0	2842	0	0	194	0	0	0	0	0
KP_F044-KP_R060	Bacteria	C3-C9	32.99	73617	149526	91.42	703	66	342	1408	338	1414	1066	-	0	0	2842	0	0	194	0	0	0	0	0
KP_F044-KP_R061	Bacteria	C3-C9	32.25	71954	151189	90.64	697	72	342	1408	338	1414	1066	-	0	0	2842	0	0	194	0	0	0	0	0
KP_F044-KP_R062	Bacteria	C3-C9	32.29	72054	151089	90.64	697	72	342	1408	338	1414	1066	-	0	0	2842	0	0	194	0	0	0	0	0
KP_F044-KP_R063	Bacteria	C3-C10	5.17	11530	211613	76.98	592	177	339	1506	332	1503	1166	-	0	0	2842	0	0	194	0	0	0	0	0
KP_F044-KP_R066	Bacteria	C3-C10	4.92	10970	212173	76.07	585	184	340	1507	332	1504	1167	-	0	0	2842	0	0	194	0	0	0	0	0
KP_F044-KP_R074	Bacteria	C3-V7	96.62	215612	7531	95.06	731	38	340	1112	332	1125	772	-	0	0	2842	0	0	194	0	0	0	0	0
KP_F044-KP_R075	Bacteria	C3-C9	32.16	71758	151385	90.64	697	72	342	1407	338	1413	1065	-	0	0	2842	0	0	194	0	0	0	0	0
KP_F044-KP_R076	Bacteria	C3-C9	32.91	73436	149707	91.42	703	66	342	1407	338	1413	1065	-	0	0	2842	0	0	194	0	0	0	0	0
KP_F044-KP_R077	Bacteria	C3-C9	28.13	62768	160375	89.47	688	81	342	1408	338	1414	1067	-	0	0	2842	0	0	194	0	0	0	0	0
KP_F044-KP_R078	Bacteria	C3-C9	32.45	72408	150735	90.64	697	72	342	1407	338	1413	1065	-	0	0	2842	0	0	194	0	0	0	0	0
KP_F044-OP_R026	Bacteria	C3-V7	87.58	195426	27717	75.94	584	185	340	1113	338	1125	772	-	0	0	2842	0	0	194	0	0	0	0	0
KP_F044-OP_R029	Bacteria	C3-C8	93.37	208354	14789	87.13	670	99	340	1192	332	1204	852	-	0	0	2842	0	0	194	0	0	0	0	0
KP_F044-OP_R030	Bacteria	C3-C7	96.03	214295	8848	95.06	731	38	340	1079	332	1091	738	-	0	0	2842	0	0	194	0	0	0	0	0
KP_F044-OP_R055	Bacteria	C3-C9	84.33	188177	34966	73.99	569	200	340	1386	332	1394	1046	-	0	0	2842	0	0	194	0	0	0	0	0
KP_F044-OP_R101	Bacteria	C3-C9	84.61	188792	34351	74.25	571	198	340	1385	332	1393	1045	-	0	0	2842	0	0	194	0	0	0	0	0
KP_F044-OP_R121	Bacteria	C3-C9	33.21	74104	149039	91.42	703	66	342	1407	338	1413	1065	-	0	0	2842	0	0	194	0	0	0	0	0
KP_F044-OP_UI009	Bacteria	C3-C7	89.82	200423	22720	85.83	660	109	340	1072	345	1085	732	-	0	0	2842	0	0	194	0	0	0	0	0
KP_F045-KP_R046	Bacteria	C3-C7	90.19	201252	21891	81.01	623	146	342	1062	347	1075	720	-	0	0	2842	0	0	194	0	0	0	0	0
KP_F045-KP_R050	Bacteria	C3-C7	92.58	206586	16557	85.7	659	110	342	1062	334	1075	720	-	0	0	2842	0	0	194	0	0	0	0	0
KP_F045-KP_R053	Bacteria	C3-C7	95.59	213303	9840	87.13	670	99	342	1076	334	1088	733	-	0	0	2842	0	0	194	0	0	0	0	0
KP_F045-KP_R054	Bacteria	C3-C7	86.99	194109	29034	84.14	647	122	343	1078	334	1090	735	-	0	0	2842	0	0	194	0	0	0	0	0
KP_F045-KP_R055	Bacteria	C3-C7	86.8	193683	29460	84.14	647	122	343	1079	334	1091	736	-	0	0	2842	0	0	194	0	0	0	0	0
KP_F045-KP_R056	Bacteria	C3-V7	90.83	202676	20467	72.69	559	210	342	1113	334	1125	771	-	0	0	2842	0	0	194	0	0	0	0	0
KP_F045-KP_R057	Bacteria	C3-V7	88.03	196436	26707	73.47	565	204	342	1113	347	1125	770	-	0	0	2842	0	0	194	0	0	0	0	0
KP_F045-KP_R060	Bacteria	C3-C9	32.7	72975	150168	85.83	660	109	344	1408	340	1414	1064	-	0	0	2842	0	0	194	0	0	0	0	0
KP_F045-KP_R061	Bacteria	C3-C9	31.96	71312	151831	85.05	654	115	344	1408	340	1414	1064	-	0	0	2842	0	0	194	0	0	0	0	0
KP_F045-KP_R062	Bacteria	C3-C9	32	71410	151733	85.05	654	115	344	1408	340	1414	1064	-	0	0	2842	0	0	194	0	0	0	0	0
KP_F045-KP_R063	Bacteria	C3-C10	5.15	11496	211647	74.38	572	197	341	1506	334	1503	1164	-	0	0	2842	0	0	194	0	0	0	0	0
KP_F045-KP_R066	Bacteria	C3-C10	4.9	10938	212205	73.6	566	203	342	1507	334	1504	1165	-	0	0	2842	0	0	194	0	0	0	0	0
KP_F045-KP_R074	Bacteria	C3-V7	96.35	215008	8135	89.21	686	83	342	1112	334	1125	770	-	0	0	2842	0	0	194	0	0	0	0	0
KP_F045-KP_R075	Bacteria	C3-C9	31.87	71119	152024	85.05	654	115	344	1407	340	1413	1063	-	0	0	2842	0	0	194	0	0	0	0	0
KP_F045-KP_R076	Bacteria	C3-C9	32.62	72796	150347	85.83	660	109	344	1407	340	1413	1063	-	0	0	2842	0	0	194	0	0	0	0	0
KP_F045-KP_R077	Bacteria	C3-C9	27.88	62205	160938	83.88	645	124	344	1408	340	1414	1065	-	0	0	2842	0	0	194	0	0	0	0	0
KP_F045-KP_R078	Bacteria	C3-C9	32.16	71764	151379	85.05	654	115	344	1407	340	1413	1063	-	0	0	2842	0	0	194	0	0	0	0	0
KP_F045-OP_R026	Bacteria	C3-V7	87.3	194814	28329	70.09	539	230	342	1113	340	1125	770	-	0	0	2842	0	0	194	0	0	0	0	0
KP_F045-OP_R029	Bacteria	C3-C8	93.1	207740	15403	81.4	626	143	342	1192	334	1204	850	-	0	0	2842	0	0	194	0	0	0	0	0
KP_F045-OP_R030	Bacteria	C3-C7	95.76	213688	9455	89.21	686	83	342	1078	334	1091	736	-	0	0	2842	0	0	194	0	0	0	0	0
KP_F045-OP_R055	Bacteria	C3-C9	84.2	187880	35263	70.22	540	229	342	1386	334	1397	1044	-	0	0	2842	0	0	194	0	0	0	0	0
KP_F045-OP_R101	Bacteria	C3-C9	84.47	188495	34648	70.48	542	227	342	1385	334	1396	1043	-	0	0	2842	0	0	194	0	0	0	0	0
KP_F045-OP_R121	Bacteria	C3-C9	32.92	73460	149683	85.83	660	109	344	1407	340	1413	1063	-	0	0	2842	0	0	194	0	0	0	0	0
KP_F045-OP_UI009	Bacteria	C3-C7	89.55	199815	23328	80.1	616	153	342	1072	347	1085	730	-	0	0	2842	0	0	194	0	0	0	0	0
KP_F046-KP_R046	Bacteria	C3-C7	90.84	202698	20445	86.61	666	103	343	1062	348	1075	719	-	0	0	2842	0	0	194	0	0	0	0	0
KP_F046-KP_R050	Bacteria	C3-C7	93.23	208042	15101	91.29	702	67	343	1062	335	1075	719	-	0	0	2842	0	0	194	0	0	0	0	0
KP_F046-KP_R053	Bacteria	C3-C7	96.25	214774	8369	92.98	715	54	343	1076	335	1088	732	-	0	0	2842	0	0	194	0	0	0	0	0
KP_F046-KP_R054	Bacteria	C3-C7	87.62	195529	27614	89.99	692	77	344	1078	335	1090	734	-	0	0	2842	0	0	194	0	0	0	0	0
KP_F046-KP_R055	Bacteria	C3-C7	87.43	195103	28040	89.99	692	77	344	1079	335	1091	735	-	0	0	2842	0	0	194	0	0	0	0	0
KP_F046-KP_R056	Bacteria	C3-V7	91.47	204101	19042	78.54	604	165	343	1113	335	1125	770	-	0	0	2842	0	0	194	0	0	0	0	0
KP_F046-KP_R057	Bacteria	C3-V7	88.67	197854	25289	79.32	610	159	343	1113	341	1125	769	-	0	0	2842	0	0	194	0	0	0	0	0
KP_F046-KP_R060	Bacteria	C3-C9	33.07	73801	149342	91.42	703	66	345	1408	341	1414	1063	-	0	0	2842	0	0	194	0	0	0	0	0
KP_F046-KP_R061	Bacteria	C3-C9	32.32	72130	151013	90.64	697	72	345	1408	341	1414	1063	-	0	0	2842	0	0	194	0	0	0	0	0
KP_F046-KP_R062	Bacteria	C3-C9	32.37	72230	150913	90.64	697	72	345	1408	341	1414	1063	-	0	0	2842	0	0	194	0	0	0	0	0
KP_F046-KP_R063	Bacteria	C3-C10	5.18	11557	211586	76.98	592	177	342	1506	335	1503	1163	-	0	0	2842	0	0	194	0	0	0	0	0
KP_F046-KP_R066	Bacteria	C3-C10	4.93	10997	212146	76.07	585	184	343	1507	335	1504	1164	-	0	0	2842	0	0	194	0	0	0	0	0
KP_F046-KP_R074	Bacteria	C3-V7	97.02	216488	6655	95.06	731	38	343	1112	335	1125	769	-	0	0	2842	0	0	194	0	0	0	0	0
KP_F046-KP_R075	Bacteria	C3-C9	32.24	71932	151211	90.64	697	72	345	1407	341	1413	1062	-	0	0	2842	0	0	194	0	0	0	0	0
KP_F046-KP_R076	Bacteria	C3-C9	32.99	73617	149526	91.42	703	66	345	1407	341	1413	1062	-	0	0	2842	0	0	194	0	0	0	0	0
KP_F046-KP_R077	Bacteria	C3-C9	28.19	62913	160230	89.47	688	81	345	1408	341	1414	1064	-	0	0	2842	0	0	194	0	0	0	0	0
KP_F046-KP_R078	Bacteria	C3-C9	32.53	72586	150557	90.64	697	72	345	1407	341	1413	1062	-	0	0	2842	0	0	194	0	0	0	0	0
KP_F046-OP_R026	Bacteria	C3-V7	87.94	196226	26917	75.94	584	185	343	1113	341	1125	769	-	0	0	2842	0	0	194	0	0	0	0	0
KP_F046-OP_R029	Bacteria	C3-C8	93.75	209192	13951	87.13	670	99	343	1192	335	1204	849	-	0	0	2842	0	0	194	0	0	0	0	0
KP_F046-OP_R030	Bacteria	C3-C7	96.42	215164	7979	95.06	731	38	343	1079	335	1091	735	-	0	0	2842	0	0	194	0	0	0	0	0
KP_F046-OP_R055	Bacteria	C3-C9	84.68	188949	34194	73.99	569	200	343	1386	335	1394	1043	-	0	0	2842	0	0	194	0	0	0	0	0
KP_F046-OP_R101	Bacteria	C3-C9	84.95	189566	33577	74.25	571	198	343	1385	335	1393	1042	-	0	0	2842	0	0	194	0	0	0	0	0
KP_F046-OP_R121	Bacteria	C3-C9	33.29	74290	148853	91.42	703	66	345	1407	341	1413	1062	-	0	0	2842	0	0	194	0	0	0	0	0
KP_F046-OP_UI009	Bacteria	C3-C7	90.19	201248	21895	85.83	660	109	343	1072	348	1085	729	-	0	0	2842	0	0	194	0	0	0	0	0
KP_F047-KP_R046	Bacteria	C3-C7	91.05	203174	19969	86.74	667	102	343	1062	348	1075	719	-	0	0	2842	0	0	194	0	0	0	0	0
KP_F047-KP_R050	Bacteria	C3-C7	93.45	208528	14615	91.42	703	66	343	1062	335	1075	719	-	0	0	2842	0	0	194	0	0	0	0	0
KP_F047-KP_R053	Bacteria	C3-C7	96.48	215279	7864	93.11	716	53	343	1076	335	1088	732	-	0	0	2842	0	0	194	0	0	0	0	0
KP_F047-KP_R054	Bacteria	C3-C7	87.84	196009	27134	90.12	693	76	344	1078	335	1090	734	-	0	0	2842	0	0	194	0	0	0	0	0
KP_F047-KP_R055	Bacteria	C3-C7	87.65	195583	27560	90.12	693	76	344	1079	335	1091	735	-	0	0	2842	0	0	194	0	0	0	0	0
KP_F047-KP_R056	Bacteria	C3-V7	91.67	204561	18582	78.54	604	165	343	1113	335	1125	770	-	0	0	2842	0	0	194	0	0	0	0	0
KP_F047-KP_R057	Bacteria	C3-V7	88.87	198304	24839	79.32	610	159	343	1113	348	1125	769	-	0	0	2842	0	0	194	0	0	0	0	0
KP_F047-KP_R060	Bacteria	C3-C9	33.13	73926	149217	91.55	704	65	345	1408	341	1414	1063	-	0	0	2842	0	0	194	0	0	0	0	0
KP_F047-KP_R061	Bacteria	C3-C9	32.38	72248	150895	90.77	698	71	345	1408	341	1414	1063	-	0	0	2842	0	0	194	0	0	0	0	0
KP_F047-KP_R062	Bacteria	C3-C9	32.42	72348	150795	90.77	698	71	345	1408	341	1414	1063	-	0	0	2842	0	0	194	0	0	0	0	0
KP_F047-KP_R063	Bacteria	C3-C10	5.19	11577	211566	77.11	593	176	342	1506	335	1503	1163	-	0	0	2842	0	0	194	0	0	0	0	0
KP_F047-KP_R066	Bacteria	C3-C10	4.94	11014	212129	76.2	586	183	343	1507	335	1504	1164	-	0	0	2842	0	0	194	0	0	0	0	0
KP_F047-KP_R074	Bacteria	C3-V7	97.24	216989	6154	95.19	732	37	343	1112	335	1125	769	-	0	0	2842	0	0	194	0	0	0	0	0
KP_F047-KP_R075	Bacteria	C3-C9	32.29	72049	151094	90.77	698	71	345	1407	341	1413	1062	-	0	0	2842	0	0	194	0	0	0	0	0
KP_F047-KP_R076	Bacteria	C3-C9	33.05	73741	149402	91.55	704	65	345	1407	341	1413	1062	-	0	0	2842	0	0	194	0	0	0	0	0
KP_F047-KP_R077	Bacteria	C3-C9	28.24	63018	160125	89.6	689	80	345	1408	341	1414	1064	-	0	0	2842	0	0	194	0	0	0	0	0
KP_F047-KP_R078	Bacteria	C3-C9	32.58	72705	150438	90.77	698	71	345	1407	341	1413	1062	-	0	0	2842	0	0	194	0	0	0	0	0
KP_F047-OP_R026	Bacteria	C3-V7	88.14	196672	26471	75.94	584	185	343	1113	341	1125	769	-	0	0	2842	0	0	194	0	0	0	0	0
KP_F047-OP_R029	Bacteria	C3-C8	93.95	209642	13501	87.26	671	98	343	1192	335	1204	849	-	0	0	2842	0	0	194	0	0	0	0	0
KP_F047-OP_R030	Bacteria	C3-C7	96.65	215669	7474	95.19	732	37	343	1078	335	1091	735	-	0	0	2842	0	0	194	0	0	0	0	0
KP_F047-OP_R055	Bacteria	C3-C9	84.86	189369	33774	74.12	570	199	343	1386	335	1394	1043	-	0	0	2842	0	0	194	0	0	0	0	0
KP_F047-OP_R101	Bacteria	C3-C9	85.14	189988	33155	74.38	572	197	343	1385	335	1393	1042	-	0	0	2842	0	0	194	0	0	0	0	0
KP_F047-OP_R121	Bacteria	C3-C9	33.35	74416	148727	91.55	704	65	345	1407	341	1413	1062	-	0	0	2842	0	0	194	0	0	0	0	0
KP_F047-OP_UI009	Bacteria	C3-C7	90.4	201724	21419	85.96	661	108	343	1072	348	1085	729	-	0	0	2842	0	0	194	0	0	0	0	0
KP_F048-KP_R046	Bacteria	C3-C7	91.09	203258	19885	88.56	681	88	345	1062	350	1075	717	-	0	0	2842	0	0	194	0	0	0	0	0
KP_F048-KP_R050	Bacteria	C3-C7	93.49	208612	14531	93.37	718	51	345	1062	337	1075	717	-	0	0	2842	0	0	194	0	0	0	0	0
KP_F048-KP_R053	Bacteria	C3-C7	96.45	215212	7931	94.67	728	41	345	1076	337	1088	730	-	0	0	2842	0	0	194	0	0	0	0	0
KP_F048-KP_R054	Bacteria	C3-C7	87.81	195949	27194	91.68	705	64	346	1078	337	1090	732	-	0	0	2842	0	0	194	0	0	0	0	0
KP_F048-KP_R055	Bacteria	C3-C7	87.62	195522	27621	91.68	705	64	346	1079	337	1091	733	-	0	0	2842	0	0	194	0	0	0	0	0
KP_F048-KP_R056	Bacteria	C3-V7	91.72	204663	18480	80.49	619	150	345	1113	337	1125	768	-	0	0	2842	0	0	194	0	0	0	0	0
KP_F048-KP_R057	Bacteria	C3-V7	88.92	198411	24732	81.27	625	144	345	1113	350	1125	767	-	0	0	2842	0	0	194	0	0	0	0	0
KP_F048-KP_R060	Bacteria	C3-C9	33.21	74098	149045	93.37	718	51	347	1408	343	1414	1061	-	0	0	2842	0	0	194	0	0	0	0	0
KP_F048-KP_R061	Bacteria	C3-C9	32.46	72423	150720	92.59	712	57	347	1408	343	1414	1061	-	0	0	2842	0	0	194	0	0	0	0	0
KP_F048-KP_R062	Bacteria	C3-C9	32.5	72523	150620	92.59	712	57	347	1408	343	1414	1061	-	0	0	2842	0	0	194	0	0	0	0	0
KP_F048-KP_R063	Bacteria	C3-C10	5.2	11594	211549	78.15	601	168	344	1506	337	1503	1161	-	0	0	2842	0	0	194	0	0	0	0	0
KP_F048-KP_R066	Bacteria	C3-C10	4.94	11031	212112	77.11	593	176	345	1507	337	1504	1162	-	0	0	2842	0	0	194	0	0	0	0	0
KP_F048-KP_R074	Bacteria	C3-V7	97.28	217066	6077	97.01	746	23	345	1112	337	1125	767	-	0	0	2842	0	0	194	0	0	0	0	0
KP_F048-KP_R075	Bacteria	C3-C9	32.36	72220	150923	92.59	712	57	347	1407	343	1413	1060	-	0	0	2842	0	0	194	0	0	0	0	0
KP_F048-KP_R076	Bacteria	C3-C9	33.12	73909	149234	93.37	718	51	347	1407	343	1413	1060	-	0	0	2842	0	0	194	0	0	0	0	0
KP_F048-KP_R077	Bacteria	C3-C9	28.3	63141	160002	91.42	703	66	347	1408	343	1414	1062	-	0	0	2842	0	0	194	0	0	0	0	0
KP_F048-KP_R078	Bacteria	C3-C9	32.66	72879	150264	92.59	712	57	347	1407	343	1413	1060	-	0	0	2842	0	0	194	0	0	0	0	0
KP_F048-OP_R026	Bacteria	C3-V7	88.18	196779	26364	77.89	599	170	345	1113	343	1125	767	-	0	0	2842	0	0	194	0	0	0	0	0
KP_F048-OP_R029	Bacteria	C3-C8	94	209764	13379	89.08	685	84	345	1192	337	1204	847	-	0	0	2842	0	0	194	0	0	0	0	0
KP_F048-OP_R030	Bacteria	C3-C7	96.68	215742	7401	97.14	747	22	345	1078	337	1091	733	-	0	0	2842	0	0	194	0	0	0	0	0
KP_F048-OP_R055	Bacteria	C3-C9	84.82	189277	33866	74.9	576	193	345	1386	337	1394	1041	-	0	0	2842	0	0	194	0	0	0	0	0
KP_F048-OP_R101	Bacteria	C3-C9	85.1	189895	33248	75.16	578	191	345	1385	337	1393	1040	-	0	0	2842	0	0	194	0	0	0	0	0
KP_F048-OP_R121	Bacteria	C3-C9	33.43	74587	148556	93.37	718	51	347	1407	343	1413	1060	-	0	0	2842	0	0	194	0	0	0	0	0
KP_F048-OP_UI009	Bacteria	C3-C7	90.38	201668	21475	87.39	672	97	345	1072	350	1085	727	-	0	0	2842	0	0	194	0	0	0	0	0
KP_F049-KP_R046	Bacteria	C3-C7	90.16	201178	21965	79.19	609	160	349	1062	354	1075	713	-	0	0	2842	0	0	194	0	0	0	0	0
KP_F049-KP_R050	Bacteria	C3-C7	92.55	206518	16625	84.01	646	123	349	1062	341	1075	713	-	0	0	2842	0	0	194	0	0	0	0	0
KP_F049-KP_R053	Bacteria	C3-C7	95.5	213100	10043	85.05	654	115	349	1076	341	1088	726	-	0	0	2842	0	0	194	0	0	0	0	0
KP_F049-KP_R054	Bacteria	C3-C7	86.89	193892	29251	82.05	631	138	350	1078	341	1090	728	-	0	0	2842	0	0	194	0	0	0	0	0
KP_F049-KP_R055	Bacteria	C3-C7	86.7	193469	29674	82.05	631	138	350	1079	341	1091	729	-	0	0	2842	0	0	194	0	0	0	0	0
KP_F049-KP_R056	Bacteria	C3-V7	90.81	202632	20511	71.39	549	220	349	1113	341	1125	764	-	0	0	2842	0	0	194	0	0	0	0	0
KP_F049-KP_R057	Bacteria	C3-V7	88.05	196478	26665	72.3	556	213	349	1113	354	1125	763	-	0	0	2842	0	0	194	0	0	0	0	0
KP_F049-KP_R060	Bacteria	C3-C9	32.67	72905	150238	84.27	648	121	351	1408	347	1414	1057	-	0	0	2842	0	0	194	0	0	0	0	0
KP_F049-KP_R061	Bacteria	C3-C9	31.93	71249	151894	83.49	642	127	351	1408	347	1414	1057	-	0	0	2842	0	0	194	0	0	0	0	0
KP_F049-KP_R062	Bacteria	C3-C9	31.97	71347	151796	83.49	642	127	351	1408	347	1414	1057	-	0	0	2842	0	0	194	0	0	0	0	0
KP_F049-KP_R063	Bacteria	C3-C10	5.15	11484	211659	72.82	560	209	348	1506	341	1503	1157	-	0	0	2842	0	0	194	0	0	0	0	0
KP_F049-KP_R066	Bacteria	C3-C10	4.9	10926	212217	72.04	554	215	349	1507	341	1504	1158	-	0	0	2842	0	0	194	0	0	0	0	0
KP_F049-KP_R074	Bacteria	C3-V7	96.33	214947	8196	87.65	674	95	349	1112	341	1125	763	-	0	0	2842	0	0	194	0	0	0	0	0
KP_F049-KP_R075	Bacteria	C3-C9	31.84	71047	152096	83.49	642	127	351	1407	347	1413	1056	-	0	0	2842	0	0	194	0	0	0	0	0
KP_F049-KP_R076	Bacteria	C3-C9	32.59	72716	150427	84.27	648	121	351	1407	347	1413	1056	-	0	0	2842	0	0	194	0	0	0	0	0
KP_F049-KP_R077	Bacteria	C3-C9	27.87	62182	160961	82.44	634	135	351	1408	347	1414	1058	-	0	0	2842	0	0	194	0	0	0	0	0
KP_F049-KP_R078	Bacteria	C3-C9	32.13	71698	151445	83.49	642	127	351	1407	347	1413	1056	-	0	0	2842	0	0	194	0	0	0	0	0
KP_F049-OP_R026	Bacteria	C3-V7	87.33	194866	28277	69.05	531	238	349	1113	347	1125	763	-	0	0	2842	0	0	194	0	0	0	0	0
KP_F049-OP_R029	Bacteria	C3-C8	93.08	207705	15438	80.62	620	149	349	1192	341	1204	843	-	0	0	2842	0	0	194	0	0	0	0	0
KP_F049-OP_R030	Bacteria	C3-C7	95.74	213634	9509	87.52	673	96	349	1079	341	1091	729	-	0	0	2842	0	0	194	0	0	0	0	0
KP_F049-OP_R055	Bacteria	C3-C9	84.25	187989	35154	69.31	533	236	349	1386	341	1397	1037	-	0	0	2842	0	0	194	0	0	0	0	0
KP_F049-OP_R101	Bacteria	C3-C9	84.52	188611	34532	69.57	535	234	349	1385	341	1396	1036	-	0	0	2842	0	0	194	0	0	0	0	0
KP_F049-OP_R121	Bacteria	C3-C9	32.89	73386	149757	84.27	648	121	351	1407	347	1413	1056	-	0	0	2842	0	0	194	0	0	0	0	0
KP_F049-OP_UI009	Bacteria	C3-C7	89.45	199597	23546	77.89	599	170	349	1072	354	1085	723	-	0	0	2842	0	0	194	0	0	0	0	0
KP_F050-KP_R046	Bacteria	C3-C7	85.57	190945	32198	81.53	627	142	374	1063	379	1075	689	-	0	0	2842	0	0	194	0	0	0	0	0
KP_F050-KP_R050	Bacteria	C3-C7	87.95	196244	26899	86.35	664	105	374	1063	379	1075	689	-	0	0	2842	0	0	194	0	0	0	0	0
KP_F050-KP_R053	Bacteria	C3-C7	90.87	202782	20361	86.74	667	102	375	1076	379	1088	702	-	0	0	2842	0	0	194	0	0	0	0	0
KP_F050-KP_R054	Bacteria	C3-C7	82.28	183610	39533	83.75	644	125	375	1078	379	1090	703	-	0	0	2842	0	0	194	0	0	0	0	0
KP_F050-KP_R055	Bacteria	C3-C7	82.11	183217	39926	83.75	644	125	375	1079	379	1091	704	-	0	0	2842	0	0	194	0	0	0	0	0
KP_F050-KP_R056	Bacteria	C3-V7	87.15	194467	28676	77.24	594	175	374	1114	366	1125	739	-	0	0	2842	0	0	194	0	0	0	0	0
KP_F050-KP_R057	Bacteria	C3-V7	85.32	190377	32766	77.76	598	171	375	1114	379	1125	739	-	0	0	2842	0	0	194	0	0	0	0	0
KP_F050-KP_R060	Bacteria	C3-C9	31.12	69442	153701	84.92	653	116	376	1410	372	1414	1033	-	0	0	2842	0	0	194	0	0	0	0	0
KP_F050-KP_R061	Bacteria	C3-C9	30.38	67783	155360	84.14	647	122	376	1410	372	1414	1033	-	0	0	2842	0	0	194	0	0	0	0	0
KP_F050-KP_R062	Bacteria	C3-C9	30.41	67868	155275	84.14	647	122	376	1410	372	1414	1033	-	0	0	2842	0	0	194	0	0	0	0	0
KP_F050-KP_R063	Bacteria	C3-C10	5.09	11351	211792	71	546	223	374	1506	366	1503	1132	-	0	0	2842	0	0	194	0	0	0	0	0
KP_F050-KP_R066	Bacteria	C3-C10	4.85	10814	212329	70.35	541	228	374	1507	366	1504	1133	-	0	0	2842	0	0	194	0	0	0	0	0
KP_F050-KP_R074	Bacteria	C3-V7	91.67	204545	18598	89.21	686	83	375	1113	379	1125	739	-	0	0	2842	0	0	194	0	0	0	0	0
KP_F050-KP_R075	Bacteria	C3-C9	30.33	67677	155466	84.14	647	122	376	1409	372	1413	1032	-	0	0	2842	0	0	194	0	0	0	0	0
KP_F050-KP_R076	Bacteria	C3-C9	31.08	69348	153795	84.92	653	116	376	1409	372	1413	1032	-	0	0	2842	0	0	194	0	0	0	0	0
KP_F050-KP_R077	Bacteria	C3-C9	26.74	59664	163479	82.83	637	132	376	1410	372	1414	1033	-	0	0	2842	0	0	194	0	0	0	0	0
KP_F050-KP_R078	Bacteria	C3-C9	30.56	68198	154945	84.14	647	122	376	1409	372	1413	1032	-	0	0	2842	0	0	194	0	0	0	0	0
KP_F050-OP_R026	Bacteria	C3-V7	84.6	188779	34364	74.77	575	194	375	1114	379	1125	739	-	0	0	2842	0	0	194	0	0	0	0	0
KP_F050-OP_R029	Bacteria	C3-C8	88.33	197112	26031	81.01	623	146	375	1193	379	1204	818	-	0	0	2842	0	0	194	0	0	0	0	0
KP_F050-OP_R030	Bacteria	C3-C7	91.12	203330	19813	89.08	685	84	375	1079	379	1091	705	-	0	0	2842	0	0	194	0	0	0	0	0
KP_F050-OP_R055	Bacteria	C3-C9	82.26	183562	39581	67.23	517	252	374	1386	379	1394	1012	-	0	0	2842	0	0	194	0	0	0	0	0
KP_F050-OP_R101	Bacteria	C3-C9	82.52	184149	38994	67.49	519	250	374	1385	379	1393	1011	-	0	0	2842	0	0	194	0	0	0	0	0
KP_F050-OP_R121	Bacteria	C3-C9	31.32	69889	153254	84.92	653	116	376	1409	372	1413	1032	-	0	0	2842	0	0	194	0	0	0	0	0
KP_F050-OP_UI009	Bacteria	C3-C7	84.85	189330	33813	79.58	612	157	374	1073	379	1085	699	-	0	0	2842	0	0	194	0	0	0	0	0
KP_F051-KP_R056	Bacteria	C4-V7	91.71	204644	18499	81.92	630	139	512	1113	522	1125	601	-	0	0	2842	0	0	194	0	0	0	0	0
KP_F051-KP_R057	Bacteria	C4-V7	88.91	198403	24740	82.7	636	133	512	1113	522	1125	601	-	0	0	2842	0	0	194	0	0	0	0	0
KP_F051-KP_R060	Bacteria	C4-C9	33.25	74197	148946	94.67	728	41	515	1408	515	1414	893	V3-C9	51.58	1466	1376	62.89	122	72	450	1351	453	1350	901
KP_F051-KP_R061	Bacteria	C4-C9	32.5	72521	150622	93.89	722	47	515	1408	515	1414	893	V3-C9	51.58	1466	1376	62.89	122	72	450	1351	453	1350	901
KP_F051-KP_R062	Bacteria	C4-C9	32.54	72620	150523	93.89	722	47	515	1408	515	1414	893	V3-C9	51.58	1466	1376	62.89	122	72	450	1351	453	1350	901
KP_F051-KP_R063	Bacteria	C4-C10	5.2	11612	211531	78.8	606	163	513	1506	522	1503	993	V3-V9	45.46	1292	1550	62.37	121	73	450	1439	453	1441	989
KP_F051-KP_R066	Bacteria	C4-C10	4.95	11046	212097	77.76	598	171	513	1507	522	1504	994	V3-V9	42.12	1197	1645	62.37	121	73	450	1440	453	1441	990
KP_F051-KP_R075	Bacteria	C4-C9	32.4	72307	150836	93.89	722	47	515	1407	515	1413	892	V3-C9	51.58	1466	1376	62.89	122	72	450	1350	453	1349	900
KP_F051-KP_R076	Bacteria	C4-C9	33.16	73995	149148	94.67	728	41	515	1407	515	1413	892	V3-C9	51.58	1466	1376	62.89	122	72	450	1350	453	1349	900
KP_F051-KP_R077	Bacteria	C4-C9	28.31	63182	159961	92.59	712	57	516	1408	515	1414	893	V3-C9	0.14	4	2838	1.03	2	192	445	1344	455	1356	899
KP_F051-KP_R078	Bacteria	C4-C9	32.7	72975	150168	93.89	722	47	515	1407	515	1413	892	V3-C9	51.58	1466	1376	62.89	122	72	450	1350	453	1349	900
KP_F051-OP_R026	Bacteria	C4-V7	88.18	196772	26371	79.32	610	159	512	1113	522	1125	601	-	0	0	2842	0	0	194	0	0	0	0	0
KP_F051-OP_R029	Bacteria	C4-C8	93.86	209451	13692	89.99	692	77	512	1192	522	1204	680	-	0	0	2842	0	0	194	0	0	0	0	0
KP_F051-OP_R055	Bacteria	C4-C9	84.71	189031	34112	75.29	579	190	513	1386	522	1397	873	-	0	0	2842	0	0	194	0	0	0	0	0
KP_F051-OP_R101	Bacteria	C4-C9	84.99	189649	33494	75.55	581	188	513	1385	522	1393	872	-	0	0	2842	0	0	194	0	0	0	0	0
KP_F051-OP_R121	Bacteria	C4-C9	33.47	74683	148460	94.67	728	41	515	1407	515	1413	892	V3-C9	51.58	1466	1376	62.89	122	72	450	1350	453	1349	900
KP_F052-KP_R060	Bacteria	C4-C9	32.72	73016	150127	91.55	704	65	517	1409	516	1414	892	V3-C9	3.24	92	2750	9.79	19	175	446	1343	443	1340	897
KP_F052-KP_R061	Bacteria	C4-C9	31.98	71353	151790	90.77	698	71	517	1409	516	1414	892	V3-C9	3.24	92	2750	9.79	19	175	446	1343	443	1340	897
KP_F052-KP_R062	Bacteria	C4-C9	32.02	71452	151691	90.77	698	71	517	1409	516	1414	892	V3-C9	3.24	92	2750	9.79	19	175	446	1343	443	1340	897
KP_F052-KP_R063	Bacteria	C4-C10	5.15	11488	211655	76.33	587	182	514	1506	523	1503	992	V3-C9	3.2	91	2751	9.79	19	175	446	1434	443	1430	987
KP_F052-KP_R066	Bacteria	C4-C10	4.9	10924	212219	75.42	580	189	514	1507	523	1504	993	V3-C9	3.2	91	2751	9.79	19	175	446	1435	443	1431	988
KP_F052-KP_R075	Bacteria	C4-C9	31.89	71163	151980	90.77	698	71	517	1408	516	1413	891	V3-C9	3.24	92	2750	9.79	19	175	446	1342	443	1339	896
KP_F052-KP_R076	Bacteria	C4-C9	32.64	72838	150305	91.55	704	65	517	1408	516	1413	891	V3-C9	3.24	92	2750	9.79	19	175	446	1342	443	1339	896
KP_F052-KP_R077	Bacteria	C4-C9	27.93	62333	160810	89.47	688	81	517	1409	516	1414	892	-	0	0	2842	0	0	194	0	0	0	0	0
KP_F052-KP_R078	Bacteria	C4-C9	32.18	71797	151346	90.77	698	71	517	1408	516	1413	891	V3-C9	3.24	92	2750	9.79	19	175	446	1342	443	1339	896
KP_F052-OP_R029	Bacteria	C4-C8	90.4	201730	21413	88.69	682	87	514	1193	523	1204	679	-	0	0	2842	0	0	194	0	0	0	0	0
KP_F052-OP_R055	Bacteria	C4-C9	81.39	181609	41534	72.3	556	213	515	1387	523	1397	872	-	0	0	2842	0	0	194	0	0	0	0	0
KP_F052-OP_R101	Bacteria	C4-C9	81.66	182209	40934	72.56	558	211	515	1386	523	1393	871	-	0	0	2842	0	0	194	0	0	0	0	0
KP_F052-OP_R121	Bacteria	C4-C9	32.93	73491	149652	91.55	704	65	517	1408	516	1413	891	V3-C9	3.24	92	2750	9.79	19	175	446	1342	443	1339	896
KP_F054-KP_R060	Bacteria	C4-C9	32.76	73106	150037	91.55	704	65	518	1409	517	1414	891	V3-C9	3.24	92	2750	9.79	19	175	447	1343	444	1340	896
KP_F054-KP_R061	Bacteria	C4-C9	32.02	71441	151702	90.77	698	71	518	1409	517	1414	891	V3-C9	3.24	92	2750	9.79	19	175	447	1343	444	1340	896
KP_F054-KP_R062	Bacteria	C4-C9	32.06	71541	151602	90.77	698	71	518	1409	517	1414	891	V3-C9	3.24	92	2750	9.79	19	175	447	1343	444	1340	896
KP_F054-KP_R063	Bacteria	C4-C10	5.16	11508	211635	76.46	588	181	515	1506	524	1503	991	V3-C9	3.2	91	2751	9.79	19	175	447	1434	444	1430	986
KP_F054-KP_R066	Bacteria	C4-C10	4.9	10943	212200	75.55	581	188	515	1507	524	1504	992	V3-C9	3.2	91	2751	9.79	19	175	447	1435	444	1431	987
KP_F054-KP_R075	Bacteria	C4-C9	31.93	71250	151893	90.77	698	71	518	1408	517	1413	890	V3-C9	3.24	92	2750	9.79	19	175	447	1342	444	1339	895
KP_F054-KP_R076	Bacteria	C4-C9	32.68	72927	150216	91.55	704	65	518	1408	517	1413	890	V3-C9	3.24	92	2750	9.79	19	175	447	1342	444	1339	895
KP_F054-KP_R077	Bacteria	C4-C9	27.97	62409	160734	89.47	688	81	518	1409	517	1414	891	-	0	0	2842	0	0	194	0	0	0	0	0
KP_F054-KP_R078	Bacteria	C4-C9	32.22	71886	151257	90.77	698	71	518	1408	517	1413	890	V3-C9	3.24	92	2750	9.79	19	175	447	1342	444	1339	895
KP_F054-OP_R029	Bacteria	C4-C8	90.57	202102	21041	88.69	682	87	515	1193	524	1204	678	-	0	0	2842	0	0	194	0	0	0	0	0
KP_F054-OP_R055	Bacteria	C4-C9	81.53	181939	41204	72.3	556	213	516	1387	524	1397	871	-	0	0	2842	0	0	194	0	0	0	0	0
KP_F054-OP_R101	Bacteria	C4-C9	81.8	182540	40603	72.56	558	211	516	1386	524	1393	870	-	0	0	2842	0	0	194	0	0	0	0	0
KP_F054-OP_R121	Bacteria	C4-C9	32.98	73582	149561	91.55	704	65	518	1408	517	1413	890	V3-C9	3.24	92	2750	9.79	19	175	447	1342	444	1339	895
KP_F055-KP_R060	Bacteria	C4-C9	32.45	72418	150725	86.09	662	107	519	1409	518	1414	890	V3-C9	1.83	52	2790	4.12	8	186	451	1346	461	1356	895
KP_F055-KP_R061	Bacteria	C4-C9	31.71	70753	152390	85.31	656	113	519	1409	518	1414	890	V3-C9	1.83	52	2790	4.12	8	186	451	1346	461	1356	895
KP_F055-KP_R062	Bacteria	C4-C9	31.75	70851	152292	85.31	656	113	519	1409	518	1414	890	V3-C9	1.83	52	2790	4.12	8	186	451	1346	461	1356	895
KP_F055-KP_R063	Bacteria	C4-C10	5.14	11469	211674	73.86	568	201	516	1506	525	1503	990	V3-V9	1.79	51	2791	4.12	8	186	451	1437	461	1447	986
KP_F055-KP_R066	Bacteria	C4-C10	4.89	10905	212238	73.08	562	207	516	1507	525	1504	991	V3-V9	1.79	51	2791	4.12	8	186	451	1438	461	1448	987
KP_F055-KP_R075	Bacteria	C4-C9	31.62	70562	152581	85.31	656	113	519	1408	518	1413	889	V3-C9	1.83	52	2790	4.12	8	186	451	1345	461	1355	894
KP_F055-KP_R076	Bacteria	C4-C9	32.37	72239	150904	86.09	662	107	519	1408	518	1413	889	V3-C9	1.83	52	2790	4.12	8	186	451	1345	461	1355	894
KP_F055-KP_R077	Bacteria	C4-C9	27.7	61811	161332	84.01	646	123	519	1409	518	1414	890	-	0	0	2842	0	0	194	0	0	0	0	0
KP_F055-KP_R078	Bacteria	C4-C9	31.9	71193	151950	85.31	656	113	519	1408	518	1413	889	V3-C9	1.83	52	2790	4.12	8	186	451	1345	461	1355	894
KP_F055-OP_R029	Bacteria	C4-C8	90.22	201313	21830	82.96	638	131	516	1193	525	1204	677	-	0	0	2842	0	0	194	0	0	0	0	0
KP_F055-OP_R055	Bacteria	C4-C9	81.31	181446	41697	67.36	518	251	517	1387	525	1397	870	-	0	0	2842	0	0	194	0	0	0	0	0
KP_F055-OP_R101	Bacteria	C4-C9	81.58	182045	41098	67.62	520	249	517	1386	525	1396	869	-	0	0	2842	0	0	194	0	0	0	0	0
KP_F055-OP_R121	Bacteria	C4-C9	32.66	72889	150254	86.09	662	107	519	1408	518	1413	889	V3-C9	1.83	52	2790	4.12	8	186	451	1345	461	1355	894
KP_F056-KP_R060	Bacteria	C4-C9	33.04	73724	149419	93.63	720	49	563	1408	563	1414	845	V3-C9	4.4	125	2717	8.76	17	177	524	1403	489	1341	880
KP_F056-KP_R061	Bacteria	C4-C9	32.4	72308	150835	93.11	716	53	563	1408	563	1414	845	V3-C9	4.4	125	2717	8.76	17	177	524	1403	489	1341	880
KP_F056-KP_R062	Bacteria	C4-C9	32.45	72408	150735	93.11	716	53	563	1408	563	1414	845	V3-C9	4.4	125	2717	8.76	17	177	524	1403	489	1341	880
KP_F056-KP_R063	Bacteria	C4-C10	5.19	11573	211570	78.15	601	168	561	1506	570	1503	945	V3-C9	3.62	103	2739	8.76	17	177	531	1506	489	1430	975
KP_F056-KP_R066	Bacteria	C4-C10	4.93	11011	212132	77.11	593	176	561	1507	570	1504	946	V3-C9	3.52	100	2742	8.76	17	177	532	1509	489	1431	977
KP_F056-KP_R075	Bacteria	C4-C9	32.31	72095	151048	93.11	716	53	563	1407	563	1413	844	V3-C9	4.4	125	2717	8.76	17	177	524	1402	489	1340	879
KP_F056-KP_R076	Bacteria	C4-C9	32.95	73523	149620	93.63	720	49	564	1407	563	1413	844	V3-C9	4.4	125	2717	8.76	17	177	524	1402	489	1340	879
KP_F056-KP_R077	Bacteria	C4-C9	28.24	63010	160133	91.94	707	62	564	1409	563	1414	845	-	0	0	2842	0	0	194	0	0	0	0	0
KP_F056-KP_R078	Bacteria	C4-C9	32.61	72757	150386	93.11	716	53	563	1407	563	1413	844	V3-C9	4.4	125	2717	8.76	17	177	524	1402	489	1340	879
KP_F056-OP_R029	Bacteria	C4-C8	93.56	208780	14363	89.6	689	80	560	1192	570	1204	632	-	0	0	2842	0	0	194	0	0	0	0	0
KP_F056-OP_R055	Bacteria	C4-C9	84.13	187722	35421	74.12	570	199	561	1386	570	1394	825	-	0	0	2842	0	0	194	0	0	0	0	0
KP_F056-OP_R101	Bacteria	C4-C9	84.4	188343	34800	74.38	572	197	561	1385	570	1393	824	-	0	0	2842	0	0	194	0	0	0	0	0
KP_F056-OP_R121	Bacteria	C4-C9	33.25	74205	148938	93.63	720	49	563	1407	563	1413	844	V3-C9	4.4	125	2717	8.76	17	177	524	1402	489	1340	879
KP_F057-KP_R060	Bacteria	C5-C9	31.21	69634	153509	84.53	650	119	784	1408	784	1414	624	C5-C9	0.07	2	2840	0.52	1	193	734	1363	734	1363	629
KP_F057-KP_R061	Bacteria	C5-C9	30.5	68050	155093	83.88	645	124	784	1408	784	1414	624	C5-C9	0.07	2	2840	0.52	1	193	734	1363	734	1363	629
KP_F057-KP_R062	Bacteria	C5-C9	30.54	68138	155005	83.88	645	124	784	1408	784	1414	624	C5-C9	0.07	2	2840	0.52	1	193	734	1363	734	1363	629
KP_F057-KP_R063	Bacteria	C5-C10	5.02	11210	211933	71.78	552	217	782	1506	791	1503	724	C5-V9	0.07	2	2840	0.52	1	193	734	1458	734	1458	724
KP_F057-KP_R066	Bacteria	C5-C10	4.77	10655	212488	70.87	545	224	782	1507	791	1504	725	C5-V9	0.07	2	2840	0.52	1	193	734	1459	734	1459	725
KP_F057-KP_R075	Bacteria	C5-C9	30.41	67856	155287	83.88	645	124	784	1407	784	1413	623	C5-C9	0.07	2	2840	0.52	1	193	734	1362	734	1362	628
KP_F057-KP_R076	Bacteria	C5-C9	31.12	69448	153695	84.53	650	119	784	1407	784	1413	623	C5-C9	0.07	2	2840	0.52	1	193	734	1362	734	1362	628
KP_F057-KP_R077	Bacteria	C5-C9	26.77	59727	163416	82.57	635	134	784	1408	784	1414	624	-	0	0	2842	0	0	194	0	0	0	0	0
KP_F057-KP_R078	Bacteria	C5-C9	30.67	68448	154695	83.88	645	124	784	1407	784	1413	623	C5-C9	0.07	2	2840	0.52	1	193	734	1362	734	1362	628
KP_F057-OP_R055	Bacteria	C5-C9	78.98	176239	46904	64.37	495	274	782	1386	791	1394	604	-	0	0	2842	0	0	194	0	0	0	0	0
KP_F057-OP_R101	Bacteria	C5-C9	79.24	176826	46317	64.63	497	272	782	1385	791	1393	603	-	0	0	2842	0	0	194	0	0	0	0	0
KP_F057-OP_R121	Bacteria	C5-C9	31.39	70055	153088	84.53	650	119	784	1407	784	1413	623	C5-C9	0.07	2	2840	0.52	1	193	734	1362	734	1362	628
KP_F058-KP_R060	Bacteria	C5-C9	31.04	69261	153882	83.22	640	129	784	1408	784	1414	624	-	0	0	2842	0	0	194	0	0	0	0	0
KP_F058-KP_R061	Bacteria	C5-C9	30.34	67693	155450	82.7	636	133	784	1408	784	1414	624	-	0	0	2842	0	0	194	0	0	0	0	0
KP_F058-KP_R062	Bacteria	C5-C9	30.37	67779	155364	82.7	636	133	784	1408	784	1414	624	-	0	0	2842	0	0	194	0	0	0	0	0
KP_F058-KP_R063	Bacteria	C5-C10	4.98	11108	212035	70.74	544	225	782	1506	791	1503	724	-	0	0	2842	0	0	194	0	0	0	0	0
KP_F058-KP_R066	Bacteria	C5-C10	4.73	10557	212586	69.96	538	231	782	1507	791	1504	725	-	0	0	2842	0	0	194	0	0	0	0	0
KP_F058-KP_R075	Bacteria	C5-C9	30.25	67498	155645	82.7	636	133	784	1407	784	1413	623	-	0	0	2842	0	0	194	0	0	0	0	0
KP_F058-KP_R076	Bacteria	C5-C9	30.95	69074	154069	83.22	640	129	784	1407	784	1413	623	-	0	0	2842	0	0	194	0	0	0	0	0
KP_F058-KP_R077	Bacteria	C5-C9	26.62	59399	163744	81.4	626	143	784	1408	784	1414	624	-	0	0	2842	0	0	194	0	0	0	0	0
KP_F058-KP_R078	Bacteria	C5-C9	30.51	68087	155056	82.7	636	133	784	1407	784	1413	623	-	0	0	2842	0	0	194	0	0	0	0	0
KP_F058-OP_R055	Bacteria	C5-C9	78.68	175571	47572	64.11	493	276	782	1386	791	1394	604	-	0	0	2842	0	0	194	0	0	0	0	0
KP_F058-OP_R101	Bacteria	C5-C9	78.94	176157	46986	64.37	495	274	782	1385	791	1393	603	-	0	0	2842	0	0	194	0	0	0	0	0
KP_F058-OP_R121	Bacteria	C5-C9	31.23	69678	153465	83.22	640	129	784	1407	784	1413	623	-	0	0	2842	0	0	194	0	0	0	0	0
KP_F059-KP_R077	Bacteria	C5-C9	28.16	62828	160315	92.33	710	59	785	1408	785	1414	623	C5-C9	0.14	4	2838	1.03	2	192	714	1344	724	1356	630
KP_F059-OP_R055	Bacteria	C5-C9	84.48	188502	34641	74.64	574	195	783	1386	792	1394	603	-	0	0	2842	0	0	194	0	0	0	0	0
KP_F059-OP_R101	Bacteria	C5-C9	84.75	189125	34018	74.9	576	193	783	1385	792	1393	602	-	0	0	2842	0	0	194	0	0	0	0	0
KP_F060-KP_R063	Bacteria	C6-C10	3.93	8779	214364	70.09	539	230	906	1506	915	1514	601	V5-C9	0.04	1	2841	0.52	1	193	838	1430	838	1430	592
KP_F060-KP_R066	Bacteria	C6-C10	3.77	8403	214740	69.44	534	235	906	1507	915	1515	602	V5-C9	0.04	1	2841	0.52	1	193	838	1431	838	1431	593
KP_F077-KP_R046	Bacteria	C3-C7	90.99	203042	20101	86.61	666	103	343	1062	348	1075	719	-	0	0	2842	0	0	194	0	0	0	0	0
KP_F077-KP_R050	Bacteria	C3-C7	93.39	208394	14749	91.29	702	67	343	1062	335	1075	719	C3-C6	2.74	78	2764	7.73	15	179	316	995	319	998	679
KP_F077-KP_R053	Bacteria	C3-C7	96.41	215140	8003	92.98	715	54	343	1076	335	1088	732	-	0	0	2842	0	0	194	0	0	0	0	0
KP_F077-KP_R054	Bacteria	C3-C7	87.78	195875	27268	89.99	692	77	344	1078	335	1090	734	-	0	0	2842	0	0	194	0	0	0	0	0
KP_F077-KP_R055	Bacteria	C3-C7	87.59	195449	27694	89.99	692	77	344	1079	335	1091	735	-	0	0	2842	0	0	194	0	0	0	0	0
KP_F077-KP_R056	Bacteria	C3-V7	91.62	204446	18697	78.54	604	165	343	1113	335	1125	770	-	0	0	2842	0	0	194	0	0	0	0	0
KP_F077-KP_R057	Bacteria	C3-V7	88.82	198191	24952	79.32	610	159	343	1113	348	1125	769	-	0	0	2842	0	0	194	0	0	0	0	0
KP_F077-KP_R060	Bacteria	C3-C9	33.11	73877	149266	91.42	703	66	345	1408	341	1414	1063	C3-C9	51.9	1475	1367	69.07	134	60	320	1353	321	1350	1033
KP_F077-KP_R061	Bacteria	C3-C9	32.36	72200	150943	90.64	697	72	345	1408	341	1414	1063	C3-C9	51.9	1475	1367	69.07	134	60	320	1353	321	1350	1033
KP_F077-KP_R062	Bacteria	C3-C9	32.4	72300	150843	90.64	697	72	345	1408	341	1414	1063	C3-C9	51.9	1475	1367	69.07	134	60	320	1353	321	1350	1033
KP_F077-KP_R063	Bacteria	C3-C10	5.19	11571	211572	76.98	592	177	342	1506	335	1503	1163	C3-V9	45.95	1306	1536	69.59	135	59	320	1441	321	1441	1122
KP_F077-KP_R066	Bacteria	C3-C10	4.93	11008	212135	76.07	585	184	343	1507	335	1504	1164	C3-V9	44.3	1259	1583	69.59	135	59	320	1442	321	1445	1123
KP_F077-KP_R074	Bacteria	C3-V7	97.18	216853	6290	95.06	731	38	343	1112	335	1125	769	C3-C7	50.95	1448	1394	65.98	128	66	320	1052	321	1049	732
KP_F077-KP_R075	Bacteria	C3-C9	32.27	72002	151141	90.64	697	72	345	1407	341	1413	1062	C3-C9	51.9	1475	1367	69.07	134	60	320	1352	321	1349	1032
KP_F077-KP_R076	Bacteria	C3-C9	33.02	73693	149450	91.42	703	66	345	1407	341	1413	1062	C3-C9	51.9	1475	1367	69.07	134	60	320	1352	321	1349	1032
KP_F077-KP_R077	Bacteria	C3-C9	28.22	62972	160171	89.47	688	81	345	1408	341	1414	1064	C3-C9	0.11	3	2839	0.52	1	193	323	1355	323	1356	1032
KP_F077-KP_R078	Bacteria	C3-C9	32.56	72657	150486	90.64	697	72	345	1407	341	1413	1062	C3-C9	51.9	1475	1367	69.07	134	60	320	1352	321	1349	1032
KP_F077-OP_R026	Bacteria	C3-V7	88.09	196561	26582	75.94	584	185	343	1113	341	1125	769	-	0	0	2842	0	0	194	0	0	0	0	0
KP_F077-OP_R029	Bacteria	C3-C8	93.9	209541	13602	87.13	670	99	343	1192	335	1204	849	-	0	0	2842	0	0	194	0	0	0	0	0
KP_F077-OP_R030	Bacteria	C3-C7	96.59	215529	7614	95.06	731	38	343	1078	335	1091	735	-	0	0	2842	0	0	194	0	0	0	0	0
KP_F077-OP_R055	Bacteria	C3-C9	84.82	189271	33872	73.99	569	200	343	1386	335	1394	1043	-	0	0	2842	0	0	194	0	0	0	0	0
KP_F077-OP_R101	Bacteria	C3-C9	85.1	189889	33254	74.25	571	198	343	1385	335	1393	1042	-	0	0	2842	0	0	194	0	0	0	0	0
KP_F077-OP_R121	Bacteria	C3-C9	33.33	74367	148776	91.42	703	66	345	1407	341	1413	1062	C3-C9	51.9	1475	1367	69.07	134	60	320	1352	321	1349	1032
KP_F077-OP_UI009	Bacteria	C3-C7	90.34	201593	21550	85.83	660	109	343	1072	348	1085	729	-	0	0	2842	0	0	194	0	0	0	0	0
KP_F078-KP_R056	Bacteria	C4-V7	88.26	196947	26196	80.62	620	149	513	1113	522	1125	601	-	0	0	2842	0	0	194	0	0	0	0	0
KP_F078-KP_R057	Bacteria	C4-V7	85.1	189889	33254	79.58	612	157	513	1113	522	1125	601	-	0	0	2842	0	0	194	0	0	0	0	0
KP_F078-KP_R060	Bacteria	C4-C9	32.71	72982	150161	91.55	704	65	516	1409	515	1414	893	V3-C9	51.3	1458	1384	62.89	122	72	450	1351	453	1350	901
KP_F078-KP_R061	Bacteria	C4-C9	31.96	71321	151822	90.77	698	71	516	1409	515	1414	893	V3-C9	51.3	1458	1384	62.89	122	72	450	1351	453	1350	901
KP_F078-KP_R062	Bacteria	C4-C9	32.01	71420	151723	90.77	698	71	516	1409	515	1414	893	V3-C9	51.3	1458	1384	62.89	122	72	450	1351	453	1350	901
KP_F078-KP_R063	Bacteria	C4-C10	5.15	11484	211659	76.33	587	182	513	1506	522	1503	993	V3-V9	45.18	1284	1558	62.37	121	73	450	1439	453	1441	989
KP_F078-KP_R066	Bacteria	C4-C10	4.89	10920	212223	75.42	580	189	513	1507	522	1504	994	V3-V9	41.84	1189	1653	62.37	121	73	450	1440	453	1441	990
KP_F078-KP_R075	Bacteria	C4-C9	31.88	71131	152012	90.77	698	71	516	1408	515	1413	892	V3-C9	51.3	1458	1384	62.89	122	72	450	1350	453	1349	900
KP_F078-KP_R076	Bacteria	C4-C9	32.63	72804	150339	91.55	704	65	516	1408	515	1413	892	V3-C9	51.3	1458	1384	62.89	122	72	450	1350	453	1349	900
KP_F078-KP_R077	Bacteria	C4-C9	27.92	62307	160836	89.47	688	81	516	1409	515	1414	893	V3-C9	0.14	4	2838	1.03	2	192	445	1344	455	1356	899
KP_F078-KP_R078	Bacteria	C4-C9	32.16	71765	151378	90.77	698	71	516	1408	515	1413	892	V3-C9	51.3	1458	1384	62.89	122	72	450	1350	453	1349	900
KP_F078-OP_R026	Bacteria	C4-V7	84.75	189108	34035	78.02	600	169	513	1113	522	1125	601	-	0	0	2842	0	0	194	0	0	0	0	0
KP_F078-OP_R029	Bacteria	C4-C8	90.35	201613	21530	88.69	682	87	513	1193	522	1204	680	-	0	0	2842	0	0	194	0	0	0	0	0
KP_F078-OP_R055	Bacteria	C4-C9	81.34	181496	41647	72.3	556	213	514	1387	522	1397	873	-	0	0	2842	0	0	194	0	0	0	0	0
KP_F078-OP_R101	Bacteria	C4-C9	81.6	182096	41047	72.56	558	211	514	1386	522	1393	872	-	0	0	2842	0	0	194	0	0	0	0	0
KP_F078-OP_R121	Bacteria	C4-C9	32.92	73457	149686	91.55	704	65	516	1408	515	1413	892	V3-C9	51.3	1458	1384	62.89	122	72	450	1350	453	1349	900
KP_F079-KP_R060	Bacteria	C4-C9	32.43	72368	150775	86.09	662	107	520	1409	519	1414	889	V3-C9	42.15	1198	1644	58.25	113	81	467	1368	458	1356	900
KP_F079-KP_R061	Bacteria	C4-C9	31.69	70704	152439	85.31	656	113	520	1409	519	1414	889	V3-C9	42.15	1198	1644	58.25	113	81	467	1368	458	1356	900
KP_F079-KP_R062	Bacteria	C4-C9	31.73	70802	152341	85.31	656	113	520	1409	519	1414	889	V3-C9	42.15	1198	1644	58.25	113	81	467	1368	458	1356	900
KP_F079-KP_R063	Bacteria	C4-C10	5.14	11460	211683	73.86	568	201	517	1506	526	1503	989	V3-V9	37.3	1060	1782	58.76	114	80	469	1459	458	1440	990
KP_F079-KP_R066	Bacteria	C4-C10	4.88	10895	212248	73.08	562	207	517	1507	526	1504	990	V3-V9	36.03	1024	1818	58.76	114	80	469	1460	458	1441	991
KP_F079-KP_R075	Bacteria	C4-C9	31.6	70517	152626	85.31	656	113	520	1408	519	1413	888	V3-C9	42.12	1197	1645	58.25	113	81	467	1366	458	1355	899
KP_F079-KP_R076	Bacteria	C4-C9	32.35	72194	150949	86.09	662	107	520	1408	519	1413	888	V3-C9	42.12	1197	1645	58.25	113	81	467	1366	458	1355	899
KP_F079-KP_R077	Bacteria	C4-C9	27.68	61773	161370	84.01	646	123	520	1409	519	1414	889	-	0	0	2842	0	0	194	0	0	0	0	0
KP_F079-KP_R078	Bacteria	C4-C9	31.88	71145	151998	85.31	656	113	520	1408	519	1413	888	V3-C9	42.15	1198	1644	58.25	113	81	467	1367	458	1355	899
KP_F079-OP_R029	Bacteria	C4-C8	90.16	201194	21949	82.96	638	131	517	1193	526	1204	676	-	0	0	2842	0	0	194	0	0	0	0	0
KP_F079-OP_R055	Bacteria	C4-C9	81.27	181343	41800	67.36	518	251	518	1387	526	1397	869	-	0	0	2842	0	0	194	0	0	0	0	0
KP_F079-OP_R101	Bacteria	C4-C9	81.54	181942	41201	67.62	520	249	518	1386	526	1396	868	-	0	0	2842	0	0	194	0	0	0	0	0
KP_F079-OP_R121	Bacteria	C4-C9	32.64	72841	150302	86.09	662	107	520	1408	519	1413	888	V3-C9	42.15	1198	1644	58.25	113	81	467	1367	458	1355	899
OP_F009-KP_R077	Bacteria	C5-C9	27.84	62124	161019	90.25	694	75	786	1409	785	1414	623	C5-C9	0.14	4	2838	1.03	2	192	714	1344	724	1356	630
OP_F009-OP_R055	Bacteria	C5-C9	81.52	181911	41232	73.08	562	207	784	1387	792	1394	603	-	0	0	2842	0	0	194	0	0	0	0	0
OP_F009-OP_R101	Bacteria	C5-C9	81.79	182518	40625	73.34	564	205	784	1386	792	1393	602	-	0	0	2842	0	0	194	0	0	0	0	0
OP_F014-KP_R056	Bacteria	C4-V7	88.31	197054	26089	80.62	620	149	513	1113	522	1125	601	-	0	0	2842	0	0	194	0	0	0	0	0
OP_F014-KP_R057	Bacteria	C4-V7	85.14	189993	33150	79.58	612	157	513	1113	522	1125	601	-	0	0	2842	0	0	194	0	0	0	0	0
OP_F014-KP_R077	Bacteria	C4-C9	27.93	62323	160820	89.47	688	81	516	1409	515	1414	893	V3-C9	0.14	4	2838	1.03	2	192	445	1344	455	1356	899
OP_F014-OP_R026	Bacteria	C4-V7	84.79	189212	33931	78.02	600	169	513	1113	522	1125	601	-	0	0	2842	0	0	194	0	0	0	0	0
OP_F014-OP_R029	Bacteria	C4-C8	90.4	201722	21421	88.69	682	87	513	1193	522	1204	680	-	0	0	2842	0	0	194	0	0	0	0	0
OP_F014-OP_R055	Bacteria	C4-C9	81.38	181593	41550	72.3	556	213	514	1387	522	1397	873	-	0	0	2842	0	0	194	0	0	0	0	0
OP_F014-OP_R101	Bacteria	C4-C9	81.65	182193	40950	72.56	558	211	514	1386	522	1393	872	-	0	0	2842	0	0	194	0	0	0	0	0
OP_F021-KP_R056	Bacteria	C4-V7	91.65	204505	18638	81.79	629	140	512	1113	522	1125	601	-	0	0	2842	0	0	194	0	0	0	0	0
OP_F021-KP_R057	Bacteria	C4-V7	88.85	198263	24880	82.57	635	134	512	1113	522	1125	601	-	0	0	2842	0	0	194	0	0	0	0	0
OP_F021-KP_R060	Bacteria	C4-C9	33.22	74135	149008	94.54	727	42	515	1408	515	1414	893	V3-C9	51.58	1466	1376	62.89	122	72	450	1351	453	1350	901
OP_F021-KP_R061	Bacteria	C4-C9	32.47	72459	150684	93.76	721	48	515	1408	515	1414	893	V3-C9	51.58	1466	1376	62.89	122	72	450	1351	453	1350	901
OP_F021-KP_R062	Bacteria	C4-C9	32.52	72558	150585	93.76	721	48	515	1408	515	1414	893	V3-C9	51.58	1466	1376	62.89	122	72	450	1351	453	1350	901
OP_F021-KP_R063	Bacteria	C4-C10	5.2	11603	211540	78.67	605	164	513	1506	522	1503	993	V3-V9	45.46	1292	1550	62.37	121	73	450	1439	453	1441	989
OP_F021-KP_R066	Bacteria	C4-C10	4.95	11037	212106	77.63	597	172	513	1507	522	1504	994	V3-V9	42.12	1197	1645	62.37	121	73	450	1440	453	1441	990
OP_F021-KP_R075	Bacteria	C4-C9	32.38	72245	150898	93.76	721	48	515	1407	515	1413	892	V3-C9	51.58	1466	1376	62.89	122	72	450	1350	453	1349	900
OP_F021-KP_R076	Bacteria	C4-C9	33.13	73933	149210	94.54	727	42	515	1407	515	1413	892	V3-C9	51.58	1466	1376	62.89	122	72	450	1350	453	1349	900
OP_F021-KP_R077	Bacteria	C4-C9	28.29	63129	160014	92.46	711	58	516	1408	515	1414	893	V3-C9	0.14	4	2838	1.03	2	192	445	1344	455	1356	899
OP_F021-KP_R078	Bacteria	C4-C9	32.67	72912	150231	93.76	721	48	515	1407	515	1413	892	V3-C9	51.58	1466	1376	62.89	122	72	450	1350	453	1349	900
OP_F021-OP_R026	Bacteria	C4-V7	88.12	196634	26509	79.19	609	160	512	1113	522	1125	601	-	0	0	2842	0	0	194	0	0	0	0	0
OP_F021-OP_R029	Bacteria	C4-C8	93.81	209339	13804	89.99	692	77	512	1192	522	1204	680	-	0	0	2842	0	0	194	0	0	0	0	0
OP_F021-OP_R055	Bacteria	C4-C9	84.67	188930	34213	75.29	579	190	513	1386	522	1394	873	-	0	0	2842	0	0	194	0	0	0	0	0
OP_F021-OP_R101	Bacteria	C4-C9	84.94	189548	33595	75.55	581	188	513	1385	522	1393	872	-	0	0	2842	0	0	194	0	0	0	0	0
OP_F021-OP_R121	Bacteria	C4-C9	33.44	74620	148523	94.54	727	42	515	1407	515	1413	892	V3-C9	51.58	1466	1376	62.89	122	72	450	1350	453	1349	900
OP_F025-KP_R029	Bacteria	C1-C5	10.22	22807	200336	66.32	510	259	11	808	11	814	797	-	0	0	2842	0	0	194	0	0	0	0	0
OP_F025-KP_R030	Bacteria	C1-C5	10.36	23116	200027	67.49	519	250	11	800	11	806	789	-	0	0	2842	0	0	194	0	0	0	0	0
OP_F025-KP_R031	Bacteria	C1-C5	10.69	23852	199291	75.68	582	187	11	804	11	810	793	-	0	0	2842	0	0	194	0	0	0	0	0
OP_F025-KP_R032	Bacteria	C1-C5	10.62	23689	199454	74.38	572	197	11	804	11	810	794	-	0	0	2842	0	0	194	0	0	0	0	0
OP_F025-KP_R033	Bacteria	C1-C5	10.28	22943	200200	66.32	510	259	11	805	11	811	794	-	0	0	2842	0	0	194	0	0	0	0	0
OP_F025-KP_R034	Bacteria	C1-C5	10.52	23464	199679	71.91	553	216	11	805	11	811	795	-	0	0	2842	0	0	194	0	0	0	0	0
OP_F025-KP_R035	Bacteria	C1-C5	10.59	23633	199510	74.25	571	198	11	807	11	813	797	-	0	0	2842	0	0	194	0	0	0	0	0
OP_F025-KP_R036	Bacteria	C1-C5	10.27	22916	200227	66.45	511	258	11	807	11	813	796	-	0	0	2842	0	0	194	0	0	0	0	0
OP_F025-KP_R037	Bacteria	C1-C5	10.26	22894	200249	66.45	511	258	11	808	11	814	797	-	0	0	2842	0	0	194	0	0	0	0	0
OP_F025-KP_R038	Bacteria	C1-C5	10.59	23627	199516	74.25	571	198	11	808	11	814	798	-	0	0	2842	0	0	194	0	0	0	0	0
OP_F025-KP_R039	Bacteria	C1-C6	9.05	20198	202945	65.93	507	262	11	930	11	935	919	-	0	0	2842	0	0	194	0	0	0	0	0
OP_F025-KP_R040	Bacteria	C1-C6	10.3	22991	200152	69.96	538	231	11	929	11	935	918	-	0	0	2842	0	0	194	0	0	0	0	0
OP_F025-KP_R041	Bacteria	C1-C6	10.31	23015	200128	70.09	539	230	11	928	11	934	917	-	0	0	2842	0	0	194	0	0	0	0	0
OP_F025-KP_R046	Bacteria	C1-C7	10.07	22461	200682	69.05	531	238	11	1066	11	1072	1056	-	0	0	2842	0	0	194	0	0	0	0	0
OP_F025-KP_R050	Bacteria	C1-C7	10.34	23077	200066	72.95	561	208	11	1067	11	1072	1056	-	0	0	2842	0	0	194	0	0	0	0	0
OP_F025-KP_R053	Bacteria	C1-C7	10.67	23800	199343	73.34	564	205	11	1080	11	1085	1069	-	0	0	2842	0	0	194	0	0	0	0	0
OP_F025-KP_R054	Bacteria	C1-C7	10.16	22682	200461	70.61	543	226	11	1082	11	1087	1071	-	0	0	2842	0	0	194	0	0	0	0	0
OP_F025-KP_R055	Bacteria	C1-C7	10.16	22665	200478	70.61	543	226	11	1083	11	1088	1072	-	0	0	2842	0	0	194	0	0	0	0	0
OP_F025-KP_R056	Bacteria	C1-V7	10.18	22715	200428	62.68	482	287	11	1117	11	1122	1107	-	0	0	2842	0	0	194	0	0	0	0	0
OP_F025-KP_R057	Bacteria	C1-V7	9.62	21476	201667	63.59	489	280	11	1118	11	1122	1107	-	0	0	2842	0	0	194	0	0	0	0	0
OP_F025-KP_R060	Bacteria	C1-C9	8.04	17933	205210	76.2	586	183	11	1409	11	1414	1398	-	0	0	2842	0	0	194	0	0	0	0	0
OP_F025-KP_R061	Bacteria	C1-C9	7.67	17116	206027	75.68	582	187	11	1408	11	1414	1398	-	0	0	2842	0	0	194	0	0	0	0	0
OP_F025-KP_R062	Bacteria	C1-C9	7.68	17129	206014	75.68	582	187	11	1408	11	1414	1398	-	0	0	2842	0	0	194	0	0	0	0	0
OP_F025-KP_R063	Bacteria	C1-C10	2.48	5529	217614	60.73	467	302	11	1505	11	1503	1494	-	0	0	2842	0	0	194	0	0	0	0	0
OP_F025-KP_R066	Bacteria	C1-C10	2.37	5278	217865	59.82	460	309	11	1506	11	1504	1496	-	0	0	2842	0	0	194	0	0	0	0	0
OP_F025-KP_R074	Bacteria	C1-V7	10.75	23977	199166	76.33	587	182	11	1117	11	1122	1106	-	0	0	2842	0	0	194	0	0	0	0	0
OP_F025-KP_R075	Bacteria	C1-C9	7.63	17030	206113	75.68	582	187	11	1407	11	1413	1397	-	0	0	2842	0	0	194	0	0	0	0	0
OP_F025-KP_R076	Bacteria	C1-C9	7.99	17838	205305	76.2	586	183	11	1408	11	1413	1397	-	0	0	2842	0	0	194	0	0	0	0	0
OP_F025-KP_R077	Bacteria	C1-C9	6.71	14978	208165	73.99	569	200	11	1408	11	1414	1397	-	0	0	2842	0	0	194	0	0	0	0	0
OP_F025-KP_R078	Bacteria	C1-C9	7.7	17189	205954	75.68	582	187	11	1407	11	1413	1397	-	0	0	2842	0	0	194	0	0	0	0	0
OP_F025-OP_R010	Bacteria	C1-C5	10.59	23627	199516	74.25	571	198	11	808	11	814	798	-	0	0	2842	0	0	194	0	0	0	0	0
OP_F025-OP_R014	Bacteria	C1-C5	10.59	23627	199516	74.25	571	198	11	808	11	814	798	-	0	0	2842	0	0	194	0	0	0	0	0
OP_F025-OP_R020	Bacteria	C1-C5	10.6	23655	199488	74.38	572	197	11	807	11	813	797	-	0	0	2842	0	0	194	0	0	0	0	0
OP_F025-OP_R026	Bacteria	C1-V7	9.57	21354	201789	61.64	474	295	11	1118	11	1122	1107	-	0	0	2842	0	0	194	0	0	0	0	0
OP_F025-OP_R029	Bacteria	C1-C8	10.5	23434	199709	69.57	535	234	11	1196	11	1201	1185	-	0	0	2842	0	0	194	0	0	0	0	0
OP_F025-OP_R030	Bacteria	C1-C7	10.72	23917	199226	75.68	582	187	11	1083	11	1088	1072	-	0	0	2842	0	0	194	0	0	0	0	0
OP_F025-OP_R032	Bacteria	C1-C5	10.61	23685	199458	74.12	570	199	11	804	11	810	794	-	0	0	2842	0	0	194	0	0	0	0	0
OP_F025-OP_R036	Bacteria	C1-C5	10.59	23639	199504	74.51	573	196	11	808	11	814	798	-	0	0	2842	0	0	194	0	0	0	0	0
OP_F025-OP_R048	Bacteria	C1-C5	10.58	23605	199538	74.12	570	199	11	808	11	814	798	-	0	0	2842	0	0	194	0	0	0	0	0
OP_F025-OP_R050	Bacteria	C1-C6	10.33	23042	200101	70.48	542	227	11	929	11	935	918	-	0	0	2842	0	0	194	0	0	0	0	0
OP_F025-OP_R052	Bacteria	C1-C6	10.34	23075	200068	70.61	543	226	11	929	11	935	918	-	0	0	2842	0	0	194	0	0	0	0	0
OP_F025-OP_R055	Bacteria	C1-C9	9.8	21860	201283	57.35	441	328	11	1390	11	1394	1379	-	0	0	2842	0	0	194	0	0	0	0	0
OP_F025-OP_R066	Bacteria	C1-C5	10.31	23006	200137	67.49	519	250	11	808	11	814	797	-	0	0	2842	0	0	194	0	0	0	0	0
OP_F025-OP_R067	Bacteria	C1-C6	10.35	23096	200047	70.61	543	226	11	929	11	935	918	-	0	0	2842	0	0	194	0	0	0	0	0
OP_F025-OP_R070	Bacteria	C1-C5	10.66	23796	199347	75.55	581	188	11	807	11	813	796	-	0	0	2842	0	0	194	0	0	0	0	0
OP_F025-OP_R073	Bacteria	C1-C6	10.7	23877	199266	76.07	585	184	11	896	11	903	885	-	0	0	2842	0	0	194	0	0	0	0	0
OP_F025-OP_R079	Bacteria	C1-C5	10.33	23057	200086	67.62	520	249	11	807	11	813	796	-	0	0	2842	0	0	194	0	0	0	0	0
OP_F025-OP_R086	Bacteria	C1-C5	10.26	22884	200259	66.45	511	258	11	804	11	810	793	-	0	0	2842	0	0	194	0	0	0	0	0
OP_F025-OP_R088	Bacteria	C1-C5	10.25	22872	200271	66.32	510	259	11	808	11	814	797	-	0	0	2842	0	0	194	0	0	0	0	0
OP_F025-OP_R089	Bacteria	C1-C6	9.2	20523	202620	68.01	523	246	11	930	11	935	919	-	0	0	2842	0	0	194	0	0	0	0	0
OP_F025-OP_R101	Bacteria	C1-C9	9.81	21893	201250	57.74	444	325	11	1389	11	1393	1378	-	0	0	2842	0	0	194	0	0	0	0	0
OP_F025-OP_R108	Bacteria	C1-C6	9.03	20147	202996	65.41	503	266	11	930	11	935	919	-	0	0	2842	0	0	194	0	0	0	0	0
OP_F025-OP_R119	Bacteria	C1-C5	10.57	23593	199550	73.34	564	205	11	808	11	814	798	-	0	0	2842	0	0	194	0	0	0	0	0
OP_F025-OP_R121	Bacteria	C1-C9	8.07	18010	205133	76.2	586	183	11	1408	11	1413	1397	-	0	0	2842	0	0	194	0	0	0	0	0
OP_F025-OP_R139	Bacteria	C1-C5	10.23	22825	200318	66.32	510	259	11	808	11	814	797	-	0	0	2842	0	0	194	0	0	0	0	0
OP_F025-OP_R143	Bacteria	C1-C6	9.04	20166	202977	65.54	504	265	11	929	11	934	918	-	0	0	2842	0	0	194	0	0	0	0	0
OP_F025-OP_UI005	Bacteria	C1-C6	9.03	20153	202990	65.41	503	266	11	930	11	935	919	-	0	0	2842	0	0	194	0	0	0	0	0
OP_F025-OP_UI009	Bacteria	C1-C7	10.03	22375	200768	67.1	516	253	11	1076	11	1082	1066	-	0	0	2842	0	0	194	0	0	0	0	0
OP_F030-KP_R056	Bacteria	C4-V7	88.25	196925	26218	80.62	620	149	513	1113	522	1125	601	-	0	0	2842	0	0	194	0	0	0	0	0
OP_F030-KP_R057	Bacteria	C4-V7	85.09	189867	33276	79.58	612	157	513	1113	522	1125	601	-	0	0	2842	0	0	194	0	0	0	0	0
OP_F030-KP_R060	Bacteria	C4-C9	32.7	72974	150169	91.55	704	65	516	1409	515	1414	893	V3-C9	3.24	92	2750	9.79	19	175	445	1343	442	1340	898
OP_F030-KP_R061	Bacteria	C4-C9	31.96	71313	151830	90.77	698	71	516	1409	515	1414	893	V3-C9	3.24	92	2750	9.79	19	175	445	1343	442	1340	898
OP_F030-KP_R062	Bacteria	C4-C9	32	71412	151731	90.77	698	71	516	1409	515	1414	893	V3-C9	3.24	92	2750	9.79	19	175	445	1343	442	1340	898
OP_F030-KP_R063	Bacteria	C4-C10	5.15	11481	211662	76.33	587	182	513	1506	522	1503	993	V3-C9	3.2	91	2751	9.79	19	175	445	1434	442	1430	988
OP_F030-KP_R066	Bacteria	C4-C10	4.89	10917	212226	75.42	580	189	513	1507	522	1504	994	V3-C9	3.2	91	2751	9.79	19	175	445	1435	442	1431	989
OP_F030-KP_R075	Bacteria	C4-C9	31.87	71123	152020	90.77	698	71	516	1408	515	1413	892	V3-C9	3.24	92	2750	9.79	19	175	445	1342	442	1339	897
OP_F030-KP_R076	Bacteria	C4-C9	32.62	72796	150347	91.55	704	65	516	1408	515	1413	892	V3-C9	3.24	92	2750	9.79	19	175	445	1342	442	1339	897
OP_F030-KP_R077	Bacteria	C4-C9	27.92	62299	160844	89.47	688	81	516	1409	515	1414	893	-	0	0	2842	0	0	194	0	0	0	0	0
OP_F030-KP_R078	Bacteria	C4-C9	32.16	71757	151386	90.77	698	71	516	1408	515	1413	892	V3-C9	3.24	92	2750	9.79	19	175	445	1342	442	1339	897
OP_F030-OP_R026	Bacteria	C4-V7	84.74	189086	34057	78.02	600	169	513	1113	522	1125	601	-	0	0	2842	0	0	194	0	0	0	0	0
OP_F030-OP_R029	Bacteria	C4-C8	90.34	201591	21552	88.69	682	87	513	1193	522	1204	680	-	0	0	2842	0	0	194	0	0	0	0	0
OP_F030-OP_R055	Bacteria	C4-C9	81.33	181476	41667	72.3	556	213	514	1387	522	1397	873	-	0	0	2842	0	0	194	0	0	0	0	0
OP_F030-OP_R101	Bacteria	C4-C9	81.6	182076	41067	72.56	558	211	514	1386	522	1393	872	-	0	0	2842	0	0	194	0	0	0	0	0
OP_F030-OP_R121	Bacteria	C4-C9	32.92	73449	149694	91.55	704	65	516	1408	515	1413	892	V3-C9	3.24	92	2750	9.79	19	175	445	1342	442	1339	897
OP_F032-KP_R029	Bacteria	C1-C5	18.26	40754	182389	71	546	223	11	806	11	807	795	-	0	0	2842	0	0	194	0	0	0	0	0
OP_F032-KP_R030	Bacteria	C1-C5	18.46	41189	181954	72.43	557	212	11	798	11	799	787	-	0	0	2842	0	0	194	0	0	0	0	0
OP_F032-KP_R031	Bacteria	C1-C5	19.31	43093	180050	81.14	624	145	11	802	11	803	792	-	0	0	2842	0	0	194	0	0	0	0	0
OP_F032-KP_R032	Bacteria	C1-C5	19.19	42814	180329	79.84	614	155	11	803	11	803	792	-	0	0	2842	0	0	194	0	0	0	0	0
OP_F032-KP_R033	Bacteria	C1-C5	18.37	40981	182162	71.13	547	222	11	803	11	804	792	-	0	0	2842	0	0	194	0	0	0	0	0
OP_F032-KP_R034	Bacteria	C1-C5	18.98	42355	180788	76.85	591	178	11	804	11	804	793	-	0	0	2842	0	0	194	0	0	0	0	0
OP_F032-KP_R035	Bacteria	C1-C5	19.15	42726	180417	79.58	612	157	11	806	11	806	795	-	0	0	2842	0	0	194	0	0	0	0	0
OP_F032-KP_R036	Bacteria	C1-C5	18.34	40935	182208	71	546	223	11	805	11	806	794	-	0	0	2842	0	0	194	0	0	0	0	0
OP_F032-KP_R037	Bacteria	C1-C5	18.33	40905	182238	71	546	223	11	806	11	807	795	-	0	0	2842	0	0	194	0	0	0	0	0
OP_F032-KP_R038	Bacteria	C1-C5	19.14	42702	180441	79.45	611	158	11	807	11	807	796	-	0	0	2842	0	0	194	0	0	0	0	0
OP_F032-KP_R039	Bacteria	C1-C6	13.66	30479	192664	69.83	537	232	11	928	11	935	917	-	0	0	2842	0	0	194	0	0	0	0	0
OP_F032-KP_R040	Bacteria	C1-C6	18.41	41075	182068	74.9	576	193	11	927	11	927	916	-	0	0	2842	0	0	194	0	0	0	0	0
OP_F032-KP_R041	Bacteria	C1-C6	18.43	41120	182023	74.9	576	193	11	926	11	926	915	-	0	0	2842	0	0	194	0	0	0	0	0
OP_F032-KP_R046	Bacteria	C1-C7	18.08	40347	182796	74.12	570	199	11	1064	11	1065	1053	-	0	0	2842	0	0	194	0	0	0	0	0
OP_F032-KP_R050	Bacteria	C1-C7	18.55	41388	181755	78.28	602	167	11	1064	11	1065	1054	-	0	0	2842	0	0	194	0	0	0	0	0
OP_F032-KP_R053	Bacteria	C1-C7	19.15	42726	180417	78.41	603	166	11	1078	11	1078	1067	-	0	0	2842	0	0	194	0	0	0	0	0
OP_F032-KP_R054	Bacteria	C1-C7	15.85	35369	187774	74.77	575	194	11	1080	11	1087	1069	-	0	0	2842	0	0	194	0	0	0	0	0
OP_F032-KP_R055	Bacteria	C1-C7	15.83	35325	187818	74.77	575	194	11	1081	11	1088	1070	-	0	0	2842	0	0	194	0	0	0	0	0
OP_F032-KP_R056	Bacteria	C1-C7	17.84	39809	183334	66.97	515	254	11	1115	11	1115	1105	-	0	0	2842	0	0	194	0	0	0	0	0
OP_F032-KP_R057	Bacteria	C1-C7	17.02	37980	185163	68.01	523	246	11	1115	11	1115	1105	-	0	0	2842	0	0	194	0	0	0	0	0
OP_F032-KP_R060	Bacteria	C1-C9	14.69	32780	190363	81.27	625	144	11	1407	11	1414	1396	-	0	0	2842	0	0	194	0	0	0	0	0
OP_F032-KP_R061	Bacteria	C1-C9	14.31	31928	191215	80.75	621	148	11	1407	11	1414	1396	-	0	0	2842	0	0	194	0	0	0	0	0
OP_F032-KP_R062	Bacteria	C1-C9	14.32	31961	191182	80.75	621	148	11	1407	11	1414	1396	-	0	0	2842	0	0	194	0	0	0	0	0
OP_F032-KP_R063	Bacteria	C1-C10	3.25	7243	215900	66.84	514	255	11	1506	11	1503	1495	-	0	0	2842	0	0	194	0	0	0	0	0
OP_F032-KP_R066	Bacteria	C1-C10	3.09	6906	216237	66.06	508	261	11	1507	11	1504	1496	-	0	0	2842	0	0	194	0	0	0	0	0
OP_F032-KP_R074	Bacteria	C1-C7	19.4	43292	179851	81.79	629	140	11	1115	11	1115	1104	-	0	0	2842	0	0	194	0	0	0	0	0
OP_F032-KP_R075	Bacteria	C1-C9	14.2	31683	191460	80.88	622	147	11	1406	11	1413	1395	-	0	0	2842	0	0	194	0	0	0	0	0
OP_F032-KP_R076	Bacteria	C1-C9	14.58	32528	190615	81.4	626	143	11	1406	11	1413	1395	-	0	0	2842	0	0	194	0	0	0	0	0
OP_F032-KP_R077	Bacteria	C1-C9	11.42	25483	197660	78.67	605	164	11	1407	11	1414	1396	-	0	0	2842	0	0	194	0	0	0	0	0
OP_F032-KP_R078	Bacteria	C1-C9	14.41	32157	190986	80.88	622	147	11	1406	11	1413	1395	-	0	0	2842	0	0	194	0	0	0	0	0
OP_F032-OP_R010	Bacteria	C1-C5	19.14	42702	180441	79.45	611	158	11	807	11	807	796	-	0	0	2842	0	0	194	0	0	0	0	0
OP_F032-OP_R014	Bacteria	C1-C5	19.14	42702	180441	79.45	611	158	11	807	11	807	796	-	0	0	2842	0	0	194	0	0	0	0	0
OP_F032-OP_R020	Bacteria	C1-C5	19.16	42757	180386	79.58	612	157	11	806	11	806	795	-	0	0	2842	0	0	194	0	0	0	0	0
OP_F032-OP_R026	Bacteria	C1-C7	16.84	37586	185557	65.54	504	265	11	1116	11	1115	1105	-	0	0	2842	0	0	194	0	0	0	0	0
OP_F032-OP_R029	Bacteria	C1-C8	18.83	42015	181128	74.25	571	198	11	1194	11	1195	1184	-	0	0	2842	0	0	194	0	0	0	0	0
OP_F032-OP_R030	Bacteria	C1-C7	19.32	43118	180025	80.88	622	147	11	1081	11	1081	1070	-	0	0	2842	0	0	194	0	0	0	0	0
OP_F032-OP_R032	Bacteria	C1-C5	19.18	42804	180339	79.45	611	158	11	803	11	803	792	-	0	0	2842	0	0	194	0	0	0	0	0
OP_F032-OP_R036	Bacteria	C1-C5	19.16	42747	180396	79.71	613	156	11	806	11	807	796	-	0	0	2842	0	0	194	0	0	0	0	0
OP_F032-OP_R048	Bacteria	C1-C5	19.12	42671	180472	79.45	611	158	11	807	11	807	796	-	0	0	2842	0	0	194	0	0	0	0	0
OP_F032-OP_R050	Bacteria	C1-C6	18.43	41134	182009	75.55	581	188	11	927	11	927	916	-	0	0	2842	0	0	194	0	0	0	0	0
OP_F032-OP_R052	Bacteria	C1-C6	18.46	41202	181941	75.55	581	188	11	927	11	927	916	-	0	0	2842	0	0	194	0	0	0	0	0
OP_F032-OP_R055	Bacteria	C1-C9	16.86	37615	185528	61.64	474	295	11	1389	11	1388	1378	-	0	0	2842	0	0	194	0	0	0	0	0
OP_F032-OP_R066	Bacteria	C1-C5	18.39	41037	182106	72.17	555	214	11	806	11	807	795	-	0	0	2842	0	0	194	0	0	0	0	0
OP_F032-OP_R067	Bacteria	C1-C6	18.48	41245	181898	75.55	581	188	11	927	11	927	916	-	0	0	2842	0	0	194	0	0	0	0	0
OP_F032-OP_R070	Bacteria	C1-C5	19.27	43004	180139	80.88	622	147	11	805	11	806	795	-	0	0	2842	0	0	194	0	0	0	0	0
OP_F032-OP_R073	Bacteria	C1-C6	19.33	43131	180012	81.4	626	143	11	894	11	895	883	-	0	0	2842	0	0	194	0	0	0	0	0
OP_F032-OP_R079	Bacteria	C1-C5	18.46	41182	181961	72.3	556	213	11	805	11	806	794	-	0	0	2842	0	0	194	0	0	0	0	0
OP_F032-OP_R086	Bacteria	C1-C5	18.32	40870	182273	71.26	548	221	11	802	11	803	791	-	0	0	2842	0	0	194	0	0	0	0	0
OP_F032-OP_R088	Bacteria	C1-C5	18.32	40874	182269	71	546	223	11	806	11	807	795	-	0	0	2842	0	0	194	0	0	0	0	0
OP_F032-OP_R089	Bacteria	C1-C6	14.11	31475	191668	71.91	553	216	11	928	11	935	917	-	0	0	2842	0	0	194	0	0	0	0	0
OP_F032-OP_R101	Bacteria	C1-C9	16.9	37720	185423	62.03	477	292	11	1388	11	1387	1377	-	0	0	2842	0	0	194	0	0	0	0	0
OP_F032-OP_R108	Bacteria	C1-C6	13.63	30420	192723	69.18	532	237	11	928	11	935	917	-	0	0	2842	0	0	194	0	0	0	0	0
OP_F032-OP_R119	Bacteria	C1-C5	19.08	42572	180571	78.02	600	169	11	807	11	807	796	-	0	0	2842	0	0	194	0	0	0	0	0
OP_F032-OP_R121	Bacteria	C1-C9	14.8	33016	190127	81.4	626	143	11	1406	11	1413	1395	-	0	0	2842	0	0	194	0	0	0	0	0
OP_F032-OP_R139	Bacteria	C1-C5	18.28	40783	182360	71	546	223	11	806	11	807	795	-	0	0	2842	0	0	194	0	0	0	0	0
OP_F032-OP_R143	Bacteria	C1-C6	13.65	30457	192686	69.18	532	237	11	927	11	934	916	-	0	0	2842	0	0	194	0	0	0	0	0
OP_F032-OP_UI005	Bacteria	C1-C6	13.64	30434	192709	69.18	532	237	11	928	11	935	917	-	0	0	2842	0	0	194	0	0	0	0	0
OP_F032-OP_UI009	Bacteria	C1-C7	17.92	39995	183148	72.17	555	214	11	1075	11	1075	1064	-	0	0	2842	0	0	194	0	0	0	0	0
OP_F033-KP_R060	Bacteria	C4-C9	30.96	69094	154049	80.36	618	151	561	1409	561	1414	847	-	0	0	2842	0	0	194	0	0	0	0	0
OP_F033-KP_R061	Bacteria	C4-C9	30.23	67448	155695	79.58	612	157	561	1409	561	1414	847	-	0	0	2842	0	0	194	0	0	0	0	0
OP_F033-KP_R062	Bacteria	C4-C9	30.27	67541	155602	79.58	612	157	561	1409	561	1414	847	-	0	0	2842	0	0	194	0	0	0	0	0
OP_F033-KP_R063	Bacteria	C4-C10	5.07	11310	211833	68.01	523	246	559	1506	568	1503	947	-	0	0	2842	0	0	194	0	0	0	0	0
OP_F033-KP_R066	Bacteria	C4-C10	4.82	10766	212377	66.97	515	254	559	1507	568	1504	948	-	0	0	2842	0	0	194	0	0	0	0	0
OP_F033-KP_R075	Bacteria	C4-C9	30.13	67226	155917	79.58	612	157	561	1408	561	1413	846	-	0	0	2842	0	0	194	0	0	0	0	0
OP_F033-KP_R076	Bacteria	C4-C9	30.87	68881	154262	80.36	618	151	561	1408	561	1413	846	-	0	0	2842	0	0	194	0	0	0	0	0
OP_F033-KP_R077	Bacteria	C4-C9	26.7	59574	163569	78.8	606	163	562	1409	568	1414	847	-	0	0	2842	0	0	194	0	0	0	0	0
OP_F033-KP_R078	Bacteria	C4-C9	30.4	67837	155306	79.58	612	157	561	1408	561	1413	846	-	0	0	2842	0	0	194	0	0	0	0	0
OP_F033-OP_R029	Bacteria	C4-C8	88.14	196670	26473	76.59	589	180	558	1192	568	1204	634	-	0	0	2842	0	0	194	0	0	0	0	0
OP_F033-OP_R055	Bacteria	C4-C9	79.22	176784	46359	60.34	464	305	559	1386	568	1394	827	-	0	0	2842	0	0	194	0	0	0	0	0
OP_F033-OP_R101	Bacteria	C4-C9	79.42	177228	45915	60.34	464	305	559	1385	568	1393	826	-	0	0	2842	0	0	194	0	0	0	0	0
OP_F033-OP_R121	Bacteria	C4-C9	31.15	69512	153631	80.36	618	151	561	1408	561	1413	846	-	0	0	2842	0	0	194	0	0	0	0	0
OP_F043-KP_R046	Bacteria	C3-C7	91.03	203128	20015	86.61	666	103	343	1062	348	1075	719	C3-C6	0.14	4	2838	2.06	4	190	314	994	314	994	680
OP_F043-KP_R050	Bacteria	C3-C7	93.43	208485	14658	91.29	702	67	343	1062	335	1075	719	C3-C6	26.5	753	2089	10.82	21	173	314	994	314	994	680
OP_F043-KP_R053	Bacteria	C3-C7	96.46	215235	7908	92.98	715	54	343	1076	335	1088	732	C3-V6	0.6	17	2825	3.61	7	187	337	1285	326	1018	948
OP_F043-KP_R054	Bacteria	C3-C7	87.82	195964	27179	89.99	692	77	344	1078	335	1090	734	C3-V6	0.6	17	2825	3.61	7	187	337	1287	326	1020	950
OP_F043-KP_R055	Bacteria	C3-C7	87.63	195538	27605	89.99	692	77	344	1079	335	1091	735	C3-V6	0.6	17	2825	3.61	7	187	337	1288	326	1021	951
OP_F043-KP_R056	Bacteria	C3-V7	91.66	204536	18607	78.54	604	165	343	1113	335	1125	770	-	0	0	2842	0	0	194	0	0	0	0	0
OP_F043-KP_R057	Bacteria	C3-V7	88.86	198279	24864	79.32	610	159	343	1113	348	1125	769	-	0	0	2842	0	0	194	0	0	0	0	0
[truncated: 1,110 more rows]
