# Supplementary material for: In-Silico Evaluation and Selection of the Best 16S rRNA Gene Primers for Use in Next-Generation Sequencing to Detect Oral Bacteria and Archaea.
Source: Research Square preprint supplement (doi:10.21203/rs.3.rs-516961/v1), 2021-05-24
Supplement: Supplementary file 5 [file dfd971bfb5531026b72284d3.xlsx]

## Sheet: Title
Additional table 35. Species non covered by the selected primer pairs for detecting bacteria and archaea (100-300 bp).
Additional table 36. Species non covered by the selected primer pairs for detecting bacteria and archaea (301-600 bp).
Additional table 37. Species non covered by the selected primer pairs for detecting bacteria and archaea (>600 bp).

## Sheet: Bact_Arch_100_300
							C-V3-4	C-V4-5	C-V4-5	C-V4-5	C-V4-5	C-V4-5	C-V4-5	C-V4-5	C-V4-5	C-V4-5	C-V4-5	C-V5-6
Domain	Phylum	Class	Order	Family	Genus	Species	OP_F114-KP_R002	KP_F020-KP_R032	KP_F020-KP_R031	KP_F020-KP_R035	KP_F020-OP_R020	KP_F020-OP_R070	KP_F020-OP_R014	KP_F020-OP_R036	KP_F020-OP_R048	KP_F020-KP_R038	KP_F020-OP_R010	OP_F066-OP_R073
Bacteria	Absconditabacteria (SR1)	Absconditabacteria (SR1) [C-1]	Absconditabacteria (SR1) [O-1]	Absconditabacteria (SR1) [F-1]	Absconditabacteria (SR1) [G-1]	bacterium_HMT345	Covered	Covered	Covered	Covered	Covered	Covered	Covered	Covered	Covered	Covered	Covered	Non covered
Bacteria	Absconditabacteria (SR1)	Absconditabacteria (SR1) [C-1]	Absconditabacteria (SR1) [O-1]	Absconditabacteria (SR1) [F-1]	Absconditabacteria (SR1) [G-1]	bacterium_HMT874	Covered	Covered	Covered	Covered	Covered	Covered	Covered	Covered	Covered	Covered	Covered	Non covered
Bacteria	Absconditabacteria (SR1)	Absconditabacteria (SR1) [C-1]	Absconditabacteria (SR1) [O-1]	Absconditabacteria (SR1) [F-1]	Absconditabacteria (SR1) [G-1]	bacterium_HMT875	Covered	Covered	Covered	Covered	Covered	Covered	Covered	Covered	Covered	Covered	Covered	Non covered
Bacteria	Actinobacteria	Actinobacteria	Propionibacteriales	Propionibacteriaceae	Acidipropionibacterium	acidifaciens	Non covered	Non covered	Non covered	Non covered	Non covered	Non covered	Non covered	Non covered	Non covered	Non covered	Non covered	Covered
Archaea	Euryarchaeota	Unknown	Unknown	Unknown	Aciduliprofundum	boonei T469	Covered	Covered	Covered	Covered	Covered	Covered	Covered	Covered	Covered	Covered	Covered	Non covered
Bacteria	Actinobacteria	Actinobacteria	Actinomycetales	Actinomycetaceae	Actinomyces	dentalis	Non covered	Covered	Covered	Covered	Covered	Covered	Covered	Covered	Covered	Covered	Covered	Covered
Bacteria	Actinobacteria	Actinobacteria	Actinomycetales	Actinomycetaceae	Actinomyces	israelii	Non covered	Covered	Covered	Covered	Covered	Covered	Covered	Covered	Covered	Covered	Covered	Covered
Bacteria	Actinobacteria	Actinobacteria	Actinomycetales	Actinomycetaceae	Actinomyces	johnsonii	Non covered	Covered	Covered	Covered	Covered	Covered	Covered	Covered	Covered	Covered	Covered	Covered
Bacteria	Actinobacteria	Actinobacteria	Actinomycetales	Actinomycetaceae	Actinomyces	oricola	Non covered	Non covered	Non covered	Non covered	Non covered	Non covered	Non covered	Non covered	Non covered	Non covered	Non covered	Covered
Bacteria	Actinobacteria	Actinobacteria	Actinomycetales	Actinomycetaceae	Actinomyces	sp.HMT414	Non covered	Covered	Covered	Covered	Covered	Covered	Covered	Covered	Covered	Covered	Covered	Covered
Bacteria	Actinobacteria	Actinobacteria	Actinomycetales	Actinomycetaceae	Actinomyces	sp.HMT448	Non covered	Covered	Covered	Covered	Covered	Covered	Covered	Covered	Covered	Covered	Covered	Covered
Bacteria	Actinobacteria	Actinobacteria	Actinomycetales	Actinomycetaceae	Actinomyces	sp.HMT525	Non covered	Covered	Covered	Covered	Covered	Covered	Covered	Covered	Covered	Covered	Covered	Covered
Bacteria	Actinobacteria	Actinobacteria	Actinomycetales	Actinomycetaceae	Actinomyces	sp.HMT896	Non covered	Covered	Covered	Covered	Covered	Covered	Covered	Covered	Covered	Covered	Covered	Covered
Bacteria	Actinobacteria	Actinobacteria	Actinomycetales	Actinomycetaceae	Actinomyces	sp.HMT897	Non covered	Covered	Covered	Covered	Covered	Covered	Covered	Covered	Covered	Covered	Covered	Covered
Bacteria	Firmicutes	Bacilli	Lactobacillales	Carnobacteriaceae	Alloiococcus	otitis	Covered	Covered	Covered	Covered	Covered	Covered	Covered	Covered	Covered	Covered	Covered	Non covered
Bacteria	Chloroflexi	Anaerolineae	Anaerolineales	Anaerolineaceae	Anaerolineae [G-1]	bacterium_HMT439	Non covered	Non covered	Non covered	Non covered	Non covered	Non covered	Non covered	Non covered	Non covered	Non covered	Non covered	Non covered
Bacteria	Bacteroidetes	Bacteroidetes [C-1]	Bacteroidetes [O-1]	Bacteroidetes [F-1]	Bacteroidetes [G-3]	bacterium_HMT899	Covered	Covered	Covered	Non covered	Non covered	Non covered	Non covered	Non covered	Non covered	Non covered	Non covered	Covered
Bacteria	Bacteroidetes	Bacteroidetes [C-1]	Bacteroidetes [O-1]	Bacteroidetes [F-1]	Bacteroidetes [G-4]	bacterium_HMT509	Non covered	Non covered	Non covered	Non covered	Non covered	Non covered	Non covered	Non covered	Non covered	Non covered	Non covered	Non covered
Archaea	Korarchaeota	Korarchaeia	Korarchaeales	Korarchaeaceae	Candidatus Korarchaeum	cryptofilum	Covered	Covered	Covered	Covered	Covered	Covered	Covered	Covered	Covered	Covered	Covered	Non covered
Archaea	Euryarchaeota	Thermoplasmata	Methanomassiliicoccales	Candidatus Methanomethylophilaceae	Candidatus Methanomethylophilus	alvus	Covered	Covered	Covered	Covered	Covered	Covered	Non covered	Non covered	Non covered	Non covered	Non covered	Non covered
Archaea	Euryarchaeota	Thermoplasmata	Methanomassiliicoccales	Candidatus Methanomethylophilaceae	Candidatus Methanomethylophilus	alvus Mx1201	Covered	Covered	Covered	Covered	Covered	Covered	Non covered	Non covered	Non covered	Non covered	Non covered	Non covered
Archaea	Euryarchaeota	Thermoplasmata	Methanomassiliicoccales	Methanomassiliicoccaceae	Candidatus Methanoplasma	termitum	Non covered	Covered	Covered	Covered	Covered	Covered	Covered	Covered	Covered	Covered	Covered	Non covered
Bacteria	Bacteroidetes	Flavobacteriia	Flavobacteriales	Flavobacteriaceae	Capnocytophaga	sp.HMT334	Non covered	Covered	Covered	Covered	Covered	Covered	Covered	Covered	Covered	Covered	Covered	Covered
Bacteria	Chlamydiae	Chlamydiia	Chlamydiales	Chlamydiaceae	Chlamydophila	pneumoniae	Non covered	Non covered	Non covered	Non covered	Non covered	Non covered	Non covered	Non covered	Non covered	Non covered	Non covered	Non covered
Bacteria	Actinobacteria	Actinobacteria	Propionibacteriales	Propionibacteriaceae	Cutibacterium	acnes	Covered	Non covered	Covered	Non covered	Non covered	Covered	Non covered	Non covered	Non covered	Non covered	Non covered	Covered
Bacteria	Actinobacteria	Actinobacteria	Propionibacteriales	Propionibacteriaceae	Cutibacterium	avidum	Non covered	Non covered	Non covered	Non covered	Non covered	Non covered	Non covered	Non covered	Non covered	Non covered	Non covered	Covered
Bacteria	Actinobacteria	Actinobacteria	Propionibacteriales	Propionibacteriaceae	Cutibacterium	granulosum	Non covered	Non covered	Non covered	Non covered	Non covered	Non covered	Non covered	Non covered	Non covered	Non covered	Non covered	Covered
Bacteria	Actinobacteria	Actinobacteria	Propionibacteriales	Propionibacteriaceae	Cutibacterium	sp.HMT193	Non covered	Non covered	Non covered	Non covered	Non covered	Non covered	Non covered	Non covered	Non covered	Non covered	Non covered	Covered
Bacteria	Proteobacteria	Deltaproteobacteria	Desulfovibrionales	Desulfomicrobiaceae	Desulfomicrobium	orale	Non covered	Covered	Covered	Covered	Covered	Covered	Covered	Covered	Covered	Covered	Covered	Covered
Bacteria	Proteobacteria	Deltaproteobacteria	Desulfovibrionales	Desulfovibrionaceae	Desulfovibrio	sp.HMT040	Non covered	Covered	Covered	Covered	Covered	Covered	Covered	Covered	Covered	Covered	Covered	Covered
Bacteria	Firmicutes	Bacilli	Lactobacillales	Carnobacteriaceae	Dolosigranulum	pigrum	Covered	Covered	Covered	Covered	Covered	Covered	Covered	Covered	Covered	Covered	Covered	Non covered
Bacteria	Firmicutes	Erysipelotrichia	Erysipelotrichales	Erysipelotrichaceae	Eggerthia	catenaformis	Non covered	Covered	Covered	Covered	Covered	Covered	Covered	Covered	Covered	Covered	Covered	Covered
Bacteria	Firmicutes	Erysipelotrichia	Erysipelotrichales	Erysipelotrichaceae	Erysipelotrichaceae [G-1]	bacterium_HMT904	Non covered	Covered	Covered	Covered	Covered	Covered	Covered	Covered	Covered	Covered	Covered	Covered
Archaea	Euryarchaeota	Thermoplasmata	Thermoplasmatales	Ferroplasmaceae	Ferroplasma	acidarmanus fer1	Covered	Covered	Covered	Covered	Covered	Covered	Covered	Covered	Covered	Covered	Covered	Non covered
Bacteria	Firmicutes	Bacilli	Lactobacillales	Lactobacillaceae	Lactobacillus	reuteri_clade_818	Non covered	Covered	Covered	Covered	Covered	Covered	Covered	Covered	Covered	Covered	Covered	Covered
Bacteria	Fusobacteria	Fusobacteriia	Fusobacteriales	Leptotrichiaceae	Leptotrichia	goodfellowii	Non covered	Covered	Covered	Covered	Covered	Covered	Covered	Covered	Covered	Covered	Covered	Covered
Bacteria	Fusobacteria	Fusobacteriia	Fusobacteriales	Leptotrichiaceae	Leptotrichia	sp.HMT219	Non covered	Covered	Covered	Covered	Covered	Covered	Covered	Covered	Covered	Covered	Covered	Covered
Bacteria	Fusobacteria	Fusobacteriia	Fusobacteriales	Leptotrichiaceae	Leptotrichia	sp.HMT221	Non covered	Covered	Covered	Covered	Covered	Covered	Covered	Covered	Covered	Covered	Covered	Covered
Archaea	Euryarchaeota	Methanomicrobia	Methanocellales	Methanocellaceae	Methanocella	arvoryzae MRE50	Covered	Covered	Covered	Covered	Covered	Covered	Covered	Covered	Covered	Covered	Covered	Non covered
Archaea	Euryarchaeota	Methanomicrobia	Methanocellales	Methanocellaceae	Methanocella	conradii HZ254	Covered	Covered	Covered	Covered	Covered	Covered	Covered	Covered	Covered	Covered	Covered	Non covered
Archaea	Euryarchaeota	Methanomicrobia	Methanocellales	Methanocellaceae	Methanocella	paludicola SANAE	Covered	Covered	Covered	Covered	Covered	Covered	Covered	Covered	Covered	Covered	Covered	Non covered
Archaea	Euryarchaeota	Thermoplasmata	Methanomassiliicoccales	Methanomassiliicoccaceae	Methanomassiliicoccus	intestinalis	Covered	Covered	Covered	Covered	Covered	Covered	Covered	Covered	Covered	Covered	Covered	Non covered
Archaea	Euryarchaeota	Thermoplasmata	Methanomassiliicoccales	Methanomassiliicoccaceae	Methanomassiliicoccus	intestinalis Issoire-Mx1	Covered	Covered	Covered	Covered	Covered	Covered	Covered	Covered	Covered	Covered	Covered	Non covered
Bacteria	Actinobacteria	Actinobacteria	Micrococcales	Microbacteriaceae	Microbacterium	flavescens	Covered	Non covered	Covered	Non covered	Non covered	Covered	Non covered	Non covered	Non covered	Non covered	Non covered	Covered
Bacteria	Actinobacteria	Actinobacteria	Micrococcales	Microbacteriaceae	Microbacterium	ginsengisoli	Covered	Non covered	Covered	Non covered	Non covered	Covered	Non covered	Non covered	Non covered	Non covered	Non covered	Covered
Bacteria	Firmicutes	Clostridia	Clostridiales	Peptostreptococcaceae [XI]	Mogibacterium	diversum	Non covered	Covered	Covered	Covered	Covered	Covered	Covered	Covered	Covered	Covered	Covered	Covered
Bacteria	Firmicutes	Clostridia	Clostridiales	Peptostreptococcaceae [XI]	Mogibacterium	neglectum	Non covered	Covered	Covered	Covered	Covered	Covered	Covered	Covered	Covered	Covered	Covered	Covered
Bacteria	Firmicutes	Clostridia	Clostridiales	Peptostreptococcaceae [XI]	Mogibacterium	pumilum	Non covered	Covered	Covered	Covered	Covered	Covered	Covered	Covered	Covered	Covered	Covered	Covered
Bacteria	Firmicutes	Clostridia	Clostridiales	Peptostreptococcaceae [XI]	Mogibacterium	timidum	Non covered	Covered	Covered	Covered	Covered	Covered	Covered	Covered	Covered	Covered	Covered	Covered
Bacteria	Firmicutes	Clostridia	Clostridiales	Peptostreptococcaceae [XI]	Mogibacterium	vescum	Non covered	Covered	Covered	Covered	Covered	Covered	Covered	Covered	Covered	Covered	Covered	Covered
Bacteria	Firmicutes	Mollicutes	Mycoplasmatales	Mycoplasmataceae	Mycoplasma	genitalium	Non covered	Non covered	Non covered	Non covered	Non covered	Non covered	Non covered	Non covered	Non covered	Non covered	Non covered	Non covered
Bacteria	Firmicutes	Mollicutes	Mycoplasmatales	Mycoplasmataceae	Mycoplasma	pneumoniae	Non covered	Non covered	Non covered	Non covered	Non covered	Non covered	Non covered	Non covered	Non covered	Non covered	Non covered	Non covered
Archaea	Nanoarchaeota	Unknown	Nanoarchaeales	Nanoarchaeaceae	Nanoarchaeum	equitans	Non covered	Non covered	Non covered	Non covered	Non covered	Non covered	Non covered	Non covered	Non covered	Non covered	Non covered	Non covered
Bacteria	Firmicutes	Clostridia	Clostridiales	Peptoniphilaceae	Peptoniphilus	indolicus	Non covered	Covered	Covered	Covered	Covered	Covered	Covered	Covered	Covered	Covered	Covered	Covered
Bacteria	Firmicutes	Clostridia	Clostridiales	Peptostreptococcaceae [XI]	Peptostreptococcaceae [XI][G-3]	bacterium_HMT495	Non covered	Covered	Covered	Covered	Covered	Covered	Covered	Covered	Covered	Covered	Covered	Covered
Archaea	Euryarchaeota	Thermoplasmata	Thermoplasmatales	Picrophilaceae	Picrophilus	torridus DSM 9790	Covered	Covered	Covered	Covered	Covered	Covered	Covered	Covered	Covered	Covered	Covered	Non covered
Bacteria	Actinobacteria	Actinobacteria	Propionibacteriales	Propionibacteriaceae	Propionibacteriaceae [G-1]	bacterium_HMT915	Non covered	Non covered	Non covered	Non covered	Non covered	Non covered	Non covered	Non covered	Non covered	Non covered	Non covered	Covered
Bacteria	Actinobacteria	Actinobacteria	Propionibacteriales	Propionibacteriaceae	Propionibacteriaceae [G-2]	bacterium_HMT192	Non covered	Non covered	Non covered	Non covered	Non covered	Non covered	Non covered	Non covered	Non covered	Non covered	Non covered	Covered
Bacteria	Actinobacteria	Actinobacteria	Propionibacteriales	Propionibacteriaceae	Pseudopropionibacterium	propionicum	Non covered	Non covered	Non covered	Non covered	Non covered	Non covered	Non covered	Non covered	Non covered	Non covered	Non covered	Covered
Bacteria	Actinobacteria	Actinobacteria	Propionibacteriales	Propionibacteriaceae	Pseudopropionibacterium	sp.HMT194	Non covered	Non covered	Non covered	Non covered	Non covered	Non covered	Non covered	Non covered	Non covered	Non covered	Non covered	Covered
Bacteria	Saccharibacteria (TM7)	Saccharibacteria (TM7) [C-1]	Saccharibacteria (TM7) [O-1]	Saccharibacteria (TM7) [F-1]	Saccharibacteria (TM7) [G-1]	bacterium_HMT346	Non covered	Non covered	Non covered	Non covered	Non covered	Non covered	Non covered	Non covered	Non covered	Non covered	Non covered	Covered
Bacteria	Saccharibacteria (TM7)	Saccharibacteria (TM7) [C-1]	Saccharibacteria (TM7) [O-1]	Saccharibacteria (TM7) [F-1]	Saccharibacteria (TM7) [G-1]	bacterium_HMT347	Non covered	Non covered	Non covered	Non covered	Non covered	Non covered	Non covered	Non covered	Non covered	Non covered	Non covered	Covered
Bacteria	Saccharibacteria (TM7)	Saccharibacteria (TM7) [C-1]	Saccharibacteria (TM7) [O-1]	Saccharibacteria (TM7) [F-1]	Saccharibacteria (TM7) [G-1]	bacterium_HMT348	Non covered	Non covered	Non covered	Non covered	Non covered	Non covered	Non covered	Non covered	Non covered	Non covered	Non covered	Covered
Bacteria	Saccharibacteria (TM7)	Saccharibacteria (TM7) [C-1]	Saccharibacteria (TM7) [O-1]	Saccharibacteria (TM7) [F-1]	Saccharibacteria (TM7) [G-1]	bacterium_HMT349	Non covered	Non covered	Non covered	Non covered	Non covered	Non covered	Non covered	Non covered	Non covered	Non covered	Non covered	Covered
Bacteria	Saccharibacteria (TM7)	Saccharibacteria (TM7) [C-1]	Saccharibacteria (TM7) [O-1]	Saccharibacteria (TM7) [F-1]	Saccharibacteria (TM7) [G-1]	bacterium_HMT352	Non covered	Non covered	Non covered	Non covered	Non covered	Non covered	Non covered	Non covered	Non covered	Non covered	Non covered	Covered
Bacteria	Saccharibacteria (TM7)	Saccharibacteria (TM7) [C-1]	Saccharibacteria (TM7) [O-1]	Saccharibacteria (TM7) [F-1]	Saccharibacteria (TM7) [G-1]	bacterium_HMT488	Non covered	Non covered	Non covered	Non covered	Non covered	Non covered	Non covered	Non covered	Non covered	Non covered	Non covered	Covered
Bacteria	Saccharibacteria (TM7)	Saccharibacteria (TM7) [C-1]	Saccharibacteria (TM7) [O-1]	Saccharibacteria (TM7) [F-1]	Saccharibacteria (TM7) [G-1]	bacterium_HMT869	Non covered	Non covered	Non covered	Non covered	Non covered	Non covered	Non covered	Non covered	Non covered	Non covered	Non covered	Covered
Bacteria	Saccharibacteria (TM7)	Saccharibacteria (TM7) [C-1]	Saccharibacteria (TM7) [O-1]	Saccharibacteria (TM7) [F-1]	Saccharibacteria (TM7) [G-1]	bacterium_HMT952	Non covered	Non covered	Non covered	Non covered	Non covered	Non covered	Non covered	Non covered	Non covered	Non covered	Non covered	Covered
Bacteria	Saccharibacteria (TM7)	Saccharibacteria (TM7) [C-1]	Saccharibacteria (TM7) [O-1]	Saccharibacteria (TM7) [F-1]	Saccharibacteria (TM7) [G-2]	bacterium_HMT350	Non covered	Non covered	Non covered	Non covered	Non covered	Non covered	Non covered	Non covered	Non covered	Non covered	Non covered	Covered
Bacteria	Saccharibacteria (TM7)	Saccharibacteria (TM7) [C-1]	Saccharibacteria (TM7) [O-1]	Saccharibacteria (TM7) [F-1]	Saccharibacteria (TM7) [G-3]	bacterium_HMT351	Non covered	Non covered	Non covered	Non covered	Non covered	Non covered	Non covered	Non covered	Non covered	Non covered	Non covered	Covered
Bacteria	Saccharibacteria (TM7)	Saccharibacteria (TM7) [C-1]	Saccharibacteria (TM7) [O-1]	Saccharibacteria (TM7) [F-1]	Saccharibacteria (TM7) [G-4]	bacterium_HMT355	Non covered	Non covered	Non covered	Non covered	Non covered	Non covered	Non covered	Non covered	Non covered	Non covered	Non covered	Covered
Bacteria	Saccharibacteria (TM7)	Saccharibacteria (TM7) [C-1]	Saccharibacteria (TM7) [O-1]	Saccharibacteria (TM7) [F-2]	Saccharibacteria (TM7) [G-5]	bacterium_HMT356	Non covered	Non covered	Non covered	Non covered	Non covered	Non covered	Non covered	Non covered	Non covered	Non covered	Non covered	Covered
Bacteria	Saccharibacteria (TM7)	Saccharibacteria (TM7) [C-1]	Saccharibacteria (TM7) [O-1]	Saccharibacteria (TM7) [F-1]	Saccharibacteria (TM7) [G-6]	bacterium_HMT870	Non covered	Non covered	Non covered	Non covered	Non covered	Non covered	Non covered	Non covered	Non covered	Non covered	Non covered	Covered
Bacteria	Saccharibacteria (TM7)	Saccharibacteria (TM7) [C-1]	Saccharibacteria (TM7) [O-1]	Saccharibacteria (TM7) [F-1]	Saccharibacteria (TM7) [G-7]	bacterium_HMT954	Non covered	Non covered	Non covered	Non covered	Non covered	Non covered	Non covered	Non covered	Non covered	Non covered	Non covered	Covered
Bacteria	Saccharibacteria (TM7)	Saccharibacteria (TM7) [C-1]	Saccharibacteria (TM7) [O-1]	Saccharibacteria (TM7) [F-1]	Saccharibacteria (TM7) [G-8]	bacterium_HMT955	Non covered	Non covered	Non covered	Non covered	Non covered	Non covered	Non covered	Non covered	Non covered	Non covered	Non covered	Covered
Bacteria	Firmicutes	Clostridia	Clostridiales	Syntrophomonadaceae [VIII]	Syntrophomonadaceae [VIII][G-1]	bacterium_HMT435	Covered	Covered	Covered	Covered	Covered	Covered	Non covered	Non covered	Non covered	Non covered	Non covered	Covered
Archaea	Crenarchaeota	Thermoprotei	Thermoproteales	Thermofilaceae	Thermofilum	pendens Hrk 5	Covered	Covered	Non covered	Non covered	Non covered	Non covered	Covered	Covered	Covered	Non covered	Non covered	Covered
Archaea	Euryarchaeota	Thermoplasmata	Thermoplasmatales	Thermoplasmataceae	Thermoplasma	volcanium GSS1	Covered	Covered	Covered	Covered	Covered	Covered	Covered	Covered	Covered	Covered	Covered	Non covered
Bacteria	Spirochaetes	Spirochaetia	Spirochaetales	Spirochaetaceae	Treponema	lecithinolyticum	Non covered	Covered	Covered	Covered	Covered	Covered	Covered	Covered	Covered	Covered	Covered	Covered
Bacteria	Spirochaetes	Spirochaetia	Spirochaetales	Spirochaetaceae	Treponema	maltophilum	Non covered	Covered	Covered	Covered	Covered	Covered	Covered	Covered	Covered	Covered	Covered	Covered
Bacteria	Spirochaetes	Spirochaetia	Spirochaetales	Spirochaetaceae	Treponema	sp.HMT258	Non covered	Non covered	Non covered	Non covered	Non covered	Non covered	Non covered	Non covered	Non covered	Non covered	Non covered	Non covered
Bacteria	Spirochaetes	Spirochaetia	Spirochaetales	Spirochaetaceae	Treponema	sp.HMT260	Non covered	Covered	Covered	Covered	Covered	Covered	Covered	Covered	Covered	Covered	Covered	Covered
Bacteria	Spirochaetes	Spirochaetia	Spirochaetales	Spirochaetaceae	Treponema	sp.HMT264	Covered	Covered	Covered	Covered	Covered	Covered	Covered	Covered	Covered	Covered	Covered	Non covered
Bacteria	Spirochaetes	Spirochaetia	Spirochaetales	Spirochaetaceae	Treponema	sp.HMT270	Covered	Non covered	Non covered	Non covered	Non covered	Non covered	Non covered	Non covered	Non covered	Non covered	Non covered	Non covered
Bacteria	Spirochaetes	Spirochaetia	Spirochaetales	Spirochaetaceae	Treponema	sp.HMT490	Non covered	Covered	Covered	Covered	Covered	Covered	Covered	Covered	Covered	Covered	Covered	Covered

## Sheet: Bact_Arch_301_600
							C-V3-5	C-V3-5	C-V3-6	C-V4-6
Domain	Phylum	Class	Order	Family	Genus	Species	OP_F114-KP_R031	OP_F114-OP_R070	OP_F114-OP_R073	KP_F020-OP_R073
Bacteria	Absconditabacteria (SR1)	Absconditabacteria (SR1) [C-1]	Absconditabacteria (SR1) [O-1]	Absconditabacteria (SR1) [F-1]	Absconditabacteria (SR1) [G-1]	bacterium_HMT345	Covered	Covered	Non covered	Non covered
Bacteria	Absconditabacteria (SR1)	Absconditabacteria (SR1) [C-1]	Absconditabacteria (SR1) [O-1]	Absconditabacteria (SR1) [F-1]	Absconditabacteria (SR1) [G-1]	bacterium_HMT874	Covered	Covered	Non covered	Non covered
Bacteria	Absconditabacteria (SR1)	Absconditabacteria (SR1) [C-1]	Absconditabacteria (SR1) [O-1]	Absconditabacteria (SR1) [F-1]	Absconditabacteria (SR1) [G-1]	bacterium_HMT875	Covered	Covered	Non covered	Non covered
Bacteria	Actinobacteria	Actinobacteria	Propionibacteriales	Propionibacteriaceae	Acidipropionibacterium	acidifaciens	Covered	Covered	Covered	Non covered
Bacteria	Actinobacteria	Actinobacteria	Actinomycetales	Actinomycetaceae	Actinomyces	oricola	Covered	Covered	Covered	Non covered
Bacteria	Actinobacteria	Actinobacteria	Actinomycetales	Actinomycetaceae	Actinomyces	sp.HMT414	Non covered	Non covered	Non covered	Covered
Bacteria	Actinobacteria	Actinobacteria	Actinomycetales	Actinomycetaceae	Actinomyces	sp.HMT448	Non covered	Non covered	Non covered	Covered
Bacteria	Actinobacteria	Actinobacteria	Actinomycetales	Actinomycetaceae	Actinomyces	sp.HMT525	Non covered	Non covered	Non covered	Covered
Bacteria	Actinobacteria	Actinobacteria	Actinomycetales	Actinomycetaceae	Actinomyces	israelii	Non covered	Non covered	Non covered	Covered
Bacteria	Actinobacteria	Actinobacteria	Actinomycetales	Actinomycetaceae	Actinomyces	johnsonii	Non covered	Non covered	Non covered	Covered
Bacteria	Actinobacteria	Actinobacteria	Actinomycetales	Actinomycetaceae	Actinomyces	dentalis	Non covered	Non covered	Non covered	Covered
Bacteria	Actinobacteria	Actinobacteria	Actinomycetales	Actinomycetaceae	Actinomyces	sp.HMT896	Non covered	Non covered	Non covered	Covered
Bacteria	Actinobacteria	Actinobacteria	Actinomycetales	Actinomycetaceae	Actinomyces	sp.HMT897	Non covered	Non covered	Non covered	Covered
Bacteria	Firmicutes	Bacilli	Lactobacillales	Carnobacteriaceae	Alloiococcus	otitis	Covered	Covered	Non covered	Non covered
Bacteria	Chloroflexi	Anaerolineae	Anaerolineales	Anaerolineaceae	Anaerolineae [G-1]	bacterium_HMT439	Non covered	Non covered	Non covered	Covered
Bacteria	Bacteroidetes	Bacteroidetes [C-1]	Bacteroidetes [O-1]	Bacteroidetes [F-1]	Bacteroidetes [G-3]	bacterium_HMT899	Covered	Non covered	Covered	Covered
Bacteria	Bacteroidetes	Bacteroidetes [C-1]	Bacteroidetes [O-1]	Bacteroidetes [F-1]	Bacteroidetes [G-4]	bacterium_HMT509	Non covered	Non covered	Non covered	Covered
Bacteria	Bacteroidetes	Flavobacteriia	Flavobacteriales	Flavobacteriaceae	Capnocytophaga	sp.HMT334	Non covered	Non covered	Non covered	Covered
Bacteria	Chlamydiae	Chlamydiia	Chlamydiales	Chlamydiaceae	Chlamydophila	pneumoniae	Covered	Covered	Non covered	Non covered
Bacteria	Actinobacteria	Actinobacteria	Propionibacteriales	Propionibacteriaceae	Cutibacterium	granulosum	Covered	Covered	Covered	Non covered
Bacteria	Actinobacteria	Actinobacteria	Propionibacteriales	Propionibacteriaceae	Cutibacterium	sp.HMT193	Covered	Covered	Covered	Non covered
Bacteria	Actinobacteria	Actinobacteria	Propionibacteriales	Propionibacteriaceae	Cutibacterium	avidum	Covered	Covered	Covered	Non covered
Bacteria	Proteobacteria	Deltaproteobacteria	Desulfovibrionales	Desulfomicrobiaceae	Desulfomicrobium	orale	Non covered	Non covered	Non covered	Covered
Bacteria	Proteobacteria	Deltaproteobacteria	Desulfovibrionales	Desulfovibrionaceae	Desulfovibrio	sp.HMT040	Non covered	Non covered	Non covered	Covered
Bacteria	Firmicutes	Bacilli	Lactobacillales	Carnobacteriaceae	Dolosigranulum	pigrum	Covered	Covered	Non covered	Non covered
Bacteria	Firmicutes	Erysipelotrichia	Erysipelotrichales	Erysipelotrichaceae	Eggerthia	catenaformis	Non covered	Non covered	Non covered	Covered
Bacteria	Firmicutes	Erysipelotrichia	Erysipelotrichales	Erysipelotrichaceae	Erysipelotrichaceae [G-1]	bacterium_HMT904	Non covered	Non covered	Non covered	Covered
Bacteria	Firmicutes	Bacilli	Lactobacillales	Lactobacillaceae	Lactobacillus	reuteri_clade_818	Non covered	Non covered	Non covered	Covered
Bacteria	Fusobacteria	Fusobacteriia	Fusobacteriales	Leptotrichiaceae	Leptotrichia	sp.HMT219	Non covered	Non covered	Non covered	Covered
Bacteria	Fusobacteria	Fusobacteriia	Fusobacteriales	Leptotrichiaceae	Leptotrichia	sp.HMT221	Non covered	Non covered	Non covered	Covered
Bacteria	Fusobacteria	Fusobacteriia	Fusobacteriales	Leptotrichiaceae	Leptotrichia	goodfellowii	Non covered	Non covered	Non covered	Covered
Bacteria	Firmicutes	Clostridia	Clostridiales	Peptostreptococcaceae [XI]	Mogibacterium	vescum	Non covered	Non covered	Non covered	Covered
Bacteria	Firmicutes	Clostridia	Clostridiales	Peptostreptococcaceae [XI]	Mogibacterium	timidum	Non covered	Non covered	Non covered	Covered
Archaea	Euryarchaeota	Thermoplasmata	Thermoplasmatales	Thermoplasmataceae	Thermoplasma	volcanium GSS1	Covered	Covered	Non covered	Non covered
Archaea	Euryarchaeota	Thermoplasmata	Thermoplasmatales	Picrophilaceae	Picrophilus	torridus DSM 9790	Covered	Covered	Non covered	Non covered
Archaea	Euryarchaeota	Methanomicrobia	Methanocellales	Methanocellaceae	Methanocella	arvoryzae MRE50	Covered	Covered	Non covered	Non covered
Archaea	Euryarchaeota	Methanomicrobia	Methanocellales	Methanocellaceae	Methanocella	paludicola SANAE	Covered	Covered	Non covered	Non covered
Archaea	Euryarchaeota	Unknown	Unknown	Unknown	Aciduliprofundum	boonei T469	Covered	Covered	Non covered	Non covered
Archaea	Euryarchaeota	Methanomicrobia	Methanocellales	Methanocellaceae	Methanocella	conradii HZ254	Covered	Covered	Non covered	Non covered
Archaea	Euryarchaeota	Thermoplasmata	Methanomassiliicoccales	Methanomassiliicoccaceae	Methanomassiliicoccus	intestinalis Issoire-Mx1	Covered	Covered	Non covered	Non covered
Archaea	Euryarchaeota	Thermoplasmata	Thermoplasmatales	Ferroplasmaceae	Ferroplasma	acidarmanus fer1	Covered	Covered	Non covered	Non covered
Archaea	Euryarchaeota	Thermoplasmata	Methanomassiliicoccales	Methanomassiliicoccaceae	Candidatus Methanoplasma	termitum	Non covered	Non covered	Non covered	Non covered
Archaea	Euryarchaeota	Thermoplasmata	Methanomassiliicoccales	Methanomassiliicoccaceae	Methanomassiliicoccus	intestinalis	Covered	Covered	Non covered	Non covered
Archaea	Euryarchaeota	Thermoplasmata	Methanomassiliicoccales	Candidatus Methanomethylophilaceae	Candidatus Methanomethylophilus	alvus Mx1201	Covered	Covered	Non covered	Non covered
Archaea	Euryarchaeota	Thermoplasmata	Methanomassiliicoccales	Candidatus Methanomethylophilaceae	Candidatus Methanomethylophilus	alvus	Covered	Covered	Non covered	Non covered
Archaea	Nanoarchaeota	Unknown	Nanoarchaeales	Nanoarchaeaceae	Nanoarchaeum	equitans	Non covered	Non covered	Covered	Non covered
Archaea	Korarchaeota	Korarchaeia	Korarchaeales	Korarchaeaceae	Candidatus Korarchaeum	cryptofilum	Covered	Covered	Non covered	Non covered
Bacteria	Firmicutes	Clostridia	Clostridiales	Peptostreptococcaceae [XI]	Mogibacterium	diversum	Non covered	Non covered	Non covered	Covered
Bacteria	Firmicutes	Clostridia	Clostridiales	Peptostreptococcaceae [XI]	Mogibacterium	neglectum	Non covered	Non covered	Non covered	Covered
Bacteria	Firmicutes	Clostridia	Clostridiales	Peptostreptococcaceae [XI]	Mogibacterium	pumilum	Non covered	Non covered	Non covered	Covered
Bacteria	Firmicutes	Mollicutes	Mycoplasmatales	Mycoplasmataceae	Mycoplasma	genitalium	Covered	Covered	Non covered	Non covered
Bacteria	Firmicutes	Mollicutes	Mycoplasmatales	Mycoplasmataceae	Mycoplasma	pneumoniae	Covered	Covered	Non covered	Non covered
Bacteria	Firmicutes	Clostridia	Clostridiales	Peptoniphilaceae	Peptoniphilus	indolicus	Non covered	Non covered	Non covered	Covered
Bacteria	Firmicutes	Clostridia	Clostridiales	Peptostreptococcaceae [XI]	Peptostreptococcaceae [XI][G-3]	bacterium_HMT495	Non covered	Non covered	Non covered	Covered
Bacteria	Actinobacteria	Actinobacteria	Propionibacteriales	Propionibacteriaceae	Propionibacteriaceae [G-1]	bacterium_HMT915	Covered	Covered	Covered	Non covered
Bacteria	Actinobacteria	Actinobacteria	Propionibacteriales	Propionibacteriaceae	Propionibacteriaceae [G-2]	bacterium_HMT192	Covered	Covered	Covered	Non covered
Bacteria	Actinobacteria	Actinobacteria	Propionibacteriales	Propionibacteriaceae	Pseudopropionibacterium	sp.HMT194	Covered	Covered	Covered	Non covered
Bacteria	Actinobacteria	Actinobacteria	Propionibacteriales	Propionibacteriaceae	Pseudopropionibacterium	propionicum	Covered	Covered	Covered	Non covered
Bacteria	Saccharibacteria (TM7)	Saccharibacteria (TM7) [C-1]	Saccharibacteria (TM7) [O-1]	Saccharibacteria (TM7) [F-1]	Saccharibacteria (TM7) [G-1]	bacterium_HMT346	Covered	Covered	Covered	Non covered
Bacteria	Saccharibacteria (TM7)	Saccharibacteria (TM7) [C-1]	Saccharibacteria (TM7) [O-1]	Saccharibacteria (TM7) [F-1]	Saccharibacteria (TM7) [G-1]	bacterium_HMT347	Covered	Covered	Covered	Non covered
Bacteria	Saccharibacteria (TM7)	Saccharibacteria (TM7) [C-1]	Saccharibacteria (TM7) [O-1]	Saccharibacteria (TM7) [F-1]	Saccharibacteria (TM7) [G-1]	bacterium_HMT348	Non covered	Non covered	Covered	Non covered
Bacteria	Saccharibacteria (TM7)	Saccharibacteria (TM7) [C-1]	Saccharibacteria (TM7) [O-1]	Saccharibacteria (TM7) [F-1]	Saccharibacteria (TM7) [G-1]	bacterium_HMT349	Covered	Covered	Covered	Non covered
Bacteria	Saccharibacteria (TM7)	Saccharibacteria (TM7) [C-1]	Saccharibacteria (TM7) [O-1]	Saccharibacteria (TM7) [F-1]	Saccharibacteria (TM7) [G-1]	bacterium_HMT352	Covered	Covered	Covered	Non covered
Bacteria	Saccharibacteria (TM7)	Saccharibacteria (TM7) [C-1]	Saccharibacteria (TM7) [O-1]	Saccharibacteria (TM7) [F-1]	Saccharibacteria (TM7) [G-1]	bacterium_HMT488	Covered	Covered	Covered	Non covered
Bacteria	Saccharibacteria (TM7)	Saccharibacteria (TM7) [C-1]	Saccharibacteria (TM7) [O-1]	Saccharibacteria (TM7) [F-1]	Saccharibacteria (TM7) [G-1]	bacterium_HMT869	Covered	Covered	Covered	Non covered
Bacteria	Saccharibacteria (TM7)	Saccharibacteria (TM7) [C-1]	Saccharibacteria (TM7) [O-1]	Saccharibacteria (TM7) [F-1]	Saccharibacteria (TM7) [G-1]	bacterium_HMT952	Covered	Covered	Covered	Non covered
Bacteria	Saccharibacteria (TM7)	Saccharibacteria (TM7) [C-1]	Saccharibacteria (TM7) [O-1]	Saccharibacteria (TM7) [F-1]	Saccharibacteria (TM7) [G-2]	bacterium_HMT350	Covered	Covered	Covered	Non covered
Bacteria	Saccharibacteria (TM7)	Saccharibacteria (TM7) [C-1]	Saccharibacteria (TM7) [O-1]	Saccharibacteria (TM7) [F-1]	Saccharibacteria (TM7) [G-3]	bacterium_HMT351	Covered	Covered	Covered	Non covered
Bacteria	Saccharibacteria (TM7)	Saccharibacteria (TM7) [C-1]	Saccharibacteria (TM7) [O-1]	Saccharibacteria (TM7) [F-1]	Saccharibacteria (TM7) [G-4]	bacterium_HMT355	Covered	Covered	Covered	Non covered
Bacteria	Saccharibacteria (TM7)	Saccharibacteria (TM7) [C-1]	Saccharibacteria (TM7) [O-1]	Saccharibacteria (TM7) [F-2]	Saccharibacteria (TM7) [G-5]	bacterium_HMT356	Covered	Covered	Covered	Non covered
Bacteria	Saccharibacteria (TM7)	Saccharibacteria (TM7) [C-1]	Saccharibacteria (TM7) [O-1]	Saccharibacteria (TM7) [F-1]	Saccharibacteria (TM7) [G-6]	bacterium_HMT870	Covered	Covered	Covered	Non covered
Bacteria	Saccharibacteria (TM7)	Saccharibacteria (TM7) [C-1]	Saccharibacteria (TM7) [O-1]	Saccharibacteria (TM7) [F-1]	Saccharibacteria (TM7) [G-7]	bacterium_HMT954	Covered	Covered	Covered	Non covered
Bacteria	Saccharibacteria (TM7)	Saccharibacteria (TM7) [C-1]	Saccharibacteria (TM7) [O-1]	Saccharibacteria (TM7) [F-1]	Saccharibacteria (TM7) [G-8]	bacterium_HMT955	Covered	Covered	Covered	Non covered
Bacteria	Spirochaetes	Spirochaetia	Spirochaetales	Spirochaetaceae	Treponema	sp.HMT264	Covered	Covered	Non covered	Non covered
Bacteria	Spirochaetes	Spirochaetia	Spirochaetales	Spirochaetaceae	Treponema	sp.HMT258	Non covered	Non covered	Non covered	Covered
Bacteria	Spirochaetes	Spirochaetia	Spirochaetales	Spirochaetaceae	Treponema	sp.HMT260	Non covered	Non covered	Non covered	Covered
Bacteria	Spirochaetes	Spirochaetia	Spirochaetales	Spirochaetaceae	Treponema	sp.HMT270	Non covered	Non covered	Covered	Covered
Bacteria	Spirochaetes	Spirochaetia	Spirochaetales	Spirochaetaceae	Treponema	sp.HMT490	Non covered	Non covered	Non covered	Covered
Bacteria	Spirochaetes	Spirochaetia	Spirochaetales	Spirochaetaceae	Treponema	lecithinolyticum	Non covered	Non covered	Non covered	Covered
Archaea	Crenarchaeota	Thermoprotei	Thermoproteales	Thermofilaceae	Thermofilum	pendens Hrk 5	Non covered	Non covered	Covered	Covered
Bacteria	Spirochaetes	Spirochaetia	Spirochaetales	Spirochaetaceae	Treponema	maltophilum	Non covered	Non covered	Non covered	Covered

## Sheet: Bact_Arch_more_600
							C-V3-9	C-V3-9	C-V3-9	C-V4-9	C-V5-9	C-V5-9	C-V5-9
Domain	Phylum	Class	Order	Family	Genus	Species	OP_F114-KP_R060	OP_F114-KP_R076	OP_F114-OP_R121	KP_F020-OP_R121	OP_F066-KP_R060	OP_F066-KP_R076	OP_F066-OP_R121
Archaea	Crenarchaeota	Thermoprotei	Acidilobales	Acidilobaceae	Acidilobus	saccharovorans 345-15	Non covered	Non covered	Non covered	Non covered	Non covered	Non covered	Non covered
Bacteria	Actinobacteria	Actinobacteria	Propionibacteriales	Propionibacteriaceae	Acidipropionibacterium	acidifaciens	Covered	Covered	Covered	Non covered	Covered	Covered	Covered
Bacteria	Actinobacteria	Actinobacteria	Actinomycetales	Actinomycetaceae	Actinomyces	oricola	Covered	Covered	Covered	Non covered	Covered	Covered	Covered
Bacteria	Actinobacteria	Actinobacteria	Actinomycetales	Actinomycetaceae	Actinomyces	sp.HMT414	Non covered	Non covered	Non covered	Covered	Covered	Covered	Covered
Bacteria	Actinobacteria	Actinobacteria	Actinomycetales	Actinomycetaceae	Actinomyces	sp.HMT448	Non covered	Non covered	Non covered	Covered	Covered	Covered	Covered
Bacteria	Actinobacteria	Actinobacteria	Actinomycetales	Actinomycetaceae	Actinomyces	sp.HMT525	Non covered	Non covered	Non covered	Covered	Covered	Covered	Covered
Bacteria	Actinobacteria	Actinobacteria	Actinomycetales	Actinomycetaceae	Actinomyces	israelii	Non covered	Non covered	Non covered	Covered	Covered	Covered	Covered
Bacteria	Actinobacteria	Actinobacteria	Actinomycetales	Actinomycetaceae	Actinomyces	johnsonii	Non covered	Non covered	Non covered	Covered	Covered	Covered	Covered
Bacteria	Actinobacteria	Actinobacteria	Actinomycetales	Actinomycetaceae	Actinomyces	dentalis	Non covered	Non covered	Non covered	Covered	Covered	Covered	Covered
Bacteria	Actinobacteria	Actinobacteria	Actinomycetales	Actinomycetaceae	Actinomyces	sp.HMT896	Non covered	Non covered	Non covered	Covered	Covered	Covered	Covered
Bacteria	Actinobacteria	Actinobacteria	Actinomycetales	Actinomycetaceae	Actinomyces	sp.HMT897	Non covered	Non covered	Non covered	Covered	Covered	Covered	Covered
Archaea	Crenarchaeota	Thermoprotei	Desulfurococcales	Desulfurococcaceae	Aeropyrum	pernix	Non covered	Non covered	Non covered	Non covered	Non covered	Non covered	Non covered
Bacteria	Proteobacteria	Gammaproteobacteria	Pasteurellales	Pasteurellaceae	Aggregatibacter	sp.HMT949	Non covered	Non covered	Non covered	Non covered	Non covered	Non covered	Non covered
Bacteria	Chloroflexi	Anaerolineae	Anaerolineales	Anaerolineaceae	Anaerolineae [G-1]	bacterium_HMT439	Non covered	Non covered	Non covered	Covered	Non covered	Non covered	Non covered
Bacteria	Bacteroidetes	Bacteroidetes [C-1]	Bacteroidetes [O-1]	Bacteroidetes [F-1]	Bacteroidetes [G-3]	bacterium_HMT281	Non covered	Non covered	Non covered	Non covered	Non covered	Non covered	Non covered
Bacteria	Bacteroidetes	Bacteroidetes [C-1]	Bacteroidetes [O-1]	Bacteroidetes [F-1]	Bacteroidetes [G-4]	bacterium_HMT509	Non covered	Non covered	Non covered	Covered	Non covered	Non covered	Non covered
Bacteria	Bacteroidetes	Bacteroidetes [C-1]	Bacteroidetes [O-1]	Bacteroidetes [F-1]	Bacteroidetes [G-5]	bacterium_HMT505	Non covered	Non covered	Non covered	Non covered	Non covered	Non covered	Non covered
Bacteria	Bacteroidetes	Flavobacteriia	Flavobacteriales	Flavobacteriaceae	Bergeyella	sp.HMT319	Non covered	Non covered	Non covered	Non covered	Non covered	Non covered	Non covered
Bacteria	Proteobacteria	Alphaproteobacteria	Caulobacterales	Caulobacteraceae	Brevundimonas	diminuta	Non covered	Non covered	Non covered	Non covered	Non covered	Non covered	Non covered
Archaea	Crenarchaeota	Thermoprotei	Acidilobales	Caldisphaeraceae	Caldisphaera	lagunensis DSM 15908	Non covered	Non covered	Non covered	Non covered	Non covered	Non covered	Non covered
Archaea	Euryarchaeota	Thermoplasmata	Methanomassiliicoccales	Methanomassiliicoccaceae	Candidatus Methanoplasma	termitum	Non covered	Non covered	Non covered	Covered	Covered	Covered	Covered
Bacteria	Bacteroidetes	Flavobacteriia	Flavobacteriales	Flavobacteriaceae	Capnocytophaga	sp.HMT334	Non covered	Non covered	Non covered	Non covered	Non covered	Non covered	Non covered
Bacteria	Bacteroidetes	Flavobacteriia	Flavobacteriales	Flavobacteriaceae	Capnocytophaga	sp.HMT878	Non covered	Non covered	Non covered	Non covered	Non covered	Non covered	Non covered
Bacteria	Firmicutes	Clostridia	Clostridiales	Lachnospiraceae [XIV]	Catonella	sp.HMT164	Non covered	Non covered	Non covered	Non covered	Non covered	Non covered	Non covered
Bacteria	Firmicutes	Negativicutes	Selenomonadales	Selenomonadaceae	Centipeda	periodontii	Non covered	Non covered	Non covered	Non covered	Non covered	Non covered	Non covered
Bacteria	Chlamydiae	Chlamydiia	Chlamydiales	Chlamydiaceae	Chlamydophila	pneumoniae	Covered	Covered	Covered	Non covered	Covered	Covered	Covered
Bacteria	Firmicutes	Clostridia	Clostridiales	Clostridiales [F-3]	Clostridiales [F-3][G-1]	bacterium_HMT876	Non covered	Non covered	Non covered	Non covered	Non covered	Non covered	Non covered
Bacteria	Actinobacteria	Actinobacteria	Propionibacteriales	Propionibacteriaceae	Cutibacterium	granulosum	Covered	Covered	Covered	Non covered	Covered	Covered	Covered
Bacteria	Actinobacteria	Actinobacteria	Propionibacteriales	Propionibacteriaceae	Cutibacterium	sp.HMT193	Covered	Covered	Covered	Non covered	Covered	Covered	Covered
Bacteria	Actinobacteria	Actinobacteria	Propionibacteriales	Propionibacteriaceae	Cutibacterium	avidum	Covered	Covered	Covered	Non covered	Covered	Covered	Covered
Bacteria	Proteobacteria	Deltaproteobacteria	Desulfovibrionales	Desulfomicrobiaceae	Desulfomicrobium	orale	Non covered	Non covered	Non covered	Covered	Covered	Covered	Covered
Bacteria	Proteobacteria	Deltaproteobacteria	Desulfovibrionales	Desulfovibrionaceae	Desulfovibrio	sp.HMT040	Non covered	Non covered	Non covered	Non covered	Non covered	Non covered	Non covered
Bacteria	Firmicutes	Negativicutes	Veillonellales	Veillonellaceae	Dialister	sp.HMT119	Non covered	Non covered	Non covered	Non covered	Non covered	Non covered	Non covered
Bacteria	Firmicutes	Erysipelotrichia	Erysipelotrichales	Erysipelotrichaceae	Eggerthia	catenaformis	Non covered	Non covered	Non covered	Covered	Covered	Covered	Covered
Bacteria	Proteobacteria	Betaproteobacteria	Neisseriales	Neisseriaceae	Eikenella	sp.HMT011	Non covered	Non covered	Non covered	Non covered	Non covered	Non covered	Non covered
Bacteria	Firmicutes	Erysipelotrichia	Erysipelotrichales	Erysipelotrichaceae	Erysipelotrichaceae [G-1]	bacterium_HMT904	Non covered	Non covered	Non covered	Covered	Covered	Covered	Covered
Bacteria	Firmicutes	Clostridia	Clostridiales	Lachnospiraceae [XIV]	Lachnospiraceae [G-7]	bacterium_HMT163	Non covered	Non covered	Non covered	Non covered	Non covered	Non covered	Non covered
Bacteria	Firmicutes	Bacilli	Lactobacillales	Lactobacillaceae	Lactobacillus	reuteri_clade_818	Non covered	Non covered	Non covered	Covered	Covered	Covered	Covered
Bacteria	Fusobacteria	Fusobacteriia	Fusobacteriales	Leptotrichiaceae	Leptotrichia	sp.HMT217	Non covered	Non covered	Non covered	Non covered	Non covered	Non covered	Non covered
Bacteria	Fusobacteria	Fusobacteriia	Fusobacteriales	Leptotrichiaceae	Leptotrichia	sp.HMT218	Covered	Covered	Covered	Non covered	Covered	Covered	Covered
Bacteria	Fusobacteria	Fusobacteriia	Fusobacteriales	Leptotrichiaceae	Leptotrichia	sp.HMT219	Non covered	Non covered	Non covered	Covered	Covered	Covered	Covered
Bacteria	Fusobacteria	Fusobacteriia	Fusobacteriales	Leptotrichiaceae	Leptotrichia	sp.HMT221	Non covered	Non covered	Non covered	Covered	Covered	Covered	Covered
Bacteria	Fusobacteria	Fusobacteriia	Fusobacteriales	Leptotrichiaceae	Leptotrichia	goodfellowii	Non covered	Non covered	Non covered	Covered	Covered	Covered	Covered
Archaea	Euryarchaeota	Methanobacteria	Methanobacteriales	Methanobacteriaceae	Methanobrevibacter	gottschalkii strain HO	Non covered	Non covered	Non covered	Non covered	Non covered	Non covered	Non covered
Bacteria	Firmicutes	Clostridia	Clostridiales	Peptostreptococcaceae [XI]	Mogibacterium	vescum	Non covered	Non covered	Non covered	Covered	Covered	Covered	Covered
Bacteria	Firmicutes	Clostridia	Clostridiales	Peptostreptococcaceae [XI]	Mogibacterium	timidum	Non covered	Non covered	Non covered	Covered	Covered	Covered	Covered
Bacteria	Firmicutes	Clostridia	Clostridiales	Peptostreptococcaceae [XI]	Mogibacterium	diversum	Non covered	Non covered	Non covered	Covered	Covered	Covered	Covered
Bacteria	Firmicutes	Clostridia	Clostridiales	Peptostreptococcaceae [XI]	Mogibacterium	neglectum	Non covered	Non covered	Non covered	Covered	Covered	Covered	Covered
Bacteria	Firmicutes	Clostridia	Clostridiales	Peptostreptococcaceae [XI]	Mogibacterium	pumilum	Non covered	Non covered	Non covered	Covered	Covered	Covered	Covered
Bacteria	Proteobacteria	Gammaproteobacteria	Pseudomonadales	Moraxellaceae	Moraxella	sp.HMT276	Non covered	Non covered	Non covered	Non covered	Non covered	Non covered	Non covered
Bacteria	Firmicutes	Mollicutes	Mycoplasmatales	Mycoplasmataceae	Mycoplasma	genitalium	Covered	Covered	Covered	Non covered	Covered	Covered	Covered
Bacteria	Firmicutes	Mollicutes	Mycoplasmatales	Mycoplasmataceae	Mycoplasma	pneumoniae	Covered	Covered	Covered	Non covered	Covered	Covered	Covered
Archaea	Nanoarchaeota	Unknown	Nanoarchaeales	Nanoarchaeaceae	Nanoarchaeum	equitans	Covered	Covered	Covered	Non covered	Non covered	Non covered	Non covered
Bacteria	Proteobacteria	Betaproteobacteria	Neisseriales	Neisseriaceae	Neisseria	lactamica	Non covered	Non covered	Non covered	Non covered	Non covered	Non covered	Non covered
Bacteria	Actinobacteria	Coriobacteriia	Coriobacteriales	Atopobiaceae	Olsenella	sp.HMT939	Non covered	Non covered	Non covered	Non covered	Non covered	Non covered	Non covered
Bacteria	Bacteroidetes	Sphingobacteriia	Sphingobacteriales	Sphingobacteriaceae	Pedobacter	sp.HMT318	Non covered	Non covered	Non covered	Non covered	Non covered	Non covered	Non covered
Bacteria	Bacteroidetes	Sphingobacteriia	Sphingobacteriales	Sphingobacteriaceae	Pedobacter	sp.HMT321	Non covered	Non covered	Non covered	Non covered	Non covered	Non covered	Non covered
Bacteria	Bacteroidetes	Sphingobacteriia	Sphingobacteriales	Sphingobacteriaceae	Pedobacter	sp.HMT933	Non covered	Non covered	Non covered	Non covered	Non covered	Non covered	Non covered
Bacteria	Firmicutes	Clostridia	Clostridiales	Peptoniphilaceae	Peptoniphilus	indolicus	Non covered	Non covered	Non covered	Non covered	Non covered	Non covered	Non covered
Bacteria	Firmicutes	Clostridia	Clostridiales	Peptostreptococcaceae [XI]	Peptostreptococcaceae [XI][G-3]	bacterium_HMT495	Non covered	Non covered	Non covered	Covered	Covered	Covered	Covered
Bacteria	Firmicutes	Clostridia	Clostridiales	Peptostreptococcaceae [XI]	Peptostreptococcaceae [XI][G-7]	bacterium_HMT922	Non covered	Non covered	Non covered	Non covered	Non covered	Non covered	Non covered
Archaea	Euryarchaeota	Thermoplasmata	Thermoplasmatales	Picrophilaceae	Picrophilus	torridus DSM 9790	Non covered	Non covered	Non covered	Non covered	Non covered	Non covered	Non covered
Bacteria	Bacteroidetes	Bacteroidia	Bacteroidales	Porphyromonadaceae	Porphyromonas	sp.HMT277	Non covered	Non covered	Non covered	Non covered	Non covered	Non covered	Non covered
Bacteria	Bacteroidetes	Bacteroidia	Bacteroidales	Porphyromonadaceae	Porphyromonas	sp.HMT284	Non covered	Non covered	Non covered	Non covered	Non covered	Non covered	Non covered
Bacteria	Bacteroidetes	Bacteroidia	Bacteroidales	Porphyromonadaceae	Porphyromonas	sp.HMT285	Non covered	Non covered	Non covered	Non covered	Non covered	Non covered	Non covered
Bacteria	Bacteroidetes	Bacteroidia	Bacteroidales	Prevotellaceae	Prevotella	sp.HMT293	Non covered	Non covered	Non covered	Non covered	Non covered	Non covered	Non covered
Bacteria	Bacteroidetes	Bacteroidia	Bacteroidales	Prevotellaceae	Prevotella	sp.HMT309	Non covered	Non covered	Non covered	Non covered	Non covered	Non covered	Non covered
Bacteria	Bacteroidetes	Bacteroidia	Bacteroidales	Prevotellaceae	Prevotella	sp.HMT515	Covered	Covered	Covered	Non covered	Non covered	Non covered	Non covered
Bacteria	Bacteroidetes	Bacteroidia	Bacteroidales	Prevotellaceae	Prevotella	sp.HMT942	Non covered	Non covered	Non covered	Non covered	Non covered	Non covered	Non covered
Bacteria	Bacteroidetes	Bacteroidia	Bacteroidales	Prevotellaceae	Prevotella	sp.HMT292	Non covered	Non covered	Non covered	Covered	Covered	Covered	Covered
Bacteria	Actinobacteria	Actinobacteria	Propionibacteriales	Propionibacteriaceae	Propionibacteriaceae [G-1]	bacterium_HMT915	Covered	Covered	Covered	Non covered	Covered	Covered	Covered
Bacteria	Actinobacteria	Actinobacteria	Propionibacteriales	Propionibacteriaceae	Propionibacteriaceae [G-2]	bacterium_HMT192	Covered	Covered	Covered	Non covered	Covered	Covered	Covered
Bacteria	Actinobacteria	Actinobacteria	Propionibacteriales	Propionibacteriaceae	Pseudopropionibacterium	sp.HMT194	Covered	Covered	Covered	Non covered	Covered	Covered	Covered
Bacteria	Actinobacteria	Actinobacteria	Propionibacteriales	Propionibacteriaceae	Pseudopropionibacterium	propionicum	Covered	Covered	Covered	Non covered	Covered	Covered	Covered
Bacteria	Saccharibacteria (TM7)	Saccharibacteria (TM7) [C-1]	Saccharibacteria (TM7) [O-1]	Saccharibacteria (TM7) [F-1]	Saccharibacteria (TM7) [G-1]	bacterium_HMT346	Covered	Covered	Covered	Non covered	Covered	Covered	Covered
Bacteria	Saccharibacteria (TM7)	Saccharibacteria (TM7) [C-1]	Saccharibacteria (TM7) [O-1]	Saccharibacteria (TM7) [F-1]	Saccharibacteria (TM7) [G-1]	bacterium_HMT347	Covered	Covered	Covered	Non covered	Covered	Covered	Covered
Bacteria	Saccharibacteria (TM7)	Saccharibacteria (TM7) [C-1]	Saccharibacteria (TM7) [O-1]	Saccharibacteria (TM7) [F-1]	Saccharibacteria (TM7) [G-1]	bacterium_HMT348	Covered	Covered	Covered	Non covered	Covered	Covered	Covered
Bacteria	Saccharibacteria (TM7)	Saccharibacteria (TM7) [C-1]	Saccharibacteria (TM7) [O-1]	Saccharibacteria (TM7) [F-1]	Saccharibacteria (TM7) [G-1]	bacterium_HMT349	Covered	Covered	Covered	Non covered	Covered	Covered	Covered
Bacteria	Saccharibacteria (TM7)	Saccharibacteria (TM7) [C-1]	Saccharibacteria (TM7) [O-1]	Saccharibacteria (TM7) [F-1]	Saccharibacteria (TM7) [G-1]	bacterium_HMT352	Covered	Covered	Covered	Non covered	Covered	Covered	Covered
Bacteria	Saccharibacteria (TM7)	Saccharibacteria (TM7) [C-1]	Saccharibacteria (TM7) [O-1]	Saccharibacteria (TM7) [F-1]	Saccharibacteria (TM7) [G-1]	bacterium_HMT488	Covered	Covered	Covered	Non covered	Covered	Covered	Covered
Bacteria	Saccharibacteria (TM7)	Saccharibacteria (TM7) [C-1]	Saccharibacteria (TM7) [O-1]	Saccharibacteria (TM7) [F-1]	Saccharibacteria (TM7) [G-1]	bacterium_HMT869	Covered	Covered	Covered	Non covered	Covered	Covered	Covered
Bacteria	Saccharibacteria (TM7)	Saccharibacteria (TM7) [C-1]	Saccharibacteria (TM7) [O-1]	Saccharibacteria (TM7) [F-1]	Saccharibacteria (TM7) [G-1]	bacterium_HMT952	Covered	Covered	Covered	Non covered	Covered	Covered	Covered
Bacteria	Saccharibacteria (TM7)	Saccharibacteria (TM7) [C-1]	Saccharibacteria (TM7) [O-1]	Saccharibacteria (TM7) [F-1]	Saccharibacteria (TM7) [G-2]	bacterium_HMT350	Covered	Covered	Covered	Non covered	Covered	Covered	Covered
Bacteria	Saccharibacteria (TM7)	Saccharibacteria (TM7) [C-1]	Saccharibacteria (TM7) [O-1]	Saccharibacteria (TM7) [F-1]	Saccharibacteria (TM7) [G-3]	bacterium_HMT351	Covered	Covered	Covered	Non covered	Covered	Covered	Covered
Bacteria	Saccharibacteria (TM7)	Saccharibacteria (TM7) [C-1]	Saccharibacteria (TM7) [O-1]	Saccharibacteria (TM7) [F-1]	Saccharibacteria (TM7) [G-4]	bacterium_HMT355	Covered	Covered	Covered	Non covered	Covered	Covered	Covered
Bacteria	Saccharibacteria (TM7)	Saccharibacteria (TM7) [C-1]	Saccharibacteria (TM7) [O-1]	Saccharibacteria (TM7) [F-2]	Saccharibacteria (TM7) [G-5]	bacterium_HMT356	Covered	Covered	Covered	Non covered	Covered	Covered	Covered
Bacteria	Saccharibacteria (TM7)	Saccharibacteria (TM7) [C-1]	Saccharibacteria (TM7) [O-1]	Saccharibacteria (TM7) [F-1]	Saccharibacteria (TM7) [G-6]	bacterium_HMT870	Covered	Covered	Covered	Non covered	Covered	Covered	Covered
Bacteria	Saccharibacteria (TM7)	Saccharibacteria (TM7) [C-1]	Saccharibacteria (TM7) [O-1]	Saccharibacteria (TM7) [F-1]	Saccharibacteria (TM7) [G-7]	bacterium_HMT954	Non covered	Non covered	Non covered	Non covered	Non covered	Non covered	Non covered
Bacteria	Saccharibacteria (TM7)	Saccharibacteria (TM7) [C-1]	Saccharibacteria (TM7) [O-1]	Saccharibacteria (TM7) [F-1]	Saccharibacteria (TM7) [G-8]	bacterium_HMT955	Covered	Covered	Covered	Non covered	Covered	Covered	Covered
Bacteria	Firmicutes	Negativicutes	Selenomonadales	Selenomonadaceae	Selenomonas	sp.HMT133	Non covered	Non covered	Non covered	Non covered	Non covered	Non covered	Non covered
Bacteria	Firmicutes	Negativicutes	Selenomonadales	Selenomonadaceae	Selenomonas	sp.HMT137	Non covered	Non covered	Non covered	Non covered	Non covered	Non covered	Non covered
Bacteria	Firmicutes	Negativicutes	Selenomonadales	Selenomonadaceae	Selenomonas	sp.HMT892	Non covered	Non covered	Non covered	Non covered	Non covered	Non covered	Non covered
Bacteria	Firmicutes	Negativicutes	Selenomonadales	Selenomonadaceae	Selenomonas	sp.HMT936	Non covered	Non covered	Non covered	Non covered	Non covered	Non covered	Non covered
Bacteria	Proteobacteria	Alphaproteobacteria	Sphingomonadales	Sphingomonadaceae	Sphingomonas	sp.HMT004	Non covered	Non covered	Non covered	Non covered	Non covered	Non covered	Non covered
Bacteria	Spirochaetes	Spirochaetia	Spirochaetales	Spirochaetaceae	Treponema	sp.HMT258	Non covered	Non covered	Non covered	Covered	Non covered	Non covered	Non covered
Bacteria	Spirochaetes	Spirochaetia	Spirochaetales	Spirochaetaceae	Treponema	sp.HMT269	Non covered	Non covered	Non covered	Non covered	Non covered	Non covered	Non covered
Bacteria	Spirochaetes	Spirochaetia	Spirochaetales	Spirochaetaceae	Treponema	sp.HMT270	Covered	Covered	Covered	Covered	Non covered	Non covered	Non covered
Bacteria	Spirochaetes	Spirochaetia	Spirochaetales	Spirochaetaceae	Treponema	sp.HMT927	Non covered	Non covered	Non covered	Non covered	Non covered	Non covered	Non covered
Bacteria	Spirochaetes	Spirochaetia	Spirochaetales	Spirochaetaceae	Treponema	sp.HMT260	Non covered	Non covered	Non covered	Covered	Covered	Covered	Covered
Bacteria	Spirochaetes	Spirochaetia	Spirochaetales	Spirochaetaceae	Treponema	sp.HMT490	Non covered	Non covered	Non covered	Covered	Covered	Covered	Covered
Bacteria	Spirochaetes	Spirochaetia	Spirochaetales	Spirochaetaceae	Treponema	lecithinolyticum	Non covered	Non covered	Non covered	Covered	Covered	Covered	Covered
Bacteria	Spirochaetes	Spirochaetia	Spirochaetales	Spirochaetaceae	Treponema	maltophilum	Non covered	Non covered	Non covered	Covered	Covered	Covered	Covered
